# Supplementary material for: Transcriptomic and Proteomic Analysis of Arion vulgaris—Proteins for Probably Successful Survival Strategies?
Source: PLoS One. 2016 Mar 17;11(3):e0150614. doi: 10.1371/journal.pone.0150614 (PMC4795696; doi:10.1371/journal.pone.0150614)
Supplement: S2 Table — (XLSX) [file pone.0150614.s002.xlsx]

## Sheet: Abbreviation
Abbreviations used for protein identification
acc_embl	EMBL accession number
prot_acc	UniProt accesion number
prot_hit	hit in the NCBI nr database, cut off value of 1e-6
unique_peptides	number of unique peptides
prot_cover	protein coverage (%)
prot_matches	number of assigned peptide matches
prot_sequences	number of protein sequences
prot_score	MASCOT score
source	spot number

## Sheet: 2-DE
acc_embl	prot_acc	prot_hit	unique_peptides	prot_cover	num_matches	num_sequences	prot_score	source
HACG01041396	A0A0B7B7G5	gi|104162064|emb|CAK19329.1|	4	41.9643	4	67	1303.56	5,129,131,134,135,136,137,139,143,145,146,171,181,182,185,189,191,210,211,220,240,241,243,244,124,180,176,
HACG01035125	A0A0B7AQ26	gi|115111533|gb|ABI84147.1|	2	6.29723	2	4	77.46	147,207,
HACG01027986	A0A0B7A484	gi|1174755|sp|P43689.1|TPM2_BIOGL	3	14.876	3	3	51.5233	248,
HACG01027994	A0A0B7A1Q2	gi|1174755|sp|P43689.1|TPM2_BIOGL	5	38.8235	12	63	965.143	84,226,227,234,244,243,
HACG01022766	A0A0B6ZP52	gi|119568248|gb|EAW47863.1|	2	6.70927	2	2	35.71	196,228,
HACG01044080	A0A0B7BFQ7	gi|124233|sp|P22488.2|IFEA_HELAS	25	51.7361	30	304	6401.41	20,22,23,24,25,26,28,118,196,27,30,115,145,
HACG01016621	A0A0B6Z6H1	gi|126697356|gb|ABO26635.1|	9	34.7458	9	58	1174.79	123,
HACG01037885	A0A0B7AXF0	gi|126697362|gb|ABO26638.1|	7	45.5128	7	45	567.138	49,150,226,227,228,231,232,233,236,239,242,245,
HACG01035188	A0A0B7AMM4	gi|126697398|gb|ABO26656.1|	2	10.0529	2	2	50.33	121,316,
HACG01025504	A0A0B6ZUR5	gi|126697398|gb|ABO26656.1|	4	16.9312	4	10	234.53	119,120,122,126,140,314,
HACG01023214	A0A0B6ZN56	gi|126697410|gb|ABO26662.1|	3	18.1818	3	34	727.109	102,175,176,183,184,185,240,145,
HACG01042834	A0A0B7B8N8	gi|126697420|gb|ABO26667.1|	37	61.7706	37	165	2542.91	49,233,232,50,240,241,230,122,129,130,131,123,128,
HACG01042329	A0A0B7B774	gi|127773|sp|P24733.1|MYS_ARGIR	41	39.4845	70	660	11244	8,167,187,191,192,193,194,195,196,197,204,205,206,207,208,64,65,77,102,118,129,188,189,190,199,201,202,203,209,225,66,80,212,137,200,
HACG01002577	A0A0B6XZI3	gi|133874728|gb|ABO40828.1|	3	12.5	3	4	61.34	230,235,236,
HACG01024295	A0A0B6ZTS1	gi|147905746|ref|NP_001080566.1|	39	73.2426	47	395	4497.13	47,49,229,230,250,102,245,246,100,124,101,122,123,125,126,127,130,132,102,103,119,120,129,131,
HACG01036073	A0A0B7AQ36	gi|149032103|gb|EDL87015.1|	2	10.8911	3	10	185.07	147,153,
HACG01036077	A0A0B7AQV8	gi|149627356|ref|XP_001508693.1|	2	14.4068	2	5	114.68	22,229,230,
HACG01027768	A0A0B7A1D3	gi|150251390|gb|ABR68007.1|	2	12.9213	2	4	66.04	77,78,
HACG01016312	A0A0B6Z477	gi|150251390|gb|ABR68007.1|	3	8.91365	3	8	175.83	2,29,50,194,205,32,136,
HACG01030661	A0A0B7AC05	gi|150251390|gb|ABR68007.1|	3	5.68807	3	3	86.2733	31,
HACG01046904	A0A0B7BK99	gi|150251390|gb|ABR68007.1|	3	18.3962	3	3	44.7333	27,31,79,
HACG01046905	A0A0B7BNM3	gi|150251390|gb|ABR68007.1|	6	11.8705	6	47	406.328	13,76,129,132,134,200,201,202,203,204,205,206,207,212,218,219,220,221,222,133,137,176,211,
HACG01002122	A0A0B6XY64	gi|150251390|gb|ABR68007.1|	9	23.1121	9	95	1957.8	29,46,51,52,53,55,56,57,58,59,60,61,63,64,65,67,69,73,102,166,224,225,223,
HACG01018643	A0A0B6ZAK4	gi|150251392|gb|ABR68008.1|	4	7.65217	4	10	202.39	8,205,207,16,50,102,177,206,
HACG01037656	A0A0B7AWV4	gi|152032020|gb|ABS28869.1|	6	21.5548	6	86	887.691	101,113,114,126,127,128,129,133,134,156,161,162,237,176,
HACG01000828	A0A0B6XUV1	gi|156399584|ref|XP_001638581.1|	8	57.3427	12	67	1618.79	240,
HACG01005410	A0A0B6Y9Y9	gi|158997667|gb|ABW86957.1|	4	35.1562	4	51	1029.7	153,155,156,157,159,161,176,185,208,227,240,242,154,162,175,
HACG01020565	A0A0B6ZI91	gi|168252891|gb|ACA23131.1|	7	52.5	7	16	301.877	153,185,245,240,
HACG01005464	A0A0B6Y847	gi|170596696|ref|XP_001902862.1|	1	17.0213	2	11	257.256	3,65,168,180,225,227,239,
HACG01020755	A0A0B6ZIN1	gi|206597719|gb|ACI15835.1|	2	22.4299	2	2	67.23	240,
HACG01023930	A0A0B6ZSS2	gi|2073142|dbj|BAA19861.1|	2	9.94764	2	7	133.644	155,156,
HACG01041706	A0A0B7B8E9	gi|2073142|dbj|BAA19861.1|	2	10.8974	2	4	81.15	156,170,
HACG01018944	A0A0B6ZB52	gi|2073142|dbj|BAA19861.1|	7	54.6053	7	190	4406.86	102,104,170,175,176,158,161,162,166,171,173,185,242,
HACG01024954	A0A0B6ZT36	gi|2073142|dbj|BAA19861.1|	8	42.9487	8	122	2763.84	93,96,98,126,129,143,153,154,157,159,161,162,166,170,175,176,182,185,220,240,241,242,243,128,99,103,142,208,
HACG01032978	A0A0B7AGC8	gi|2073142|dbj|BAA19861.1|	16	71.2329	16	138	1785.58	153,154,155,156,157,159,161,162,176,346,347,
HACG01025480	A0A0B6ZX55	gi|2073146|dbj|BAA19863.1|	2	26.506	2	15	502.173	8,51,153,154,156,245,246,262,341,342,
HACG01041231	A0A0B7B721	gi|210076789|gb|ACJ06748.1|	2	16.1017	2	6	142.49	137,140,143,
HACG01041235	A0A0B7B7L8	gi|210076789|gb|ACJ06748.1|	3	26.5625	3	10	202.59	137,138,140,143,
HACG01038883	A0A0B7AY52	gi|218683625|gb|ACL00841.1|	2	9.45274	2	2	51.83	102,
HACG01029389	A0A0B7A5L0	gi|218683627|gb|ACL00842.1|	19	39.1608	19	31	489.627	28,230,135,
HACG01016085	A0A0B6Z5J3	gi|220067263|gb|ACL79834.1|	44	75.9596	44	566	12444.8	4,34,35,42,43,44,45,46,47,55,56,57,59,61,62,68,79,89,113,114,119,120,126,160,8,32,63,78,91,115,116,167,66,118,140,142,60,81,117,41,95,184,190,191,203,205,310,204,
HACG01038090	A0A0B7AYN3	gi|220979902|emb|CAQ64775.1|	3	13.6752	3	4	86.39	123,
HACG01020116	A0A0B6ZGL3	gi|225717556|gb|ACO14624.1|	2	10.5485	2	3	69.6067	142,
HACG01040303	A0A0B7B286	gi|226478902|emb|CAX72946.1|	6	20.5446	7	12	198.3	28,62,68,119,
HACG01035498	A0A0B7ANE5	gi|241151391|ref|XP_002406661.1|	1	13.9364	5	8	208.995	50,
HACG01019419	A0A0B6ZCG8	gi|241273677|ref|XP_002406620.1|	11	25.5656	11	82	1095.36	46,56,57,63,224,51,52,55,62,71,241,243,144,145,147,149,184,185,188,211,212,
HACG01035716	A0A0B7ARF8	gi|253317417|gb|ACT22633.1|	3	47	6	48	407.454	59,60,104,161,162,223,103,105,225,
HACG01016916	A0A0B6Z764	gi|260781473|ref|XP_002585834.1|	2	14.0845	2	3	51.6133	154,
HACG01037692	A0A0B7AVA2	gi|260821662|ref|XP_002606151.1|	3	16.0099	5	11	225.135	16,32,68,207,119,
HACG01040300	A0A0B7B4W9	gi|260821662|ref|XP_002606151.1|	3	13.253	5	31	338.505	28,29,32,47,49,50,61,109,147,153,154,156,245,246,
HACG01048457	A0A0B7BQS5	gi|2827905|gb|AAB99911.1|	1	3.58814	2	5	149.74	20,21,
HACG01038212	A0A0B7AWQ6	gi|291235073|ref|XP_002737469.1|	7	24.4541	7	19	252.638	103,127,132,104,125,128,274,
HACG01021699	A0A0B6ZIV8	gi|296190822|ref|XP_002743358.1|	8	13.253	8	15	242.4	28,106,132,140,49,239,104,
HACG01026542	A0A0B6ZYJ1	gi|296837083|gb|ADH59421.1|	28	66.9065	42	1397	26937.5	61,79,82,83,90,92,93,95,96,97,98,99,100,114,116,118,124,127,131,153,201,202,203,211,219,220,221,222,226,227,230,232,234,
HACG01046369	A0A0B7BJZ7	gi|305689815|gb|ADM64337.1|	48	72.9293	48	965	19654.2	8,32,34,35,36,37,38,39,40,42,43,47,49,50,72,73,74,75,82,83,95,117,118,121,126,134,135,137,141,142,154,162,169,173,19,33,41,71,76,79,84,96,100,116,119,138,139,140,90,129,132,113,170,76,129,131,194,196,197,127,132,195,235,130,191,193,200,128,192,198,247,126,
HACG01046784	A0A0B7BJW9	gi|318609972|dbj|BAJ61596.1|	96	71.4286	97	2700	44575.3	3,4,6,7,8,20,102,103,104,167,186,187,188,189,190,191,192,193,194,195,196,197,198,199,200,201,202,203,204,205,207,210,211,97,206,208,209,226,5,212,12,16,28,51,53,55,183,89,105,107,108,109,110,111,112,147,153,178,227,240,244,245,246,21,101,106,118,161,58,61,86,116,119,120,135,136,138,46,141,143,159,176,180,184,185,10,18,19,20,24,25,26,12,17,21,23,27,291,293,22,
HACG01036550	A0A0B7AU63	gi|321472487|gb|EFX83457.1|	13	21.1949	13	38	515.743	217,218,219,244,
HACG01024722	A0A0B6ZT97	gi|325197136|ref|NP_001191419.1|	15	83.5714	15	137	2191.6	153,156,154,155,157,159,240,245,170,185,246,161,176,347,
HACG01045619	A0A0B7BGN5	gi|325197162|ref|NP_001191425.1|	3	12.5984	3	8	133.275	62,68,222,
HACG01045625	A0A0B7BK47	gi|325197162|ref|NP_001191425.1|	5	29.4521	5	5	101.26	62,68,
HACG01043219	A0A0B7B9S4	gi|325296727|ref|NP_001191598.1|	6	24.5098	6	7	79.2657	245,246,298,299,
HACG01044036	A0A0B7BF17	gi|325296743|ref|NP_001191607.1|	3	5.7725	3	11	208.488	19,22,23,207,212,177,182,
HACG01013367	A0A0B6YVR0	gi|325296803|ref|NP_001191642.1|	2	17.6	2	3	72.5367	158,174,
HACG01049724	A0A0B7BTQ8	gi|325296803|ref|NP_001191642.1|	4	32.4841	4	8	125.76	173,181,
HACG01031558	A0A0B7ACG2	gi|325296839|ref|NP_001191661.1|	5	30.9524	5	6	93.18	147,305,
HACG01017555	A0A0B6Z9P2	gi|325296883|ref|NP_001191473.1|	2	10.3261	2	2	52.65	122,147,
HACG01033397	A0A0B7AI15	gi|325296986|ref|NP_001191507.1|	9	12.2898	9	34	621.481	2,4,143,210,217,218,3,89,65,
HACG01002120	A0A0B6Y0F8	gi|325296989|ref|NP_001191508.1|	2	10	2	3	54.3233	102,286,
HACG01044436	A0A0B7BG60	gi|325296989|ref|NP_001191508.1|	23	66.9355	23	102	1712.7	120,142,121,319,320,
HACG01036337	A0A0B7ARH9	gi|325296995|ref|NP_001191510.1|	4	38.0645	4	7	102.456	160,
HACG01038478	A0A0B7AX00	gi|325297040|ref|NP_001191523.1|	4	10.5263	4	8	127.935	49,131,132,
HACG01038482	A0A0B7AXH2	gi|325297040|ref|NP_001191523.1|	12	39.9177	12	43	438.58	119,120,121,123,131,228,229,
HACG01041507	A0A0B7B670	gi|325297052|ref|NP_001191530.1|	11	65.1111	35	109	1751.4	16,49,50,128,
HACG01030256	A0A0B7AAS1	gi|325297144|ref|NP_001191581.1|	8	15.3383	8	17	207.664	53,98,104,105,115,
HACG01012401	A0A0B6YTZ0	gi|325297146|ref|NP_001191582.1|	2	17.1123	6	10	209.36	53,138,
HACG01009296	A0A0B6YK18	gi|325297146|ref|NP_001191582.1|	10	45.5285	14	28	435.007	53,138,139,140,141,
HACG01030596	A0A0B7ABV6	gi|325504381|emb|CBX41690.1|	4	24.359	4	17	170.038	155,156,183,185,
HACG01023901	A0A0B6ZSF2	gi|328933188|gb|AEB70965.1|	14	48.6068	14	86	1453.84	59,61,66,67,77,78,96,141,226,233,
HACG01047764	A0A0B7BMV8	gi|333449383|gb|AEF33378.1|	2	16.8919	2	3	103.693	166,170,
HACG01032822	A0A0B7AGB0	gi|346987840|gb|AEO51766.1|	3	12.7572	3	60	1298.24	8,20,21,22,23,24,29,30,44,70,77,82,96,99,142,168,170,172,173,175,176,180,182,187,191,192,193,205,207,227,203,206,208,
HACG01034365	A0A0B7AMR8	gi|346987840|gb|AEO51766.1|	15	22.37	15	78	1163.81	97,167,186,187,190,191,192,193,195,203,207,189,197,198,194,205,208,
HACG01048718	A0A0B7BRG8	gi|346987840|gb|AEO51766.1|	16	7.90718	17	23	324.768	192,
HACG01048711	A0A0B7BT79	gi|346987840|gb|AEO51766.1|	28	13.2269	28	167	2235.11	65,97,191,193,194,205,78,100,167,186,187,190,195,197,198,199,207,188,196,200,203,206,208,102,103,116,212,
HACG01044223	A0A0B7BDN3	gi|346987844|gb|AEO51768.1|	2	8.00781	4	7	161.41	193,
HACG01044221	A0A0B7BFK4	gi|346987844|gb|AEO51768.1|	6	14.9451	7	30	371.543	167,189,191,192,193,207,
HACG01048715	A0A0B7BTV5	gi|346987844|gb|AEO51768.1|	7	4.08063	8	9	189.742	189,
HACG01048717	A0A0B7BRR5	gi|346987844|gb|AEO51768.1|	9	5.01337	9	35	985.153	79,183,211,226,
HACG01025845	A0A0B6ZY72	gi|348577231|ref|XP_003474388.1|	2	9.87124	2	2	59.03	145,
HACG01012119	A0A0B6YRU8	gi|351709298|gb|EHB12217.1|	8	53.7736	8	191	3216.8	8,36,51,97,127,129,167,171,177,178,181,182,183,204,208,211,226,227,240,241,243,244,245,246,137,143,257,340,
HACG01042493	A0A0B7B8M4	gi|353236678|emb|CCA68668.1|	7	24.3386	7	13	265.879	59,60,66,
HACG01040354	A0A0B7B513	gi|374718481|gb|AEZ67032.1|	3	6.27706	3	8	92.265	51,204,209,210,215,135,136,236,
HACG01026990	A0A0B7A1M5	gi|38043955|emb|CAD83837.1|	2	7.83133	2	4	51.53	129,178,220,196,
HACG01030594	A0A0B7A907	gi|38043955|emb|CAD83837.1|	2	10.5263	2	11	131.945	153,154,157,159,161,176,240,162,262,
HACG01042553	A0A0B7B8T9	gi|385145402|emb|CCG28026.1|	12	36.1345	12	63	1156.84	28,50,185,
HACG01042549	A0A0B7B7V9	gi|385145402|emb|CCG28026.1|	42	85.6383	45	2211	30113	8,11,12,13,16,17,20,22,23,25,29,30,32,41,42,43,44,46,47,48,49,51,52,53,54,55,56,57,58,59,60,61,62,63,64,65,66,69,70,73,76,79,97,101,102,103,104,105,106,107,108,111,112,152,153,154,155,157,159,161,162,167,176,183,189,190,191,192,194,196,199,200,202,203,204,205,206,207,210,211,212,217,218,219,220,221,222,223,224,225,226,228,229,230,231,235,236,237,238,245,247,248,249,250,251,252,75,110,135,147,158,…
HACG01015202	A0A0B6Z0Z6	gi|390349570|ref|XP_782388.3|	2	67.3077	9	33	582.646	125,127,251,153,244,
HACG01046079	A0A0B7BHZ4	gi|402227989|gb|AFQ35982.1|	2	7.8341	2	2	46.78	108,
HACG01006594	A0A0B6YBE1	gi|402578741|gb|EJW72694.1|	8	37.7778	8	108	1422.04	3,14,15,18,19,21,26,27,31,34,36,38,39,40,72,74,77,109,121,188,193,195,208,209,246,24,37,45,71,85,89,99,100,122,130,132,137,151,164,173,232,241,243,77,81,121,184,262,266,285,337,338,119,
HACG01022287	A0A0B6ZL73	gi|405951515|gb|EKC19421.1|	4	12.1839	4	7	233.276	75,83,126,
HACG01036732	A0A0B7ASK0	gi|405952673|gb|EKC20457.1|	1	10.6742	2	3	56.6733	162,
HACG01044300	A0A0B7BG67	gi|405952673|gb|EKC20457.1|	6	31.3953	7	35	408.976	158,162,183,160,168,173,
HACG01022033	A0A0B6ZM00	gi|405953142|gb|EKC20858.1|	14	32.7549	14	81	973.155	27,132,217,218,219,31,76,
HACG01037085	A0A0B7AVS2	gi|405959696|gb|EKC25703.1|	4	13.0719	4	42	672.327	70,75,78,79,80,82,90,95,100,226,227,
HACG01035745	A0A0B7ARR8	gi|405960426|gb|EKC26351.1|	39	67.2032	39	228	4756.34	34,37,39,41,42,43,47,72,74,135,185,220,221,35,38,50,66,70,222,40,126,131,132,196,200,127,
HACG01022129	A0A0B6ZK72	gi|405964935|gb|EKC30373.1|	2	3.43797	2	2	38.82	218,
HACG01041751	A0A0B7B8I3	gi|405965644|gb|EKC31006.1|	2	8.65385	2	4	58.04	113,134,115,
HACG01041753	A0A0B7B6G9	gi|405965644|gb|EKC31006.1|	3	13.6364	3	4	88.74	114,
HACG01022928	A0A0B6ZMB4	gi|405965813|gb|EKC31167.1|	3	13.5747	3	7	78.9329	102,103,
HACG01021681	A0A0B6ZL27	gi|405967885|gb|EKC33004.1|	2	10.0372	2	2	66.4	116,
HACG01035098	A0A0B7AME5	gi|405969794|gb|EKC34745.1|	2	14.7651	2	5	129.93	66,67,
HACG01046199	A0A0B7BIA1	gi|405969853|gb|EKC34799.1|	2	3.59589	2	2	46.09	217,
HACG01026898	A0A0B6ZYS9	gi|405970776|gb|EKC35652.1|	5	34	5	20	217.01	149,224,239,
HACG01028799	A0A0B7A3Z3	gi|405972388|gb|EKC37161.1|	10	42.6724	10	11	240.215	137,
HACG01042269	A0A0B7B722	gi|405972472|gb|EKC37239.1|	4	7.52864	4	8	220.945	25,26,27,178,218,
HACG01034823	A0A0B7ALF3	gi|405972489|gb|EKC37255.1|	2	10.2679	2	2	81.04	64,
HACG01011710	A0A0B6YSW4	gi|405973356|gb|EKC38075.1|	4	18.0952	4	7	80.8771	108,120,
HACG01023869	A0A0B6ZQ13	gi|405974628|gb|EKC39257.1|	2	5.45455	2	9	246.807	50,102,103,143,120,
HACG01005168	A0A0B6Y7G7	gi|405975533|gb|EKC40092.1|	2	10.3321	2	2	92.09	89,
HACG01026815	A0A0B7A146	gi|405975785|gb|EKC40331.1|	45	64.4658	48	342	6259.27	1,2,3,4,5,210,89,217,6,7,10,21,87,102,114,117,119,120,125,135,136,138,141,206,207,211,35,37,38,39,40,36,
HACG01035937	A0A0B7AQC8	gi|405976077|gb|EKC40598.1|	6	9.96885	6	11	195.567	217,218,219,
HACG01038459	A0A0B7AZ38	gi|405978690|gb|EKC43060.1|	2	4.21245	2	2	78.47	33,
HACG01006304	A0A0B6YAE4	gi|406679464|gb|AFS50734.1|	2	13.7363	2	5	94.11	43,109,229,230,
HACG01049651	A0A0B7BVZ4	gi|421975936|gb|AFX73000.1|	6	20.7254	6	52	498.848	168,169,174,180,181,173,177,183,
HACG01042332	A0A0B7B8F8	gi|4249742|gb|AAD13782.1|	4	11.4007	4	4	80.74	170,
HACG01027996	A0A0B7A2N2	gi|42559558|sp|O97192.1|TPM_HELAS	2	19.3662	7	15	259.343	101,
HACG01027999	A0A0B7A234	gi|42559558|sp|O97192.1|TPM_HELAS	4	26.0563	9	19	264.41	101,
HACG01028005	A0A0B7A4G7	gi|42559558|sp|O97192.1|TPM_HELAS	5	51.0563	19	277	4876.81	167,228,235,236,
HACG01028008	A0A0B7A242	gi|42559558|sp|O97192.1|TPM_HELAS	17	65.1408	29	574	9620.36	229,230,231,232,233,
HACG01027985	A0A0B7A4E2	gi|42559558|sp|O97192.1|TPM_HELAS	30	84.8592	40	1540	26057.5	8,16,49,83,89,97,124,151,155,167,226,227,228,229,230,231,232,233,234,235,236,237,245,247,249,250,243,244,102,103,162,
HACG01003546	A0A0B6Y3K1	gi|42560362|gb|AAS20336.1|	2	31.2057	5	209	4192.32	50,52,59,60,64,75,97,104,223,224,225,161,162,156,140,
HACG01039672	A0A0B7B0Y4	gi|431831576|gb|AGA92562.1|	5	38.9262	5	9	192.929	158,166,
HACG01047623	A0A0B7BNI1	gi|443692429|gb|ELT94023.1|	28	71.0145	28	313	6839.41	71,72,73,74,76,166,224,120,140,223,
HACG01022035	A0A0B6ZMG4	gi|443694956|gb|ELT95974.1|	4	25.9259	4	25	279.6	30,217,218,
HACG01023411	A0A0B6ZR11	gi|443705209|gb|ELU01864.1|	3	22.043	3	7	162.963	102,120,123,140,
HACG01034502	A0A0B7AKI1	gi|443708569|gb|ELU03646.1|	6	21.6667	6	18	417.071	230,231,234,235,236,
HACG01028424	A0A0B7A2X0	gi|443729497|gb|ELU15363.1|	3	6.85841	3	3	87.2867	43,
HACG01005800	A0A0B6YB02	gi|4504279|ref|NP_002098.1|	4	19.1176	4	28	130.841	158,160,184,204,227,241,209,
HACG01039956	A0A0B7B3E7	gi|46276960|gb|AAS86676.1|	2	6.84524	2	3	61.7433	67,
HACG01021622	A0A0B6ZJD3	gi|468860736|gb|AGH32328.1|	5	7.98898	5	7	139.411	211,244,
HACG01022146	A0A0B6ZMC0	gi|472824675|dbj|BAN09030.1|	30	54.5977	30	879	14670.4	8,46,51,52,53,54,55,56,57,58,63,64,65,67,69,72,75,76,77,78,79,80,81,82,83,84,91,93,95,123,223,224,225,226,227,247,248,249,250,252,73,48,62,68,71,74,94,103,106,167,228,140,144,149,184,213,214,186,
HACG01033263	A0A0B7AH49	gi|472824679|dbj|BAN09032.1|	3	39.3162	4	29	223.025	199,200,201,202,203,
HACG01012785	A0A0B6YW04	gi|4929136|gb|AAD33872.1|AF141348_1	5	19.2308	5	10	218.89	100,120,121,122,134,136,
HACG01005256	A0A0B6Y8G4	gi|51105058|gb|AAT97089.1|	1	11.1675	2	2	74.81	49,
HACG01027528	A0A0B7A0L9	gi|51105058|gb|AAT97089.1|	4	7.89474	4	6	106.733	124,125,
HACG01027527	A0A0B7A1E2	gi|51105058|gb|AAT97089.1|	15	31.1778	16	38	289.744	49,229,245,121,122,123,129,124,128,
HACG01013080	A0A0B6YWY0	gi|51105064|gb|AAT97092.1|	7	30.605	7	28	580.213	61,77,226,227,234,235,66,167,243,
HACG01012712	A0A0B6YTZ2	gi|513137512|gb|AGO20698.1|	10	17.6471	10	23	269.78	44,68,222,62,207,208,
HACG01002083	A0A0B6XYQ1	gi|521024335|gb|EPQ06123.1|	4	14.7982	4	14	181.581	131,135,136,137,183,185,
HACG01040831	A0A0B7B5W6	gi|524863982|ref|XP_005088830.1|	2	25	2	3	52.14	178,
HACG01040330	A0A0B7B4I1	gi|524863988|ref|XP_005088833.1|	4	19.5122	4	6	148.03	119,138,
HACG01012641	A0A0B6YUN8	gi|524864066|ref|XP_005088871.1|	2	14.3939	2	5	59.38	185,240,
HACG01037961	A0A0B7AXN5	gi|524864482|ref|XP_005089076.1|	9	25	9	26	612.065	221,222,
HACG01037315	A0A0B7AWA0	gi|524864532|ref|XP_005089101.1|	3	10.3194	3	6	111.43	72,75,219,225,
HACG01024276	A0A0B6ZTH2	gi|524864582|ref|XP_005089126.1|	2	8.84956	2	2	49.77	138,
HACG01012671	A0A0B6YUR8	gi|524864622|ref|XP_005089146.1|	2	5.84112	2	8	225.98	58,64,137,160,169,174,223,
HACG01031161	A0A0B7ADB9	gi|524864626|ref|XP_005089148.1|	5	16.474	5	8	133.51	61,78,178,
HACG01049708	A0A0B7BUA5	gi|524864665|ref|XP_005089167.1|	3	18.125	3	7	92.1257	183,184,
HACG01038106	A0A0B7AY56	gi|524865020|ref|XP_005089342.1|	3	32.8125	3	8	269.755	25,26,27,217,
HACG01038104	A0A0B7AVC2	gi|524865020|ref|XP_005089342.1|	7	16.5865	7	15	340.077	25,26,27,
HACG01018330	A0A0B6ZBQ4	gi|524865616|ref|XP_005089636.1|	6	20.2346	6	13	358.479	61,67,
HACG01037564	A0A0B7ATU3	gi|524865670|ref|XP_005089662.1|	6	52	6	117	2464.96	73,107,108,111,118,119,120,126,137,139,140,141,142,143,153,280,312,314,321,322,
HACG01029047	A0A0B7A5L6	gi|524865670|ref|XP_005089662.1|	13	62.1622	16	168	4244.41	119,120,122,128,137,139,141,143,325,
HACG01037565	A0A0B7AX16	gi|524865670|ref|XP_005089662.1|	19	90.1961	20	397	10161.1	73,79,90,91,107,108,111,116,118,119,120,125,126,137,138,139,140,141,142,143,173,185,280,314,321,322,323,
HACG01047140	A0A0B7BPF8	gi|524865813|ref|XP_005089733.1|	2	9.95671	2	12	155.067	107,108,110,111,120,141,
HACG01048526	A0A0B7BSM6	gi|524865891|ref|XP_005089771.1|	2	6.80272	2	6	107.457	34,36,35,45,
HACG01022125	A0A0B6ZMS2	gi|524865955|ref|XP_005089803.1|	20	67.7291	20	142	2803.93	116,118,119,135,136,138,139,140,323,
HACG01039135	A0A0B7B1M6	gi|524866272|ref|XP_005089958.1|	9	24.7232	9	21	433.418	113,114,115,117,127,134,126,274,
HACG01039136	A0A0B7B140	gi|524866272|ref|XP_005089958.1|	10	35.316	10	29	588.17	118,128,133,
HACG01022965	A0A0B6ZQ16	gi|524866300|ref|XP_005089972.1|	5	18.6207	5	16	269.243	128,133,134,
HACG01026090	A0A0B6ZZ25	gi|524866304|ref|XP_005089974.1|	7	23.3108	7	12	134.737	269,
HACG01037431	A0A0B7AW84	gi|524866478|ref|XP_005090060.1|	57	86.0511	57	667	11570.5	8,34,35,36,37,38,39,40,42,43,47,49,73,74,93,94,124,127,129,130,131,134,137,176,183,199,200,201,202,218,219,41,126,142,75,76,90,96,118,220,227,125,100,126,127,128,129,130,131,132,133,196,197,198,199,200,101,
HACG01032272	A0A0B7AES8	gi|524866556|ref|XP_005090099.1|	5	8.82353	5	7	124.013	72,73,
HACG01014492	A0A0B6YYZ2	gi|524866627|ref|XP_005090132.1|	7	34.9345	7	18	110.423	103,105,106,116,119,
HACG01041544	A0A0B7B4Y6	gi|524866780|ref|XP_005090207.1|	6	18.3099	6	14	356.711	73,74,76,224,
HACG01023435	A0A0B6ZRC9	gi|524866912|ref|XP_005090271.1|	9	18.5644	9	48	891.398	71,73,74,76,224,72,143,223,
HACG01002510	A0A0B6Y1G7	gi|524866978|ref|XP_005090304.1|	2	22.8916	2	2	56.89	167,
HACG01040599	A0A0B7B2C3	gi|524867549|ref|XP_005090585.1|	2	10	2	2	59.93	118,280,
HACG01012058	A0A0B6YRS0	gi|524867573|ref|XP_005090597.1|	12	32.3232	12	117	2360.78	59,60,65,66,69,70,79,116,61,78,100,162,176,215,214,
HACG01039373	A0A0B7AZL8	gi|524867613|ref|XP_005090615.1|	4	4.15225	4	8	92.17	194,195,
HACG01039374	A0A0B7AYT6	gi|524867613|ref|XP_005090615.1|	13	14.1865	13	27	392.113	196,197,198,
HACG01031625	A0A0B7AF15	gi|524867792|ref|XP_005090703.1|	10	22.119	10	23	499.064	30,31,32,71,
HACG01038201	A0A0B7AYD5	gi|524868395|ref|XP_005091000.1|	2	6.02679	2	2	53.2	35,102,
HACG01030298	A0A0B7A8Q8	gi|524868522|ref|XP_005091063.1|	11	11.5871	11	19	329.296	85,87,206,207,211,
HACG01017523	A0A0B6Z789	gi|524868787|ref|XP_005091193.1|	2	6.54628	2	2	61.58	89,
HACG01035935	A0A0B7AS43	gi|524869199|ref|XP_005091396.1|	6	21.1864	6	16	265.29	88,89,117,118,125,132,
HACG01024680	A0A0B6ZUN2	gi|524869393|ref|XP_005091491.1|	4	16.8067	4	13	177.596	118,145,146,173,129,
HACG01047713	A0A0B7BMS0	gi|524869485|ref|XP_005091535.1|	9	16.458	9	46	642.497	29,30,31,67,104,205,212,123,206,207,53,114,31,120,137,141,
HACG01038260	A0A0B7AZ25	gi|524869987|ref|XP_005091780.1|	9	62.3853	9	26	473.428	154,155,156,
HACG01037615	A0A0B7AX72	gi|524870028|ref|XP_005091800.1|	5	11.0251	5	5	140.67	29,136,
HACG01021181	A0A0B6ZJL1	gi|524870191|ref|XP_005091881.1|	3	11.2094	3	14	328.246	113,114,117,127,128,129,178,
HACG01049555	A0A0B7BW87	gi|524870300|ref|XP_005091935.1|	4	19.8925	4	7	158.927	123,296,297,298,299,
HACG01044534	A0A0B7BGU4	gi|524870722|ref|XP_005092143.1|	2	10.1626	2	4	82.11	116,138,139,
HACG01032271	A0A0B7AGG2	gi|524870815|ref|XP_005092188.1|	3	10.9091	3	5	117.08	103,104,105,283,
HACG01020278	A0A0B6ZF29	gi|524870833|ref|XP_005092197.1|	7	21.8509	7	11	154.275	78,80,81,
HACG01005165	A0A0B6Y9C2	gi|524870848|ref|XP_005092204.1|	4	6.19112	4	6	143.693	17,212,19,
HACG01049237	A0A0B7BT72	gi|524870886|ref|XP_005092223.1|	5	47.619	5	19	609.469	150,151,242,244,
HACG01015833	A0A0B6Z2C9	gi|524870945|ref|XP_005092251.1|	4	31.8519	4	9	156.821	175,176,
HACG01028495	A0A0B7A5V4	gi|524871066|ref|XP_005092309.1|	2	4.59519	2	2	43.56	79,
HACG01016977	A0A0B6Z630	gi|524871134|ref|XP_005092343.1|	15	40.919	15	171	4821.13	48,82,108,138,220,221,222,76,99,128,
HACG01003261	A0A0B6Y2Q3	gi|524871178|ref|XP_005092365.1|	4	18.2836	4	7	188.74	115,118,
HACG01030377	A0A0B7A988	gi|524871180|ref|XP_005092366.1|	4	27.7778	4	9	127.602	160,349,
HACG01049053	A0A0B7BSG0	gi|524871402|ref|XP_005092474.1|	6	16.6667	6	28	474.533	59,66,70,79,
HACG01049051	A0A0B7BU60	gi|524871402|ref|XP_005092474.1|	13	28.7736	13	43	759.208	61,77,78,226,67,218,219,
HACG01044556	A0A0B7BGH8	gi|524871621|ref|XP_005092582.1|	3	7.87671	4	7	107.184	213,215,
HACG01044568	A0A0B7BEP4	gi|524871621|ref|XP_005092582.1|	3	13.9456	4	4	58.57	215,
HACG01044882	A0A0B7BFS9	gi|524871732|ref|XP_005092637.1|	11	6.38921	11	52	800.869	16,194,195,196,197,198,244,
HACG01017360	A0A0B6Z915	gi|524871774|ref|XP_005092658.1|	4	23.3871	4	8	94.32	105,110,120,
HACG01002370	A0A0B6Y111	gi|524871885|ref|XP_005092713.1|	17	42.6829	17	77	574.582	66,70,77,78,79,90,226,96,219,
HACG01036653	A0A0B7ARN3	gi|524872436|ref|XP_005092980.1|	2	4.7619	2	4	110.66	42,72,45,
HACG01036656	A0A0B7AU52	gi|524872436|ref|XP_005092980.1|	2	6.47182	2	2	126.16	44,
HACG01038229	A0A0B7AZ00	gi|524872616|ref|XP_005093069.1|	11	17.4515	11	27	741.14	17,18,
HACG01020044	A0A0B6ZE82	gi|524872618|ref|XP_005093070.1|	8	11.1748	8	13	120.452	217,218,
HACG01038232	A0A0B7AWS2	gi|524872618|ref|XP_005093070.1|	16	27.7854	16	30	833.83	19,
HACG01013104	A0A0B6YUN0	gi|524872672|ref|XP_005093096.1|	2	18.5841	2	7	99.64	171,177,182,
HACG01045747	A0A0B7BIA3	gi|524872674|ref|XP_005093097.1|	18	44.2724	18	62	1156.35	124,
HACG01042100	A0A0B7B9L4	gi|524872725|ref|XP_005093120.1|	6	16.1209	6	13	252.725	77,79,90,95,
HACG01037808	A0A0B7AUY2	gi|524872775|ref|XP_005093144.1|	4	8.31919	4	7	167.376	217,218,
HACG01026880	A0A0B7A1B0	gi|524872801|ref|XP_005093157.1|	2	8.33333	2	6	82.8667	296,297,
HACG01034122	A0A0B7AK85	gi|524872805|ref|XP_005093159.1|	2	8.95522	2	2	56.05	76,134,
HACG01025991	A0A0B6ZYF1	gi|524872832|ref|XP_005093172.1|	3	8.25	3	12	294.35	90,100,226,227,
HACG01019836	A0A0B6ZFS7	gi|524872846|ref|XP_005093178.1|	3	24.5455	3	15	218.623	154,156,164,183,
HACG01037927	A0A0B7AVW4	gi|524872922|ref|XP_005093216.1|	22	41.6826	22	125	3313.92	34,35,36,38,40,41,42,43,47,76,125,177,118,140,142,75,195,196,197,
HACG01036606	A0A0B7AU19	gi|524872934|ref|XP_005093222.1|	3	22.6519	3	6	133.917	121,122,155,
HACG01049541	A0A0B7BVL0	gi|524873087|ref|XP_005093297.1|	2	5.90406	2	14	202.784	129,135,140,142,143,137,139,141,
HACG01024107	A0A0B6ZRK2	gi|524873169|ref|XP_005093336.1|	12	38.3686	12	26	625.345	124,
HACG01016400	A0A0B6Z6B4	gi|524873315|ref|XP_005093407.1|	5	27.2727	5	8	186.385	107,
HACG01015350	A0A0B6Z3C6	gi|524873464|ref|XP_005093478.1|	2	12.7778	2	2	30.52	102,
HACG01004352	A0A0B6Y4G6	gi|524873600|ref|XP_005093544.1|	8	39.3333	8	23	302.21	160,184,
HACG01018479	A0A0B6Z9R2	gi|524873604|ref|XP_005093546.1|	4	30.9211	4	11	183.678	244,245,
HACG01041556	A0A0B7B7Z3	gi|524873886|ref|XP_005093685.1|	2	3.10078	2	3	88.4167	23,
HACG01005406	A0A0B6Y8V9	gi|524873892|ref|XP_005093688.1|	3	32.6923	3	10	383.09	115,118,119,138,
HACG01038910	A0A0B7B0X8	gi|524873892|ref|XP_005093688.1|	7	31.1828	7	11	398.946	134,
HACG01051909	A0A0B7C2V3	gi|524873894|ref|XP_005093689.1|	2	28.3582	2	4	71.32	119,
HACG01044483	A0A0B7BED8	gi|524874065|ref|XP_005093774.1|	7	25.9259	7	18	334.948	102,232,233,282,
HACG01047775	A0A0B7BR48	gi|524874093|ref|XP_005093787.1|	2	12.1212	2	3	59.1267	163,350,
HACG01019320	A0A0B6ZEM9	gi|524874148|ref|XP_005093814.1|	2	11.0599	2	2	53.76	184,
HACG01043121	A0A0B7B9J2	gi|524874148|ref|XP_005093814.1|	2	6.81818	2	13	125.244	76,118,135,137,152,153,155,156,159,221,
HACG01042778	A0A0B7B8J0	gi|524874171|ref|XP_005093825.1|	5	26.2295	5	11	244.473	105,106,107,
HACG01035200	A0A0B7AQ79	gi|524874190|ref|XP_005093834.1|	2	5.97015	2	2	62.07	100,
HACG01035202	A0A0B7AN70	gi|524874194|ref|XP_005093836.1|	3	8.67209	3	8	167.745	72,73,95,99,
HACG01023713	A0A0B6ZPU8	gi|524874346|ref|XP_005093909.1|	3	18.9655	3	7	92.34	153,154,
HACG01012594	A0A0B6YT90	gi|524874372|ref|XP_005093922.1|	6	13.7536	6	8	107.665	89,
HACG01039459	A0A0B7AZ26	gi|524874374|ref|XP_005093923.1|	4	39.6694	4	8	155.79	103,114,
HACG01041065	A0A0B7B784	gi|524874374|ref|XP_005093923.1|	7	51.5837	14	108	1696.48	104,105,106,115,116,119,138,291,307,
HACG01016638	A0A0B6Z4R6	gi|524874376|ref|XP_005093924.1|	5	71.5909	8	53	1019.23	103,116,104,105,
HACG01025304	A0A0B6ZU66	gi|524874452|ref|XP_005093961.1|	4	20.9302	4	13	276.048	137,139,143,141,
HACG01043460	A0A0B7BDR6	gi|524874655|ref|XP_005094062.1|	7	6.41749	7	31	499.494	8,68,97,102,167,183,36,
HACG01045821	A0A0B7BK36	gi|524874657|ref|XP_005094063.1|	2	2.26757	2	8	192.255	8,97,102,167,209,
HACG01041343	A0A0B7B595	gi|524874769|ref|XP_005094119.1|	9	16.2264	9	19	418.837	20,44,161,156,167,171,203,
HACG01041824	A0A0B7B5R5	gi|524874940|ref|XP_005094202.1|	2	12.2137	2	7	84.5114	244,245,246,
HACG01033064	A0A0B7AG06	gi|524875029|ref|XP_005094246.1|	2	14.6497	2	2	86.01	52,
HACG01006029	A0A0B6Y9Q2	gi|524875029|ref|XP_005094246.1|	3	20.438	3	4	132.06	51,304,
HACG01047291	A0A0B7BP65	gi|524875093|ref|XP_005094277.1|	2	21.4876	2	4	110.98	245,
HACG01027476	A0A0B7A2M2	gi|524875173|ref|XP_005094317.1|	2	4.16667	2	2	59.91	32,
HACG01028046	A0A0B7A4F5	gi|524875207|ref|XP_005094334.1|	4	15.7025	4	6	84.6167	135,
HACG01029963	A0A0B7A7Q9	gi|524875239|ref|XP_005094350.1|	2	5.07099	2	4	81.98	62,222,
HACG01047071	A0A0B7BNN8	gi|524875325|ref|XP_005094393.1|	4	33.3333	4	7	121.997	157,159,161,
HACG01024676	A0A0B6ZUM9	gi|524875329|ref|XP_005094395.1|	2	25.8427	2	4	128.22	180,227,239,
HACG01031047	A0A0B7AB85	gi|524875601|ref|XP_005094526.1|	13	32.4742	21	70	1251.18	22,24,23,
HACG01044549	A0A0B7BDN2	gi|524875601|ref|XP_005094526.1|	25	48.4483	32	197	4018.68	21,22,23,24,25,26,27,
HACG01039936	A0A0B7B3C3	gi|524875666|ref|XP_005094557.1|	3	33.3333	3	4	65.86	119,
HACG01034125	A0A0B7AM63	gi|524875728|ref|XP_005094588.1|	15	41.6031	15	77	828.789	107,108,110,111,112,120,137,140,289,292,
HACG01044164	A0A0B7BCI7	gi|524876098|ref|XP_005094768.1|	7	16.5948	7	22	531.436	220,221,222,
HACG01016248	A0A0B6Z3I2	gi|524876118|ref|XP_005094778.1|	2	10	2	4	111.2	127,134,
HACG01024946	A0A0B6ZVG4	gi|524876391|ref|XP_005094913.1|	11	32.0755	11	45	723.569	125,126,132,128,273,
HACG01033221	A0A0B7AJ41	gi|524876523|ref|XP_005094977.1|	2	21.5686	2	4	68.47	67,
HACG01047741	A0A0B7BQF9	gi|524876523|ref|XP_005094977.1|	2	31.0811	2	11	182.967	77,78,226,
HACG01007055	A0A0B6YEK0	gi|524876523|ref|XP_005094977.1|	3	39.604	4	5	74.31	95,219,
HACG01033222	A0A0B7AHI8	gi|524876523|ref|XP_005094977.1|	5	66.6667	5	15	181.85	78,95,
HACG01027793	A0A0B7A1F8	gi|524876525|ref|XP_005094978.1|	1	13.0081	2	3	58.41	77,
HACG01040856	A0A0B7B5Y6	gi|524876525|ref|XP_005094978.1|	2	13.8393	3	26	467.136	66,77,78,79,
HACG01047235	A0A0B7BPM2	gi|524876525|ref|XP_005094978.1|	2	50.7463	3	9	272.35	65,69,
HACG01047730	A0A0B7BR09	gi|524876525|ref|XP_005094978.1|	3	33.0882	6	13	221.377	77,
HACG01047234	A0A0B7BL93	gi|524876525|ref|XP_005094978.1|	6	52.9412	8	21	242.675	65,69,213,214,215,
HACG01047746	A0A0B7BQG4	gi|524876525|ref|XP_005094978.1|	6	42.1233	11	76	1206.6	61,70,77,78,79,100,226,
HACG01047748	A0A0B7BNS6	gi|524876525|ref|XP_005094978.1|	7	30.292	8	22	343.574	95,100,96,97,
HACG01029611	A0A0B7A912	gi|524876525|ref|XP_005094978.1|	8	29.3011	11	42	764.758	78,79,99,100,
HACG01047238	A0A0B7BMB5	gi|524876525|ref|XP_005094978.1|	11	41.8919	16	83	1709.5	69,75,96,99,100,226,95,214,215,
HACG01033224	A0A0B7AGF2	gi|524876525|ref|XP_005094978.1|	11	44.164	17	149	2174.57	67,95,78,81,227,
HACG01033223	A0A0B7AH15	gi|524876525|ref|XP_005094978.1|	12	39.4322	14	81	1538.8	59,61,65,67,227,60,83,86,87,114,115,125,220,225,215,
HACG01047734	A0A0B7BMT3	gi|524876525|ref|XP_005094978.1|	14	50.4202	18	134	2002.18	61,66,70,77,78,79,90,96,99,100,226,80,218,
HACG01045203	A0A0B7BGH6	gi|524876525|ref|XP_005094978.1|	15	53.7634	19	144	1904.74	61,67,70,77,78,79,90,80,177,219,
HACG01048303	A0A0B7BSN3	gi|524876560|ref|XP_005094995.1|	2	3.27154	2	2	87.09	241,
HACG01036905	A0A0B7AV67	gi|524876601|ref|XP_005095013.1|	4	15.2027	4	8	167.535	129,
HACG01040482	A0A0B7B2U2	gi|524876605|ref|XP_005095015.1|	4	6.59898	4	6	149.63	127,
HACG01018233	A0A0B6Z999	gi|524876618|ref|XP_005095021.1|	2	8.24742	2	3	94.6	113,
HACG01038416	A0A0B7AYY4	gi|524876864|ref|XP_005095141.1|	2	5.58252	2	5	126.45	79,147,148,
HACG01005526	A0A0B6Y989	gi|524877031|ref|XP_005095223.1|	8	33.6601	8	36	162.36	223,247,249,250,232,
HACG01002364	A0A0B6XZ93	gi|524877040|ref|XP_005095227.1|	5	28.9916	5	21	543.984	120,139,140,141,143,
HACG01042344	A0A0B7B787	gi|524877054|ref|XP_005095234.1|	7	27.6364	7	9	144.101	138,167,162,322,
HACG01046759	A0A0B7BJU2	gi|524877098|ref|XP_005095256.1|	2	12.1827	2	4	44.95	241,243,
HACG01016532	A0A0B6Z4V5	gi|524877129|ref|XP_005095271.1|	4	24.3421	4	11	123.005	99,100,160,181,184,
HACG01022814	A0A0B6ZM06	gi|524877261|ref|XP_005095336.1|	11	23.0047	11	40	708.175	63,71,72,73,74,76,77,83,223,
HACG01034913	A0A0B7ALN4	gi|524877265|ref|XP_005095338.1|	3	7.78589	3	6	101.19	44,71,132,
HACG01017516	A0A0B6Z8V8	gi|524877372|ref|XP_005095389.1|	3	20.202	3	15	126.463	167,241,243,244,
HACG01029717	A0A0B7A7F1	gi|524877675|ref|XP_005095535.1|	4	5.99022	4	16	336.925	102,114,115,116,245,
HACG01042742	A0A0B7B9M1	gi|524877853|ref|XP_005095623.1|	2	9.94624	3	11	290.539	82,83,99,
HACG01020827	A0A0B6ZH02	gi|524877853|ref|XP_005095623.1|	3	23.4177	3	43	726.342	61,66,70,77,78,79,80,82,83,90,95,97,100,
HACG01029099	A0A0B7A4W0	gi|524878165|ref|XP_005095772.1|	2	5.30303	2	3	96.8233	71,222,
HACG01044845	A0A0B7BHQ6	gi|524878388|ref|XP_005095881.1|	9	16.7641	9	19	363.692	33,191,192,193,
HACG01023895	A0A0B6ZSN3	gi|524878973|ref|XP_005096166.1|	14	39.0029	14	124	2876.89	121,122,124,125,126,127,128,130,131,132,133,134,135,136,137,140,143,158,164,237,141,176,256,257,
HACG01027045	A0A0B7A1U8	gi|524879223|ref|XP_005096289.1|	10	41.6382	10	46	1025.63	113,114,270,
HACG01038992	A0A0B7AZ07	gi|524879388|ref|XP_005096370.1|	10	32.8076	10	59	1471.61	231,232,233,234,235,236,237,
HACG01026781	A0A0B7A0J7	gi|524879487|ref|XP_005096418.1|	3	17.1598	3	4	66.4	166,
HACG01011745	A0A0B6YS56	gi|524879594|ref|XP_005096471.1|	2	6.08108	2	3	43.23	117,
HACG01035886	A0A0B7APG1	gi|524879616|ref|XP_005096482.1|	5	18.0812	5	7	154.277	103,114,
HACG01043422	A0A0B7BBM0	gi|524879771|ref|XP_005096557.1|	3	4.2796	3	4	106.33	17,19,
HACG01025058	A0A0B6ZTP0	gi|524879801|ref|XP_005096572.1|	2	6.28931	2	4	74.81	58,225,
HACG01019512	A0A0B6ZD40	gi|524879821|ref|XP_005096582.1|	5	24.0506	5	14	269.079	114,115,
HACG01012222	A0A0B6YSI6	gi|524879821|ref|XP_005096582.1|	6	27.8689	6	15	463.133	114,115,
HACG01011891	A0A0B6YSI7	gi|524879933|ref|XP_005096636.1|	5	19.1781	5	8	109.235	107,
HACG01045293	A0A0B7BGQ8	gi|524879957|ref|XP_005096647.1|	4	16.7808	4	10	222.79	230,231,234,235,236,
HACG01006388	A0A0B6YAV9	gi|524880082|ref|XP_005096709.1|	3	7.34694	3	7	221.959	123,
HACG01012153	A0A0B6YS36	gi|524880339|ref|XP_005096834.1|	5	16.3424	5	8	163.345	134,
HACG01039118	A0A0B7AZ06	gi|524880725|ref|XP_005097023.1|	8	36.0595	8	28	508.819	116,119,
HACG01019667	A0A0B6ZDM9	gi|524880840|ref|XP_005097078.1|	13	40.4523	13	46	1013.66	79,90,99,100,226,227,
HACG01033252	A0A0B7AHL7	gi|524880906|ref|XP_005097111.1|	5	19.8529	5	13	279.012	134,
HACG01043059	A0A0B7B9D3	gi|524880980|ref|XP_005097146.1|	6	18.7668	6	18	217.978	162,230,231,232,233,
HACG01030131	A0A0B7AAG8	gi|524881119|ref|XP_005097215.1|	6	12.5645	6	12	139.847	102,103,113,117,119,
HACG01016720	A0A0B6Z799	gi|524881344|ref|XP_005097324.1|	5	17.608	5	10	191.47	115,118,
HACG01002482	A0A0B6XZ62	gi|524881385|ref|XP_005097344.1|	6	34	6	12	227.493	170,
HACG01023486	A0A0B6ZRA1	gi|524881413|ref|XP_005097358.1|	2	7.79817	2	2	44.39	295,
HACG01042237	A0A0B7B865	gi|524881557|ref|XP_005097429.1|	3	11.4173	3	4	84.61	103,108,
HACG01042234	A0A0B7B6Z4	gi|524881557|ref|XP_005097429.1|	6	28.7402	6	33	739.956	102,104,110,107,111,112,140,228,229,
HACG01044082	A0A0B7BDM3	gi|524881606|ref|XP_005097453.1|	15	40.1786	15	23	284.03	61,67,78,122,178,
HACG01041623	A0A0B7B664	gi|524881651|ref|XP_005097475.1|	6	12.1019	6	12	230.117	220,222,221,
HACG01020950	A0A0B6ZJ74	gi|524881663|ref|XP_005097481.1|	3	12.9151	3	3	71.17	89,
HACG01042706	A0A0B7BBA9	gi|524881663|ref|XP_005097481.1|	3	10.6618	3	4	64.69	89,
HACG01037631	A0A0B7AWT8	gi|524881729|ref|XP_005097514.1|	3	6.72727	3	7	154.889	30,31,32,33,
HACG01020102	A0A0B6ZEZ5	gi|524881743|ref|XP_005097521.1|	7	33.9869	7	75	1275.41	153,154,155,156,159,240,
HACG01038701	A0A0B7AZV1	gi|524881799|ref|XP_005097549.1|	3	14.0625	3	4	48.22	184,
HACG01030319	A0A0B7A872	gi|524881811|ref|XP_005097555.1|	12	35.0299	12	118	2051.46	19,67,70,76,77,78,79,90,95,96,219,220,221,200,211,223,226,224,227,229,
HACG01031183	A0A0B7ABC6	gi|524881948|ref|XP_005097620.1|	3	5.34351	3	8	266.82	226,227,237,
HACG01048432	A0A0B7BQZ8	gi|524881984|ref|XP_005097638.1|	8	63.9706	8	60	1510.34	231,241,243,244,245,242,334,339,340,
HACG01026907	A0A0B6ZZK4	gi|524881984|ref|XP_005097638.1|	9	56.4286	9	24	326.565	245,246,
HACG01023070	A0A0B6ZQF9	gi|524882120|ref|XP_005097705.1|	5	16.4134	5	11	175.766	86,167,
HACG01025715	A0A0B6ZXV2	gi|524882305|ref|XP_005097797.1|	3	21.5385	3	9	266.123	145,170,176,185,
HACG01002179	A0A0B6XYR0	gi|524882420|ref|XP_005097854.1|	3	7.68	4	23	462.322	25,26,27,31,75,30,
HACG01036522	A0A0B7AS20	gi|524882420|ref|XP_005097854.1|	6	38.4259	7	38	845.875	25,26,27,218,30,222,
HACG01036520	A0A0B7AU14	gi|524882422|ref|XP_005097855.1|	10	35.061	10	75	1586.76	25,26,27,30,31,95,96,218,122,71,75,
HACG01038707	A0A0B7AXQ6	gi|524882436|ref|XP_005097862.1|	2	4.6875	2	9	207.389	39,40,47,41,
HACG01023737	A0A0B6ZQD9	gi|524882460|ref|XP_005097873.1|	2	19.4805	2	3	72.3967	178,
HACG01042971	A0A0B7BC18	gi|524882460|ref|XP_005097873.1|	3	28.1879	3	16	384.555	156,157,159,161,167,240,
HACG01038340	A0A0B7AZ95	gi|524882484|ref|XP_005097885.1|	6	18.8679	6	20	328.53	88,89,
HACG01031944	A0A0B7ACQ9	gi|524882484|ref|XP_005097885.1|	7	18.3784	7	12	126.77	87,119,251,
HACG01005798	A0A0B6Y955	gi|524882717|ref|XP_005097997.1|	7	21.875	7	29	522.657	88,89,103,237,104,
HACG01030327	A0A0B7A931	gi|524882748|ref|XP_005098012.1|	3	7.11207	3	4	110.11	51,75,
HACG01030332	A0A0B7A937	gi|524882748|ref|XP_005098012.1|	13	26.7281	18	67	900.57	46,108,121,161,108,111,113,109,116,
HACG01026178	A0A0B6ZWS4	gi|524882748|ref|XP_005098012.1|	21	38.1173	29	90	1701.48	20,53,122,144,102,103,94,99,105,110,111,114,115,141,142,144,140,
HACG01012283	A0A0B6YSE3	gi|524882774|ref|XP_005098023.1|	5	20.3008	5	7	146.26	16,229,
HACG01043370	A0A0B7BDH8	gi|524882922|ref|XP_005098097.1|	8	31.1526	8	28	632.606	66,70,77,78,
HACG01042664	A0A0B7B882	gi|524882968|ref|XP_005098119.1|	2	29.3333	2	6	148.397	20,21,
HACG01042659	A0A0B7B879	gi|524882968|ref|XP_005098119.1|	18	35.6137	18	59	1677.84	20,21,
HACG01031424	A0A0B7ABA2	gi|524883188|ref|XP_005098227.1|	2	11.8343	2	3	88.5967	244,
HACG01029475	A0A0B7A8M8	gi|524883288|ref|XP_005098277.1|	24	42.2371	24	97	1423.92	62,217,218,219,65,
HACG01047578	A0A0B7BQ40	gi|524883534|ref|XP_005098394.1|	5	33.5664	5	43	1018.22	153,154,155,156,157,240,
HACG01046100	A0A0B7BLJ8	gi|524883534|ref|XP_005098394.1|	6	40.8451	6	28	408.731	153,154,156,159,171,
HACG01037246	A0A0B7AVR7	gi|524883540|ref|XP_005098397.1|	7	29.2079	7	11	281.66	142,320,
HACG01034546	A0A0B7AN45	gi|524883558|ref|XP_005098406.1|	2	4.74041	2	2	59.99	75,
HACG01028172	A0A0B7A351	gi|524883622|ref|XP_005098438.1|	14	32.3829	14	26	576.128	41,42,
HACG01030702	A0A0B7AA82	gi|524883626|ref|XP_005098440.1|	6	51.0638	6	48	1208.94	153,154,156,159,185,242,155,158,162,170,175,176,
HACG01021850	A0A0B6ZLU3	gi|524883640|ref|XP_005098447.1|	4	11.0368	4	20	422.96	84,85,86,87,88,253,
HACG01020264	A0A0B6ZEU0	gi|524883762|ref|XP_005098507.1|	4	12.7148	4	5	87.87	219,
HACG01018638	A0A0B6ZA92	gi|524883990|ref|XP_005098620.1|	19	56.0241	19	128	2364.11	61,67,77,78,79,80,90,95,100,227,87,81,82,97,121,125,134,226,228,218,226,219,225,220,
HACG01019518	A0A0B6ZCY8	gi|524884099|ref|XP_005098673.1|	4	5.84239	4	5	92.7	44,213,240,
HACG01020693	A0A0B6ZG89	gi|524884444|ref|XP_005098842.1|	2	10.2439	2	5	79.48	101,102,
HACG01024236	A0A0B6ZTD9	gi|524884503|ref|XP_005098871.1|	2	15.2866	2	2	57.99	170,
HACG01005206	A0A0B6Y8C3	gi|524884550|ref|XP_005098894.1|	4	11.8694	4	6	98.13	90,100,229,
HACG01013182	A0A0B6YVC0	gi|524884630|ref|XP_005098934.1|	9	32.3077	9	47	1055.02	67,77,78,83,84,127,80,82,97,
HACG01032633	A0A0B7AFG9	gi|524884737|ref|XP_005098987.1|	18	37.8753	18	79	1549	61,135,136,226,227,100,129,241,
HACG01022531	A0A0B6ZNH1	gi|524884830|ref|XP_005099031.1|	2	6.19946	2	2	86.28	33,
HACG01017026	A0A0B6Z7I4	gi|524884878|ref|XP_005099053.1|	10	39.4309	10	118	1913.13	103,104,105,106,119,138,116,
HACG01049606	A0A0B7BVV6	gi|524884884|ref|XP_005099056.1|	3	17.2973	3	4	53.49	146,
HACG01044248	A0A0B7BDQ0	gi|524884921|ref|XP_005099073.1|	27	44.5434	27	576	11029.2	2,5,8,12,16,17,19,20,21,25,26,29,30,44,47,48,49,50,51,53,54,68,202,208,209,210,212,217,218,219,220,221,222,223,224,225,226,227,229,233,234,237,238,239,240,241,242,243,244,248,252,3,7,9,10,13,18,22,23,24,27,28,31,32,34,35,36,42,43,62,71,85,97,100,102,103,105,109,121,142,150,151,153,154,155,156,157,160,161,167,169,177,182,190,228,232,236,245,246,247,249,250,251,178,231,235,104,46,152,201,205,206,20…
HACG01048525	A0A0B7BTA4	gi|524885143|ref|XP_005099182.1|	3	7.58294	3	4	62.33	220,222,
HACG01031021	A0A0B7ACZ7	gi|524885197|ref|XP_005099209.1|	2	7.87671	2	2	43.86	89,
HACG01030474	A0A0B7A8M4	gi|524885272|ref|XP_005099245.1|	3	27.9412	3	27	903.714	153,154,245,155,
HACG01042059	A0A0B7B6H7	gi|524885355|ref|XP_005099286.1|	2	5.81717	2	3	64.0533	67,
HACG01024398	A0A0B6ZRQ2	gi|524885520|ref|XP_005099366.1|	23	79.6178	23	291	2963.01	97,151,167,150,152,164,245,168,232,236,332,333,334,335,339,
HACG01019634	A0A0B6ZD53	gi|524885581|ref|XP_005099396.1|	6	29.9065	6	13	138.515	145,184,185,
HACG01034464	A0A0B7AJZ1	gi|524885593|ref|XP_005099402.1|	1	14.5299	3	10	348.78	119,140,
HACG01034463	A0A0B7AKC6	gi|524885593|ref|XP_005099402.1|	3	14.5299	3	53	1426.34	102,107,110,112,119,120,125,126,137,140,103,104,105,167,
HACG01026541	A0A0B7A005	gi|524885601|ref|XP_005099406.1|	28	39.1705	28	180	2922.51	8,42,43,71,75,76,77,78,94,125,126,128,129,130,132,133,134,136,137,184,224,225,234,237,241,
HACG01002182	A0A0B6XYA1	gi|524885619|ref|XP_005099415.1|	5	20	5	18	350.378	116,119,135,136,
HACG01040760	A0A0B7B682	gi|524885703|ref|XP_005099456.1|	2	3.48101	2	6	59.0333	107,109,
HACG01019434	A0A0B6ZCI2	gi|524885795|ref|XP_005099501.1|	9	63.0682	12	145	2592.11	46,56,57,62,63,137,143,137,327,212,
HACG01023784	A0A0B6ZPT3	gi|524885795|ref|XP_005099501.1|	14	51.2422	22	215	4235.91	56,57,63,137,224,248,252,62,
HACG01019777	A0A0B6ZDX9	gi|524885821|ref|XP_005099514.1|	10	32.7402	10	15	275.827	87,252,
HACG01023843	A0A0B6ZQ55	gi|524885854|ref|XP_005099530.1|	8	36.4865	8	141	2899.03	5,52,55,74,75,76,95,123,124,125,127,129,132,134,136,137,138,139,142,143,144,145,146,147,162,220,221,71,82,83,91,94,96,97,100,114,115,117,135,140,167,176,190,191,222,224,248,121,128,183,187,189,225,
HACG01025524	A0A0B6ZUU6	gi|524885898|ref|XP_005099550.1|	20	33.5793	20	44	720.86	30,31,32,189,
HACG01037970	A0A0B7AY55	gi|524885955|ref|XP_005099578.1|	2	4.69208	2	3	55.19	78,79,
HACG01023929	A0A0B6ZQ69	gi|524886181|ref|XP_005099688.1|	5	42.9752	9	52	1391.01	240,
HACG01034077	A0A0B7AK60	gi|524886261|ref|XP_005099727.1|	2	3.05585	2	2	85.15	8,
HACG01034068	A0A0B7AJF8	gi|524886261|ref|XP_005099727.1|	16	18.4584	16	100	1692.76	29,31,46,30,208,204,205,207,222,62,92,124,193,195,197,206,194,210,82,83,130,100,101,104,190,191,196,209,
HACG01046906	A0A0B7BN42	gi|524886263|ref|XP_005099728.1|	2	10.6667	2	5	78.71	79,81,202,212,
HACG01030660	A0A0B7AC58	gi|524886263|ref|XP_005099728.1|	5	10.5839	5	8	158.145	8,29,103,205,212,
HACG01020253	A0A0B6ZF05	gi|524886285|ref|XP_005099739.1|	4	42.1687	4	13	119.529	232,233,234,235,236,
HACG01005669	A0A0B6Y8R1	gi|524886289|ref|XP_005099741.1|	8	24.4792	8	18	128.036	102,103,282,
HACG01042644	A0A0B7B867	gi|524886299|ref|XP_005099746.1|	5	19.2469	5	23	437.195	119,135,136,138,139,
HACG01050376	A0A0B7BXY3	gi|524886483|ref|XP_005099835.1|	4	29.5082	4	14	181.559	85,87,
HACG01011292	A0A0B6YPS1	gi|524886483|ref|XP_005099835.1|	5	32.0312	5	13	195.966	85,87,
HACG01046014	A0A0B7BHR3	gi|524886540|ref|XP_005099863.1|	9	31.25	9	21	619.552	88,89,
HACG01005621	A0A0B6Y9I8	gi|524886568|ref|XP_005099877.1|	3	24.5763	3	7	78.6486	184,
HACG01049684	A0A0B7BTM1	gi|524886570|ref|XP_005099878.1|	5	42.9577	5	28	835.074	170,175,176,185,
HACG01034151	A0A0B7AM21	gi|524886658|ref|XP_005099922.1|	9	21.9072	9	27	386.646	61,67,103,
HACG01011327	A0A0B6YPV7	gi|524886662|ref|XP_005099924.1|	2	5.93472	2	2	47.54	236,
HACG01041003	A0A0B7B6C7	gi|524886695|ref|XP_005099940.1|	16	42.5532	16	91	1538.6	127,133,128,137,275,
HACG01039798	A0A0B7B0V2	gi|524886707|ref|XP_005099946.1|	2	5.27638	2	7	150.939	75,76,127,
HACG01043212	A0A0B7BB06	gi|524886817|ref|XP_005100000.1|	22	42.9975	22	108	2123.39	19,35,66,70,75,77,79,90,95,100,186,217,218,219,226,227,96,97,102,156,221,222,223,
HACG01046321	A0A0B7BLF2	gi|524886950|ref|XP_005100065.1|	6	14.7239	6	12	182.907	86,114,249,
HACG01025526	A0A0B6ZVN1	gi|524886963|ref|XP_005100071.1|	5	6.22914	5	6	117.893	135,209,
HACG01027287	A0A0B7A0N0	gi|524887258|ref|XP_005100217.1|	6	16.0784	6	11	177.769	79,90,96,226,
HACG01045421	A0A0B7BIZ6	gi|524887319|ref|XP_005100247.1|	10	25.5556	10	32	592.114	66,70,79,227,142,
HACG01022358	A0A0B6ZL17	gi|524887384|ref|XP_005100278.1|	2	2.85307	2	2	39.81	10,
HACG01035921	A0A0B7AP15	gi|524887465|ref|XP_005100318.1|	2	30.137	2	4	103.03	30,
HACG01035922	A0A0B7AQA9	gi|524887465|ref|XP_005100318.1|	2	18.2353	2	4	116.87	30,
HACG01045393	A0A0B7BH12	gi|524887498|ref|XP_005100334.1|	2	4.24242	2	2	56.83	32,
HACG01034869	A0A0B7AL15	gi|524887580|ref|XP_005100374.1|	2	4.98615	2	3	72.3533	30,31,
HACG01019871	A0A0B6ZFV9	gi|524887592|ref|XP_005100380.1|	25	52.1851	25	143	2627.44	46,55,56,57,62,63,71,224,52,74,156,222,209,211,
HACG01023461	A0A0B6ZR72	gi|524887834|ref|XP_005100500.1|	8	50	8	30	563.037	158,
HACG01032945	A0A0B7AIQ0	gi|524887883|ref|XP_005100524.1|	8	36.7965	8	20	279.59	116,119,138,
HACG01037545	A0A0B7AWW6	gi|524888067|ref|XP_005100610.1|	6	5.66426	6	23	240.588	186,190,193,189,191,192,194,195,196,197,
HACG01028428	A0A0B7A399	gi|524888229|ref|XP_005100690.1|	5	7.72472	5	10	297.37	59,66,65,
HACG01024147	A0A0B6ZRM6	gi|524888237|ref|XP_005100694.1|	3	22.619	3	3	104.703	245,
HACG01040051	A0A0B7B3P8	gi|524888358|ref|XP_005100750.1|	36	61.8474	36	154	3335.47	30,31,32,129,120,121,189,190,
HACG01019961	A0A0B6ZG48	gi|524888414|ref|XP_005100778.1|	7	33.1984	7	20	255.73	104,105,106,
HACG01046337	A0A0B7BJW5	gi|524888508|ref|XP_005100824.1|	16	18.227	41	64	994.27	3,193,37,158,
HACG01046336	A0A0B7BLG3	gi|524888508|ref|XP_005100824.1|	60	38.3533	78	595	9831.38	2,5,17,18,71,192,194,195,196,197,210,191,211,4,25,26,34,44,134,186,187,189,193,198,208,212,222,27,46,67,102,114,12,21,20,40,98,223,199,204,205,206,207,209,201,203,200,228,229,234,235,232,
HACG01037465	A0A0B7AUN9	gi|524888539|ref|XP_005100839.1|	4	8.58779	4	6	101.953	68,220,222,
HACG01033049	A0A0B7AJ19	gi|524889096|ref|XP_005101109.1|	3	18.1208	3	9	102.208	154,155,157,
HACG01030425	A0A0B7ABD8	gi|524889104|ref|XP_005101113.1|	2	5.15222	2	2	64.84	51,
HACG01026348	A0A0B6ZX61	gi|524889251|ref|XP_005101186.1|	5	26.9231	5	17	541.849	135,138,139,
HACG01028544	A0A0B7A3A1	gi|524889396|ref|XP_005101256.1|	9	31.7919	9	22	357.489	71,72,74,76,224,
HACG01018152	A0A0B6Z9I6	gi|524889482|ref|XP_005101296.1|	6	12.0098	6	16	328.942	12,199,200,205,212,18,19,28,
HACG01047429	A0A0B7BLU0	gi|524889526|ref|XP_005101318.1|	19	33.264	19	77	1281.22	62,68,222,208,
HACG01012855	A0A0B6YW55	gi|524889720|ref|XP_005101414.1|	6	33.7302	6	16	330.525	105,116,106,108,119,138,
HACG01049511	A0A0B7BVH8	gi|524889992|ref|XP_005101546.1|	2	10	2	2	74.9	143,
HACG01029152	A0A0B7A5V9	gi|524889992|ref|XP_005101546.1|	3	42.7083	3	13	404.585	114,115,118,129,
HACG01029159	A0A0B7A502	gi|524889992|ref|XP_005101546.1|	6	34.2105	6	21	775.987	114,115,118,129,134,
HACG01026656	A0A0B7A0A0	gi|524890176|ref|XP_005101637.1|	8	18.8324	8	11	167.448	102,103,136,156,
HACG01043147	A0A0B7BAV6	gi|524890376|ref|XP_005101735.1|	2	7.25806	2	2	54.45	16,
HACG01032864	A0A0B7AFC7	gi|524890561|ref|XP_005101826.1|	2	5.49451	2	5	170.54	79,226,
HACG01044966	A0A0B7BHM8	gi|524890599|ref|XP_005101843.1|	13	30.1205	13	26	340.625	77,78,219,
HACG01002033	A0A0B6XYH1	gi|524890653|ref|XP_005101870.1|	2	11.0599	2	3	97.6967	245,
HACG01034211	A0A0B7AJA0	gi|524890683|ref|XP_005101885.1|	4	3.16403	4	5	77.75	67,204,
HACG01041509	A0A0B7B4U6	gi|524890724|ref|XP_005101905.1|	2	60	18	38	462.506	128,
HACG01033928	A0A0B7AIW3	gi|524890794|ref|XP_005101939.1|	2	11.6071	2	2	84.95	143,
HACG01019579	A0A0B6ZD19	gi|524891178|ref|XP_005102125.1|	5	17.4603	5	16	202.945	113,114,115,117,127,
HACG01033336	A0A0B7AJI0	gi|524891306|ref|XP_005102188.1|	10	34.9206	10	40	722.915	102,103,110,111,112,107,287,
HACG01005477	A0A0B6Y7L8	gi|524891426|ref|XP_005102246.1|	2	5.98802	2	2	58.24	93,
HACG01031369	A0A0B7AB43	gi|524891426|ref|XP_005102246.1|	9	28.9398	9	52	1517.4	71,75,79,
HACG01020713	A0A0B6ZGA6	gi|524891574|ref|XP_005102320.1|	2	12.2995	2	2	76.71	122,
HACG01018589	A0A0B6ZA53	gi|524891584|ref|XP_005102325.1|	14	36.1757	14	79	1813.46	79,226,90,96,100,227,97,222,
HACG01035715	A0A0B7ARP3	gi|524891634|ref|XP_005102350.1|	5	15.7895	5	7	115.4	267,
HACG01045708	A0A0B7BHZ8	gi|524891741|ref|XP_005102403.1|	3	7.7821	3	6	82.03	82,226,234,235,162,
HACG01002070	A0A0B6Y0C0	gi|524891844|ref|XP_005102454.1|	7	23.0769	7	10	103.65	86,249,
HACG01049671	A0A0B7BW09	gi|524892173|ref|XP_005102616.1|	4	15.0327	4	10	176.91	131,132,237,
HACG01016971	A0A0B6Z7B9	gi|524892281|ref|XP_005102670.1|	4	3.73737	4	14	284.877	71,224,74,76,220,221,222,
HACG01035743	A0A0B7ANJ2	gi|524892285|ref|XP_005102672.1|	2	4.5738	2	3	72.45	73,
HACG01032064	A0A0B7AD66	gi|524892341|ref|XP_005102699.1|	5	22.179	7	33	288.677	49,101,102,234,236,117,128,237,235,
HACG01003478	A0A0B6Y2K2	gi|524892640|ref|XP_005102846.1|	6	43.75	6	13	253.066	153,154,
HACG01034278	A0A0B7AJW7	gi|524892644|ref|XP_005102848.1|	9	44	9	124	3498.88	59,61,65,66,67,70,77,78,79,100,227,90,96,99,226,216,
HACG01031475	A0A0B7AEG1	gi|524892819|ref|XP_005102934.1|	5	10.2473	5	6	117.867	22,23,126,162,
HACG01026435	A0A0B6ZZZ6	gi|524892924|ref|XP_005102985.1|	23	49.884	23	106	1768.35	11,12,17,30,42,43,50,51,52,55,75,199,205,206,210,212,217,218,219,220,223,225,49,58,64,66,221,84,85,86,88,89,87,92,114,
HACG01022483	A0A0B6ZLF6	gi|524892967|ref|XP_005103005.1|	7	46.798	7	43	616.223	137,145,149,160,170,176,178,159,162,166,175,185,
HACG01031847	A0A0B7ADI2	gi|524893098|ref|XP_005103069.1|	2	17.0732	2	8	208.45	166,176,
HACG01041843	A0A0B7B6P2	gi|524893098|ref|XP_005103069.1|	5	31.0127	5	23	251.485	160,163,164,169,183,
HACG01038983	A0A0B7AYI7	gi|524893352|ref|XP_005103192.1|	9	27.6119	9	20	430.27	120,126,141,314,
HACG01028509	A0A0B7A359	gi|524893405|ref|XP_005103218.1|	2	7.66551	2	3	100.81	115,118,
HACG01020335	A0A0B6ZHG3	gi|524893468|ref|XP_005103247.1|	3	22.7545	3	4	110.17	149,
HACG01035185	A0A0B7AQ67	gi|524893572|ref|XP_005103295.1|	2	5.06024	2	5	90.7	71,74,73,96,
HACG01041889	A0A0B7B5X0	gi|524893673|ref|XP_005103345.1|	8	14.7157	8	14	307.796	20,21,
HACG01006397	A0A0B6YA88	gi|524893715|ref|XP_005103366.1|	18	60.733	18	103	563.13	144,145,326,
HACG01029120	A0A0B7A7P3	gi|524893741|ref|XP_005103379.1|	2	14.7929	2	2	55.81	153,
HACG01026942	A0A0B6ZZP8	gi|524893793|ref|XP_005103405.1|	5	8.62385	5	8	244.42	116,140,
HACG01037278	A0A0B7ATF4	gi|524893900|ref|XP_005103458.1|	2	3.75235	2	3	61.7667	35,198,
HACG01037279	A0A0B7ASY0	gi|524893900|ref|XP_005103458.1|	2	3.57815	2	3	65.0567	47,176,220,
HACG01041866	A0A0B7B8S4	gi|524894013|ref|XP_005103514.1|	6	14.447	6	15	345.213	61,67,68,71,108,224,
HACG01040079	A0A0B7B0U6	gi|524894261|ref|XP_005103632.1|	5	4.8336	5	6	157.123	1,124,177,
HACG01019597	A0A0B6ZDH2	gi|524894502|ref|XP_005103748.1|	36	54.1522	39	307	6302.63	34,35,36,39,40,41,42,43,47,129,136,153,204,206,207,212,221,222,243,213,50,100,118,122,134,137,148,191,210,211,245,167,101,131,132,133,148,200,201,202,
HACG01034593	A0A0B7AKU8	gi|524894544|ref|XP_005103769.1|	7	32.7354	7	8	132	116,118,311,
HACG01033587	A0A0B7AIR7	gi|524894608|ref|XP_005103800.1|	3	4.73934	3	6	139.243	89,113,
HACG01035365	A0A0B7AQM9	gi|524894650|ref|XP_005103820.1|	2	9.0604	2	3	94.4667	108,117,
HACG01028511	A0A0B7A5S0	gi|524894778|ref|XP_005103881.1|	6	13.3891	6	10	173.96	56,57,224,
HACG01026277	A0A0B6ZXS1	gi|524894780|ref|XP_005103882.1|	2	3.80435	2	2	54.93	234,235,
HACG01032953	A0A0B7AGA3	gi|524894818|ref|XP_005103900.1|	5	24.8521	6	26	125.885	147,
HACG01035798	A0A0B7AP93	gi|524894818|ref|XP_005103900.1|	10	47.929	11	88	1016.04	147,148,149,330,331,
HACG01049715	A0A0B7BWN9	gi|524895031|ref|XP_005104004.1|	4	9.36255	4	6	109.427	44,218,
HACG01047290	A0A0B7BPR3	gi|524895123|ref|XP_005104049.1|	7	39.899	7	10	250.42	145,
HACG01002012	A0A0B6XXU8	gi|524895342|ref|XP_005104156.1|	12	29.8387	12	23	591.388	65,75,213,
HACG01024673	A0A0B6ZSM7	gi|524895469|ref|XP_005104217.1|	4	13.4276	4	7	96.89	89,132,
HACG01047720	A0A0B7BR00	gi|524895637|ref|XP_005104300.1|	3	11.7845	3	11	244.808	129,134,
HACG01031276	A0A0B7ADM8	gi|524895639|ref|XP_005104301.1|	5	19.3103	5	6	116.007	234,235,
HACG01028273	A0A0B7A2V3	gi|524895699|ref|XP_005104331.1|	2	4.41501	2	2	43.37	79,
HACG01031072	A0A0B7ABD5	gi|524895745|ref|XP_005104354.1|	17	45.5823	21	222	4906.1	8,63,64,70,78,79,100,167,186,187,189,191,192,193,205,207,211,212,97,188,190,27,225,47,118,129,134,135,136,199,200,204,206,176,202,203,208,245,276,
HACG01031079	A0A0B7AAF6	gi|524895745|ref|XP_005104354.1|	18	46.0362	35	249	5457.12	56,57,63,167,191,207,186,190,
HACG01042323	A0A0B7B836	gi|524895745|ref|XP_005104354.1|	22	28.6722	24	96	2060.24	4,136,5,52,55,58,59,60,61,67,86,109,114,103,20,50,68,
HACG01042325	A0A0B7BAQ7	gi|524895745|ref|XP_005104354.1|	24	39.5372	40	301	5740.25	2,3,7,8,12,268,22,23,194,196,197,198,204,205,206,207,167,62,69,29,65,88,89,104,105,106,116,66,156,218,237,
HACG01031077	A0A0B7ABE1	gi|524895745|ref|XP_005104354.1|	27	54.7091	38	556	11669.9	8,16,28,46,52,53,54,55,56,57,59,61,62,64,65,69,71,72,75,88,89,113,114,115,116,119,121,127,129,134,138,139,140,142,147,187,188,189,192,193,194,195,196,197,198,201,202,203,204,205,206,208,209,224,97,229,103,74,
HACG01026835	A0A0B7A165	gi|524895893|ref|XP_005104427.1|	7	12.2186	7	16	393.498	22,25,26,
HACG01030039	A0A0B7A7F9	gi|524896048|ref|XP_005104503.1|	2	12.1212	2	3	47.9967	75,220,
HACG01030311	A0A0B7AAX2	gi|524896189|ref|XP_005104572.1|	2	4.85437	2	2	48.74	120,161,
HACG01039089	A0A0B7AY89	gi|524896250|ref|XP_005104602.1|	10	39.9293	10	60	977.553	125,126,132,128,237,
HACG01046673	A0A0B7BKS0	gi|524896407|ref|XP_005104678.1|	8	31.6129	8	30	239.597	154,155,156,346,
HACG01029795	A0A0B7A9K1	gi|524896457|ref|XP_005104703.1|	10	36.6667	10	30	450.627	121,122,123,316,318,
HACG01022642	A0A0B6ZM97	gi|524896519|ref|XP_005104733.1|	4	23.1373	6	15	152.613	101,102,
HACG01025121	A0A0B6ZVZ8	gi|524896519|ref|XP_005104733.1|	7	33.7255	9	24	430.353	101,
HACG01049383	A0A0B7BSN5	gi|524896597|ref|XP_005104771.1|	2	10.6996	2	2	74.14	102,
HACG01012037	A0A0B6YRY8	gi|524896719|ref|XP_005104831.1|	2	25.4902	2	5	139.21	107,111,
HACG01012038	A0A0B6YRQ3	gi|524896719|ref|XP_005104831.1|	2	15.0794	2	2	44.19	107,
HACG01002165	A0A0B6Y0J4	gi|524896746|ref|XP_005104844.1|	3	22.4638	3	6	145.547	156,185,240,
HACG01047823	A0A0B7BN15	gi|524896814|ref|XP_005104878.1|	19	15.572	19	61	675.55	50,192,194,195,250,125,127,128,189,190,191,193,196,197,
HACG01035846	A0A0B7ARU7	gi|524896814|ref|XP_005104878.1|	23	32.3925	23	136	1277.73	17,202,203,204,205,133,19,190,200,207,201,209,218,136,132,
HACG01047813	A0A0B7BNY8	gi|524896814|ref|XP_005104878.1|	35	17.1499	35	128	1272.76	189,190,192,194,195,196,197,198,204,202,203,205,193,206,211,
HACG01029909	A0A0B7A713	gi|524896868|ref|XP_005104905.1|	4	17.7419	4	5	151.17	88,
HACG01017493	A0A0B6Z757	gi|524896874|ref|XP_005104908.1|	8	28.8	8	52	694.061	144,145,
HACG01044729	A0A0B7BE84	gi|524897390|ref|XP_005105156.1|	2	22.8571	2	2	40.21	171,
HACG01040386	A0A0B7B4N1	gi|524897999|ref|XP_005105454.1|	7	25.6831	7	16	229.96	102,103,147,
HACG01022806	A0A0B6ZP87	gi|524897999|ref|XP_005105454.1|	8	25.5495	8	34	677.788	58,64,225,148,63,186,
HACG01026591	A0A0B7A055	gi|524898060|ref|XP_005105484.1|	2	6.70241	2	2	71.04	50,126,
HACG01016607	A0A0B6Z548	gi|524898165|ref|XP_005105535.1|	3	6.83962	3	3	74.6433	74,
HACG01044757	A0A0B7BFG3	gi|524898231|ref|XP_005105567.1|	16	35.5014	16	42	435.347	60,65,66,70,215,
HACG01015582	A0A0B6Z244	gi|524898259|ref|XP_005105581.1|	12	47.7679	12	106	1801.84	103,135,136,138,139,
HACG01037510	A0A0B7AWT2	gi|524898265|ref|XP_005105584.1|	2	7.19697	2	2	52.09	118,
HACG01037655	A0A0B7AXA4	gi|524898324|ref|XP_005105612.1|	16	31.6206	16	52	1149.19	220,221,222,
HACG01036719	A0A0B7ARC3	gi|524898449|ref|XP_005105673.1|	3	15.8996	3	9	208.299	120,140,141,143,
HACG01026977	A0A0B7A1L0	gi|524898531|ref|XP_005105713.1|	3	10.6227	3	8	127.735	115,118,119,158,159,229,
HACG01029000	A0A0B7A7B1	gi|524898670|ref|XP_005105781.1|	3	9.53608	3	3	95.7733	71,
HACG01003486	A0A0B6Y3C5	gi|524898743|ref|XP_005105817.1|	3	25.7353	3	5	86.02	239,
HACG01045773	A0A0B7BI62	gi|524898799|ref|XP_005105845.1|	5	2.67803	5	5	92.8	193,230,
HACG01010163	A0A0B6YLE0	gi|524898815|ref|XP_005105852.1|	2	34.2466	2	4	181.94	156,
HACG01036751	A0A0B7AUC3	gi|524898960|ref|XP_005105922.1|	5	10.274	5	9	162.294	75,
HACG01018677	A0A0B6ZAW0	gi|524899012|ref|XP_005105947.1|	2	7.50751	2	2	59.59	134,
HACG01040918	A0A0B7B407	gi|524899021|ref|XP_005105951.1|	2	7.8341	2	4	58.82	2,3,4,
HACG01019466	A0A0B6ZEP8	gi|524899091|ref|XP_005105986.1|	2	17.7966	2	2	44.28	243,245,
HACG01005782	A0A0B6Y8H9	gi|524899361|ref|XP_005106113.1|	4	7.57895	4	6	74.2533	71,72,75,223,
HACG01020090	A0A0B6ZGY4	gi|524899582|ref|XP_005106220.1|	18	56.0137	18	106	2069.34	114,115,118,120,121,129,134,309,310,
HACG01036427	A0A0B7ART3	gi|524899675|ref|XP_005106266.1|	3	11.6788	3	3	85.06	89,237,
HACG01036430	A0A0B7ATQ6	gi|524899675|ref|XP_005106266.1|	3	11.2319	3	7	125.126	126,132,
HACG01031174	A0A0B7AAN1	gi|524899715|ref|XP_005106286.1|	6	15.2019	6	12	307.717	66,79,
HACG01028968	A0A0B7A4V3	gi|524899882|ref|XP_005106367.1|	2	6.54762	2	2	63.79	62,68,
HACG01042636	A0A0B7BB55	gi|524900084|ref|XP_005106466.1|	4	9.75057	4	5	147.54	31,119,
HACG01010980	A0A0B6YQW1	gi|524900256|ref|XP_005106549.1|	2	16.8675	2	4	39.55	102,
HACG01019902	A0A0B6ZE91	gi|524900270|ref|XP_005106556.1|	2	15.3226	2	20	169.4	153,155,156,157,159,185,
HACG01038058	A0A0B7AVR0	gi|524900353|ref|XP_005106597.1|	3	6.66667	3	5	71.17	56,57,63,
HACG01044252	A0A0B7BE01	gi|524900380|ref|XP_005106610.1|	8	37.6744	8	17	460.052	121,142,320,
HACG01030816	A0A0B7ACE4	gi|524900386|ref|XP_005106613.1|	3	7.67494	3	3	94.7733	46,
HACG01038748	A0A0B7AXT4	gi|524900390|ref|XP_005106615.1|	2	8.63158	4	10	205.21	71,73,76,
HACG01038749	A0A0B7AX99	gi|524900390|ref|XP_005106615.1|	8	26.8657	10	41	632.781	72,73,219,223,225,247,248,74,
HACG01028200	A0A0B7A527	gi|524900516|ref|XP_005106678.1|	3	9.40594	3	11	245.205	109,121,122,
HACG01043939	A0A0B7BF43	gi|524900516|ref|XP_005106678.1|	20	58.5366	20	404	5063.81	77,104,105,108,109,110,111,112,117,119,120,121,122,102,103,106,107,138,139,140,141,158,287,306,315,316,318,290,293,
HACG01049618	A0A0B7BU43	gi|524900673|ref|XP_005106755.1|	21	63.7097	21	144	2237.96	102,103,107,110,111,112,140,104,139,285,292,287,
HACG01044800	A0A0B7BHM3	gi|524900699|ref|XP_005106768.1|	2	4.43213	2	7	104.674	64,65,69,75,
HACG01042407	A0A0B7BAD9	gi|524900809|ref|XP_005106822.1|	4	14.3275	4	8	145.52	23,217,218,
HACG01043308	A0A0B7BAV5	gi|524900993|ref|XP_005106911.1|	4	15.9236	4	6	116.273	88,89,
HACG01001744	A0A0B6XXH1	gi|524901357|ref|XP_005107086.1|	4	30.2521	4	5	72.99	239,
HACG01005209	A0A0B6Y7G2	gi|524901394|ref|XP_005107104.1|	4	23.0126	4	12	567.043	235,237,
HACG01026408	A0A0B6ZXE7	gi|524901519|ref|XP_005107166.1|	2	10.7317	2	3	62.92	102,103,
HACG01043428	A0A0B7BB74	gi|524901536|ref|XP_005107174.1|	6	14.1473	6	9	95.4411	185,225,
HACG01033873	A0A0B7AIR1	gi|524901804|ref|XP_005107306.1|	2	13.8889	2	5	101.32	152,245,
HACG01026469	A0A0B6ZXH5	gi|524901897|ref|XP_005107352.1|	9	36.8243	9	36	790.512	88,89,113,114,268,
HACG01049626	A0A0B7BVX2	gi|524901909|ref|XP_005107358.1|	6	35.6275	6	9	130.344	238,
HACG01008906	A0A0B6YIX8	gi|524902421|ref|XP_005107462.1|	5	39.2638	5	13	222.156	183,185,239,
HACG01047641	A0A0B7BQ86	gi|524902448|ref|XP_005107474.1|	2	6.86275	2	3	66.8567	185,
HACG01041869	A0A0B7B5V0	gi|524902626|ref|XP_005107542.1|	6	30.8057	6	10	153.85	112,120,140,147,
HACG01041871	A0A0B7B8S9	gi|524902628|ref|XP_005107543.1|	5	30.8057	5	7	150.117	102,110,
HACG01020312	A0A0B6ZFH0	gi|524902628|ref|XP_005107543.1|	10	45.1456	10	34	350.706	102,103,281,282,284,
HACG01029121	A0A0B7A7L4	gi|524902929|ref|XP_005107684.1|	5	16.5992	5	15	191.117	102,103,
HACG01019617	A0A0B6ZDI9	gi|524902931|ref|XP_005107685.1|	2	7.31707	2	2	46.02	154,
HACG01032007	A0A0B7AE20	gi|524903041|ref|XP_005107738.1|	10	20.0436	10	21	174.565	217,218,
HACG01046824	A0A0B7BK04	gi|524903201|ref|XP_005107810.1|	2	1.49533	2	2	67.98	153,
HACG01034037	A0A0B7AK12	gi|524903247|ref|XP_005107829.1|	5	12.9808	5	22	406.693	52,63,74,76,224,72,
HACG01023019	A0A0B6ZMK9	gi|524903262|ref|XP_005107836.1|	2	6.66667	2	2	43.93	141,
HACG01030526	A0A0B7A8S7	gi|524903293|ref|XP_005107850.1|	2	7.69231	2	7	153.733	81,91,94,
HACG01034412	A0A0B7AL25	gi|524903367|ref|XP_005107884.1|	6	18.9274	6	10	212.62	237,
HACG01006302	A0A0B6Y9Z4	gi|524903383|ref|XP_005107892.1|	3	20.2073	3	7	122.621	52,104,152,
HACG01039642	A0A0B7B0H4	gi|524903383|ref|XP_005107892.1|	39	58.3643	39	256	6022.53	16,47,49,50,103,53,101,126,127,128,137,125,141,
HACG01031423	A0A0B7ABY1	gi|524903438|ref|XP_005107919.1|	3	12.3134	3	3	86.9933	114,
HACG01020874	A0A0B6ZGK6	gi|524903522|ref|XP_005107960.1|	13	41.8239	13	93	1812.77	79,84,85,87,88,124,185,235,102,153,236,234,254,
HACG01032848	A0A0B7AFZ5	gi|524905999|ref|XP_005108354.1|	3	17.7419	3	8	147	113,222,
HACG01008711	A0A0B6YIE0	gi|524906293|ref|XP_005108469.1|	2	33.7079	2	4	136.05	26,27,
HACG01021370	A0A0B6ZKF2	gi|524906293|ref|XP_005108469.1|	2	10.8247	2	7	172.24	25,26,27,218,217,
HACG01008712	A0A0B6YHB7	gi|524906293|ref|XP_005108469.1|	4	23.8095	4	11	241.605	26,27,
HACG01037541	A0A0B7AWJ0	gi|524906491|ref|XP_005108543.1|	8	9.85748	8	31	477.607	3,61,201,200,199,202,203,205,207,209,
HACG01029167	A0A0B7A5X1	gi|524906739|ref|XP_005108592.1|	7	28.0443	7	16	513.675	134,
HACG01044209	A0A0B7BCM9	gi|524906745|ref|XP_005108595.1|	1	6.61479	2	3	73.99	136,
HACG01035194	A0A0B7AN66	gi|524906745|ref|XP_005108595.1|	2	14.1732	2	2	45.48	156,280,
HACG01039935	A0A0B7B3T9	gi|524906745|ref|XP_005108595.1|	2	13.0719	2	2	43.54	118,
HACG01044204	A0A0B7BCM4	gi|524906745|ref|XP_005108595.1|	2	7.29614	2	2	59.11	118,134,
HACG01039947	A0A0B7B1R1	gi|524906745|ref|XP_005108595.1|	3	20.4348	4	7	192.62	135,136,
HACG01044083	A0A0B7BDC0	gi|524906745|ref|XP_005108595.1|	10	36.7273	10	28	515.624	115,116,162,119,308,
HACG01029572	A0A0B7A739	gi|524906932|ref|XP_005108623.1|	2	2.1542	2	3	65.07	102,103,280,
HACG01012306	A0A0B6YTQ1	gi|524907151|ref|XP_005108701.1|	3	6.42202	3	4	121.04	107,
HACG01044154	A0A0B7BCH9	gi|524907238|ref|XP_005108742.1|	8	21.3592	8	12	119.013	250,
HACG01018498	A0A0B6Z9T0	gi|524907406|ref|XP_005108821.1|	3	10.9589	3	4	80.14	117,
HACG01045962	A0A0B7BIW0	gi|524907491|ref|XP_005108862.1|	4	14.8936	4	11	407.235	35,42,44,45,
HACG01036301	A0A0B7AT57	gi|524907533|ref|XP_005108883.1|	9	32.4042	9	50	1340.98	134,135,177,178,
HACG01020969	A0A0B6ZGW5	gi|524907576|ref|XP_005108904.1|	2	21.0526	2	21	331.518	8,97,167,183,187,189,192,199,200,203,211,212,
HACG01020970	A0A0B6ZJ92	gi|524907576|ref|XP_005108904.1|	4	23.6111	4	22	366.191	102,190,191,193,205,207,
HACG01036711	A0A0B7AU92	gi|524907580|ref|XP_005108906.1|	12	5.68131	12	27	317.067	102,207,103,189,236,187,193,197,190,205,215,
HACG01036716	A0A0B7AU95	gi|524907580|ref|XP_005108906.1|	16	8.20056	16	26	300.879	191,192,
HACG01036873	A0A0B7AS77	gi|524907590|ref|XP_005108911.1|	2	9.09091	2	2	42.29	116,237,
HACG01036242	A0A0B7AR86	gi|524907610|ref|XP_005108921.1|	9	27.4359	9	15	297.33	53,137,138,
HACG01031205	A0A0B7ADF6	gi|524907727|ref|XP_005108978.1|	3	11.1888	3	7	203.531	113,114,117,
HACG01011735	A0A0B6YSY4	gi|524907772|ref|XP_005108998.1|	6	12.3457	6	14	349.017	44,
HACG01037513	A0A0B7AU55	gi|524907822|ref|XP_005109023.1|	12	42.963	12	20	312.7	113,
HACG01002224	A0A0B6XYW3	gi|524907998|ref|XP_005109108.1|	3	10.2564	3	5	88.16	91,93,
HACG01023382	A0A0B6ZPC2	gi|524908282|ref|XP_005109244.1|	2	17.7914	2	4	160.04	153,
HACG01022663	A0A0B6ZM12	gi|524908284|ref|XP_005109245.1|	2	5.73248	2	2	36.93	230,
HACG01024929	A0A0B6ZT03	gi|524908412|ref|XP_005109303.1|	5	11.3402	5	6	83.7467	137,
HACG01005671	A0A0B6Y886	gi|524908509|ref|XP_005109349.1|	6	38	6	21	437.929	158,242,184,
HACG01034740	A0A0B7ANW8	gi|524908996|ref|XP_005109585.1|	7	16.9421	7	19	317.177	84,86,102,103,223,
HACG01047167	A0A0B7BMB1	gi|524909038|ref|XP_005109605.1|	3	9.7493	3	9	271.902	95,99,100,160,176,
HACG01007510	A0A0B6YFS7	gi|524909114|ref|XP_005109609.1|	26	67.8788	27	458	5086.09	97,164,168,169,170,171,172,173,174,180,181,182,183,185,132,152,160,240,364,365,
HACG01025971	A0A0B6ZYC5	gi|524909114|ref|XP_005109609.1|	32	90.3614	33	791	10634.4	102,103,151,164,168,169,170,172,173,174,175,176,180,181,182,183,184,185,132,150,152,163,177,178,130,134,135,149,167,222,240,363,364,
HACG01012045	A0A0B6YTV8	gi|524909258|ref|XP_005109678.1|	6	19.6262	6	14	307.306	61,67,153,226,246,178,245,
HACG01010190	A0A0B6YNL6	gi|524909838|ref|XP_005109815.1|	2	12.8571	2	3	90.5133	75,79,
HACG01037639	A0A0B7ATZ5	gi|524909838|ref|XP_005109815.1|	15	41.8708	15	72	1527.14	82,90,95,96,99,100,226,227,97,
HACG01013682	A0A0B6YWN1	gi|524909848|ref|XP_005109820.1|	2	7.35786	2	2	51.8	137,
HACG01049664	A0A0B7BTK4	gi|524909938|ref|XP_005109861.1|	2	4.79798	2	2	42.16	61,
HACG01029732	A0A0B7A7G1	gi|524910025|ref|XP_005109900.1|	4	31.0811	4	6	115.503	242,
HACG01004682	A0A0B6Y5I1	gi|524910025|ref|XP_005109900.1|	11	52.381	11	34	479.219	150,242,336,
HACG01016374	A0A0B6Z3M8	gi|524910167|ref|XP_005109966.1|	3	10.5455	3	10	197.29	89,113,117,114,
HACG01041724	A0A0B7B5F9	gi|524910284|ref|XP_005110023.1|	2	4.63158	2	3	51.5	213,
HACG01041725	A0A0B7B943	gi|524910284|ref|XP_005110023.1|	8	11.6951	8	20	235.65	212,214,
HACG01031920	A0A0B7AFT2	gi|524910373|ref|XP_005110066.1|	2	2.78232	2	3	53.82	171,
HACG01031913	A0A0B7ADC4	gi|524910373|ref|XP_005110066.1|	4	10.2625	4	14	250.281	74,76,126,137,143,222,167,174,183,
HACG01042042	A0A0B7B7P1	gi|524910383|ref|XP_005110071.1|	2	11.2033	2	3	111.413	102,
HACG01046021	A0A0B7BKL4	gi|524910660|ref|XP_005110205.1|	4	8.74704	4	5	91.57	60,66,
HACG01029956	A0A0B7A9Z0	gi|524910825|ref|XP_005110286.1|	2	10.6977	2	8	116.095	47,102,107,111,
HACG01028135	A0A0B7A4V7	gi|524910867|ref|XP_005110307.1|	3	9.34066	3	10	204.19	247,248,251,252,
HACG01029557	A0A0B7A6Z7	gi|524910869|ref|XP_005110308.1|	22	53.125	22	66	1222.99	48,251,252,149,
HACG01041037	A0A0B7B4W7	gi|524910895|ref|XP_005110321.1|	4	12.7717	4	4	90.48	75,
HACG01041038	A0A0B7B4E2	gi|524910895|ref|XP_005110321.1|	7	19.8068	7	11	271.599	65,
HACG01042176	A0A0B7B9T0	gi|524911477|ref|XP_005110601.1|	2	31	2	2	58.92	102,
HACG01002499	A0A0B6XZM9	gi|524911513|ref|XP_005110619.1|	6	33.3333	6	11	194.193	121,
HACG01037197	A0A0B7ATX1	gi|524911570|ref|XP_005110646.1|	7	1.92037	7	13	189.502	119,151,156,193,194,197,196,
HACG01022151	A0A0B6ZMD6	gi|524911650|ref|XP_005110685.1|	4	11.7936	4	11	256.106	52,55,
HACG01049717	A0A0B7BUI7	gi|524911866|ref|XP_005110793.1|	2	14.5161	2	3	63.1433	158,
HACG01031340	A0A0B7AE10	gi|524911945|ref|XP_005110830.1|	3	24.0385	3	5	78.61	131,
HACG01031342	A0A0B7AC06	gi|524911947|ref|XP_005110831.1|	11	61.2903	14	88	1049.11	101,238,102,103,104,105,114,106,118,185,226,
HACG01031347	A0A0B7AC12	gi|524911947|ref|XP_005110831.1|	20	49.8316	20	97	1233.98	88,237,89,185,217,242,258,259,260,261,262,
HACG01031348	A0A0B7ABQ4	gi|524911950|ref|XP_005110832.1|	13	31.694	13	32	501.279	66,70,79,227,243,
HACG01031722	A0A0B7AD59	gi|524911952|ref|XP_005110833.1|	2	13.2353	2	2	59.14	109,
HACG01031725	A0A0B7AFA0	gi|524911952|ref|XP_005110833.1|	14	60.3239	17	151	1574.85	102,103,105,104,106,112,119,116,138,185,329,
HACG01031723	A0A0B7ACU9	gi|524911954|ref|XP_005110834.1|	14	36.5385	16	74	1038.62	58,72,75,89,114,135,136,140,183,184,185,208,214,224,225,247,248,250,64,239,240,
HACG01031349	A0A0B7AB22	gi|524911954|ref|XP_005110834.1|	24	42.9936	25	161	2654.42	17,212,213,214,215,
HACG01006459	A0A0B6YAV5	gi|524912191|ref|XP_005110947.1|	6	59.4828	6	12	189.073	184,
HACG01031981	A0A0B7AFL7	gi|524912291|ref|XP_005110996.1|	3	30.6931	3	6	149.773	65,69,
HACG01045693	A0A0B7BHY4	gi|524912440|ref|XP_005111068.1|	23	67.2	23	501	7868.95	51,55,102,103,104,105,106,107,108,110,111,112,116,119,120,137,139,140,143,156,229,157,113,286,292,287,289,
HACG01034448	A0A0B7AKA6	gi|524912715|ref|XP_005111198.1|	3	3.71747	3	5	62.13	82,167,
HACG01034451	A0A0B7AMU4	gi|524912715|ref|XP_005111198.1|	3	3.72596	3	3	62.03	79,
HACG01027133	A0A0B6ZZJ3	gi|524912853|ref|XP_005111263.1|	5	11.2385	5	5	86.13	65,
HACG01005544	A0A0B6YAF2	gi|524912919|ref|XP_005111295.1|	3	6.2212	3	4	67.37	62,222,
HACG01033453	A0A0B7AHN0	gi|524912929|ref|XP_005111300.1|	5	27.9412	5	12	169.147	154,243,246,245,342,345,
HACG01037915	A0A0B7AXZ4	gi|524912929|ref|XP_005111300.1|	7	56.2044	7	34	540.302	53,55,154,171,182,241,243,245,246,153,345,
HACG01036632	A0A0B7AR58	gi|524913016|ref|XP_005111342.1|	3	13.6752	3	3	82.5433	139,
HACG01045941	A0A0B7BKD8	gi|524913044|ref|XP_005111356.1|	14	41.0557	14	59	898.747	83,86,87,88,89,184,230,231,250,252,
HACG01029410	A0A0B7A8F9	gi|524913109|ref|XP_005111388.1|	3	15.7635	3	3	58.6967	146,183,
HACG01011546	A0A0B6YRL9	gi|524913368|ref|XP_005111515.1|	12	36.7041	12	59	1382.61	59,66,70,79,60,61,100,227,176,215,187,216,
HACG01033394	A0A0B7AGY1	gi|524913419|ref|XP_005111540.1|	4	2.81612	4	5	91.26	14,82,
HACG01006431	A0A0B6YBU6	gi|524913668|ref|XP_005111659.1|	4	18.2266	4	7	164.224	137,
HACG01034511	A0A0B7AN06	gi|524913773|ref|XP_005111711.1|	2	6.33609	2	2	64.59	61,
HACG01023934	A0A0B6ZQ75	gi|524913818|ref|XP_005111733.1|	2	4.87805	2	6	142.85	126,131,132,237,
HACG01044912	A0A0B7BFW9	gi|524913881|ref|XP_005111763.1|	6	11.4618	6	10	172.59	116,119,138,212,
HACG01026092	A0A0B6ZXD7	gi|524914187|ref|XP_005111912.1|	2	5.78947	2	3	94.49	78,
HACG01026134	A0A0B6ZWQ2	gi|524914230|ref|XP_005111933.1|	8	18.3128	8	20	361.59	66,70,79,100,
HACG01039198	A0A0B7AZ66	gi|524914469|ref|XP_005112049.1|	4	17.2691	4	7	188.194	89,237,
HACG01043605	A0A0B7BEA7	gi|524914515|ref|XP_005112072.1|	6	27.686	6	10	75.08	102,103,
HACG01033827	A0A0B7AJC2	gi|524914829|ref|XP_005112224.1|	7	15.6627	7	16	311.308	20,21,22,23,212,110,116,134,135,
HACG01035499	A0A0B7AP52	gi|524914862|ref|XP_005112240.1|	3	12.5874	3	4	70.19	87,89,
HACG01036535	A0A0B7AU39	gi|524915110|ref|XP_005112361.1|	10	21.281	10	18	279.812	29,30,
HACG01020574	A0A0B6ZFT4	gi|524915372|ref|XP_005112487.1|	2	10.4651	2	2	41.73	160,
HACG01025155	A0A0B6ZW92	gi|524915397|ref|XP_005112499.1|	9	22.4274	9	38	483.794	178,180,181,182,183,
HACG01040174	A0A0B7B4K8	gi|524915405|ref|XP_005112503.1|	3	21.3675	3	24	597.773	167,177,178,182,241,243,
HACG01005293	A0A0B6Y7Q6	gi|524915677|ref|XP_005112631.1|	4	22.5352	4	19	311.672	153,154,156,155,
HACG01043042	A0A0B7BAJ1	gi|524915771|ref|XP_005112676.1|	5	31.8436	7	37	499.278	74,126,128,136,139,140,141,142,143,129,
HACG01043043	A0A0B7BA58	gi|524915771|ref|XP_005112676.1|	18	48.1132	18	149	1821.34	118,119,138,139,140,155,120,157,312,324,
HACG01005374	A0A0B6Y7V2	gi|524915787|ref|XP_005112684.1|	3	25.7576	3	3	101.293	182,
HACG01041190	A0A0B7B7H9	gi|524915789|ref|XP_005112685.1|	20	34.7368	20	80	1284.36	71,224,72,75,
HACG01016538	A0A0B6Z4D6	gi|524915990|ref|XP_005112779.1|	3	11.1111	3	5	95.87	115,
HACG01026903	A0A0B6ZYT4	gi|524916025|ref|XP_005112795.1|	38	68.75	40	736	16768.9	8,46,48,55,60,61,62,63,64,65,66,68,71,220,222,30,51,52,53,54,56,57,167,183,221,170,119,138,143,144,184,206,210,211,142,149,207,208,204,
HACG01012046	A0A0B6YT18	gi|524916029|ref|XP_005112797.1|	2	7.32484	2	2	89.37	124,174,
HACG01042454	A0A0B7B7J9	gi|524916317|ref|XP_005112938.1|	14	44.9438	14	85	1262.26	153,156,240,154,155,246,
HACG01027247	A0A0B7A0J2	gi|524916381|ref|XP_005112969.1|	2	8.78661	2	2	41.52	262,
HACG01049598	A0A0B7BU32	gi|524916452|ref|XP_005113003.1|	7	16.122	7	46	732.104	54,170,207,211,212,213,220,221,222,205,206,
HACG01027345	A0A0B7A2M0	gi|524916499|ref|XP_005113026.1|	2	7.39437	2	9	225.782	113,114,117,118,129,134,
HACG01037213	A0A0B7ASS1	gi|524916507|ref|XP_005113030.1|	21	64.1975	26	125	2891.81	83,84,118,247,
HACG01037215	A0A0B7ATA4	gi|524916507|ref|XP_005113030.1|	24	59.5679	28	195	3926.47	82,83,84,85,115,176,103,246,247,
HACG01015952	A0A0B6Z353	gi|524916593|ref|XP_005113070.1|	2	9.12281	2	2	44.48	167,
HACG01032767	A0A0B7AF40	gi|524916601|ref|XP_005113074.1|	6	6.32091	6	33	564.1	102,103,104,105,161,164,205,207,208,
HACG01032768	A0A0B7AFT1	gi|524916601|ref|XP_005113074.1|	12	10	12	16	215.607	193,
HACG01041240	A0A0B7B7M2	gi|524916607|ref|XP_005113077.1|	7	32.8889	7	59	765.354	102,103,107,108,111,112,104,110,140,285,287,289,290,292,
HACG01002458	A0A0B6XZK5	gi|524916974|ref|XP_005113254.1|	3	22.449	3	6	125.607	245,246,
HACG01011125	A0A0B6YRB2	gi|524917241|ref|XP_005113381.1|	14	35.8156	14	190	3547.67	44,77,102,103,113,114,115,117,127,128,85,118,105,167,104,270,271,
HACG01027738	A0A0B7A1B1	gi|524917273|ref|XP_005113396.1|	2	11.0169	2	4	151.84	243,244,
HACG01006651	A0A0B6YCG8	gi|524917285|ref|XP_005113402.1|	5	15.3333	5	14	230.006	115,134,238,136,
HACG01006012	A0A0B6Y975	gi|526117361|ref|NP_001267749.1|	2	12.5984	2	137	1144.67	56,57,153,154,155,157,158,159,161,162,170,175,176,184,185,208,209,226,227,240,241,242,243,246,
HACG01031217	A0A0B7ABQ5	gi|526117385|ref|NP_001267755.1|	20	54.8295	20	194	3066.34	67,71,72,82,83,84,86,92,93,94,95,103,104,105,109,110,111,112,114,118,219,226,245,85,248,
HACG01026662	A0A0B6ZYX4	gi|526117385|ref|NP_001267755.1|	26	74.184	26	376	8602.95	17,79,80,83,84,85,87,124,44,65,66,67,72,73,76,77,78,86,88,89,90,96,97,99,102,103,104,105,106,109,115,119,123,134,140,147,156,159,160,161,186,219,220,226,229,235,236,246,234,169,218,246,252,253,254,255,250,
HACG01027569	A0A0B7A0P5	gi|526117405|ref|NP_001267760.1|	6	67.8571	13	195	1772.65	150,151,242,241,332,334,
HACG01020603	A0A0B6ZG22	gi|526117405|ref|NP_001267760.1|	17	89.4118	23	561	7404.68	8,150,151,152,164,167,169,170,241,242,243,244,332,333,334,335,336,337,338,339,
HACG01037747	A0A0B7AUT8	gi|526117431|ref|NP_001267767.1|	4	31.25	4	11	160.679	156,244,
HACG01022356	A0A0B6ZMW6	gi|529444582|ref|XP_005242003.1|	7	43.3735	7	11	174.834	242,
HACG01013323	A0A0B6YVE0	gi|537705579|dbj|BAN81895.1|	1	30.2158	4	28	502.569	34,40,41,42,43,207,212,222,
HACG01042708	A0A0B7B969	gi|54020890|ref|NP_001005689.1|	3	10.8392	3	12	145.79	55,154,158,63,65,79,84,153,122,
HACG01042710	A0A0B7BBV4	gi|54020890|ref|NP_001005689.1|	7	23.6196	7	19	342.524	88,89,237,
HACG01042838	A0A0B7B9H8	gi|54020890|ref|NP_001005689.1|	9	30.4348	9	47	659.021	73,83,84,124,156,164,167,74,76,82,90,96,141,142,234,131,140,
HACG01012056	A0A0B6YT29	gi|541039654|gb|ERG79357.1|	8	20.5333	8	11	79.4118	91,
HACG01034279	A0A0B7AJF2	gi|546686668|gb|ERL95792.1|	7	54.5455	7	58	734.792	59,61,65,66,70,77,79,90,100,227,67,78,99,226,216,220,
HACG01033256	A0A0B7AJ70	gi|555688717|gb|ESN91949.1|	13	61.7857	13	192	2333.82	11,15,19,39,42,72,73,74,76,92,93,96,97,100,125,126,129,131,132,134,135,142,167,176,187,188,189,190,191,192,194,196,198,200,201,202,203,204,205,206,207,208,209,210,211,212,215,218,220,221,222,12,124,128,130,199,
HACG01031858	A0A0B7AD60	gi|555704960|gb|ESO08193.1|	6	52.8	6	103	2395.88	167,178,182,171,177,
HACG01002367	A0A0B6XYS2	gi|555930987|emb|CDJ08105.1|	3	35.4545	3	4	81.62	182,
HACG01022292	A0A0B6ZL79	gi|556093552|gb|ESO82205.1|	4	21.831	4	18	272.024	153,154,156,246,
HACG01047647	A0A0B7BNP4	gi|556093891|gb|ESO82544.1|	2	8.8	2	2	42.21	280,
HACG01038249	A0A0B7AVQ7	gi|556094374|gb|ESO83027.1|	3	8.08824	3	4	72.22	71,
HACG01031816	A0A0B7AF49	gi|556095158|gb|ESO83811.1|	9	21.2982	9	36	970.753	30,32,33,99,100,129,31,74,71,192,
HACG01031815	A0A0B7AFI5	gi|556095158|gb|ESO83811.1|	14	31.4402	14	24	466.578	96,98,137,222,120,136,
HACG01024134	A0A0B6ZQV8	gi|556095216|gb|ESO83869.1|	2	8.39695	2	5	179.87	119,138,140,
HACG01033471	A0A0B7AJY5	gi|556095567|gb|ESO84220.1|	9	25	9	30	750.78	30,31,32,33,
HACG01024668	A0A0B6ZSM2	gi|556095567|gb|ESO84220.1|	21	42.8008	22	38	770.117	33,189,191,192,
HACG01047259	A0A0B7BPP0	gi|556096092|gb|ESO84744.1|	30	44.2602	30	217	4565.4	11,12,13,14,15,118,211,35,37,138,140,70,212,100,324,
HACG01038371	A0A0B7AYU4	gi|556096138|gb|ESO84790.1|	43	64.946	46	676	15336.5	1,2,3,4,5,6,7,8,9,10,11,12,17,18,19,30,32,58,122,132,209,210,211,217,218,13,27,31,33,219,222,134,145,205,212,26,37,38,40,36,190,76,
HACG01028760	A0A0B7A6K9	gi|556097226|gb|ESO85878.1|	9	24.0602	9	23	461.744	58,64,65,115,127,134,
HACG01034230	A0A0B7AME1	gi|556097340|gb|ESO85992.1|	26	46.5665	27	343	7707.65	71,72,73,74,76,224,128,130,159,116,124,140,161,162,222,235,
HACG01040062	A0A0B7B268	gi|556097528|gb|ESO86180.1|	2	6.6092	2	4	89.97	122,229,
HACG01026494	A0A0B6ZXK1	gi|556097683|gb|ESO86335.1|	23	63.4969	23	183	2441.79	82,93,95,92,94,120,129,143,231,232,
HACG01032988	A0A0B7AGE0	gi|556098160|gb|ESO86812.1|	2	7.40741	2	11	225.526	103,127,128,129,131,143,173,174,178,183,
HACG01042737	A0A0B7B9L7	gi|556098160|gb|ESO86812.1|	7	23.6152	7	20	449.8	130,133,134,156,256,
HACG01023077	A0A0B6ZNM4	gi|556098443|gb|ESO87095.1|	3	8.45921	3	4	77.65	83,84,
HACG01016581	A0A0B6Z6E7	gi|556098588|gb|ESO87240.1|	10	37.8531	10	37	722.724	61,70,78,77,79,100,226,66,67,177,
HACG01042192	A0A0B7B823	gi|556099804|gb|ESO88456.1|	9	17.3258	9	15	122.587	217,219,
HACG01042855	A0A0B7BC63	gi|556100167|gb|ESO88819.1|	2	16.7742	2	7	84.4929	169,173,174,
HACG01044438	A0A0B7BE83	gi|556100834|gb|ESO89486.1|	5	22.5806	5	7	130.657	89,113,
HACG01047676	A0A0B7BQA8	gi|556101047|gb|ESO89699.1|	5	3.625	5	5	93.81	194,
HACG01019648	A0A0B6ZDA5	gi|556101117|gb|ESO89769.1|	2	8.51064	2	2	49.44	153,
HACG01012962	A0A0B6YUP5	gi|556101526|gb|ESO90178.1|	3	8.81459	3	8	148.96	130,131,132,
HACG01005397	A0A0B6Y7C6	gi|556103805|gb|ESO92457.1|	6	22.2628	6	7	102.104	118,280,
HACG01020663	A0A0B6ZG69	gi|556103805|gb|ESO92457.1|	8	27.3723	8	17	422.933	129,134,
HACG01041180	A0A0B7B7H2	gi|556104876|gb|ESO93528.1|	7	13.7233	13	21	230.507	21,207,26,199,229,
HACG01041185	A0A0B7B7H5	gi|556104876|gb|ESO93528.1|	11	16.0855	14	31	461.374	20,207,206,
HACG01037802	A0A0B7AVJ5	gi|556105072|gb|ESO93724.1|	6	24.2718	6	12	397.33	29,51,53,54,55,137,141,142,
HACG01037803	A0A0B7AUX9	gi|556105072|gb|ESO93724.1|	6	14.9171	6	29	511.292	28,29,50,51,53,54,63,64,65,55,139,140,142,141,
HACG01036862	A0A0B7ASX1	gi|556105117|gb|ESO93769.1|	4	13.879	5	24	164.742	13,154,203,190,191,
HACG01024624	A0A0B6ZS89	gi|556105302|gb|ESO93954.1|	7	42.7136	7	63	1042.57	11,76,105,109,110,116,122,200,201,202,203,199,245,125,204,205,293,305,
HACG01015956	A0A0B6Z4J2	gi|556105302|gb|ESO93954.1|	11	43.1611	11	44	835.704	132,134,135,136,142,143,226,183,
HACG01021111	A0A0B6ZJE8	gi|556106038|gb|ESO94690.1|	4	10.7551	4	6	146.417	64,65,
HACG01023498	A0A0B6ZP77	gi|556106043|gb|ESO94695.1|	3	9.375	3	7	110.854	140,141,143,232,233,
HACG01025507	A0A0B6ZVK6	gi|556106190|gb|ESO94842.1|	2	7.77385	2	2	73.99	114,
HACG01039240	A0A0B7B1W7	gi|556106190|gb|ESO94842.1|	3	20.0717	5	8	119.35	113,115,
HACG01046132	A0A0B7BJE5	gi|556106555|gb|ESO95207.1|	2	2.68972	2	2	64.38	102,
HACG01031367	A0A0B7AC33	gi|556107537|gb|ESO96189.1|	2	4.32432	2	3	111.317	205,212,
HACG01026411	A0A0B6ZZL3	gi|556108606|gb|ESO97258.1|	2	16.8224	2	4	82.19	70,77,
HACG01031982	A0A0B7ADY7	gi|556108834|gb|ESO97486.1|	8	18.806	8	22	503.435	65,79,69,75,213,
HACG01034822	A0A0B7AM26	gi|556109149|gb|ESO97801.1|	3	15.9794	4	30	459.993	64,72,76,154,
HACG01036269	A0A0B7AQ05	gi|556110210|gb|ESO98862.1|	4	19.8157	4	6	161.267	120,141,
HACG01035190	A0A0B7AQ72	gi|556110831|gb|ESO99482.1|	3	23.3766	3	21	264.238	129,164,166,169,171,173,174,177,184,
HACG01046339	A0A0B7BJT5	gi|556110866|gb|ESO99517.1|	17	17.2058	26	41	1147.79	1,
HACG01046342	A0A0B7BJW7	gi|556110866|gb|ESO99517.1|	20	15.2047	34	150	1602.33	35,36,39,38,
HACG01046340	A0A0B7BM14	gi|556110866|gb|ESO99517.1|	30	27.0208	64	289	5336.59	1,2,3,17,72,194,210,4,5,18,19,189,192,211,217,206,207,35,36,37,38,
HACG01019348	A0A0B6ZCH1	gi|556110891|gb|ESO99542.1|	4	21.5311	4	4	98.52	142,
HACG01033712	A0A0B7AJ18	gi|556111437|gb|ESP00089.1|	4	18.315	4	5	59.96	214,
HACG01025541	A0A0B6ZX48	gi|556111890|gb|ESP00542.1|	2	12.2807	2	2	55.68	184,
HACG01023271	A0A0B6ZQM3	gi|556113049|gb|ESP01701.1|	2	5.15222	2	2	55.76	222,
HACG01027196	A0A0B7A1T4	gi|556113071|gb|ESP01723.1|	3	9.18635	3	3	50.83	78,
HACG01014512	A0A0B6YZ12	gi|556113526|gb|ESP02178.1|	6	10.789	6	10	144.73	108,
HACG01031688	A0A0B7ACS5	gi|556113799|gb|ESP02451.1|	5	16.2234	5	10	219.92	75,
HACG01033368	A0A0B7AHD5	gi|556113946|gb|ESP02598.1|	6	10.5581	6	9	173.896	88,199,200,
HACG01030833	A0A0B7AA81	gi|556113964|gb|ESP02616.1|	9	19.7452	9	32	711.617	72,73,74,75,76,134,175,176,224,225,127,235,237,
HACG01018007	A0A0B6Z929	gi|556114398|gb|ESP03050.1|	5	15.812	5	11	92.9845	108,111,110,
HACG01027136	A0A0B7A1N5	gi|556114460|gb|ESP03112.1|	6	23.1076	6	12	204.977	105,116,119,
HACG01024031	A0A0B6ZSU8	gi|556114539|gb|ESP03191.1|	3	3.48004	3	6	88.27	197,198,
HACG01024029	A0A0B6ZT35	gi|556114539|gb|ESP03191.1|	5	11.5538	5	11	223.645	197,198,
HACG01045202	A0A0B7BGS4	gi|556114871|gb|ESP03523.1|	2	22.7273	2	3	73.0767	226,229,
HACG01030753	A0A0B7AA15	gi|556115860|gb|ESP04512.1|	2	4.47761	2	5	64.07	76,247,248,
HACG01026291	A0A0B6ZXT1	gi|556116273|gb|ESP04925.1|	7	35.4545	7	34	310.91	102,103,104,105,106,
HACG01002171	A0A0B6XZT4	gi|556116375|gb|ESP05027.1|	3	8.49315	3	8	110.075	69,79,100,227,
HACG01026667	A0A0B6ZYX8	gi|556116376|gb|ESP05028.1|	7	18.9041	7	20	235.17	61,66,70,226,179,
HACG01011547	A0A0B6YQJ8	gi|556116442|gb|ESP05094.1|	3	31.7073	3	20	958.39	59,65,66,70,79,216,
HACG01036889	A0A0B7ARU3	gi|556116519|gb|ESP05171.1|	2	11.4583	2	2	81.41	152,
HACG01040301	A0A0B7B2S2	gi|556729406|ref|XP_005960416.1|	2	8.72483	2	5	135.19	121,123,134,136,230,
HACG01034965	A0A0B7API4	gi|557010651|ref|XP_006006018.1|	7	18.3133	7	8	201.86	71,
HACG01026540	A0A0B7A0C0	gi|564743500|gb|AHC02701.1|	14	72.191	34	1115	21582.3	74,90,96,97,98,99,100,226,227,123,167,178,185,182,98,103,117,119,167,229,231,238,242,273,
HACG01001262	A0A0B6XVN1	gi|568291352|gb|ETN79106.1|	2	13.3333	2	38	163.712	80,81,91,94,95,96,227,228,230,231,
HACG01031797	A0A0B7ADC6	gi|576693750|gb|EUB57355.1|	10	66.9014	10	60	1228.52	241,243,244,245,
HACG01022028	A0A0B6ZK59	gi|576693750|gb|EUB57355.1|	12	51.4085	12	107	1237.88	153,241,243,244,245,246,341,342,
HACG01003348	A0A0B6Y257	gi|577029907|gb|AHH81788.1|	4	24.3421	4	8	98.495	184,349,
HACG01032979	A0A0B7AFP2	gi|583994656|ref|XP_006792469.1|	3	28.2353	3	6	73.8	150,151,228,
HACG01041447	A0A0B7B4M7	gi|585193165|ref|XP_006747803.1|	3	7.15706	3	8	158.465	205,207,212,206,
HACG01041270	A0A0B7B7P5	gi|585719304|ref|XP_006826038.1|	11	6.08519	11	14	146.709	77,79,191,194,193,
HACG01002192	A0A0B6XYA9	gi|589107123|ref|XP_006965584.1|	2	18.1818	2	2	63.62	238,
HACG01013990	A0A0B6YZD9	gi|597867153|gb|EYC16545.1|	2	24.4604	3	26	693.416	49,50,
HACG01016354	A0A0B6Z3L1	gi|602626279|ref|XP_007420100.1|	5	42.3313	6	117	2629.73	160,164,168,169,170,173,174,176,177,180,181,182,183,172,364,
HACG01038481	A0A0B7AZ60	gi|608090766|gb|EZG30020.1|	5	23.3766	5	17	271.065	119,121,122,120,123,228,
HACG01023086	A0A0B6ZQ71	gi|608096069|gb|EZG34785.1|	3	16.5563	3	5	101.51	183,
HACG01027770	A0A0B7A3T4	gi|620958561|ref|XP_007664363.1|	7	28.7037	7	38	461.135	10,15,73,76,89,90,199,201,203,204,210,211,212,218,219,77,79,78,80,81,
HACG01015203	A0A0B6Z0M5	gi|625230674|ref|XP_007606483.1|	4	53.4091	4	10	129.09	53,86,103,226,228,61,121,
HACG01027658	A0A0B7A130	gi|632946707|ref|XP_007888691.1|	5	12.7315	5	16	273.228	59,65,69,213,215,
HACG01025820	A0A0B6ZY45	gi|639127132|gb|AIA24462.1|	4	24.2424	4	5	168.86	245,
HACG01041506	A0A0B7B7T0	gi|642099995|emb|CDQ77143.1|	1	24.581	3	3	112.407	245,
HACG01005604	A0A0B6Y8L4	gi|646720608|gb|KDR22269.1|	3	30	3	6	165.15	153,154,
HACG01031074	A0A0B7AAF2	gi|6682319|emb|CAB64662.1|	19	44.5033	28	223	4005.57	8,97,111,186,187,188,189,190,191,192,193,198,203,204,205,206,207,208,195,
HACG01038089	A0A0B7AVB2	gi|68272049|gb|AAY89300.1|	2	11.9792	2	6	108.427	110,240,241,243,
HACG01044079	A0A0B7BCB5	gi|71726729|gb|AAZ39528.1|	33	60.7266	45	481	7397.03	2,23,31,49,64,65,102,156,167,190,191,192,193,194,197,198,199,200,202,220,221,223,224,225,230,19,21,50,52,86,89,101,103,117,119,186,188,203,204,209,210,211,55,184,32,46,68,116,183,189,201,208,42,60,105,111,113,137,138,187,222,97,217,185,136,138,139,140,169,137,148,
HACG01042503	A0A0B7B8N4	gi|73695954|gb|AAZ80783.1|	38	76.1905	38	2339	16103.2	8,48,63,71,72,73,74,76,129,150,222,223,224,225,227,228,233,234,235,236,237,238,239,240,241,242,243,247,248,249,250,251,252,16,49,101,102,152,153,154,229,230,231,232,103,244,97,118,147,245,98,149,263,264,99,262,265,298,300,301,302,303,162,
HACG01042692	A0A0B7B9H6	gi|74912853|sp|Q6QUW1.1|RGP51_LYMST	12	30.6667	16	84	1496.37	18,22,23,24,101,107,154,163,180,225,229,246,102,144,279,
HACG01047329	A0A0B7BLH7	gi|773571|emb|CAA60122.1|	2	20.3008	2	3	109.62	21,139,
HACG01034752	A0A0B7AL94	gi|773571|emb|CAA60122.1|	2	6.8323	3	4	130.06	21,
HACG01041381	A0A0B7B7F2	gi|773571|emb|CAA60122.1|	16	28.6392	17	37	724.757	21,197,198,138,
HACG01044081	A0A0B7BF93	gi|829207|emb|CAA39415.1|	30	61.2832	30	335	6356.18	8,16,29,47,51,53,54,58,195,205,206,212,44,61,67,75,114,207,218,229,141,
HACG01005064	A0A0B6Y739	gi|85753308|gb|AAG49533.3|	2	9.26829	2	13	185.343	28,50,103,109,115,154,155,156,167,222,246,
HACG01021068	A0A0B6ZHG1	gi|93209532|gb|ABF00124.1|	3	21.118	3	29	402.362	8,126,129,131,143,145,153,155,156,157,159,161,167,176,185,240,
HACG01023785	A0A0B6ZSB9	gi|994895|gb|AAB34494.1|	2	10.0386	2	2	80.78	50,
HACG01023782	A0A0B6ZQH3	gi|994895|gb|AAB34494.1|	9	34.0164	11	70	1300.36	46,58,71,72,73,74,76,143,64,52,139,185,
HACG01019435	A0A0B6ZEY8	Unknown	1	23.4637	4	5	72.27	62,
HACG01005243	A0A0B6Y7L6	Unknown	2	6.66667	2	2	52.57	67,
HACG01013119	A0A0B6YUN6	Unknown	2	7.98122	2	6	130.057	116,119,139,142,
HACG01028842	A0A0B7A4Y5	Unknown	2	15.3846	2	6	180.743	244,245,246,
HACG01032167	A0A0B7AEI5	Unknown	2	3.1068	2	2	44.71	194,
HACG01036973	A0A0B7AVD5	Unknown	2	19.6721	2	3	59.1033	240,
HACG01043414	A0A0B7BA86	Unknown	2	11.4035	2	4	57.32	156,158,348,
HACG01044713	A0A0B7BF10	Unknown	2	9.60699	2	2	30.47	102,
HACG01005312	A0A0B6Y748	Unknown	3	20	3	7	94.7057	156,157,
HACG01033711	A0A0B7AKN6	Unknown	3	39.3258	3	10	115.9	207,213,214,215,
HACG01039132	A0A0B7AZH5	Unknown	3	16.7702	3	20	275.94	160,163,164,168,183,169,173,174,176,181,
HACG01044724	A0A0B7BE79	Unknown	3	29.5455	3	11	166.581	231,235,236,232,233,261,
HACG01023202	A0A0B6ZNW9	Unknown	4	18.4615	4	32	299.555	16,49,18,105,109,110,111,194,196,197,200,207,211,212,213,98,100,101,103,282,289,
HACG01026720	A0A0B7A0U9	Unknown	4	28.481	4	56	1389.46	240,241,242,243,244,245,246,
HACG01044712	A0A0B7BE64	Unknown	4	21.2389	4	7	89.0843	237,238,
HACG01029986	A0A0B7AA27	Unknown	5	18.7023	5	29	484.257	162,228,230,231,232,233,235,236,229,234,249,250,
HACG01019436	A0A0B6ZEL1	Unknown	5	45.5782	10	53	1374.08	56,57,63,62,
HACG01032016	A0A0B7ACZ5	Unknown	9	50.9615	9	83	1050.25	240,241,243,244,245,334,338,340,
HACG01047575	A0A0B7BQP0	Unknown	26	43.0769	26	122	1681.4	34,118,180,181,182,183,116,178,251,252,268,49,86,89,114,102,67,298,
