# Supplementary material for: Transcriptomic and Proteomic Analysis of Arion vulgaris—Proteins for Probably Successful Survival Strategies?
Source: PLoS One. 2016 Mar 17;11(3):e0150614. doi: 10.1371/journal.pone.0150614 (PMC4795696; doi:10.1371/journal.pone.0150614)
Supplement: S3 Table — (XLSX) [file pone.0150614.s003.xlsx]

## Sheet: Abbreviation
Abbreviations used for protein identification
acc_embl	EMBL accession number
prot_acc	UniProt accesion number
prot_hit	hit in the NCBI nr database, cut off value of 1e-6
unique_peptides	number of unique peptides
prot_cover	protein coverage (%)
prot_matches	number of assigned peptide matches
prot_sequences	number of protein sequences
prot_score	MASCOT score
source	replicate number and slice number

## Sheet: 1DE
acc_embl	prot_acc	prot_hit	unique_peptides	prot_cover	num_matches	num_sequences	prot_score	source
HACG01006235	A0A0B6YC93	gi|100913266|gb|ABF69533.1|	3	15.2318	3	6	46.9433	1DA10,1DB13,1DB11,
HACG01041396	A0A0B7B7G5	gi|104162064|emb|CAK19329.1|	7	55.3571	7	207	3528.77	1DA1,1DA2,1DA5,1DA9,1DA10,1DA11,1DA12,1DB1,1DB2,1DB3,1DB4,1DB6,1DB9,1DB10,1DB11,1DB12,1DB13,1DA3,1DA4,1DA6,1DA7,1DA8,1DB8,1DB7,
HACG01031741	A0A0B7AEX4	gi|109157294|pdb|2CE6|A	2	28.7879	2	2	34.19	1DB2,1DB11,
HACG01031738	A0A0B7ACW2	gi|109157294|pdb|2CE6|A	4	33.0827	4	40	788.505	1DA1,1DA9,1DA11,1DB9,1DB10,1DB11,1DB13,1DA2,1DA7,1DA8,1DA10,1DA12,1DB1,1DB2,1DB3,1DB7,1DB8,1DB12,
HACG01018541	A0A0B6ZBX6	gi|110764763|ref|XP_001123191.1|	2	43.5484	2	8	238.67	1DA9,1DA10,1DA11,1DA12,1DB11,1DB12,
HACG01035125	A0A0B7AQ26	gi|115111533|gb|ABI84147.1|	4	13.3501	4	5	120.58	1DA3,1DB3,
HACG01031559	A0A0B7ABP9	gi|1169742|sp|P42577.2|FRIS_LYMST	3	57.4074	3	5	90.36	1DA9,1DB10,
HACG01027994	A0A0B7A1Q2	gi|1174755|sp|P43689.1|TPM2_BIOGL	1	14.1176	3	4	33.84	1DB4,
HACG01027993	A0A0B7A219	gi|1174755|sp|P43689.1|TPM2_BIOGL	2	57.6471	23	33	514.975	1DB6,
HACG01027987	A0A0B7A2L7	gi|1174755|sp|P43689.1|TPM2_BIOGL	14	74.5098	28	84	1265.41	1DB7,
HACG01021580	A0A0B6ZL60	gi|118401762|ref|XP_001033201.1|	2	17.6991	2	4	81.19	1DA12,1DB11,1DB12,
HACG01042890	A0A0B7BC90	gi|118425914|gb|ABK90856.1|	8	24.5614	8	23	659.126	1DA6,1DA7,1DB7,1DB8,
HACG01040075	A0A0B7B4D5	gi|119630315|gb|EAX09910.1|	19	54.6351	21	93	2078.59	1DA1,1DA2,1DA4,1DB1,1DB2,1DB3,1DB4,1DB5,1DA9,1DB10,
HACG01044080	A0A0B7BFQ7	gi|124233|sp|P22488.2|IFEA_HELAS	43	76.7361	59	847	16905.1	1DA1,1DA2,1DA3,1DA4,1DA5,1DA6,1DB1,1DB2,1DB3,1DB4,1DB5,1DB6,1DA7,1DA8,1DB7,1DA9,1DA10,1DA11,1DB8,
HACG01043659	A0A0B7BB09	gi|126697272|gb|ABO26593.1|	2	20.9184	3	5	80.71	1DA9,1DA10,1DB10,
HACG01016621	A0A0B6Z6H1	gi|126697356|gb|ABO26635.1|	10	55.0847	11	39	534.885	1DA7,1DA8,1DA9,1DB8,1DB9,1DB11,1DB10,
HACG01037885	A0A0B7AXF0	gi|126697362|gb|ABO26638.1|	18	83.3333	18	181	3463.34	1DA9,1DA10,1DA11,1DA12,1DB9,1DB10,1DB11,1DB12,1DB13,
HACG01025504	A0A0B6ZUR5	gi|126697398|gb|ABO26656.1|	3	18.5185	3	6	127.983	1DA8,1DB8,
HACG01035188	A0A0B7AMM4	gi|126697398|gb|ABO26656.1|	6	29.1005	6	10	147.57	1DA8,1DB8,1DB9,
HACG01027342	A0A0B7A018	gi|126697408|gb|ABO26661.1|	5	32.8042	5	8	180.155	1DB9,1DB10,
HACG01034998	A0A0B7ALE7	gi|126697410|gb|ABO26662.1|	2	16.4634	2	4	102.25	1DA10,1DB13,1DB9,1DB10,
HACG01023214	A0A0B6ZN56	gi|126697410|gb|ABO26662.1|	12	56.3636	12	207	5349.22	1DA1,1DA2,1DA3,1DA4,1DA5,1DA6,1DA7,1DA8,1DA9,1DA10,1DA11,1DA12,1DB1,1DB2,1DB3,1DB4,1DB5,1DB6,1DB7,1DB8,1DB10,1DB11,1DB12,1DB13,1DB9,
HACG01042834	A0A0B7B8N8	gi|126697420|gb|ABO26667.1|	32	58.9537	32	93	1806.07	1DA2,1DA3,1DA4,1DA5,1DB1,1DB3,1DB4,1DB5,1DB6,1DA6,
HACG01042329	A0A0B7B774	gi|127773|sp|P24733.1|MYS_ARGIR	27	50.0515	92	659	19585.8	1DA1,1DA2,1DA4,1DA9,1DB4,1DB12,1DB13,1DA5,1DA6,1DA8,1DB6,1DB7,1DA11,1DA7,
HACG01042331	A0A0B7BA60	gi|127773|sp|P24733.1|MYS_ARGIR	50	68.9127	176	1022	23055.6	1DA3,1DB1,1DB2,1DB3,
HACG01020018	A0A0B6ZEB8	gi|13177628|gb|AAK14899.1|	7	27.8302	7	11	258.802	1DA7,1DB2,1DB3,1DB8,
HACG01020020	A0A0B6ZGN1	gi|13177628|gb|AAK14899.1|	7	21.5909	7	14	410.864	1DA3,1DB3,1DB2,
HACG01019974	A0A0B6ZE01	gi|13177628|gb|AAK14899.1|	10	25.5208	10	17	385.494	1DA3,1DB3,
HACG01002577	A0A0B6XZI3	gi|133874728|gb|ABO40828.1|	4	23.3871	4	4	99.2	1DA6,1DB7,
HACG01022213	A0A0B6ZKN4	gi|147903958|ref|NP_001090965.1|	5	69.3878	5	25	580.42	1DA10,1DA11,1DA12,1DB11,1DB12,1DB13,
HACG01024295	A0A0B6ZTS1	gi|147905746|ref|NP_001080566.1|	15	83.6735	29	182	3911.74	1DA1,1DA2,1DA6,1DA7,1DA9,1DB5,1DB10,1DA8,1DB8,
HACG01031103	A0A0B7AB68	gi|148236249|ref|NP_001087612.1|	3	30.5195	4	4	51.89	1DB12,
HACG01048537	A0A0B7BRA9	gi|148724316|gb|ABR08403.1|	1	16.1074	2	7	284.101	1DA4,1DA5,1DB5,
HACG01036073	A0A0B7AQ36	gi|149032103|gb|EDL87015.1|	2	40.9241	9	53	1271.09	1DA4,1DA6,1DB4,1DB5,1DB8,
HACG01027768	A0A0B7A1D3	gi|150251390|gb|ABR68007.1|	5	45.5056	5	41	1155.55	1DA1,1DA3,1DA4,1DB1,1DB3,1DB4,1DA2,1DA7,1DA10,1DB2,1DB5,1DB7,1DB8,
HACG01030659	A0A0B7A964	gi|150251390|gb|ABR68007.1|	9	30.1471	10	25	688.65	1DA1,1DA2,1DA3,1DA4,1DA10,1DB1,1DB3,1DB2,
HACG01016312	A0A0B6Z477	gi|150251390|gb|ABR68007.1|	10	37.883	10	59	1260.34	1DA1,1DA2,1DA3,1DA4,1DA5,1DA6,1DA7,1DA8,1DB1,1DB2,1DB3,1DB4,1DB5,
HACG01030662	A0A0B7AA53	gi|150251390|gb|ABR68007.1|	10	25.2285	10	10	270.25	1DB4,
HACG01030661	A0A0B7AC05	gi|150251390|gb|ABR68007.1|	14	42.2018	15	61	1945.21	1DB1,1DB2,1DB3,1DB4,
HACG01046905	A0A0B7BNM3	gi|150251390|gb|ABR68007.1|	20	53.777	20	114	2370.61	1DA1,1DA2,1DA3,1DA4,1DA7,1DB1,1DB2,1DB3,1DB4,1DA5,1DA6,1DB5,
HACG01002122	A0A0B6XY64	gi|150251390|gb|ABR68007.1|	21	50.8009	21	130	2865.07	1DA1,1DA2,1DA3,1DA4,1DA5,1DA6,1DB6,1DB1,1DB3,1DA7,1DA8,1DA9,1DB2,1DB4,1DB5,1DB7,1DB8,1DA11,
HACG01018645	A0A0B6ZCS1	gi|150251392|gb|ABR68008.1|	2	35.3659	5	9	177.849	1DB3,
HACG01018644	A0A0B6ZA94	gi|150251392|gb|ABR68008.1|	8	37.2807	8	62	1041.17	1DA1,1DA2,1DA3,1DA4,1DA5,1DA6,1DA7,1DA8,1DA9,1DB1,1DB2,1DB3,1DB4,1DB5,1DB9,1DB7,
HACG01018643	A0A0B6ZAK4	gi|150251392|gb|ABR68008.1|	29	51.3043	29	151	3179.46	1DA1,1DA3,1DA4,1DB1,1DB2,1DB3,1DB4,1DA2,1DA5,1DA9,1DA6,1DA7,1DA8,1DB7,1DA12,1DB5,
HACG01032078	A0A0B7ADZ2	gi|152003983|gb|ABS19815.1|	3	15.984	12	19	357.13	1DA1,1DB1,1DB2,
HACG01032080	A0A0B7AGC7	gi|152003985|gb|ABS19816.1|	11	32.1839	20	53	1551.63	1DA1,1DB1,1DA2,1DB2,1DB3,
HACG01037656	A0A0B7AWV4	gi|152032020|gb|ABS28869.1|	11	39.2226	11	56	583.594	1DA4,1DA6,1DA7,1DA8,1DB1,1DB4,1DB7,1DB8,1DB9,1DA5,1DB6,
HACG01041441	A0A0B7B7K9	gi|156144968|gb|ABU53030.1|	4	22.1106	4	5	60.29	1DB9,
HACG01031029	A0A0B7AA84	gi|156373963|ref|XP_001629579.1|	2	7.90698	2	2	26.93	1DB9,
HACG01037778	A0A0B7AUB3	gi|156392725|ref|XP_001636198.1|	3	10.2167	3	3	44.48	1DB7,
HACG01048090	A0A0B7BS54	gi|157690722|tpe|CAL69088.1|	4	40.7407	4	24	310.755	1DA11,1DA12,1DB10,1DB11,1DB12,1DB13,
HACG01005410	A0A0B6Y9Y9	gi|158997667|gb|ABW86957.1|	8	46.875	8	196	3488.07	1DA1,1DA3,1DA5,1DA6,1DA7,1DA8,1DA9,1DA10,1DA11,1DA12,1DB1,1DB3,1DB6,1DB7,1DB8,1DB9,1DB10,1DB11,1DB12,1DB13,1DA4,1DB2,1DB4,1DB5,
HACG01020565	A0A0B6ZI91	gi|168252891|gb|ACA23131.1|	11	65.8333	11	68	1494.57	1DA10,1DA11,1DA12,1DB11,1DB12,1DB13,1DB1,1DB9,1DB10,
HACG01050258	A0A0B7BVT7	gi|170053486|ref|XP_001862696.1|	3	34.0909	3	4	44.54	1DB1,
HACG01005464	A0A0B6Y847	gi|170596696|ref|XP_001902862.1|	1	29.7872	3	21	588.73	1DA6,1DA7,1DA8,1DA9,1DA10,1DB1,1DB7,1DB8,1DB10,1DB11,1DB12,1DB13,
HACG01006452	A0A0B6YAF3	gi|184186107|ref|NP_001116975.1|	3	22.2222	4	6	116.743	1DB1,1DB8,
HACG01049531	A0A0B7BVK0	gi|189308122|gb|ACD86945.1|	1	70.3125	7	273	4574.27	1DB4,1DB5,1DB6,
HACG01030871	A0A0B7ACJ1	gi|195429214|ref|XP_002062659.1|	3	25.8065	3	7	96.0771	1DB10,1DB13,
HACG01035561	A0A0B7AR08	gi|198285569|gb|ACH85323.1|	2	7.1618	2	2	49.45	1DB7,
HACG01002031	A0A0B6XZE6	gi|198430879|ref|XP_002123222.1|	2	37.8947	2	4	187.71	1DA12,1DB11,1DB12,
HACG01041706	A0A0B7B8E9	gi|2073142|dbj|BAA19861.1|	5	43.5897	5	16	273.405	1DA11,1DB11,1DB12,1DB13,
HACG01018944	A0A0B6ZB52	gi|2073142|dbj|BAA19861.1|	8	54.6053	8	201	4261.53	1DA2,1DA3,1DA4,1DA5,1DA6,1DA7,1DA8,1DA9,1DA10,1DA11,1DA12,1DB1,1DB9,1DB10,1DB11,1DB12,1DB13,1DB2,1DB3,1DB8,
HACG01032978	A0A0B7AGC8	gi|2073142|dbj|BAA19861.1|	9	69.863	9	126	2816.28	1DA7,1DA8,1DA9,1DA10,1DA11,1DA12,1DB8,1DB9,1DB10,1DB11,1DB12,1DB13,
HACG01005349	A0A0B6Y7S8	gi|2073142|dbj|BAA19861.1|	10	40.1099	10	40	485.575	1DA9,1DA10,1DB10,1DB11,1DB13,1DB7,
HACG01024954	A0A0B6ZT36	gi|2073142|dbj|BAA19861.1|	13	61.5385	13	278	4822.63	1DA1,1DA2,1DA4,1DA5,1DA6,1DA7,1DA8,1DA9,1DA10,1DA11,1DA12,1DB1,1DB7,1DB9,1DB10,1DB11,1DB12,1DB13,1DA3,1DB8,1DB2,1DB3,1DB4,1DB6,
HACG01027153	A0A0B6ZZL1	gi|2073146|dbj|BAA19863.1|	2	15.9341	2	2	57.24	1DA11,1DB11,
HACG01041231	A0A0B7B721	gi|210076789|gb|ACJ06748.1|	4	39.8305	4	7	86.44	1DA8,1DB8,1DB9,
HACG01041235	A0A0B7B7L8	gi|210076789|gb|ACJ06748.1|	4	32.0312	4	9	220.211	1DA7,1DA8,1DB8,1DB9,
HACG01047826	A0A0B7BQN9	gi|21388656|dbj|BAC00784.1|	1	34.7539	34	37	701.159	1DB2,
HACG01038883	A0A0B7AY52	gi|218683625|gb|ACL00841.1|	4	25.8706	4	17	459.421	1DA1,1DB1,1DB2,1DB3,1DB4,
HACG01029389	A0A0B7A5L0	gi|218683627|gb|ACL00842.1|	29	64.8601	29	117	3207.97	1DA3,1DA4,1DA5,1DA6,1DB4,1DB5,1DB3,1DB6,1DB1,1DA10,1DA7,1DB2,
HACG01016085	A0A0B6Z5J3	gi|220067263|gb|ACL79834.1|	31	85.8586	31	293	6253.37	1DA1,1DA2,1DA3,1DA4,1DA5,1DA6,1DA7,1DA8,1DA9,1DB1,1DB3,1DB4,1DB5,1DB6,1DB9,1DA10,1DA12,1DB2,1DB7,1DA11,1DB12,
HACG01028626	A0A0B7A654	gi|22024001|ref|NP_523708.2|	3	23.8636	3	5	109.55	1DB11,1DB12,
HACG01038091	A0A0B7AVB5	gi|220979902|emb|CAQ64775.1|	2	44.0415	7	9	186.019	1DB10,
HACG01038090	A0A0B7AYN3	gi|220979902|emb|CAQ64775.1|	4	27.3504	5	7	93.5543	1DA9,1DB9,
HACG01040303	A0A0B7B286	gi|226478902|emb|CAX72946.1|	9	74.505	22	234	5014.05	1DA1,1DA2,1DA3,1DA4,1DA5,1DA6,1DA7,1DA8,1DA9,1DA10,1DA11,1DB1,1DB2,1DB3,1DB4,1DB5,1DB6,1DB9,
HACG01030300	A0A0B7AB24	gi|232136|sp|P30683.3|GNAO_LYMST	7	19.209	7	12	100.847	1DB1,1DB5,1DB6,
HACG01018263	A0A0B6Z9C3	gi|23394916|gb|AAN31640.1|AF484963_1	7	28.8462	7	12	152.35	1DA8,1DB8,1DB9,
HACG01025470	A0A0B6ZX45	gi|239509144|gb|ACR81565.1|	5	55.5556	5	12	182.397	1DB11,1DB12,
HACG01035498	A0A0B7ANE5	gi|241151391|ref|XP_002406661.1|	16	74.5721	23	122	1778.12	1DA3,1DA4,1DA5,1DB1,1DB4,1DB5,
HACG01019419	A0A0B6ZCG8	gi|241273677|ref|XP_002406620.1|	23	65.8371	26	73	1342.88	1DA3,1DA4,1DA5,1DA6,1DB4,1DB5,1DB6,1DB1,1DB7,
HACG01037765	A0A0B7AXJ5	gi|241556129|ref|XP_002399605.1|	8	50.5495	8	19	285.601	1DA8,1DA9,1DB9,1DB10,1DB11,
HACG01011947	A0A0B6YRP1	gi|241835856|ref|XP_002415077.1|	8	41.2088	8	15	149.21	1DA9,1DB10,1DB9,
HACG01049577	A0A0B7BU80	gi|2493427|sp|Q27312.1|NADA_APLKU	3	11.465	3	4	78.37	1DA6,1DB6,
HACG01035716	A0A0B7ARF8	gi|253317417|gb|ACT22633.1|	3	49	9	208	4144.94	1DA1,1DA2,1DA3,1DA4,1DA5,1DA6,1DA7,1DA8,1DA9,1DA10,1DA11,1DA12,1DB1,1DB2,1DB3,1DB4,1DB5,1DB6,1DB7,1DB8,1DB9,1DB10,1DB11,1DB12,1DB13,
HACG01027336	A0A0B7A261	gi|254939725|gb|ACT88125.1|	6	56.3758	6	10	148.01	1DB11,1DB12,
HACG01016916	A0A0B6Z764	gi|260781473|ref|XP_002585834.1|	8	61.9718	8	37	664.882	1DA8,1DA9,1DA10,1DA11,1DB11,1DB12,1DB13,
HACG01025622	A0A0B6ZVY0	gi|260784400|ref|XP_002587255.1|	3	8.33333	3	3	63.6667	1DB4,
HACG01044205	A0A0B7BFZ1	gi|260807417|ref|XP_002598505.1|	2	16.8067	2	2	36.02	1DB7,
HACG01032866	A0A0B7AI19	gi|260811516|ref|XP_002600468.1|	2	16.4251	2	3	73.26	1DA8,1DB9,
HACG01040191	A0A0B7B463	gi|260813969|ref|XP_002601688.1|	3	6.79612	3	3	67.62	1DB5,
HACG01037692	A0A0B7AVA2	gi|260821662|ref|XP_002606151.1|	4	55.1724	19	78	1608.52	1DA7,1DA8,1DA11,1DB2,1DB5,1DB7,
HACG01040300	A0A0B7B4W9	gi|260821662|ref|XP_002606151.1|	9	58.7952	21	110	2702.38	1DA4,1DA5,1DB4,1DB5,1DB1,1DB3,
HACG01005065	A0A0B6Y944	gi|260828603|ref|XP_002609252.1|	3	62.963	10	53	1491.53	1DA4,1DA5,1DB4,1DB5,
HACG01044155	A0A0B7BFV6	gi|270268071|gb|ACZ65578.1|	14	45.4545	14	30	654.053	1DA4,1DB4,1DB5,1DA5,
HACG01031605	A0A0B7AEZ9	gi|27763677|gb|AAO20109.1|	2	8.86076	2	2	40.31	1DB1,
HACG01002185	A0A0B6Y0L0	gi|281345481|gb|EFB21065.1|	3	69.1176	4	9	149.927	1DA8,1DB9,1DB10,1DB7,
HACG01048457	A0A0B7BQS5	gi|2827905|gb|AAB99911.1|	8	19.3448	10	22	432.315	1DA4,1DB4,
HACG01036910	A0A0B7AV72	gi|291234885|ref|XP_002737379.1|	2	28.5714	2	5	99.95	1DB11,1DB12,1DB13,
HACG01038212	A0A0B7AWQ6	gi|291235073|ref|XP_002737469.1|	11	41.4847	11	26	326.607	1DA7,1DB7,1DB8,1DB1,
HACG01010990	A0A0B6YQX3	gi|291242935|ref|XP_002741349.1|	2	20.4082	2	2	29.56	1DB11,
HACG01028798	A0A0B7A4C4	gi|291245044|ref|XP_002742403.1|	2	7.92453	2	3	65.1033	1DB8,1DB9,
HACG01038884	A0A0B7AXM8	gi|293595779|gb|ADE45333.1|	2	13.5135	2	3	127.75	1DB1,1DB2,
HACG01016370	A0A0B6Z682	gi|29378327|gb|AAO83845.1|AF484088_1	3	19.3069	3	4	131.13	1DA7,1DB7,
HACG01023909	A0A0B6ZQ48	gi|29378329|gb|AAO83846.1|AF484089_1	2	15.4206	2	4	79.68	1DB8,
HACG01043920	A0A0B7BF23	gi|29378333|gb|AAO83848.1|AF484091_1	1	30.1471	4	15	498.663	1DB9,1DB10,1DB11,1DB12,1DB13,
HACG01006611	A0A0B6YCE0	gi|29378333|gb|AAO83848.1|AF484091_1	2	27.3333	4	23	844.841	1DA7,1DA8,1DA9,1DB7,1DB8,1DB9,1DB10,1DB11,1DB12,1DB13,
HACG01026355	A0A0B6ZZQ9	gi|29378335|gb|AAO83849.1|AF484092_1	2	4.26439	2	2	55.12	1DB4,
HACG01033714	A0A0B7AHV8	gi|294896502|ref|XP_002775589.1|	1	70.8333	5	10	204.28	1DB2,1DB3,
HACG01033713	A0A0B7AIG1	gi|294896502|ref|XP_002775589.1|	3	42.5806	11	20	343.59	1DB2,1DB3,
HACG01021699	A0A0B6ZIV8	gi|296190822|ref|XP_002743358.1|	20	38.8554	21	52	1117.74	1DA3,1DA4,1DA5,1DB4,1DB3,1DA8,1DA10,1DB2,
HACG01026542	A0A0B6ZYJ1	gi|296837083|gb|ADH59421.1|	25	71.7026	35	441	9016.95	1DA2,1DA3,1DA4,1DA5,1DA6,1DA7,1DA8,1DA9,1DA12,1DB1,1DB3,1DB4,1DB5,1DB6,1DB7,1DB8,1DB12,
HACG01033255	A0A0B7AJL9	gi|297186099|gb|ADI24337.1|	2	15.1163	2	2	49.65	1DB9,
HACG01033254	A0A0B7AGI6	gi|297186099|gb|ADI24337.1|	3	8.98551	3	9	186.516	1DA1,1DA2,1DA3,1DA6,1DB1,1DB3,1DB4,
HACG01033262	A0A0B7AHM7	gi|297186099|gb|ADI24337.1|	7	18.3588	7	8	148.28	1DB2,
HACG01030844	A0A0B7A9N2	gi|302139997|gb|ADK94900.1|	1	85.5263	6	32	522.663	1DA6,
HACG01046369	A0A0B7BJZ7	gi|305689815|gb|ADM64337.1|	25	69.0909	25	341	9279.11	1DA1,1DA2,1DA3,1DA4,1DA5,1DA6,1DA7,1DA9,1DB1,1DB2,1DB3,1DB4,1DB5,1DB6,1DB8,1DA8,1DA10,1DA11,1DA12,1DB7,1DB9,1DB10,1DB12,1DB13,1DB11,
HACG01011513	A0A0B6YQ67	gi|307192533|gb|EFN75721.1|	4	27.4286	4	12	152.433	1DA10,1DB10,1DB13,
HACG01046784	A0A0B7BJW9	gi|318609972|dbj|BAJ61596.1|	112	81.5331	117	3270	88132.2	1DA1,1DA2,1DA3,1DB1,1DB2,1DB3,1DB6,1DA4,1DA5,1DA6,1DA7,1DA8,1DA9,1DB4,1DB5,1DB7,1DB8,1DB9,1DA10,1DA11,1DA12,1DB10,1DB11,1DB12,1DB13,
HACG01036550	A0A0B7AU63	gi|321472487|gb|EFX83457.1|	20	33.7127	20	55	985.362	1DA3,1DA4,1DA5,1DB1,1DB3,1DB4,1DB5,1DB2,
HACG01005859	A0A0B6Y962	gi|32169292|emb|CAD89885.1|	12	39.2	12	26	232.223	1DA7,1DB1,1DB8,1DB7,
HACG01040023	A0A0B7B1J6	gi|323134763|gb|ADX31293.1|	2	13.5802	2	4	84.48	1DA11,1DB11,
HACG01024722	A0A0B6ZT97	gi|325197136|ref|NP_001191419.1|	7	52.8571	7	29	493	1DA10,1DA11,1DB11,1DB13,1DB9,1DB10,1DB12,
HACG01035566	A0A0B7AR32	gi|325197143|ref|NP_001191422.1|	2	17.2414	2	4	81.19	1DA7,1DB7,
HACG01045625	A0A0B7BK47	gi|325197162|ref|NP_001191425.1|	3	18.4932	3	5	70.99	1DB5,1DB6,
HACG01045619	A0A0B7BGN5	gi|325197162|ref|NP_001191425.1|	6	29.1339	6	11	232.442	1DA5,1DB5,1DB6,
HACG01025347	A0A0B6ZV22	gi|325209004|ref|NP_001191451.1|	3	16.5354	3	4	97.24	1DA7,1DB7,1DB8,
HACG01043219	A0A0B7B9S4	gi|325296727|ref|NP_001191598.1|	4	25	4	34	526.602	1DA7,1DA8,1DA9,1DA10,1DA11,1DA12,1DB9,1DB10,1DB13,1DB1,1DB8,
HACG01005709	A0A0B6Y8U1	gi|325296731|ref|NP_001191601.1|	3	10.5096	3	4	102.97	1DA7,1DB7,
HACG01044042	A0A0B7BDF9	gi|325296743|ref|NP_001191607.1|	4	26.1092	11	30	621.417	1DA3,1DB1,1DB3,1DB4,1DA4,
HACG01044036	A0A0B7BF17	gi|325296743|ref|NP_001191607.1|	27	66.893	34	104	1852.3	1DA1,1DA2,1DA3,1DA4,1DB1,1DB2,1DB3,1DB4,
HACG01026828	A0A0B6ZYG6	gi|325296789|ref|NP_001191633.1|	2	4.92126	2	2	48.15	1DB4,1DB5,
HACG01013367	A0A0B6YVR0	gi|325296803|ref|NP_001191642.1|	1	27.2	2	2	54.82	1DB11,
HACG01049724	A0A0B7BTQ8	gi|325296803|ref|NP_001191642.1|	5	45.2229	6	19	230.801	1DA10,1DB13,1DB11,1DB10,
HACG01031558	A0A0B7ACG2	gi|325296839|ref|NP_001191661.1|	4	38.8889	4	19	152.385	1DA9,1DB10,1DB13,1DB2,
HACG01037162	A0A0B7ATU8	gi|325296847|ref|NP_001191665.1|	12	26.9231	13	18	400.371	1DA4,1DB4,
HACG01032956	A0A0B7AIB4	gi|325296853|ref|NP_001191458.1|	2	24.4094	5	5	114.24	1DB4,
HACG01032957	A0A0B7AGP8	gi|325296853|ref|NP_001191458.1|	3	26.25	4	6	134.137	1DA4,1DB4,
HACG01032960	A0A0B7AIR4	gi|325296853|ref|NP_001191458.1|	8	23.2932	9	15	293.007	1DA4,1DB4,
HACG01032486	A0A0B7AH31	gi|325296855|ref|NP_001191459.1|	2	23.6364	4	5	113.6	1DB3,
HACG01018951	A0A0B6ZD82	gi|325296855|ref|NP_001191459.1|	4	30.1158	6	6	137.137	1DB3,
HACG01018952	A0A0B6ZBJ4	gi|325296855|ref|NP_001191459.1|	4	44.5833	8	10	286.63	1DB2,1DB3,
HACG01032487	A0A0B7AFD1	gi|325296855|ref|NP_001191459.1|	12	26.5159	20	25	637.94	1DA3,1DB3,
HACG01006396	A0A0B6YBR1	gi|325296867|ref|NP_001191465.1|	6	29.1498	6	12	261.893	1DA7,1DB8,1DB7,
HACG01034517	A0A0B7ALE1	gi|325296875|ref|NP_001191469.1|	11	64.2487	11	27	294.566	1DA9,1DB10,1DB13,
HACG01024843	A0A0B6ZSZ5	gi|325296881|ref|NP_001191472.1|	5	27.7487	5	5	71.63	1DB9,
HACG01017555	A0A0B6Z9P2	gi|325296883|ref|NP_001191473.1|	11	59.2391	11	26	349.115	1DA8,1DB1,1DB7,1DB8,1DB9,1DB10,1DA9,
HACG01002084	A0A0B6XYJ5	gi|325296937|ref|NP_001191493.1|	4	28.6957	4	7	65.5786	1DA8,1DB8,1DB10,1DB9,
HACG01018972	A0A0B6ZBK8	gi|325296937|ref|NP_001191493.1|	5	36.4035	5	9	161.699	1DA8,1DB9,1DB8,
HACG01033397	A0A0B7AI15	gi|325296986|ref|NP_001191507.1|	5	8.7969	5	6	84.31	1DB3,1DB4,1DB7,
HACG01002120	A0A0B6Y0F8	gi|325296989|ref|NP_001191508.1|	8	40.9091	10	15	210.58	1DA8,1DB9,
HACG01044436	A0A0B7BG60	gi|325296989|ref|NP_001191508.1|	12	64.9194	14	43	562.083	1DA8,1DA9,1DB9,1DB10,1DB8,
HACG01036337	A0A0B7ARH9	gi|325296995|ref|NP_001191510.1|	7	43.2258	7	24	433.622	1DA8,1DA9,1DA10,1DB10,1DB11,1DB13,1DB9,
HACG01002090	A0A0B6Y0D6	gi|325297011|ref|NP_001191514.1|	3	16.3009	4	9	143.558	1DA4,1DA7,1DB1,1DB4,1DB5,
HACG01042193	A0A0B7B7T1	gi|325297015|ref|NP_001191515.1|	2	15.0943	5	5	100.7	1DB5,
HACG01049578	A0A0B7BU14	gi|325297037|ref|NP_001191522.1|	4	27.5	4	21	637.287	1DA4,1DA5,1DA6,1DA9,1DA10,1DA11,1DB1,1DB4,1DB8,1DB9,1DB10,1DB13,
HACG01038478	A0A0B7AX00	gi|325297040|ref|NP_001191523.1|	11	35.8852	13	19	301.605	1DA5,1DB5,
HACG01038482	A0A0B7AXH2	gi|325297040|ref|NP_001191523.1|	16	70.7819	18	71	1047.87	1DA2,1DA4,1DA5,1DB5,1DA3,1DB4,1DA6,1DB6,1DB1,1DB2,1DB3,
HACG01041507	A0A0B7B670	gi|325297052|ref|NP_001191530.1|	18	82	29	351	7646.69	1DA3,1DA4,1DA5,1DB1,1DB2,1DB3,1DB4,1DB5,1DB6,1DB7,1DA10,
HACG01033698	A0A0B7AIF0	gi|325297068|ref|NP_001191538.1|	2	8.49673	2	2	62.1	1DB7,
HACG01045609	A0A0B7BJK4	gi|325297068|ref|NP_001191538.1|	7	15.7382	9	18	259.568	1DA3,1DB3,1DB4,
HACG01045606	A0A0B7BJK9	gi|325297068|ref|NP_001191538.1|	13	26.5842	14	31	534.325	1DA3,1DA4,1DB3,1DB4,1DB1,1DB2,1DB5,
HACG01026751	A0A0B7A0H0	gi|325297094|ref|NP_001191555.1|	13	48.855	13	28	680.496	1DA4,1DA5,1DA6,1DB5,1DB6,1DB4,
HACG01030256	A0A0B7AAS1	gi|325297144|ref|NP_001191581.1|	43	62.1053	46	159	3235.88	1DA2,1DA4,1DA9,1DB4,1DA3,1DB3,1DA8,1DB5,1DA5,1DB1,1DA7,1DB8,
HACG01009296	A0A0B6YK18	gi|325297146|ref|NP_001191582.1|	9	39.0244	9	16	378.582	1DA5,1DB4,1DB5,1DB6,
HACG01030596	A0A0B7ABV6	gi|325504381|emb|CBX41690.1|	4	24.359	4	68	1934.26	1DA1,1DA2,1DA3,1DA4,1DA5,1DA6,1DA7,1DA8,1DA9,1DA10,1DA11,1DA12,1DB1,1DB2,1DB3,1DB6,1DB7,1DB8,1DB9,1DB10,1DB11,1DB12,1DB13,
HACG01012868	A0A0B6YU02	gi|326535853|gb|ADZ76593.1|	8	18.1146	8	9	136.339	1DA4,1DB4,
HACG01024544	A0A0B6ZRY6	gi|328905044|gb|AEB54797.1|	2	10.628	2	2	29.5	1DB9,
HACG01023901	A0A0B6ZSF2	gi|328933188|gb|AEB70965.1|	10	37.4613	10	23	503.079	1DA5,1DA6,1DB6,1DB7,
HACG01047764	A0A0B7BMV8	gi|333449383|gb|AEF33378.1|	4	35.1351	4	14	397.679	1DA10,1DB10,1DB13,1DB11,
HACG01038092	A0A0B7AWH6	gi|339247869|ref|XP_003375568.1|	1	18.5714	2	2	60.07	1DA11,
HACG01038096	A0A0B7AY50	gi|339247869|ref|XP_003375568.1|	1	61.658	9	29	524.804	1DA9,1DB9,1DB10,
HACG01048542	A0A0B7BRB6	gi|340381720|ref|XP_003389369.1|	2	16.1616	2	11	167.944	1DB1,1DB6,1DB3,1DB4,1DB5,1DB7,
HACG01049394	A0A0B7BSP5	gi|346721859|gb|AEO50742.1|	2	14.2276	3	7	117.523	1DB1,1DB2,
HACG01034367	A0A0B7AKX4	gi|346987840|gb|AEO51766.1|	2	12.5	2	8	185.385	1DA1,1DA2,1DA3,1DA4,1DB1,1DB2,
HACG01048708	A0A0B7BRG2	gi|346987840|gb|AEO51766.1|	5	42	8	22	534.605	1DA1,1DA2,1DB1,
HACG01032822	A0A0B7AGB0	gi|346987840|gb|AEO51766.1|	8	33.7449	10	107	2726.15	1DA1,1DA2,1DA3,1DA4,1DA5,1DA8,1DA9,1DB1,1DB2,1DB3,1DB11,1DB12,1DB13,
HACG01032823	A0A0B7AFX7	gi|346987840|gb|AEO51766.1|	9	31.941	12	56	1360.05	1DA1,1DB2,1DA2,1DB1,
HACG01034366	A0A0B7AML2	gi|346987840|gb|AEO51766.1|	10	33.3333	10	29	457.515	1DA1,1DA2,1DA3,1DB1,1DB2,
HACG01034365	A0A0B7AMR8	gi|346987840|gb|AEO51766.1|	33	43.5308	33	183	3318.74	1DA1,1DA2,1DA3,1DA4,1DB1,1DB2,1DB3,1DA9,1DB4,1DA7,1DA8,1DA10,1DB8,1DB9,1DB10,1DB12,
HACG01048711	A0A0B7BT79	gi|346987840|gb|AEO51766.1|	36	18.6732	38	105	2142.39	1DA3,1DA5,1DA6,1DA7,1DA11,1DB4,1DA10,1DA12,1DB7,1DB9,1DB10,
HACG01048714	A0A0B7BT84	gi|346987840|gb|AEO51766.1|	63	43.7286	93	489	10429.4	1DA1,1DA2,1DA4,1DB1,1DB2,1DB3,1DA8,
HACG01048715	A0A0B7BTV5	gi|346987844|gb|AEO51768.1|	2	38.2989	65	120	2074.28	1DB1,
HACG01032797	A0A0B7AG88	gi|346987844|gb|AEO51768.1|	5	26.2009	6	28	323.131	1DA1,1DA2,1DB1,1DB2,
HACG01044223	A0A0B7BDN3	gi|346987844|gb|AEO51768.1|	10	32.4219	12	80	1287.99	1DA1,1DA2,1DA3,1DB1,1DB2,1DB3,
HACG01048717	A0A0B7BRR5	gi|346987844|gb|AEO51768.1|	14	13.9706	15	23	404.777	1DA9,1DB5,
HACG01044221	A0A0B7BFK4	gi|346987844|gb|AEO51768.1|	16	36.044	17	86	1625.15	1DA1,1DA2,1DA3,1DA4,1DA9,1DB1,1DB2,1DB3,
HACG01034082	A0A0B7AK64	gi|348573378|ref|XP_003472468.1|	7	16.7373	7	18	440.234	1DA4,1DA5,1DB4,1DB5,
HACG01025845	A0A0B6ZY72	gi|348577231|ref|XP_003474388.1|	6	30.4721	6	27	453.687	1DA8,1DA9,1DB8,1DB9,1DB10,1DA10,1DA11,
HACG01028292	A0A0B7A3D6	gi|350536823|ref|NP_001233149.1|	5	23.7548	5	6	125.377	1DB7,
HACG01012119	A0A0B6YRU8	gi|351709298|gb|EHB12217.1|	11	52.8302	11	265	4016.72	1DA1,1DA2,1DA3,1DA4,1DA5,1DA6,1DA7,1DA8,1DA9,1DA10,1DA11,1DA12,1DB1,1DB2,1DB5,1DB8,1DB9,1DB10,1DB11,1DB12,1DB13,1DB4,1DB6,1DB7,1DB3,
HACG01036655	A0A0B7AUG5	gi|351714959|gb|EHB17878.1|	5	16.6667	6	7	192.551	1DB5,
HACG01042493	A0A0B7B8M4	gi|353236678|emb|CCA68668.1|	6	20.3704	6	7	131.003	1DA6,1DB6,
HACG01013874	A0A0B6YWN9	gi|374093227|ref|NP_001243365.1|	5	62.9213	5	17	303.854	1DA12,1DB1,1DB9,1DB12,
HACG01040354	A0A0B7B513	gi|374718481|gb|AEZ67032.1|	2	4.54545	2	4	88.91	1DA7,1DB7,1DB8,
HACG01034434	A0A0B7AJW5	gi|375073675|gb|AFA34396.1|	8	58.2524	8	22	354.867	1DA11,1DA12,1DB12,1DB10,1DB11,1DB13,
HACG01043220	A0A0B7BAP3	gi|380022918|ref|XP_003695281.1|	5	44.2396	5	21	398.108	1DA9,1DB9,1DB10,1DB13,
HACG01030594	A0A0B7A907	gi|38043955|emb|CAD83837.1|	3	32.1637	4	32	909.789	1DA1,1DA2,1DA3,1DA5,1DA8,1DA9,1DA11,1DA12,1DB9,1DB13,1DA7,1DA10,1DB10,
HACG01026990	A0A0B7A1M5	gi|38043955|emb|CAD83837.1|	4	50	4	39	793.479	1DA1,1DA2,1DA5,1DA6,1DA7,1DA8,1DA9,1DA10,1DA11,1DA12,1DB1,1DB10,1DB11,1DB12,1DB13,1DB5,1DB7,1DB2,
HACG01029563	A0A0B7A6S4	gi|38043955|emb|CAD83837.1|	7	52.514	7	19	235.928	1DA9,1DA10,1DA11,1DB9,1DB11,1DB12,1DB13,
HACG01039813	A0A0B7B0W2	gi|383859188|ref|XP_003705078.1|	10	12.02	10	15	406.927	1DB1,1DB2,
HACG01042549	A0A0B7B7V9	gi|385145402|emb|CCG28026.1|	24	80.3191	33	2612	54460.4	1DA1,1DA2,1DA3,1DA4,1DA5,1DA6,1DA7,1DA8,1DB1,1DB2,1DB3,1DB4,1DB5,1DB6,1DB7,1DB8,1DB9,1DB10,1DB11,1DB12,1DB13,1DA9,1DA10,1DA12,1DA11,
HACG01013178	A0A0B6YUZ5	gi|387157924|ref|NP_001248345.1|	5	22.7488	5	10	71	1DB1,1DB5,1DB6,1DB7,
HACG01015202	A0A0B6Z0Z6	gi|390349570|ref|XP_782388.3|	1	69.2308	5	21	381.528	1DB4,1DB5,1DB12,
HACG01030337	A0A0B7A943	gi|393908216|gb|EFO23038.2|	1	6.21762	2	4	57.97	1DB1,1DB2,
HACG01042560	A0A0B7BBI6	gi|395484809|gb|AFN66649.1|	2	5.37084	2	2	41.41	1DB6,
HACG01036074	A0A0B7API8	gi|397511018|ref|XP_003825879.1|	4	37.2881	12	73	1731.54	1DA1,1DA2,1DA3,1DB1,1DB3,1DB4,1DB5,1DB6,
HACG01051547	A0A0B7BZP5	gi|397776464|gb|AFO64930.1|	2	27.0968	3	5	109.84	1DB7,1DB8,
HACG01036067	A0A0B7AQU9	gi|399932045|gb|AFP57558.1|	1	34.6341	7	22	540.149	1DB4,
HACG01046079	A0A0B7BHZ4	gi|402227989|gb|AFQ35982.1|	8	46.5438	8	25	511.79	1DA7,1DA8,1DB1,1DB8,1DB9,1DB10,
HACG01043439	A0A0B7BAA8	gi|403310251|emb|CCJ09600.1|	2	6.18102	2	3	69.8967	1DA2,1DB1,
HACG01048030	A0A0B7BRV5	gi|405950185|gb|EKC18187.1|	4	2.25209	4	4	111.81	1DA2,1DA3,
HACG01048032	A0A0B7BPU2	gi|405950185|gb|EKC18187.1|	22	8.6351	22	31	517.759	1DA1,1DB1,1DB2,
HACG01031114	A0A0B7AAI2	gi|405950236|gb|EKC18235.1|	3	10.6599	3	3	32.95	1DA5,1DB5,
HACG01022287	A0A0B6ZL73	gi|405951515|gb|EKC19421.1|	9	35.1724	9	15	414.293	1DA5,1DA6,1DB6,1DA7,
HACG01034636	A0A0B7ANE7	gi|405951631|gb|EKC19528.1|	3	20.3704	3	7	275.754	1DB8,1DB9,
HACG01011817	A0A0B6YR22	gi|405952171|gb|EKC20013.1|	2	6.21891	2	3	114.157	1DB5,
HACG01036732	A0A0B7ASK0	gi|405952673|gb|EKC20457.1|	4	38.2022	6	15	175.057	1DA7,1DA8,1DB1,1DB4,1DB8,1DB13,
HACG01044300	A0A0B7BG67	gi|405952673|gb|EKC20457.1|	10	59.3023	11	58	706.374	1DA9,1DA10,1DA11,1DB10,1DB11,1DB12,1DB13,1DB9,
HACG01032649	A0A0B7AHZ4	gi|405952830|gb|EKC20593.1|	2	4.94297	2	2	82.01	1DB4,
HACG01022033	A0A0B6ZM00	gi|405953142|gb|EKC20858.1|	15	46.8547	15	43	711.094	1DA3,1DA4,1DB4,1DB5,1DB1,1DA5,1DB3,
HACG01045810	A0A0B7BKI9	gi|405955268|gb|EKC22447.1|	2	3.29308	2	2	47.73	1DB1,
HACG01028087	A0A0B7A2Z1	gi|405957390|gb|EKC23604.1|	2	17.9641	2	3	68.28	1DA9,1DB10,
HACG01028017	A0A0B7A2P8	gi|405957391|gb|EKC23605.1|	8	40.7801	8	8	226.925	1DB8,
HACG01045111	A0A0B7BI46	gi|405957680|gb|EKC23874.1|	2	6.43275	2	2	36.12	1DA3,1DB1,
HACG01043866	A0A0B7BEI4	gi|405958669|gb|EKC24774.1|	2	7.65306	2	3	60.04	1DA3,1DA9,1DB1,
HACG01043867	A0A0B7BCW1	gi|405958669|gb|EKC24774.1|	3	12.4031	4	7	190.087	1DB2,1DB3,
HACG01027648	A0A0B7A119	gi|405959537|gb|EKC25563.1|	5	26.8182	5	12	307.973	1DA7,1DB7,1DB8,
HACG01037085	A0A0B7AVS2	gi|405959696|gb|EKC25703.1|	9	29.085	9	14	265.099	1DA6,1DA7,1DB6,1DB7,
HACG01038763	A0A0B7AXU5	gi|405960075|gb|EKC26025.1|	2	5.25362	2	5	123.5	1DB3,1DB4,
HACG01033197	A0A0B7AHG5	gi|405960204|gb|EKC26145.1|	12	17.3114	12	18	378.291	1DA1,1DA2,1DB2,
HACG01031820	A0A0B7AFI8	gi|405960381|gb|EKC26308.1|	2	34.6939	3	8	224.345	1DA12,1DB11,1DB12,1DB13,
HACG01046040	A0A0B7BLC7	gi|405960381|gb|EKC26308.1|	2	35.0515	3	8	160.1	1DA12,1DB12,
HACG01035745	A0A0B7ARR8	gi|405960426|gb|EKC26351.1|	26	68.8129	26	121	2932.09	1DA1,1DA3,1DA4,1DA5,1DB3,1DB4,1DB5,1DA2,1DA6,1DA7,1DA8,1DB1,1DB2,1DB6,1DB7,1DA11,1DA12,
HACG01039893	A0A0B7B077	gi|405960428|gb|EKC26353.1|	5	18.2796	5	29	618.066	1DA4,1DA5,1DA6,1DA8,1DA9,1DB1,1DB3,1DB4,1DB5,1DB6,1DB7,1DB9,1DB10,
HACG01021215	A0A0B6ZK09	gi|405960599|gb|EKC26510.1|	2	24.359	2	2	27.89	1DA12,
HACG01005827	A0A0B6Y8M6	gi|405960672|gb|EKC26570.1|	2	26.25	2	6	117.64	1DA12,1DB12,
HACG01046160	A0A0B7BL09	gi|405961635|gb|EKC27403.1|	5	4.92154	5	7	150.457	1DA1,1DA2,1DB1,1DB2,1DB11,
HACG01031366	A0A0B7ADV8	gi|405962076|gb|EKC27784.1|	4	10.4972	4	4	55.3	1DB7,
HACG01031168	A0A0B7ABB4	gi|405962100|gb|EKC27804.1|	2	4.14634	2	2	34.41	1DB6,
HACG01028965	A0A0B7A763	gi|405962978|gb|EKC28598.1|	10	42.7966	10	14	299.547	1DB8,
HACG01022129	A0A0B6ZK72	gi|405964935|gb|EKC30373.1|	12	26.009	12	24	490.613	1DA3,1DB3,1DB4,1DA4,1DB1,
HACG01041753	A0A0B7B6G9	gi|405965644|gb|EKC31006.1|	3	21.4876	6	7	170.464	1DB8,
HACG01041754	A0A0B7B5I7	gi|405965644|gb|EKC31006.1|	8	36.2637	9	15	347.36	1DA7,1DB7,1DB8,
HACG01022928	A0A0B6ZMB4	gi|405965813|gb|EKC31167.1|	9	45.2489	9	22	377.601	1DA8,1DB8,1DB9,1DB10,
HACG01019486	A0A0B6ZER8	gi|405966102|gb|EKC31422.1|	4	12.5731	4	4	61.53	1DB7,
HACG01022048	A0A0B6ZJX7	gi|405966469|gb|EKC31748.1|	9	45.2145	9	13	384.735	1DA7,1DB7,
HACG01016355	A0A0B6Z667	gi|405967712|gb|EKC32845.1|	7	32.8302	7	7	104.45	1DA7,1DB7,
HACG01044923	A0A0B7BFL7	gi|405967797|gb|EKC32924.1|	5	46.1538	8	34	1231.79	1DA1,1DA3,1DA4,1DB1,1DB2,1DB3,1DB4,
HACG01021681	A0A0B6ZL27	gi|405967885|gb|EKC33004.1|	3	13.7546	3	5	86.85	1DA8,1DB8,
HACG01024914	A0A0B6ZSZ0	gi|405968748|gb|EKC33788.1|	5	37.1585	5	14	388.824	1DA9,1DA10,1DB10,1DB13,
HACG01018585	A0A0B6ZCM1	gi|405968798|gb|EKC33830.1|	8	30.03	8	11	281.725	1DA7,1DB7,1DB8,
HACG01046830	A0A0B7BNF1	gi|405969732|gb|EKC34685.1|	8	17.8506	8	17	252.961	1DA1,1DA2,1DB2,1DB1,
HACG01046199	A0A0B7BIA1	gi|405969853|gb|EKC34799.1|	8	17.637	8	14	282.657	1DA4,1DB1,1DB4,1DB5,
HACG01046159	A0A0B7BI68	gi|405970416|gb|EKC35324.1|	2	2.55517	2	3	80.62	1DA2,1DB1,
HACG01048570	A0A0B7BTH9	gi|405970416|gb|EKC35324.1|	7	3.98343	7	11	283.037	1DA1,1DA2,1DB1,1DB2,
HACG01028061	A0A0B7A4H2	gi|405970417|gb|EKC35325.1|	2	3.6961	2	2	31.65	1DB2,
HACG01045237	A0A0B7BGV9	gi|405970417|gb|EKC35325.1|	2	6.29371	2	2	47.15	1DB2,1DB8,
HACG01028062	A0A0B7A2W7	gi|405970417|gb|EKC35325.1|	5	8.03571	5	7	114.596	1DB1,1DB2,1DB3,1DB5,
HACG01045218	A0A0B7BGI8	gi|405970417|gb|EKC35325.1|	5	13.4087	5	9	108.83	1DB1,1DB3,1DB4,1DB2,
HACG01022050	A0A0B6ZMI3	gi|405970776|gb|EKC35652.1|	1	12.1495	2	2	39.06	1DA10,
HACG01026898	A0A0B6ZYS9	gi|405970776|gb|EKC35652.1|	10	71.3333	10	84	1224.37	1DA9,1DA10,1DB10,1DB11,1DB12,1DB13,
HACG01011812	A0A0B6YRA5	gi|405970946|gb|EKC35808.1|	6	63.7681	6	30	872.377	1DA11,1DB11,1DB12,1DB13,1DA12,
HACG01027824	A0A0B7A182	gi|405970946|gb|EKC35808.1|	9	58.6957	9	17	454.612	1DA11,1DB11,1DB12,
HACG01005567	A0A0B6Y7Z4	gi|405972388|gb|EKC37161.1|	5	16.9935	5	7	122.857	1DA8,1DB8,
HACG01042269	A0A0B7B722	gi|405972472|gb|EKC37239.1|	11	27.1686	12	22	486.171	1DA4,1DB4,1DB3,
HACG01034823	A0A0B7ALF3	gi|405972489|gb|EKC37255.1|	5	21.875	5	5	114.09	1DB6,
HACG01038635	A0A0B7B087	gi|405972817|gb|EKC37565.1|	2	54.2373	2	6	116.98	1DB1,1DB8,1DB9,1DB10,1DB13,
HACG01043652	A0A0B7BCB3	gi|405972881|gb|EKC37628.1|	2	10.2041	2	5	82.04	1DA9,1DB10,1DB9,
HACG01011710	A0A0B6YSW4	gi|405973356|gb|EKC38075.1|	8	43.3333	9	11	186.177	1DB9,1DB10,
HACG01046133	A0A0B7BJ98	gi|405973516|gb|EKC38224.1|	4	41.6667	10	13	215.933	1DB2,1DB3,1DB5,
HACG01005317	A0A0B6Y752	gi|405974177|gb|EKC38843.1|	2	11.7978	2	2	58.24	1DB10,
HACG01023869	A0A0B6ZQ13	gi|405974628|gb|EKC39257.1|	9	31.8182	9	52	1143.67	1DA4,1DA5,1DA6,1DA7,1DA8,1DB8,1DB9,1DB10,1DA10,1DB7,
HACG01005168	A0A0B6Y7G7	gi|405975533|gb|EKC40092.1|	3	14.3911	3	5	64.6	1DA7,1DB7,1DB8,
HACG01026816	A0A0B7A0M9	gi|405975785|gb|EKC40331.1|	1	56.4439	32	116	2523.15	1DA3,1DB3,1DA4,1DB4,
HACG01026815	A0A0B7A146	gi|405975785|gb|EKC40331.1|	6	56.1825	32	156	3231.96	1DA1,1DA2,1DA3,1DB1,1DB2,1DB3,1DB4,1DA4,1DA5,1DA6,1DA7,1DA8,1DB8,
HACG01035937	A0A0B7AQC8	gi|405976077|gb|EKC40598.1|	6	12.1495	6	6	124.447	1DB4,
HACG01049147	A0A0B7BSZ1	gi|405976805|gb|EKC41289.1|	3	6.10998	3	4	33.21	1DB4,1DB5,
HACG01011158	A0A0B6YP61	gi|405977265|gb|EKC41724.1|	2	4.61894	2	2	45.02	1DB6,
HACG01024443	A0A0B6ZRV2	gi|405977577|gb|EKC42020.1|	3	12.7937	3	4	77.4	1DB1,1DB2,
HACG01029126	A0A0B7A7M0	gi|405977876|gb|EKC42303.1|	2	12.2449	2	2	98.08	1DB6,
HACG01038459	A0A0B7AZ38	gi|405978690|gb|EKC43060.1|	3	7.14286	3	3	117.67	1DB5,
HACG01047104	A0A0B7BKY3	gi|405978809|gb|EKC43171.1|	14	31.9185	14	26	633.549	1DA4,1DA5,1DA8,1DB1,1DB4,1DB5,1DB2,
HACG01019769	A0A0B6ZDG6	gi|410591636|sp|I0CME8.1|HYAL_CONAQ	4	12.8405	4	5	70.1	1DA4,1DB5,
HACG01049651	A0A0B7BVZ4	gi|421975936|gb|AFX73000.1|	8	38.342	8	19	140.301	1DA10,1DB10,1DB13,1DB1,
HACG01027996	A0A0B7A2N2	gi|42559558|sp|O97192.1|TPM_HELAS	1	10.5634	4	8	139.55	1DA2,1DA3,
HACG01028008	A0A0B7A242	gi|42559558|sp|O97192.1|TPM_HELAS	2	24.2958	8	9	129.663	1DB5,
HACG01028009	A0A0B7A1R9	gi|42559558|sp|O97192.1|TPM_HELAS	6	56.6038	18	96	1911.38	1DA7,1DB7,
HACG01028005	A0A0B7A4G7	gi|42559558|sp|O97192.1|TPM_HELAS	6	72.5352	28	69	876.155	1DB7,
HACG01027991	A0A0B7A489	gi|42559558|sp|O97192.1|TPM_HELAS	8	64.0845	23	77	1134.56	1DA4,1DA7,1DB7,1DB9,
HACG01027999	A0A0B7A234	gi|42559558|sp|O97192.1|TPM_HELAS	11	53.169	17	41	700.321	1DA7,1DB8,
HACG01027998	A0A0B7A227	gi|42559558|sp|O97192.1|TPM_HELAS	13	67.2535	25	81	1440.75	1DA5,1DA6,1DB6,
HACG01027985	A0A0B7A4E2	gi|42559558|sp|O97192.1|TPM_HELAS	24	83.0986	41	319	6065.18	1DA1,1DA2,1DA3,1DA4,1DA5,1DA6,1DA7,1DA8,1DB3,1DB5,1DB6,1DB8,1DB4,1DB1,1DB2,1DB9,1DB10,1DB13,1DA11,
HACG01030845	A0A0B7ACL9	gi|42560362|gb|AAS20336.1|	1	53.8462	3	95	2344.86	1DB6,1DB7,
HACG01003546	A0A0B6Y3K1	gi|42560362|gb|AAS20336.1|	3	49.6454	7	438	8101.45	1DA1,1DA2,1DA4,1DA5,1DA6,1DA7,1DA8,1DA11,1DB1,1DB2,1DB3,1DB4,1DB5,1DB6,1DB7,1DA10,
HACG01039672	A0A0B7B0Y4	gi|431831576|gb|AGA92562.1|	5	45.6376	5	18	477.826	1DA10,1DB11,1DB13,1DB12,
HACG01026524	A0A0B6ZZY7	gi|443682473|gb|ELT87054.1|	4	21.5909	4	4	33.72	1DB9,
HACG01032976	A0A0B7AID3	gi|443686917|gb|ELT90035.1|	4	13.4731	4	4	65.48	1DB6,
HACG01011624	A0A0B6YQD8	gi|443689529|gb|ELT91902.1|	4	35.0877	4	4	38.84	1DB9,1DB10,
HACG01022967	A0A0B6ZN71	gi|443690943|gb|ELT92936.1|	5	25.4717	5	6	87.9033	1DB9,
HACG01047623	A0A0B7BNI1	gi|443692429|gb|ELT94023.1|	18	64.4928	18	112	2336.16	1DA1,1DA6,1DA10,1DB1,1DB3,1DB6,1DB7,1DA2,1DA4,1DA5,1DA3,1DB4,1DA8,1DB5,
HACG01022035	A0A0B6ZMG4	gi|443694956|gb|ELT95974.1|	3	30.3704	3	5	85.41	1DA4,1DB4,1DB1,
HACG01023411	A0A0B6ZR11	gi|443705209|gb|ELU01864.1|	4	34.4086	4	10	208.26	1DA8,1DB8,1DB9,1DB7,
HACG01015133	A0A0B6Z0I0	gi|443706726|gb|ELU02640.1|	3	9.89011	3	4	62.04	1DB1,1DB5,1DB6,
HACG01034502	A0A0B7AKI1	gi|443708569|gb|ELU03646.1|	12	50.3333	12	26	614.115	1DA6,1DA7,1DB7,1DB8,1DB1,1DB6,
HACG01039090	A0A0B7B1J4	gi|443718889|gb|ELU09307.1|	10	21.1896	10	12	124.47	1DA4,1DB4,
HACG01046675	A0A0B7BN32	gi|443720976|gb|ELU10481.1|	2	9.34959	2	2	49.84	1DB7,
HACG01046676	A0A0B7BMI2	gi|443720976|gb|ELU10481.1|	4	20.4461	4	4	63.57	1DB8,
HACG01023541	A0A0B6ZRG3	gi|443729373|gb|ELU15297.1|	3	18.75	4	13	96.1362	1DA9,1DB8,1DB9,1DB10,1DB1,
HACG01040525	A0A0B7B521	gi|443733604|gb|ELU17896.1|	6	11.4754	6	9	129.897	1DA3,1DB1,1DB3,
HACG01005800	A0A0B6YB02	gi|4504279|ref|NP_002098.1|	2	14.7059	3	12	95.3467	1DA10,1DB13,
HACG01040566	A0A0B7B588	gi|459180352|ref|XP_004226627.1|	2	63.6872	18	99	2062.55	1DA5,1DB4,1DB5,1DA9,
HACG01039020	A0A0B7B1B9	gi|46277000|gb|AAS86696.1|	2	6.25	2	2	75.45	1DB4,
HACG01041301	A0A0B7B779	gi|46277000|gb|AAS86696.1|	5	32.4444	5	10	212.65	1DB1,1DB7,1DB2,
HACG01028254	A0A0B7A2G3	gi|46277026|gb|AAS86709.1|	5	11.1111	5	7	96.4514	1DB1,1DB2,1DB3,
HACG01005178	A0A0B6Y7H5	gi|46277106|gb|AAS86749.1|	2	22.2222	2	3	27.2667	1DB11,1DB12,
HACG01049573	A0A0B7BU10	gi|46395316|dbj|BAD16595.1|	4	18.593	4	4	36.81	1DB9,
HACG01042913	A0A0B7B9R1	gi|464524|sp|Q05974.1|RAB1A_LYMST	13	74.1463	13	62	1165.91	1DA6,1DA7,1DB9,1DB10,1DA9,1DB1,1DB2,1DB8,1DA8,1DB7,
HACG01021622	A0A0B6ZJD3	gi|468860736|gb|AGH32328.1|	35	48.6226	35	119	2371.75	1DA1,1DA2,1DA3,1DA4,1DB1,1DB3,1DB4,1DB2,
HACG01040299	A0A0B7B1E4	gi|470643071|ref|XP_004326123.1|	3	82.1782	13	87	2069	1DA3,1DA4,1DA5,1DA7,1DB4,1DB5,1DA10,
HACG01023123	A0A0B6ZMZ4	gi|47202433|emb|CAF87387.1|	3	47.8261	3	3	32.0167	1DB5,
HACG01022146	A0A0B6ZMC0	gi|472824675|dbj|BAN09030.1|	31	62.3563	31	255	4212.89	1DA1,1DA2,1DA3,1DA4,1DA5,1DA6,1DA7,1DB1,1DB2,1DB3,1DB4,1DB5,1DB6,1DB7,
HACG01033263	A0A0B7AH49	gi|472824679|dbj|BAN09032.1|	4	66.6667	6	76	1264.34	1DA1,1DA2,1DA3,1DA4,1DA5,1DB1,1DB2,1DB3,1DB4,1DB5,1DB6,1DA6,
HACG01012785	A0A0B6YW04	gi|4929136|gb|AAD33872.1|AF141348_1	2	23.0769	4	5	113.51	1DB7,1DB11,
HACG01005021	A0A0B6Y7T6	gi|50593062|gb|AAT79342.1|	3	44.6429	3	14	481.46	1DA4,1DA5,1DA6,1DA7,1DA8,1DA9,1DA10,1DA11,1DB5,1DB6,1DB7,
HACG01022357	A0A0B6ZLE0	gi|51105030|gb|AAT97075.1|	2	16.8317	2	5	76.68	1DA3,1DB1,1DB3,
HACG01027528	A0A0B7A0L9	gi|51105058|gb|AAT97089.1|	2	45.0292	12	19	518.223	1DB5,
HACG01005256	A0A0B6Y8G4	gi|51105058|gb|AAT97089.1|	5	49.2386	6	18	481.509	1DA4,1DA5,1DA6,1DA7,1DA8,1DB4,1DB5,
HACG01027527	A0A0B7A1E2	gi|51105058|gb|AAT97089.1|	14	61.6628	19	39	840.644	1DA4,1DA5,1DB5,1DA7,1DB4,1DB1,1DB3,
HACG01013080	A0A0B6YWY0	gi|51105064|gb|AAT97092.1|	9	33.0961	9	12	242.43	1DA6,1DB6,
HACG01005098	A0A0B6Y7C4	gi|511880705|ref|XP_004760254.1|	2	26.8293	3	3	32.5067	1DB10,
HACG01012712	A0A0B6YTZ2	gi|513137512|gb|AGO20698.1|	14	40.2715	14	42	1115.34	1DA2,1DA3,1DA4,1DA5,1DB1,1DB4,1DB5,1DB6,
HACG01002083	A0A0B6XYQ1	gi|521024335|gb|EPQ06123.1|	13	49.7758	13	153	2421.27	1DA1,1DA2,1DA4,1DA5,1DA6,1DA7,1DA8,1DB1,1DB2,1DB3,1DB4,1DB6,1DB7,1DB8,1DB9,1DA11,1DA3,1DA9,1DB10,1DA10,1DA12,1DB5,
HACG01040831	A0A0B7B5W6	gi|524863982|ref|XP_005088830.1|	3	38.1579	3	13	210.072	1DA12,1DB11,1DB12,
HACG01040330	A0A0B7B4I1	gi|524863988|ref|XP_005088833.1|	8	51.626	8	13	255.422	1DA8,1DB8,
HACG01012641	A0A0B6YUN8	gi|524864066|ref|XP_005088871.1|	7	43.9394	7	23	305.687	1DA11,1DB11,1DB12,
HACG01033893	A0A0B7AIS9	gi|524864076|ref|XP_005088876.1|	10	15.8752	10	20	525.96	1DB1,1DB2,1DB3,
HACG01047139	A0A0B7BL15	gi|524864102|ref|XP_005088889.1|	2	20.1754	2	2	31.56	1DB11,1DB12,
HACG01002422	A0A0B6XYY7	gi|524864118|ref|XP_005088897.1|	8	59.6273	8	11	87.26	1DA9,1DB10,1DB13,
HACG01023731	A0A0B6ZRZ4	gi|524864130|ref|XP_005088903.1|	2	14.0127	2	6	211.357	1DA9,1DB9,1DB10,
HACG01021610	A0A0B6ZL85	gi|524864189|ref|XP_005088932.1|	2	13.4078	2	3	77.25	1DA8,1DB8,
HACG01033009	A0A0B7AFS2	gi|524864189|ref|XP_005088932.1|	2	17.7778	2	2	58.42	1DB9,
HACG01035391	A0A0B7AQI6	gi|524864475|ref|XP_005089073.1|	3	16.2602	3	3	56.4667	1DB7,
HACG01037960	A0A0B7AY39	gi|524864482|ref|XP_005089076.1|	3	9.64187	3	6	129.89	1DA4,1DA5,1DB6,
HACG01037961	A0A0B7AXN5	gi|524864482|ref|XP_005089076.1|	11	32.4519	11	13	265.508	1DB5,
HACG01037315	A0A0B7AWA0	gi|524864532|ref|XP_005089101.1|	8	25.5528	8	14	230.907	1DA5,1DB5,1DB6,
HACG01031772	A0A0B7ADA3	gi|524864548|ref|XP_005089109.1|	5	27.6	5	5	91.38	1DB8,
HACG01024276	A0A0B6ZTH2	gi|524864582|ref|XP_005089126.1|	2	9.73451	2	3	64.3867	1DA8,1DB8,
HACG01024580	A0A0B6ZUQ2	gi|524864620|ref|XP_005089145.1|	3	20.765	3	7	162.641	1DA11,1DB12,1DB11,
HACG01012671	A0A0B6YUR8	gi|524864622|ref|XP_005089146.1|	13	36.4486	13	36	938.55	1DA3,1DA4,1DB1,1DB5,1DB6,1DA5,1DB2,1DB4,
HACG01031161	A0A0B7ADB9	gi|524864626|ref|XP_005089148.1|	3	12.1387	3	5	124.28	1DA6,1DB6,
HACG01012022	A0A0B6YRW6	gi|524864630|ref|XP_005089150.1|	2	31.8182	2	7	110.91	1DA11,1DB11,1DB13,
HACG01023155	A0A0B6ZQM8	gi|524864630|ref|XP_005089150.1|	2	11.2	2	2	33.45	1DB12,
HACG01049708	A0A0B7BUA5	gi|524864665|ref|XP_005089167.1|	3	18.125	3	16	181.192	1DA10,1DB12,1DB13,1DB9,1DB11,
HACG01042091	A0A0B7B7K8	gi|524864808|ref|XP_005089238.1|	7	28.0967	7	12	130.153	1DA6,1DB7,
HACG01046178	A0A0B7BJD1	gi|524864840|ref|XP_005089254.1|	3	11.7647	3	3	79.5967	1DA7,1DB7,
HACG01040162	A0A0B7B2D8	gi|524864893|ref|XP_005089280.1|	2	11.4187	2	3	112.453	1DB6,
HACG01032022	A0A0B7AE37	gi|524864996|ref|XP_005089330.1|	4	18.5185	4	6	63.4433	1DA6,1DB6,1DB7,
HACG01038104	A0A0B7AVC2	gi|524865020|ref|XP_005089342.1|	6	18.2692	6	6	123.79	1DA4,1DB4,
HACG01038106	A0A0B7AY56	gi|524865020|ref|XP_005089342.1|	6	71.875	7	11	208.636	1DA4,1DB4,
HACG01035534	A0A0B7AMZ2	gi|524865136|ref|XP_005089400.1|	2	11.399	2	3	67.41	1DB5,
HACG01002065	A0A0B6Y0A9	gi|524865140|ref|XP_005089402.1|	9	52.2581	9	39	775.818	1DA10,1DA11,1DA12,1DB11,1DB12,1DB13,
HACG01034922	A0A0B7ALP7	gi|524865144|ref|XP_005089404.1|	2	12.3457	2	2	34.54	1DB10,
HACG01045729	A0A0B7BKD7	gi|524865306|ref|XP_005089483.1|	5	21.5686	5	8	127.52	1DA9,1DB9,1DB10,
HACG01027485	A0A0B7A303	gi|524865614|ref|XP_005089635.1|	2	8.65922	2	2	85.16	1DB4,
HACG01037564	A0A0B7ATU3	gi|524865670|ref|XP_005089662.1|	5	70.6667	5	97	1767.19	1DA1,1DA2,1DA3,1DA4,1DA5,1DA6,1DA7,1DA8,1DA9,1DA11,1DA12,1DB1,1DB2,1DB4,1DB5,1DB6,1DB7,1DB8,1DB9,1DB10,1DB11,
HACG01029047	A0A0B7A5L6	gi|524865670|ref|XP_005089662.1|	11	76.1261	15	137	2808.36	1DA7,1DA8,1DA11,1DB7,1DB8,1DB9,1DB10,1DB1,1DB11,1DB12,1DB13,
HACG01037565	A0A0B7AX16	gi|524865670|ref|XP_005089662.1|	12	85.6209	14	259	5953.02	1DA1,1DA2,1DA3,1DA4,1DA5,1DA6,1DA7,1DA8,1DA9,1DA10,1DA11,1DB1,1DB3,1DB5,1DB6,1DB7,1DB8,1DB9,1DB10,1DA12,1DB2,1DB4,
HACG01047141	A0A0B7BNT5	gi|524865813|ref|XP_005089733.1|	1	23.3766	4	6	119.297	1DB9,
HACG01047140	A0A0B7BPF8	gi|524865813|ref|XP_005089733.1|	2	23.3766	4	7	108.714	1DA8,1DB9,
HACG01031705	A0A0B7AF86	gi|524865869|ref|XP_005089760.1|	2	11.5556	2	2	45.05	1DB5,
HACG01044381	A0A0B7BG08	gi|524865955|ref|XP_005089803.1|	3	27.5132	4	11	123.904	1DA8,1DB8,
HACG01022125	A0A0B6ZMS2	gi|524865955|ref|XP_005089803.1|	12	55.3785	13	88	1018.63	1DA4,1DA6,1DA7,1DA8,1DB6,1DB7,1DB8,1DB9,
HACG01020036	A0A0B6ZGC5	gi|524866007|ref|XP_005089828.1|	3	4.10217	3	4	141.95	1DB2,
HACG01020650	A0A0B6ZIF7	gi|524866113|ref|XP_005089881.1|	6	22.1805	6	6	90.6367	1DB8,
HACG01004014	A0A0B6Y439	gi|524866188|ref|XP_005089918.1|	6	39.2045	6	16	280.97	1DA10,1DB10,1DB13,1DB4,
HACG01011825	A0A0B6YT53	gi|524866201|ref|XP_005089924.1|	2	13.3663	2	3	53.5367	1DA2,1DB2,
HACG01031867	A0A0B7ADK4	gi|524866201|ref|XP_005089924.1|	3	5.48425	3	3	46.9767	1DB1,1DB2,
HACG01001857	A0A0B6XXC8	gi|524866264|ref|XP_005089955.1|	2	7.56303	2	2	39.08	1DB5,
HACG01039135	A0A0B7B1M6	gi|524866272|ref|XP_005089958.1|	9	35.0554	9	21	425.515	1DA7,1DA8,1DB7,1DB9,
HACG01039136	A0A0B7B140	gi|524866272|ref|XP_005089958.1|	15	55.0186	15	22	319.296	1DB8,
HACG01022965	A0A0B6ZQ16	gi|524866300|ref|XP_005089972.1|	5	23.7931	5	16	300.772	1DA7,1DB7,1DB8,
HACG01026090	A0A0B6ZZ25	gi|524866304|ref|XP_005089974.1|	12	55.0676	12	34	896.67	1DA4,1DA6,1DA7,1DB7,1DB6,1DA8,
HACG01040431	A0A0B7B350	gi|524866376|ref|XP_005090010.1|	10	29.0526	10	26	917.065	1DA4,1DA5,1DA8,1DB1,1DB4,1DB5,1DA6,
HACG01037431	A0A0B7AW84	gi|524866478|ref|XP_005090060.1|	37	76.4244	37	455	8974.97	1DA1,1DA2,1DA3,1DA4,1DA5,1DA7,1DA8,1DB1,1DB2,1DB3,1DB4,1DB5,1DB6,1DB7,1DA6,1DB9,1DB13,1DA10,1DA9,1DB8,1DB10,1DB12,1DA11,1DB11,
HACG01002071	A0A0B6XZK9	gi|524866538|ref|XP_005090090.1|	6	33.8462	6	16	184.088	1DA8,1DA9,1DB9,1DB10,1DB13,
HACG01032272	A0A0B7AES8	gi|524866556|ref|XP_005090099.1|	12	23.8754	12	24	450.178	1DA11,1DB11,1DB12,1DB13,1DB5,1DB6,
HACG01026809	A0A0B6ZYE8	gi|524866585|ref|XP_005090113.1|	8	20.5505	8	9	130.723	1DA4,1DB4,
HACG01014492	A0A0B6YYZ2	gi|524866627|ref|XP_005090132.1|	8	47.5983	8	13	178.386	1DA8,1DB8,1DB9,
HACG01027444	A0A0B7A071	gi|524866665|ref|XP_005090151.1|	3	30.9524	3	8	171.135	1DA11,1DB11,1DB12,
HACG01005339	A0A0B6Y7R8	gi|524866733|ref|XP_005090185.1|	5	39.548	5	10	170.23	1DA6,1DB6,1DB7,
HACG01007288	A0A0B6YDD5	gi|524866733|ref|XP_005090185.1|	5	33.1169	5	7	102.889	1DA6,1DB6,1DB7,
HACG01041544	A0A0B7B4Y6	gi|524866780|ref|XP_005090207.1|	4	14.554	4	4	129.08	1DB6,
HACG01031485	A0A0B7AEH0	gi|524866798|ref|XP_005090215.1|	2	14.1176	2	2	75.31	1DB7,
HACG01029770	A0A0B7A9I1	gi|524866836|ref|XP_005090234.1|	3	27.3684	3	7	270.046	1DA4,1DA5,1DB5,1DB4,
HACG01029771	A0A0B7A7I6	gi|524866838|ref|XP_005090235.1|	4	31.1111	4	8	330.22	1DA4,1DA5,1DB1,1DB5,1DB6,
HACG01023435	A0A0B6ZRC9	gi|524866912|ref|XP_005090271.1|	10	35.8911	10	31	493.096	1DA4,1DA8,1DB1,1DB5,1DB6,1DA5,1DA6,
HACG01046469	A0A0B7BJ00	gi|524866934|ref|XP_005090282.1|	10	13.5556	11	12	401.77	1DB3,
HACG01046452	A0A0B7BMG5	gi|524866934|ref|XP_005090282.1|	11	11.7762	12	24	451.677	1DA1,1DA2,1DA3,1DB1,1DB2,1DB4,
HACG01043822	A0A0B7BCS3	gi|524866956|ref|XP_005090293.1|	4	14.2582	6	10	220.9	1DA4,1DB2,1DB3,1DB4,
HACG01002510	A0A0B6Y1G7	gi|524866978|ref|XP_005090304.1|	2	44.5783	3	8	183.495	1DB11,1DB12,
HACG01002173	A0A0B6XYV8	gi|524866978|ref|XP_005090304.1|	3	41.573	3	10	266.76	1DA12,1DB11,1DB12,
HACG01026422	A0A0B6ZY47	gi|524866999|ref|XP_005090313.1|	2	7.70833	2	2	50.73	1DB5,
HACG01042776	A0A0B7BBH3	gi|524867048|ref|XP_005090337.1|	8	62.4339	9	19	259.86	1DA9,1DB10,1DB13,
HACG01039172	A0A0B7AZK7	gi|524867050|ref|XP_005090338.1|	7	45.4082	8	19	207.966	1DA9,1DB9,1DB10,
HACG01049741	A0A0B7BW67	gi|524867173|ref|XP_005090399.1|	2	8.05861	2	2	36.4	1DB7,
HACG01012364	A0A0B6YSI9	gi|524867383|ref|XP_005090503.1|	3	9.03733	3	3	50.0533	1DB2,1DB3,
HACG01016836	A0A0B6Z6Y9	gi|524867407|ref|XP_005090515.1|	2	8.03859	2	2	40.4	1DB7,
HACG01036515	A0A0B7AR76	gi|524867514|ref|XP_005090568.1|	12	36.6029	12	25	545.67	1DA5,1DB5,1DB6,1DA7,1DB1,
HACG01040599	A0A0B7B2C3	gi|524867549|ref|XP_005090585.1|	6	37.3077	6	21	435.595	1DA7,1DB7,1DB8,1DB9,1DB1,
HACG01030849	A0A0B7A9N6	gi|524867567|ref|XP_005090594.1|	2	9.50119	2	2	74.75	1DB2,1DB4,
HACG01028830	A0A0B7A6R9	gi|524867567|ref|XP_005090594.1|	4	19.1549	4	4	48.18	1DB2,
HACG01012058	A0A0B6YRS0	gi|524867573|ref|XP_005090597.1|	19	66.4141	19	68	1544.1	1DA4,1DA5,1DA6,1DA7,1DA12,1DB1,1DB3,1DB4,1DB6,1DB7,1DB11,1DB12,1DB5,
HACG01039373	A0A0B7AZL8	gi|524867613|ref|XP_005090615.1|	11	19.0311	11	23	578.018	1DA1,1DA3,1DB3,1DA4,1DA5,1DB1,1DB4,
HACG01040507	A0A0B7B3D8	gi|524867613|ref|XP_005090615.1|	20	15.1278	20	35	993.13	1DA1,1DA2,1DB2,1DA3,1DB1,1DB3,
HACG01039374	A0A0B7AYT6	gi|524867613|ref|XP_005090615.1|	32	40.9722	32	42	1015.35	1DA2,1DB2,
HACG01018985	A0A0B6ZDP9	gi|524867640|ref|XP_005090628.1|	3	26.4151	3	6	155.427	1DA4,1DB4,1DB5,
HACG01036561	A0A0B7ARG0	gi|524867701|ref|XP_005090658.1|	6	17.1946	6	8	157.39	1DA4,1DB5,
HACG01047863	A0A0B7BP42	gi|524867753|ref|XP_005090684.1|	5	19.6581	12	16	319.147	1DA3,1DB4,1DA4,
HACG01047878	A0A0B7BP57	gi|524867755|ref|XP_005090685.1|	2	9.17874	6	6	182.653	1DB2,
HACG01047855	A0A0B7BRB3	gi|524867757|ref|XP_005090686.1|	8	10.7686	19	26	549.967	1DA3,1DB1,1DB4,1DA4,
HACG01047879	A0A0B7BN53	gi|524867757|ref|XP_005090686.1|	15	28.7108	29	53	1202.73	1DA1,1DA2,1DB1,1DB2,1DB3,
HACG01047869	A0A0B7BRD5	gi|524867763|ref|XP_005090689.1|	2	8.65922	5	5	182.04	1DB3,
HACG01047856	A0A0B7BQS2	gi|524867763|ref|XP_005090689.1|	6	8.895	13	21	428.636	1DA2,1DB3,1DB7,1DB9,1DB10,
HACG01047857	A0A0B7BP98	gi|524867763|ref|XP_005090689.1|	14	16.4224	29	34	785.114	1DB2,1DB9,1DB10,
HACG01042487	A0A0B7B8W2	gi|524867786|ref|XP_005090700.1|	4	9.48905	4	8	255.845	1DA12,1DB11,1DB12,1DB4,1DB5,
HACG01031625	A0A0B7AF15	gi|524867792|ref|XP_005090703.1|	4	8.55019	4	4	94.71	1DB5,
HACG01005861	A0A0B6YA76	gi|524867882|ref|XP_005090748.1|	2	27.1739	2	7	159.023	1DA9,1DA11,1DA12,1DB11,1DB12,
HACG01029219	A0A0B7A553	gi|524868003|ref|XP_005090808.1|	6	29.8701	7	11	261.922	1DA7,1DB7,
HACG01029215	A0A0B7A7Y2	gi|524868003|ref|XP_005090808.1|	8	35.5049	10	44	779.743	1DA7,1DA8,1DB7,1DB8,1DB9,1DB10,
HACG01029217	A0A0B7A605	gi|524868005|ref|XP_005090809.1|	2	46.8354	3	8	130.18	1DB8,1DB9,
HACG01016582	A0A0B6Z527	gi|524868037|ref|XP_005090825.1|	5	23.4637	5	10	96.64	1DB1,1DB7,1DB8,1DB9,
HACG01042448	A0A0B7BAI5	gi|524868057|ref|XP_005090835.1|	15	11.9813	15	20	329.09	1DA4,1DB4,1DB2,
HACG01026718	A0A0B6ZYE6	gi|524868093|ref|XP_005090853.1|	19	27.6667	19	28	612.391	1DA3,1DB3,1DB1,
HACG01041578	A0A0B7B623	gi|524868127|ref|XP_005090870.1|	2	8.64662	2	2	73.77	1DB7,
HACG01028856	A0A0B7A6S9	gi|524868280|ref|XP_005090944.1|	2	4.13081	2	2	54.96	1DB6,
HACG01042226	A0A0B7B9X2	gi|524868297|ref|XP_005090952.1|	4	49.0446	4	5	126.83	1DA9,1DB10,
HACG01030347	A0A0B7A953	gi|524868395|ref|XP_005091000.1|	2	6.04651	2	2	91.77	1DB5,
HACG01038201	A0A0B7AYD5	gi|524868395|ref|XP_005091000.1|	4	11.1607	4	4	59.34	1DB5,
HACG01035861	A0A0B7APE0	gi|524868522|ref|XP_005091063.1|	7	16.4938	15	16	252.588	1DB3,
HACG01030298	A0A0B7A8Q8	gi|524868522|ref|XP_005091063.1|	35	41.7722	40	103	2395.5	1DA2,1DA3,1DA4,1DB1,1DB2,1DB3,1DB4,1DB7,1DB8,
HACG01028706	A0A0B7A6C0	gi|524868530|ref|XP_005091067.1|	5	16.3895	5	6	134.61	1DA5,1DB5,
HACG01011569	A0A0B6YQA8	gi|524868604|ref|XP_005091103.1|	5	28.4722	6	8	88.225	1DB10,
HACG01035900	A0A0B7AS67	gi|524868651|ref|XP_005091126.1|	5	18.0832	5	5	101.43	1DA4,1DB4,
HACG01041635	A0A0B7B8W1	gi|524868717|ref|XP_005091158.1|	4	5.07663	4	4	95.56	1DB3,
HACG01017523	A0A0B6Z789	gi|524868787|ref|XP_005091193.1|	4	13.544	4	7	142.78	1DA5,1DB5,1DB6,
HACG01015159	A0A0B6Z0D1	gi|524868815|ref|XP_005091207.1|	4	25	4	9	151.986	1DA9,1DB10,1DB9,
HACG01024406	A0A0B6ZTU3	gi|524868832|ref|XP_005091215.1|	3	14.9682	3	4	108.68	1DB1,1DB7,
HACG01026082	A0A0B6ZXC6	gi|524868842|ref|XP_005091219.1|	7	36.2069	7	24	406.73	1DA7,1DA8,1DA9,1DB8,1DB9,1DB10,
HACG01036356	A0A0B7AT99	gi|524868850|ref|XP_005091223.1|	2	9.66387	2	3	88.3267	1DA9,1DB9,
HACG01019154	A0A0B6ZBU0	gi|524868888|ref|XP_005091242.1|	1	28.6822	2	4	166.49	1DB11,1DB12,
HACG01046305	A0A0B7BLD9	gi|524868888|ref|XP_005091242.1|	2	51.938	3	5	151.56	1DB11,1DB12,
HACG01024012	A0A0B6ZR85	gi|524868892|ref|XP_005091244.1|	6	29.5082	6	16	297.652	1DA2,1DA7,1DA8,1DA9,1DB7,1DB8,1DB1,
HACG01012257	A0A0B6YSM2	gi|524868942|ref|XP_005091269.1|	3	42.4779	3	3	66.23	1DB6,
HACG01025283	A0A0B6ZU51	gi|524868962|ref|XP_005091279.1|	2	6.40244	2	2	21.66	1DB5,
HACG01037512	A0A0B7AUV0	gi|524868977|ref|XP_005091286.1|	9	37.6997	9	36	452.904	1DA1,1DA2,1DA3,1DA4,1DA5,1DA6,1DB6,1DB7,1DA7,1DA8,1DB1,
HACG01025796	A0A0B6ZXT2	gi|524868983|ref|XP_005091289.1|	2	14.4	3	3	80.4767	1DB8,
HACG01020361	A0A0B6ZH67	gi|524868983|ref|XP_005091289.1|	5	51.049	5	15	135.9	1DA7,1DA8,1DB8,
HACG01041305	A0A0B7B7S3	gi|524868994|ref|XP_005091294.1|	3	11.7845	3	6	252.45	1DB1,1DB2,1DB6,1DB7,
HACG01017710	A0A0B6ZA46	gi|524869145|ref|XP_005091369.1|	3	40.7895	3	9	210.613	1DA12,1DB11,1DB12,
HACG01035935	A0A0B7AS43	gi|524869199|ref|XP_005091396.1|	12	50	12	30	883.25	1DA6,1DA7,1DB7,1DB1,1DB8,
HACG01031438	A0A0B7AC03	gi|524869203|ref|XP_005091398.1|	9	16.9096	9	11	136.799	1DB3,1DB4,
HACG01040763	A0A0B7B3L1	gi|524869203|ref|XP_005091398.1|	9	13.1805	9	10	158.81	1DB4,
HACG01043440	A0A0B7BDP5	gi|524869207|ref|XP_005091400.1|	3	25.0951	4	6	131.56	1DB1,1DB2,
HACG01046262	A0A0B7BJR5	gi|524869207|ref|XP_005091400.1|	9	9.53069	10	24	358.357	1DA1,1DB1,1DA2,1DB2,
HACG01030281	A0A0B7AAU6	gi|524869284|ref|XP_005091437.1|	3	16.5854	3	11	200.771	1DA9,1DB9,1DB10,1DB13,
HACG01023512	A0A0B6ZP98	gi|524869296|ref|XP_005091443.1|	2	10.9524	2	3	86.62	1DB9,1DB10,
HACG01035507	A0A0B7AP59	gi|524869323|ref|XP_005091456.1|	3	8.62745	3	3	69.9867	1DA4,1DB5,
HACG01034296	A0A0B7AME2	gi|524869393|ref|XP_005091491.1|	3	27.5	3	8	186.59	1DA9,1DB9,1DB8,
HACG01024680	A0A0B6ZUN2	gi|524869393|ref|XP_005091491.1|	7	28.1513	7	10	136.18	1DA7,1DA8,1DB9,1DB8,
HACG01011496	A0A0B6YRG0	gi|524869453|ref|XP_005091519.1|	6	21.0526	6	8	103.775	1DA7,1DB8,1DB7,
HACG01006599	A0A0B6YBE6	gi|524869485|ref|XP_005091535.1|	4	33.3333	4	10	260.63	1DA4,1DB4,1DB5,
HACG01039258	A0A0B7AZB3	gi|524869485|ref|XP_005091535.1|	5	11.2299	5	5	89.39	1DB4,
HACG01047713	A0A0B7BMS0	gi|524869485|ref|XP_005091535.1|	27	57.2451	27	131	2189.08	1DA2,1DA3,1DA4,1DA5,1DA12,1DB1,1DB2,1DB3,1DB4,1DB5,1DA6,
HACG01005564	A0A0B6Y8I5	gi|524869517|ref|XP_005091551.1|	2	7.6412	2	4	54.57	1DA7,1DB7,
HACG01044614	A0A0B7BDY0	gi|524869549|ref|XP_005091567.1|	2	2.22447	2	2	34.04	1DA1,
HACG01044616	A0A0B7BGR4	gi|524869549|ref|XP_005091567.1|	4	22.681	29	51	1097.73	1DB1,1DB2,
HACG01044615	A0A0B7BH80	gi|524869549|ref|XP_005091567.1|	8	24.4019	31	57	1150.26	1DA2,1DB1,1DB2,1DB3,
HACG01031464	A0A0B7ABD9	gi|524869633|ref|XP_005091608.1|	3	11.2805	3	4	76.68	1DA7,1DB7,
HACG01017690	A0A0B6ZA32	gi|524869798|ref|XP_005091688.1|	2	7.84314	2	3	76.8133	1DA9,1DB10,
HACG01038260	A0A0B7AZ25	gi|524869987|ref|XP_005091780.1|	8	55.0459	8	14	233.88	1DA11,1DB11,1DB12,1DB13,
HACG01046732	A0A0B7BL25	gi|524870008|ref|XP_005091790.1|	5	30.0847	5	9	99.8411	1DA7,1DB7,1DB8,
HACG01037616	A0A0B7AWS9	gi|524870028|ref|XP_005091800.1|	4	14.0127	4	10	184.81	1DA1,1DA3,1DA4,1DA2,
HACG01037615	A0A0B7AX72	gi|524870028|ref|XP_005091800.1|	12	35.9768	12	27	651.111	1DA5,1DA8,1DB3,1DB4,1DB5,
HACG01025814	A0A0B6ZVM9	gi|524870116|ref|XP_005091844.1|	2	18.9873	2	5	124.15	1DB10,1DB13,
HACG01025474	A0A0B6ZUM7	gi|524870146|ref|XP_005091859.1|	2	28.3186	3	3	66.6567	1DB7,
HACG01013076	A0A0B6YW24	gi|524870146|ref|XP_005091859.1|	5	28.9286	6	7	115.15	1DA7,1DB7,
HACG01021181	A0A0B6ZJL1	gi|524870191|ref|XP_005091881.1|	11	45.4277	11	48	770.038	1DA6,1DA7,1DB1,1DB7,1DB8,1DB2,1DB6,1DB9,1DB3,
HACG01043179	A0A0B7BD31	gi|524870213|ref|XP_005091892.1|	2	35.2113	2	19	365.108	1DA9,1DA10,1DA11,1DA12,1DB11,1DB12,
HACG01025850	A0A0B6ZY78	gi|524870217|ref|XP_005091894.1|	3	19.3548	3	5	111.29	1DA8,1DB9,
HACG01049555	A0A0B7BW87	gi|524870300|ref|XP_005091935.1|	11	55.914	11	27	433.03	1DA8,1DB9,1DA9,1DB8,1DB10,1DB7,
HACG01032444	A0A0B7AE82	gi|524870306|ref|XP_005091938.1|	2	4.11348	2	2	29.79	1DB4,
HACG01036056	A0A0B7ASG5	gi|524870317|ref|XP_005091943.1|	3	6.81818	3	5	90.2	1DA4,1DB4,
HACG01020464	A0A0B6ZFD7	gi|524870519|ref|XP_005092044.1|	2	5.24412	2	2	42.08	1DB1,
HACG01034422	A0A0B7AL36	gi|524870720|ref|XP_005092142.1|	2	8.66667	2	2	69.16	1DB7,
HACG01005459	A0A0B6Y840	gi|524870720|ref|XP_005092142.1|	3	14	3	5	247.65	1DA7,1DB7,
HACG01044534	A0A0B7BGU4	gi|524870722|ref|XP_005092143.1|	10	51.2195	10	40	914.145	1DA7,1DA8,1DB8,1DB9,1DB1,1DB2,1DB6,1DB7,
HACG01015368	A0A0B6Z133	gi|524870754|ref|XP_005092159.1|	2	19.403	2	2	41.69	1DB9,
HACG01043149	A0A0B7BD10	gi|524870758|ref|XP_005092161.1|	2	7.78443	2	2	56.47	1DB1,
HACG01032271	A0A0B7AGG2	gi|524870815|ref|XP_005092188.1|	7	39.0909	7	14	225.9	1DA8,1DB8,1DB9,
HACG01046099	A0A0B7BI09	gi|524870819|ref|XP_005092190.1|	3	5.58739	3	3	52.9533	1DB3,
HACG01020278	A0A0B6ZF29	gi|524870833|ref|XP_005092197.1|	3	11.8252	3	4	133.85	1DA6,1DB6,
HACG01005165	A0A0B6Y9C2	gi|524870848|ref|XP_005092204.1|	19	30.0135	19	21	341.96	1DA4,1DB4,
HACG01049237	A0A0B7BT72	gi|524870886|ref|XP_005092223.1|	11	66.6667	11	145	3783.31	1DA7,1DA8,1DA9,1DA10,1DA12,1DB10,1DB11,1DB12,1DB13,1DA11,1DB9,1DB4,
HACG01037302	A0A0B7AU65	gi|524870909|ref|XP_005092234.1|	3	11.0714	3	3	55.26	1DB8,
HACG01015833	A0A0B6Z2C9	gi|524870945|ref|XP_005092251.1|	5	40.7407	5	13	125.297	1DA11,1DB11,1DB12,1DB13,
HACG01045334	A0A0B7BFV9	gi|524870955|ref|XP_005092256.1|	5	19.883	5	9	247.013	1DA6,1DB6,1DB7,
HACG01037708	A0A0B7AUR0	gi|524871130|ref|XP_005092341.1|	4	8.49558	4	4	107.98	1DB4,
HACG01016977	A0A0B6Z630	gi|524871134|ref|XP_005092343.1|	17	44.2013	17	58	1385.17	1DA4,1DB1,1DB4,1DB5,1DB6,1DA5,1DB3,1DA10,
HACG01011248	A0A0B6YPD9	gi|524871144|ref|XP_005092348.1|	7	24.3956	7	9	155.79	1DA4,1DB5,
HACG01034567	A0A0B7ALK6	gi|524871172|ref|XP_005092362.1|	5	12.766	5	7	60.78	1DA5,1DB5,1DB6,
HACG01003261	A0A0B6Y2Q3	gi|524871178|ref|XP_005092365.1|	8	36.5672	8	17	206.895	1DA7,1DA8,1DB7,1DB8,
HACG01030377	A0A0B7A988	gi|524871180|ref|XP_005092366.1|	9	45.8333	9	22	384.013	1DA10,1DB11,1DB13,1DA11,1DB10,1DB12,
HACG01044474	A0A0B7BDF3	gi|524871250|ref|XP_005092401.1|	2	27.2727	2	4	95.69	1DA11,1DA12,1DB12,
HACG01043472	A0A0B7BBS6	gi|524871258|ref|XP_005092404.1|	2	5.22244	2	3	87.14	1DB4,1DB5,
HACG01040080	A0A0B7B4D9	gi|524871372|ref|XP_005092459.1|	4	20.6897	4	8	151.085	1DA6,1DA7,1DB7,1DB6,
HACG01034035	A0A0B7ALU2	gi|524871394|ref|XP_005092470.1|	2	13.8889	2	4	86.62	1DB1,1DB8,
HACG01049053	A0A0B7BSG0	gi|524871402|ref|XP_005092474.1|	1	27.6995	9	10	298.52	1DB6,
HACG01049051	A0A0B7BU60	gi|524871402|ref|XP_005092474.1|	9	30.4245	10	27	729.204	1DA5,1DA6,1DB6,1DB1,1DB7,1DB5,
HACG01025704	A0A0B6ZVC9	gi|524871449|ref|XP_005092497.1|	7	13.8643	7	10	161.5	1DB3,1DB4,
HACG01036173	A0A0B7AR25	gi|524871451|ref|XP_005092498.1|	2	6.40244	2	2	59.76	1DB3,
HACG01019808	A0A0B6ZDP7	gi|524871453|ref|XP_005092499.1|	8	23.2099	8	11	128.014	1DA5,1DA6,1DB1,1DB5,1DB6,
HACG01041474	A0A0B7B4R0	gi|524871463|ref|XP_005092504.1|	5	36.5672	5	12	132.573	1DB8,1DB9,1DB10,
HACG01027687	A0A0B7A1S4	gi|524871469|ref|XP_005092507.1|	3	6.58436	3	3	41.3367	1DB4,
HACG01031012	A0A0B7AB47	gi|524871513|ref|XP_005092529.1|	1	7.66667	2	2	37.55	1DB7,
HACG01031013	A0A0B7AAU4	gi|524871513|ref|XP_005092529.1|	7	28.3333	8	9	181.233	1DA7,1DB7,
HACG01043458	A0A0B7BAD1	gi|524871596|ref|XP_005092570.1|	2	2.27704	2	3	133.447	1DB3,
HACG01031943	A0A0B7ADG1	gi|524871596|ref|XP_005092570.1|	4	10.0223	4	16	316.502	1DA2,1DA4,1DA11,1DA12,1DB1,1DB4,1DB5,1DB6,1DB2,1DB3,
HACG01037815	A0A0B7AXP4	gi|524871599|ref|XP_005092571.1|	2	7.17822	2	2	66.47	1DB5,
HACG01040955	A0A0B7B6S9	gi|524871609|ref|XP_005092576.1|	8	13.5514	8	10	260.14	1DB3,1DB4,1DB5,
HACG01038894	A0A0B7AXP1	gi|524871619|ref|XP_005092581.1|	6	10.3044	6	13	310.744	1DA3,1DB3,1DB7,1DB2,1DB10,1DB13,
HACG01044565	A0A0B7BGY9	gi|524871621|ref|XP_005092582.1|	4	42.9245	4	6	95.0933	1DA4,1DA5,1DB5,
HACG01044560	A0A0B7BGX0	gi|524871621|ref|XP_005092582.1|	4	25.6506	5	12	185.087	1DA4,1DB4,1DA5,
HACG01044568	A0A0B7BEP4	gi|524871621|ref|XP_005092582.1|	5	21.4286	5	12	165.267	1DB5,1DB6,
HACG01044557	A0A0B7BEY7	gi|524871621|ref|XP_005092582.1|	11	51.0569	22	62	1330.28	1DA4,1DB4,1DB5,
HACG01044556	A0A0B7BGH8	gi|524871621|ref|XP_005092582.1|	13	53.4247	22	93	1930.22	1DA1,1DA3,1DA5,1DA6,1DA8,1DB1,1DB4,1DB5,1DB6,1DB7,1DB8,1DB9,1DB3,1DB11,
HACG01039614	A0A0B7AZI3	gi|524871635|ref|XP_005092589.1|	2	9.36556	2	3	99.02	1DB1,1DB2,
HACG01040425	A0A0B7B592	gi|524871674|ref|XP_005092608.1|	6	31.4159	6	20	302.75	1DA7,1DA9,1DB9,1DA8,1DB10,
HACG01044882	A0A0B7BFS9	gi|524871732|ref|XP_005092637.1|	7	6.21336	7	21	449.75	1DA1,1DA2,1DB1,1DB2,
HACG01034649	A0A0B7ALP9	gi|524871748|ref|XP_005092645.1|	7	60.9195	7	24	452.385	1DA8,1DA9,1DB9,1DB10,
HACG01017360	A0A0B6Z915	gi|524871774|ref|XP_005092658.1|	6	35.0806	6	10	213.75	1DA7,1DA8,1DB9,1DB8,
HACG01002370	A0A0B6Y111	gi|524871885|ref|XP_005092713.1|	11	35.061	11	20	276.19	1DA6,1DB6,1DB7,
HACG01033766	A0A0B7AKU9	gi|524871930|ref|XP_005092735.1|	3	25.2747	3	5	85.12	1DA2,1DB2,
HACG01033767	A0A0B7AJ61	gi|524871930|ref|XP_005092735.1|	4	24.0175	4	10	202.26	1DA1,1DA2,1DB2,1DB1,
HACG01033768	A0A0B7AIJ3	gi|524871930|ref|XP_005092735.1|	11	23.3333	11	20	478.92	1DA1,1DA2,1DB1,1DB2,
HACG01033771	A0A0B7AKV6	gi|524871930|ref|XP_005092735.1|	16	22.4558	16	33	692.115	1DA1,1DA2,1DB1,1DB2,
HACG01028267	A0A0B7A3B4	gi|524872186|ref|XP_005092857.1|	3	9.73085	3	3	137.47	1DA3,1DB1,
HACG01028666	A0A0B7A682	gi|524872186|ref|XP_005092857.1|	5	19.598	5	5	60.13	1DB3,
HACG01028667	A0A0B7A4I4	gi|524872186|ref|XP_005092857.1|	7	21.0728	8	9	242.009	1DA3,1DB3,
HACG01028268	A0A0B7A2V0	gi|524872186|ref|XP_005092857.1|	9	16.0544	9	12	361.507	1DB2,1DB3,
HACG01021300	A0A0B6ZK88	gi|524872284|ref|XP_005092905.1|	4	22.093	4	9	192.033	1DA8,1DA9,1DB9,1DB10,
HACG01022902	A0A0B6ZMZ3	gi|524872286|ref|XP_005092906.1|	9	21.4634	9	17	264.907	1DA4,1DA5,1DB1,1DB5,1DB2,1DB4,1DB6,
HACG01002368	A0A0B6XZD3	gi|524872340|ref|XP_005092932.1|	4	23.5507	4	4	81.34	1DB7,
HACG01036656	A0A0B7AU52	gi|524872436|ref|XP_005092980.1|	5	12.5261	6	6	128.927	1DB5,
HACG01011096	A0A0B6YQE2	gi|524872446|ref|XP_005092985.1|	3	16.092	3	4	76.74	1DA7,1DB7,
HACG01005361	A0A0B6Y8Q8	gi|524872452|ref|XP_005092988.1|	2	17.801	2	4	78.32	1DB10,1DB13,
HACG01045727	A0A0B7BI84	gi|524872460|ref|XP_005092992.1|	6	31.7073	6	9	246.78	1DA7,1DB7,
HACG01037666	A0A0B7AWV9	gi|524872578|ref|XP_005093050.1|	2	3.69967	2	3	106.723	1DA1,1DA2,
HACG01037665	A0A0B7AXB1	gi|524872578|ref|XP_005093050.1|	7	29.9238	23	46	1181.92	1DB1,1DB2,1DB3,
HACG01037667	A0A0B7AV89	gi|524872578|ref|XP_005093050.1|	16	37.4394	32	62	1549.13	1DB1,1DB2,
HACG01034640	A0A0B7ANN1	gi|524872604|ref|XP_005093063.1|	2	6.19469	2	3	59.8633	1DB6,1DB7,
HACG01038229	A0A0B7AZ00	gi|524872616|ref|XP_005093069.1|	8	20.6371	13	15	249.567	1DB4,
HACG01020044	A0A0B6ZE82	gi|524872618|ref|XP_005093070.1|	5	16.4756	10	14	204.16	1DA4,1DB4,
HACG01038223	A0A0B7AW86	gi|524872622|ref|XP_005093072.1|	5	11.5057	6	6	76.6167	1DA4,1DB3,
HACG01013104	A0A0B6YUN0	gi|524872672|ref|XP_005093096.1|	3	54.8673	3	5	99.36	1DB11,1DB12,
HACG01045747	A0A0B7BIA3	gi|524872674|ref|XP_005093097.1|	12	38.3901	12	17	340.866	1DA6,1DB7,
HACG01042100	A0A0B7B9L4	gi|524872725|ref|XP_005093120.1|	5	15.6171	5	10	282.13	1DA5,1DA6,1DB6,
HACG01004368	A0A0B6Y553	gi|524872727|ref|XP_005093121.1|	3	27.9661	3	3	58.33	1DB9,
HACG01037808	A0A0B7AUY2	gi|524872775|ref|XP_005093144.1|	3	6.28183	3	3	61.86	1DB4,
HACG01012661	A0A0B6YUQ7	gi|524872801|ref|XP_005093157.1|	2	51.2953	9	20	345.14	1DB9,1DB10,
HACG01026880	A0A0B7A1B0	gi|524872801|ref|XP_005093157.1|	7	61.4583	11	37	807.772	1DA8,1DB9,1DB10,1DA9,
HACG01034122	A0A0B7AK85	gi|524872805|ref|XP_005093159.1|	3	17.9104	3	6	139.703	1DA7,1DB8,1DB7,
HACG01025991	A0A0B6ZYF1	gi|524872832|ref|XP_005093172.1|	7	24	7	10	171.53	1DA6,1DB6,
HACG01019477	A0A0B6ZD02	gi|524872910|ref|XP_005093210.1|	2	11.0132	2	3	115.523	1DA7,1DB7,
HACG01037927	A0A0B7AVW4	gi|524872922|ref|XP_005093216.1|	19	42.6386	20	75	1573.4	1DA1,1DA4,1DA5,1DA6,1DA7,1DA8,1DA9,1DA12,1DB5,1DB6,1DA3,1DB1,1DB4,1DB3,
HACG01036606	A0A0B7AU19	gi|524872934|ref|XP_005093222.1|	3	19.337	3	3	53.27	1DB9,
HACG01029281	A0A0B7A816	gi|524873045|ref|XP_005093276.1|	5	20.6731	5	19	307.038	1DB1,1DB10,1DB13,1DB2,1DB8,1DB9,1DB11,
HACG01049596	A0A0B7BVU8	gi|524873075|ref|XP_005093291.1|	3	21.4724	3	10	184.47	1DA10,1DB10,1DB11,1DB13,
HACG01049541	A0A0B7BVL0	gi|524873087|ref|XP_005093297.1|	12	48.7085	12	35	625.696	1DA7,1DA8,1DB8,1DB9,1DA12,1DB12,1DB11,1DB1,
HACG01046950	A0A0B7BNS7	gi|524873152|ref|XP_005093328.1|	2	3.93701	2	2	45.38	1DB7,
HACG01024107	A0A0B6ZRK2	gi|524873169|ref|XP_005093336.1|	14	38.6707	14	24	474.787	1DA6,1DA7,1DB7,
HACG01021976	A0A0B6ZLT4	gi|524873194|ref|XP_005093348.1|	3	6.03113	3	3	67.1833	1DB5,
HACG01016400	A0A0B6Z6B4	gi|524873315|ref|XP_005093407.1|	5	26.3636	5	5	104.99	1DB8,
HACG01002006	A0A0B6XZC1	gi|524873378|ref|XP_005093436.1|	5	20	5	12	248.833	1DB1,1DB2,1DB3,1DB4,1DB5,
HACG01032449	A0A0B7AE88	gi|524873501|ref|XP_005093496.1|	2	3.25444	2	2	50.33	1DB3,1DB4,
HACG01030985	A0A0B7AD12	gi|524873538|ref|XP_005093514.1|	14	34.3313	14	21	503.489	1DA5,1DA7,1DB5,
HACG01004352	A0A0B6Y4G6	gi|524873600|ref|XP_005093544.1|	12	62.6667	12	49	421.288	1DA7,1DA9,1DA10,1DB10,1DB11,1DB13,1DB12,
HACG01024226	A0A0B6ZTD1	gi|524873738|ref|XP_005093612.1|	4	34.7458	5	6	46.8	1DB9,
HACG01048125	A0A0B7BS84	gi|524873738|ref|XP_005093612.1|	5	35.3659	6	6	73.9067	1DB9,
HACG01018361	A0A0B6ZBB0	gi|524873824|ref|XP_005093654.1|	1	10.3139	2	3	88.2233	1DA7,1DB7,
HACG01032794	A0A0B7AF67	gi|524873824|ref|XP_005093654.1|	4	19.1358	5	7	164.027	1DA7,1DB7,
HACG01033545	A0A0B7AIK5	gi|524873848|ref|XP_005093666.1|	4	10.8659	4	4	75.76	1DB3,
HACG01005406	A0A0B6Y8V9	gi|524873892|ref|XP_005093688.1|	2	36.5385	2	7	310.796	1DA5,1DA6,1DA7,1DB8,
HACG01038910	A0A0B7B0X8	gi|524873892|ref|XP_005093688.1|	5	28.3154	5	10	265.7	1DA6,1DA7,1DB8,1DB7,
HACG01004410	A0A0B6Y706	gi|524873900|ref|XP_005093692.1|	4	17.9931	4	5	58.23	1DA7,1DB8,
HACG01027000	A0A0B7A1N8	gi|524873900|ref|XP_005093692.1|	6	29.8932	6	10	164.19	1DA8,1DB8,
HACG01033720	A0A0B7AKP7	gi|524873954|ref|XP_005093719.1|	2	6.08108	2	2	67.15	1DB4,
HACG01017488	A0A0B6Z6W7	gi|524873970|ref|XP_005093727.1|	3	42.8571	3	5	91.38	1DB8,1DB9,
HACG01038118	A0A0B7AVY7	gi|524873980|ref|XP_005093732.1|	3	9.47075	3	3	57.8067	1DB3,
HACG01038119	A0A0B7AVD4	gi|524873980|ref|XP_005093732.1|	6	10.1248	6	6	150.573	1DB3,
HACG01041125	A0A0B7B7D7	gi|524874037|ref|XP_005093760.1|	3	30.5556	3	6	108.297	1DB11,1DB12,
HACG01046231	A0A0B7BL72	gi|524874055|ref|XP_005093769.1|	11	18.6262	11	15	221.447	1DB2,1DB3,
HACG01044483	A0A0B7BED8	gi|524874065|ref|XP_005093774.1|	16	69.0236	16	26	673.593	1DA6,1DB7,
HACG01041627	A0A0B7B6K3	gi|524874093|ref|XP_005093787.1|	6	42.8571	6	12	197.627	1DA10,1DB10,1DB13,
HACG01028270	A0A0B7A582	gi|524874093|ref|XP_005093787.1|	7	60	7	20	274.12	1DA10,1DB10,1DB11,1DB13,
HACG01047775	A0A0B7BR48	gi|524874093|ref|XP_005093787.1|	7	47.8788	7	27	390.38	1DA9,1DA10,1DB13,1DB10,
HACG01019320	A0A0B6ZEM9	gi|524874148|ref|XP_005093814.1|	4	22.1198	4	9	111.227	1DB8,1DB9,1DB13,1DB12,1DB11,
HACG01043121	A0A0B7B9J2	gi|524874148|ref|XP_005093814.1|	6	27.2727	6	62	569.177	1DA2,1DA5,1DA6,1DA7,1DA9,1DA10,1DB1,1DB3,1DB5,1DB6,1DB7,1DB8,1DB9,1DB10,1DB13,1DA4,1DA8,1DB12,
HACG01042778	A0A0B7B8J0	gi|524874171|ref|XP_005093825.1|	5	31.1475	5	10	203.74	1DA8,1DB8,1DB9,
HACG01037201	A0A0B7AVN7	gi|524874182|ref|XP_005093830.1|	2	13.986	2	2	47.22	1DB10,
HACG01037202	A0A0B7ASR3	gi|524874182|ref|XP_005093830.1|	5	49.2308	5	10	227.45	1DA10,1DB11,1DB13,
HACG01043538	A0A0B7BBJ2	gi|524874186|ref|XP_005093832.1|	2	9.68661	2	2	37.69	1DB5,
HACG01035200	A0A0B7AQ79	gi|524874190|ref|XP_005093834.1|	2	7.46269	2	2	45.31	1DA5,1DB4,
HACG01035202	A0A0B7AN70	gi|524874194|ref|XP_005093836.1|	14	48.7805	14	29	497.105	1DA6,1DB5,1DB6,1DB7,1DB1,
HACG01043366	A0A0B7BD44	gi|524874352|ref|XP_005093912.1|	2	2.67857	2	2	69.67	1DB3,
HACG01012594	A0A0B6YT90	gi|524874372|ref|XP_005093922.1|	7	18.9112	7	9	205.287	1DA7,1DB7,
HACG01039459	A0A0B7AZ26	gi|524874374|ref|XP_005093923.1|	1	46.281	5	8	117.31	1DB8,
HACG01041065	A0A0B7B784	gi|524874374|ref|XP_005093923.1|	4	49.3213	12	31	353.172	1DA7,1DA8,1DB8,1DB9,
HACG01016638	A0A0B6Z4R6	gi|524874376|ref|XP_005093924.1|	1	63.6364	7	14	218.764	1DA7,1DB8,
HACG01033759	A0A0B7AI08	gi|524874414|ref|XP_005093942.1|	7	13.8148	7	11	253.637	1DA3,1DB3,1DB4,
HACG01034609	A0A0B7AKD5	gi|524874414|ref|XP_005093942.1|	11	25.1309	11	31	542.94	1DA4,1DB1,1DB4,1DB5,1DB3,
HACG01025304	A0A0B6ZU66	gi|524874452|ref|XP_005093961.1|	5	27.4419	5	15	138.243	1DA7,1DB7,1DB8,1DB9,1DA8,
HACG01031196	A0A0B7ADE8	gi|524874572|ref|XP_005094021.1|	4	50.8197	4	9	213.753	1DA12,1DB11,1DB12,
HACG01016096	A0A0B6Z522	gi|524874629|ref|XP_005094049.1|	2	12.3016	2	2	58.94	1DB3,
HACG01016095	A0A0B6Z5K1	gi|524874629|ref|XP_005094049.1|	4	10.8303	4	4	62.98	1DA3,1DB3,
HACG01043460	A0A0B7BDR6	gi|524874655|ref|XP_005094062.1|	14	13.8223	14	53	1274.84	1DA1,1DA2,1DA9,1DB1,1DB2,1DB3,1DB4,
HACG01045821	A0A0B7BK36	gi|524874657|ref|XP_005094063.1|	10	10.8088	10	33	853.069	1DA1,1DA2,1DA3,1DA4,1DB1,1DB2,1DB4,1DA7,1DB8,
HACG01041343	A0A0B7B595	gi|524874769|ref|XP_005094119.1|	10	24.3396	10	15	254.537	1DA4,1DB1,1DB5,1DB6,1DA6,
HACG01041344	A0A0B7B4D0	gi|524874771|ref|XP_005094120.1|	3	14.9105	3	3	100.94	1DA5,
HACG01042984	A0A0B7B942	gi|524874903|ref|XP_005094185.1|	2	5.20833	2	4	56.99	1DB1,1DB2,
HACG01042986	A0A0B7BC33	gi|524874903|ref|XP_005094185.1|	3	3.9932	3	3	66.44	1DB1,1DB2,
HACG01041824	A0A0B7B5R5	gi|524874940|ref|XP_005094202.1|	4	32.0611	4	7	94.7814	1DA11,1DB11,1DB12,
HACG01041249	A0A0B7B449	gi|524874969|ref|XP_005094216.1|	6	7.55814	6	7	136.267	1DA7,1DB3,1DB7,
HACG01006029	A0A0B6Y9Q2	gi|524875029|ref|XP_005094246.1|	6	47.4453	6	18	146.863	1DA8,1DA9,1DB9,1DB10,
HACG01033064	A0A0B7AG06	gi|524875029|ref|XP_005094246.1|	7	57.9618	7	15	298.983	1DA9,1DB10,
HACG01024585	A0A0B6ZUQ5	gi|524875141|ref|XP_005094301.1|	2	15.5172	2	3	69.8767	1DA9,1DB10,
HACG01030385	A0A0B7AB99	gi|524875149|ref|XP_005094305.1|	14	26.8027	14	24	431.11	1DA3,1DA4,1DB4,1DB3,
HACG01027476	A0A0B7A2M2	gi|524875173|ref|XP_005094317.1|	2	6.34058	2	2	50.84	1DB5,
HACG01028046	A0A0B7A4F5	gi|524875207|ref|XP_005094334.1|	2	11.5702	2	3	120.643	1DA8,1DB8,
HACG01034644	A0A0B7AKG4	gi|524875291|ref|XP_005094376.1|	10	16.3611	10	16	297.158	1DA3,1DA4,1DB3,1DB4,
HACG01047071	A0A0B7BNN8	gi|524875325|ref|XP_005094393.1|	3	26.2411	3	8	114.625	1DA11,1DB11,1DB12,
HACG01024676	A0A0B6ZUM9	gi|524875329|ref|XP_005094395.1|	4	44.9438	4	42	769.736	1DA7,1DA8,1DA9,1DA10,1DB1,1DB2,1DB8,1DB9,1DB10,1DB13,
HACG01021799	A0A0B6ZJ66	gi|524875359|ref|XP_005094409.1|	4	50.5882	4	16	191.357	1DA8,1DA10,1DA11,1DA12,1DB11,1DB12,1DB1,
HACG01048480	A0A0B7BT54	gi|524875560|ref|XP_005094506.1|	3	14.2259	3	8	168.84	1DB1,1DB7,1DB8,1DB9,
HACG01038670	A0A0B7AY26	gi|524875599|ref|XP_005094525.1|	4	18.0473	4	10	308.61	1DA6,1DB1,1DB6,1DB5,1DB7,
HACG01031047	A0A0B7AB85	gi|524875601|ref|XP_005094526.1|	14	42.0962	24	34	769.95	1DA4,1DB4,
HACG01044549	A0A0B7BDN2	gi|524875601|ref|XP_005094526.1|	33	71.3793	43	92	1886.38	1DA1,1DA3,1DA4,1DB3,1DB4,1DB5,1DA7,1DB1,1DB2,
HACG01034125	A0A0B7AM63	gi|524875728|ref|XP_005094588.1|	10	46.9466	10	27	259.362	1DA7,1DA8,1DB8,1DB9,
HACG01040716	A0A0B7B5M0	gi|524875757|ref|XP_005094602.1|	2	3.41328	2	2	48.1	1DB3,
HACG01021695	A0A0B6ZLF2	gi|524875771|ref|XP_005094609.1|	12	26.1584	12	30	638.547	1DA3,1DA11,1DB1,1DB2,1DB3,1DB4,
HACG01040839	A0A0B7B2X3	gi|524875985|ref|XP_005094714.1|	12	16.005	12	31	429.777	1DA1,1DA3,1DA4,1DA6,1DB1,1DB2,1DB3,1DB4,
HACG01045737	A0A0B7BI92	gi|524876046|ref|XP_005094743.1|	10	19.1291	10	21	306.348	1DA4,1DB1,1DB3,1DB4,1DB2,
HACG01044164	A0A0B7BCI7	gi|524876098|ref|XP_005094768.1|	10	25.8621	10	20	364.73	1DA4,1DA5,1DB4,1DB5,1DB6,1DA8,
HACG01003961	A0A0B6Y4Q6	gi|524876116|ref|XP_005094777.1|	2	14.9123	2	2	49.42	1DB13,
HACG01016248	A0A0B6Z3I2	gi|524876118|ref|XP_005094778.1|	7	50.4545	7	18	617.086	1DA7,1DB7,1DB8,
HACG01042752	A0A0B7B9N1	gi|524876138|ref|XP_005094788.1|	2	5.12249	2	2	39.93	1DB4,
HACG01042754	A0A0B7B8G5	gi|524876140|ref|XP_005094789.1|	3	14.3836	3	3	61.77	1DB4,
HACG01035014	A0A0B7ALG4	gi|524876286|ref|XP_005094861.1|	4	26.1261	4	8	105.825	1DA3,1DB3,1DB4,
HACG01035016	A0A0B7APF6	gi|524876286|ref|XP_005094861.1|	6	16.9591	6	7	161.53	1DB3,
HACG01024946	A0A0B6ZVG4	gi|524876391|ref|XP_005094913.1|	14	60.6918	14	49	774.809	1DA5,1DA6,1DA7,1DB7,1DA8,1DB1,1DB8,
HACG01045274	A0A0B7BFP9	gi|524876396|ref|XP_005094915.1|	6	35.6098	6	12	208.197	1DA9,1DB9,1DB10,
HACG01012158	A0A0B6YS38	gi|524876470|ref|XP_005094951.1|	5	26.6332	5	10	275.74	1DA7,1DA8,1DB7,1DB8,
HACG01007055	A0A0B6YEK0	gi|524876523|ref|XP_005094977.1|	2	46.5347	4	4	83.61	1DB6,
HACG01027793	A0A0B7A1F8	gi|524876525|ref|XP_005094978.1|	1	32.5203	5	6	88.85	1DB6,
HACG01047730	A0A0B7BR09	gi|524876525|ref|XP_005094978.1|	2	32.3529	4	7	186.507	1DA6,1DB6,
HACG01027792	A0A0B7A1Z9	gi|524876525|ref|XP_005094978.1|	3	15.625	3	3	124.14	1DA6,
HACG01047746	A0A0B7BQG4	gi|524876525|ref|XP_005094978.1|	3	34.9315	10	19	374.321	1DA6,1DB6,1DB7,
HACG01047748	A0A0B7BNS6	gi|524876525|ref|XP_005094978.1|	4	29.927	8	10	130.82	1DB6,1DB7,
HACG01047234	A0A0B7BL93	gi|524876525|ref|XP_005094978.1|	5	57.3529	6	23	400.005	1DA2,1DA3,1DA4,1DA5,1DA6,1DA7,1DA8,1DB6,
HACG01029611	A0A0B7A912	gi|524876525|ref|XP_005094978.1|	6	31.7204	9	16	355.715	1DA1,1DA2,1DA3,1DB2,1DB6,
HACG01047238	A0A0B7BMB5	gi|524876525|ref|XP_005094978.1|	6	37.2973	11	27	569.573	1DA5,1DA6,1DB6,1DB7,
HACG01047734	A0A0B7BMT3	gi|524876525|ref|XP_005094978.1|	6	44.2577	14	31	647.473	1DA5,1DA6,1DB6,1DB7,
HACG01033224	A0A0B7AGF2	gi|524876525|ref|XP_005094978.1|	8	55.205	15	25	531.22	1DA6,1DB6,
HACG01045203	A0A0B7BGH6	gi|524876525|ref|XP_005094978.1|	9	45.1613	15	43	803.229	1DA6,1DB5,1DB6,1DA7,1DB1,1DB4,1DB7,
HACG01033223	A0A0B7AH15	gi|524876525|ref|XP_005094978.1|	9	59.9369	18	44	1035.58	1DA4,1DA5,1DA6,1DB5,1DB6,1DB7,
HACG01048303	A0A0B7BSN3	gi|524876560|ref|XP_005094995.1|	5	9.59651	5	8	201.43	1DB2,1DB4,1DB3,
HACG01036905	A0A0B7AV67	gi|524876601|ref|XP_005095013.1|	3	13.8514	3	3	72.3867	1DB8,
HACG01040482	A0A0B7B2U2	gi|524876605|ref|XP_005095015.1|	12	26.2267	12	21	322.457	1DA4,1DB4,1DB1,1DB3,
HACG01018233	A0A0B6Z999	gi|524876618|ref|XP_005095021.1|	2	8.24742	2	3	50.99	1DB7,
HACG01016332	A0A0B6Z492	gi|524876636|ref|XP_005095029.1|	3	11.7284	3	4	49.89	1DA7,1DB7,
HACG01016518	A0A0B6Z4A9	gi|524876668|ref|XP_005095045.1|	2	12.5954	2	3	78.5933	1DA8,1DB9,
HACG01044773	A0A0B7BF62	gi|524876712|ref|XP_005095067.1|	10	18.4767	10	12	261.34	1DB1,1DB4,1DB3,
HACG01036257	A0A0B7AR99	gi|524876816|ref|XP_005095117.1|	2	5.86011	2	2	74.06	1DB1,
HACG01038416	A0A0B7AYY4	gi|524876864|ref|XP_005095141.1|	3	13.3495	3	11	207.03	1DA4,1DA8,1DA9,1DB4,1DB5,1DB6,1DB10,
HACG01029968	A0A0B7A7R6	gi|524876974|ref|XP_005095195.1|	8	32.1149	8	10	201.85	1DA5,1DB5,1DB6,
HACG01038375	A0A0B7AZC4	gi|524876984|ref|XP_005095200.1|	8	19.322	8	8	161.25	1DB4,
HACG01038305	A0A0B7AVX2	gi|524876998|ref|XP_005095207.1|	2	3.67133	2	2	37.24	1DA4,1DB4,
HACG01005526	A0A0B6Y989	gi|524877031|ref|XP_005095223.1|	8	34.9673	8	18	329.551	1DA6,1DB3,1DB6,1DB7,
HACG01002364	A0A0B6XZ93	gi|524877040|ref|XP_005095227.1|	7	42.8571	7	18	508.413	1DA7,1DA8,1DB8,1DB9,1DB10,
HACG01042344	A0A0B7B787	gi|524877054|ref|XP_005095234.1|	7	22.1818	7	8	182.99	1DA8,1DB8,
HACG01046759	A0A0B7BJU2	gi|524877098|ref|XP_005095256.1|	3	31.9797	5	21	197.464	1DB1,1DB9,1DB8,1DB2,1DB7,
HACG01016532	A0A0B6Z4V5	gi|524877129|ref|XP_005095271.1|	5	32.2368	5	20	367.54	1DA8,1DA9,1DA10,1DA11,1DB1,1DB9,1DB10,1DB13,1DB8,
HACG01022814	A0A0B6ZM06	gi|524877261|ref|XP_005095336.1|	4	15.2582	6	13	203.096	1DB3,1DB5,1DB6,1DB4,
HACG01034913	A0A0B7ALN4	gi|524877265|ref|XP_005095338.1|	6	26.2774	9	14	321.466	1DA5,1DB5,1DB6,
HACG01017516	A0A0B6Z8V8	gi|524877372|ref|XP_005095389.1|	2	30.303	2	3	47.96	1DA12,1DB12,
HACG01025299	A0A0B6ZU63	gi|524877582|ref|XP_005095490.1|	3	10.4478	3	4	77.9	1DB7,1DB8,
HACG01032668	A0A0B7AFJ9	gi|524877602|ref|XP_005095500.1|	4	16.3599	7	9	119.827	1DB4,1DB5,
HACG01032667	A0A0B7AFY0	gi|524877614|ref|XP_005095506.1|	2	8.14196	4	7	128.699	1DA4,1DB5,1DB4,
HACG01036555	A0A0B7AU70	gi|524877675|ref|XP_005095535.1|	2	3.43511	2	2	69.69	1DB3,
HACG01029717	A0A0B7A7F1	gi|524877675|ref|XP_005095535.1|	16	25.9169	16	48	1144.83	1DA1,1DA2,1DA3,1DA4,1DB1,1DB2,1DB3,1DB4,1DA7,1DA8,1DB8,
HACG01002550	A0A0B6Y1M3	gi|524877793|ref|XP_005095594.1|	2	14.3885	2	3	49.98	1DB10,1DB13,
HACG01023526	A0A0B6ZRE6	gi|524877795|ref|XP_005095595.1|	9	28.2276	9	20	564.19	1DA4,1DB1,1DB2,1DB3,1DB4,1DB5,
HACG01023418	A0A0B6ZNZ3	gi|524877803|ref|XP_005095598.1|	2	8.43882	2	2	32.94	1DB8,
HACG01030604	A0A0B7A916	gi|524877849|ref|XP_005095621.1|	4	16.2362	4	4	60.81	1DB8,
HACG01042741	A0A0B7BBE1	gi|524877853|ref|XP_005095623.1|	1	12.7962	2	4	85.8	1DA6,1DB6,
HACG01020827	A0A0B6ZH02	gi|524877853|ref|XP_005095623.1|	3	40.5063	6	17	283.296	1DA5,1DA6,1DB5,1DB6,1DA7,1DB7,
HACG01042742	A0A0B7B9M1	gi|524877853|ref|XP_005095623.1|	5	29.0323	9	20	410.08	1DA5,1DA6,1DB6,1DB7,
HACG01035624	A0A0B7API1	gi|524877903|ref|XP_005095647.1|	7	5.71211	7	8	60.66	1DA2,1DB1,1DB2,
HACG01035630	A0A0B7ARG1	gi|524877903|ref|XP_005095647.1|	15	8.41764	15	31	706.647	1DA1,1DA2,1DB1,1DB2,
HACG01031801	A0A0B7AF38	gi|524878037|ref|XP_005095711.1|	6	40.5128	6	7	188.309	1DA8,1DB9,
HACG01043022	A0A0B7BAG5	gi|524878114|ref|XP_005095748.1|	6	29.8578	6	9	109.279	1DA7,1DA8,1DB7,1DB8,
HACG01029099	A0A0B7A4W0	gi|524878165|ref|XP_005095772.1|	9	26.7677	9	12	221.82	1DA5,1DB5,1DB6,
HACG01045107	A0A0B7BGI9	gi|524878167|ref|XP_005095773.1|	9	15.767	9	19	277.743	1DA4,1DB4,1DB1,1DB2,1DB3,
HACG01029877	A0A0B7A7U9	gi|524878217|ref|XP_005095797.1|	3	14.1844	3	6	113.93	1DB1,1DB4,1DB5,
HACG01029876	A0A0B7A9Q9	gi|524878217|ref|XP_005095797.1|	5	22.7979	5	5	96.27	1DB5,
HACG01029875	A0A0B7A9S1	gi|524878219|ref|XP_005095798.1|	2	18.6528	2	3	65.03	1DA4,1DB4,
HACG01048335	A0A0B7BSQ6	gi|524878247|ref|XP_005095812.1|	6	11.8087	6	6	127.62	1DB5,1DB8,
HACG01036311	A0A0B7AT65	gi|524878295|ref|XP_005095836.1|	2	2.6949	2	5	169.16	1DB1,1DB2,1DB3,
HACG01031649	A0A0B7AF37	gi|524878368|ref|XP_005095871.1|	2	7.62943	2	2	49.2	1DA6,1DB6,
HACG01023257	A0A0B6ZP10	gi|524878382|ref|XP_005095878.1|	4	31.0345	4	5	93.32	1DA9,1DB9,1DB10,
HACG01044845	A0A0B7BHQ6	gi|524878388|ref|XP_005095881.1|	13	31.7739	13	27	460.896	1DA4,1DA5,1DB1,1DB4,1DB5,
HACG01011541	A0A0B6YRL4	gi|524878410|ref|XP_005095892.1|	2	4.56349	2	2	36.69	1DB2,
HACG01042639	A0A0B7B862	gi|524878451|ref|XP_005095912.1|	11	16.3812	11	16	358.975	1DA3,1DB3,
HACG01018605	A0A0B6ZCP0	gi|524878458|ref|XP_005095915.1|	10	62.7907	10	43	907.431	1DA9,1DA10,1DB10,1DB11,1DB12,1DB13,
HACG01036579	A0A0B7AU04	gi|524878504|ref|XP_005095936.1|	3	85.1852	6	6	153.22	1DB9,
HACG01018453	A0A0B6Z9W6	gi|524878504|ref|XP_005095936.1|	14	84.3902	16	45	751.352	1DA7,1DA8,1DA9,1DB8,1DB9,1DB10,
HACG01035044	A0A0B7ALJ6	gi|524878596|ref|XP_005095981.1|	6	11.3548	6	8	165.38	1DB1,1DB3,
HACG01011178	A0A0B6YP75	gi|524878598|ref|XP_005095982.1|	3	17.4603	3	5	93.56	1DA9,1DB10,1DB13,
HACG01034071	A0A0B7ALW2	gi|524878653|ref|XP_005096009.1|	3	37.2881	3	11	188.145	1DA1,1DA2,1DB2,1DA3,
HACG01015979	A0A0B6Z2N3	gi|524878669|ref|XP_005096017.1|	4	19.8444	4	4	60.67	1DA7,1DA8,1DB8,
HACG01028726	A0A0B7A6D8	gi|524878669|ref|XP_005096017.1|	7	40.3922	7	7	146.896	1DB8,
HACG01047891	A0A0B7BQW4	gi|524878707|ref|XP_005096036.1|	2	18.2692	3	3	71.6367	1DB5,
HACG01047892	A0A0B7BPD6	gi|524878707|ref|XP_005096036.1|	3	9.35412	4	4	47.01	1DA5,1DB5,
HACG01019388	A0A0B6ZCK1	gi|524878727|ref|XP_005096045.1|	2	7.88043	2	2	64.96	1DB1,1DB5,
HACG01025146	A0A0B6ZW18	gi|524878727|ref|XP_005096045.1|	2	7.73481	2	4	136.1	1DB5,1DB6,
HACG01042666	A0A0B7B893	gi|524878910|ref|XP_005096136.1|	5	20.7237	5	8	214.05	1DA4,1DB4,1DA5,1DB5,
HACG01017084	A0A0B6Z5R7	gi|524878917|ref|XP_005096139.1|	2	10.7914	2	9	222.271	1DA1,1DA2,1DB1,1DB2,
HACG01023895	A0A0B6ZSN3	gi|524878973|ref|XP_005096166.1|	18	67.7419	18	94	2171.89	1DA4,1DA7,1DA8,1DA11,1DA12,1DB1,1DB7,1DB8,1DA5,1DA6,1DB6,1DA9,1DB2,1DB4,1DB5,
HACG01025183	A0A0B6ZU16	gi|524878983|ref|XP_005096171.1|	3	32.2222	8	10	95.99	1DB7,
HACG01025182	A0A0B6ZUL9	gi|524878983|ref|XP_005096171.1|	7	39.9254	10	15	117.117	1DB1,1DB6,1DB7,
HACG01032549	A0A0B7AEJ4	gi|524879065|ref|XP_005096212.1|	6	17.7243	6	8	172.85	1DA4,1DB4,
HACG01033889	A0A0B7AIE0	gi|524879077|ref|XP_005096218.1|	4	18.797	4	4	72.18	1DA7,1DB7,
HACG01024987	A0A0B6ZU25	gi|524879087|ref|XP_005096223.1|	2	7.01107	2	2	21.7	1DB7,
HACG01011076	A0A0B6YQC9	gi|524879183|ref|XP_005096269.1|	4	36.5079	4	6	201.903	1DB11,1DB12,
HACG01049561	A0A0B7BVN5	gi|524879191|ref|XP_005096273.1|	5	15	5	5	90.98	1DB4,
HACG01027045	A0A0B7A1U8	gi|524879223|ref|XP_005096289.1|	7	31.7406	7	26	428.17	1DA5,1DA7,1DB7,1DB8,
HACG01046274	A0A0B7BIG6	gi|524879345|ref|XP_005096349.1|	5	19.6429	5	7	170.666	1DA7,1DB7,
HACG01022150	A0A0B6ZMU1	gi|524879355|ref|XP_005096354.1|	2	15.3846	2	2	38.16	1DB4,
HACG01012371	A0A0B6YTW9	gi|524879388|ref|XP_005096370.1|	14	50.1577	14	21	434.981	1DA6,1DB7,
HACG01038992	A0A0B7AZ07	gi|524879388|ref|XP_005096370.1|	16	55.5205	16	56	1569.7	1DA6,1DA7,1DB7,1DB8,1DB9,1DB6,
HACG01026781	A0A0B7A0J7	gi|524879487|ref|XP_005096418.1|	3	21.3018	3	4	52.57	1DA10,1DB13,
HACG01031115	A0A0B7ADH2	gi|524879541|ref|XP_005096445.1|	7	24.0786	7	10	184.24	1DA5,1DB5,
HACG01011745	A0A0B6YS56	gi|524879594|ref|XP_005096471.1|	12	53.0405	12	28	727.889	1DA7,1DB7,
HACG01035886	A0A0B7APG1	gi|524879616|ref|XP_005096482.1|	14	62.7306	14	35	883.474	1DA7,1DB7,1DB8,
HACG01043897	A0A0B7BCZ5	gi|524879751|ref|XP_005096547.1|	2	3.78096	2	3	76.8367	1DB3,1DB4,
HACG01035108	A0A0B7AMF3	gi|524879769|ref|XP_005096556.1|	4	38.4615	4	8	163.56	1DA11,1DB11,1DB12,1DB13,
HACG01043417	A0A0B7BBL5	gi|524879771|ref|XP_005096557.1|	1	10.2138	3	4	107.39	1DB1,1DB3,
HACG01043423	A0A0B7BB68	gi|524879771|ref|XP_005096557.1|	3	29.918	10	11	252.945	1DB4,
HACG01043422	A0A0B7BBM0	gi|524879771|ref|XP_005096557.1|	6	24.679	13	20	425.82	1DB3,1DB4,
HACG01025058	A0A0B6ZTP0	gi|524879801|ref|XP_005096572.1|	9	33.6478	9	16	456.118	1DA5,1DA6,1DB6,1DB7,
HACG01019512	A0A0B6ZD40	gi|524879821|ref|XP_005096582.1|	2	9.2827	2	3	51.5767	1DB8,
HACG01012222	A0A0B6YSI6	gi|524879821|ref|XP_005096582.1|	6	22.1311	6	9	230.367	1DA7,1DB7,1DB8,
HACG01036741	A0A0B7AUB6	gi|524879910|ref|XP_005096625.1|	8	21.8855	8	11	190.807	1DA6,1DA7,1DB7,
HACG01011891	A0A0B6YSI7	gi|524879933|ref|XP_005096636.1|	8	40.1826	8	14	227.491	1DA8,1DB8,1DB9,
HACG01036866	A0A0B7AUN6	gi|524879943|ref|XP_005096641.1|	3	23.913	3	3	52.1467	1DB10,1DB12,
HACG01045293	A0A0B7BGQ8	gi|524879957|ref|XP_005096647.1|	3	18.8356	3	6	259.33	1DA7,1DB7,
HACG01020405	A0A0B6ZHN8	gi|524880064|ref|XP_005096700.1|	17	47.2458	17	30	619.72	1DA5,1DB5,1DB1,
HACG01004414	A0A0B6Y546	gi|524880074|ref|XP_005096705.1|	2	17.1642	2	11	170.65	1DA9,1DA10,1DB13,
HACG01018220	A0A0B6ZBH2	gi|524880074|ref|XP_005096705.1|	3	22.3881	3	3	35.4933	1DB10,
HACG01006388	A0A0B6YAV9	gi|524880082|ref|XP_005096709.1|	5	27.7551	5	10	113.89	1DA9,1DB9,1DB10,
HACG01047781	A0A0B7BQJ6	gi|524880248|ref|XP_005096790.1|	7	38.0282	7	16	105.257	1DA8,1DA9,1DB9,1DB10,
HACG01012153	A0A0B6YS36	gi|524880339|ref|XP_005096834.1|	12	44.7471	12	24	333.047	1DA7,1DA8,1DB8,1DB7,
HACG01038979	A0A0B7AXW9	gi|524880507|ref|XP_005096916.1|	4	33.7278	4	8	111.845	1DA9,1DB10,
HACG01048410	A0A0B7BSX4	gi|524880507|ref|XP_005096916.1|	9	59.7633	9	23	403.307	1DA8,1DA10,1DB10,1DB13,1DA9,1DB11,
HACG01017391	A0A0B6Z8H7	gi|524880525|ref|XP_005096925.1|	2	6.28141	2	3	45.2167	1DB4,
HACG01024074	A0A0B6ZQR0	gi|524880570|ref|XP_005096947.1|	3	29.8246	3	4	61.82	1DB11,1DB12,
HACG01041649	A0A0B7B593	gi|524880608|ref|XP_005096966.1|	1	21.6783	2	3	115.187	1DB4,
HACG01041647	A0A0B7B6L5	gi|524880608|ref|XP_005096966.1|	3	13.3803	4	7	232.344	1DA4,1DB4,
HACG01041650	A0A0B7B8X1	gi|524880608|ref|XP_005096966.1|	4	10.5618	5	5	186.19	1DB4,
HACG01022646	A0A0B6ZNV9	gi|524880698|ref|XP_005097010.1|	2	5.47945	2	2	55.43	1DB4,
HACG01039118	A0A0B7AZ06	gi|524880725|ref|XP_005097023.1|	7	30.855	7	16	191.205	1DA7,1DA8,1DB8,1DB9,
HACG01041348	A0A0B7B4D4	gi|524880769|ref|XP_005097043.1|	3	14.9091	3	5	111.99	1DB7,
HACG01001718	A0A0B6XXJ6	gi|524880783|ref|XP_005097050.1|	3	20	3	3	46.92	1DB10,
HACG01034172	A0A0B7AKB2	gi|524880806|ref|XP_005097061.1|	2	6.71642	2	5	88.42	1DA6,1DB6,
HACG01019667	A0A0B6ZDM9	gi|524880840|ref|XP_005097078.1|	14	51.5075	14	24	380.958	1DA5,1DA6,1DB6,
HACG01002563	A0A0B6XZZ4	gi|524880862|ref|XP_005097089.1|	2	11.6505	2	3	49.6467	1DB11,1DB12,
HACG01033252	A0A0B7AHL7	gi|524880906|ref|XP_005097111.1|	8	32.3529	8	9	123.296	1DB8,
HACG01022985	A0A0B6ZQ36	gi|524880971|ref|XP_005097142.1|	2	6.94789	2	2	24.1	1DB6,
HACG01043059	A0A0B7B9D3	gi|524880980|ref|XP_005097146.1|	2	6.16622	2	3	58.66	1DA6,1DB7,
HACG01028734	A0A0B7A3S8	gi|524880992|ref|XP_005097152.1|	3	7.85908	3	3	43.72	1DB8,
HACG01031460	A0A0B7AEE2	gi|524881016|ref|XP_005097164.1|	9	10.7216	9	12	293.373	1DA3,1DB2,1DB3,1DB1,
HACG01042711	A0A0B7BBB3	gi|524881047|ref|XP_005097179.1|	8	45.6731	8	17	236.448	1DA8,1DB9,
HACG01030131	A0A0B7AAG8	gi|524881119|ref|XP_005097215.1|	28	55.938	28	90	1496.11	1DA1,1DA2,1DA3,1DA4,1DB1,1DB3,1DB4,1DB8,1DA7,1DA8,1DB2,
HACG01016720	A0A0B6Z799	gi|524881344|ref|XP_005097324.1|	6	23.2558	6	9	178.472	1DA8,1DB8,
HACG01033165	A0A0B7AJE5	gi|524881358|ref|XP_005097331.1|	2	23.622	2	3	46.4733	1DA11,1DB11,
HACG01002482	A0A0B6XZ62	gi|524881385|ref|XP_005097344.1|	4	30	4	5	71.56	1DB11,1DB13,
HACG01022341	A0A0B6ZMU8	gi|524881407|ref|XP_005097355.1|	1	9.375	2	2	101.29	1DA7,
HACG01049886	A0A0B7BWJ5	gi|524881413|ref|XP_005097358.1|	2	16.8182	3	7	203.824	1DA7,1DA8,1DB8,1DB9,
HACG01023486	A0A0B6ZRA1	gi|524881413|ref|XP_005097358.1|	7	31.1927	8	14	92.5571	1DB8,1DB9,
HACG01023762	A0A0B6ZQF6	gi|524881417|ref|XP_005097360.1|	12	53.0864	12	38	776.828	1DA3,1DA4,1DA5,1DA6,1DA7,1DA10,1DB1,1DB5,1DB6,1DB7,
HACG01033340	A0A0B7AJV3	gi|524881469|ref|XP_005097386.1|	5	18.018	5	8	172.75	1DA6,1DB7,
HACG01012480	A0A0B6YV45	gi|524881473|ref|XP_005097388.1|	1	23.301	2	3	92.9533	1DB11,1DB12,
HACG01006386	A0A0B6YBQ1	gi|524881473|ref|XP_005097388.1|	3	31.6832	4	7	152.816	1DB11,1DB12,
HACG01019644	A0A0B6ZD62	gi|524881487|ref|XP_005097395.1|	2	7.11974	2	2	52.21	1DB5,
HACG01042238	A0A0B7B7W6	gi|524881555|ref|XP_005097428.1|	3	24.8031	5	16	556.768	1DB1,1DB2,1DB7,1DB8,
HACG01042237	A0A0B7B865	gi|524881557|ref|XP_005097429.1|	4	60.6299	11	37	830.936	1DA8,1DB9,1DB8,
HACG01042234	A0A0B7B6Z4	gi|524881557|ref|XP_005097429.1|	5	56.2992	11	57	1482.21	1DA4,1DA6,1DA7,1DA8,1DB1,1DB3,1DB4,1DB7,1DB9,1DB10,1DA5,1DA9,1DA12,
HACG01034456	A0A0B7AMU8	gi|524881587|ref|XP_005097444.1|	2	3.66667	2	5	68.93	1DA8,1DB9,
HACG01044082	A0A0B7BDM3	gi|524881606|ref|XP_005097453.1|	13	50.5952	13	33	739.807	1DA3,1DA4,1DA5,1DA6,1DA7,1DA9,1DB1,1DB6,1DB7,
HACG01041623	A0A0B7B664	gi|524881651|ref|XP_005097475.1|	6	18.6837	6	6	173.37	1DB5,
HACG01037631	A0A0B7AWT8	gi|524881729|ref|XP_005097514.1|	22	51.4545	22	37	804.237	1DA5,1DB5,1DB4,
HACG01020102	A0A0B6ZEZ5	gi|524881743|ref|XP_005097521.1|	7	32.0261	7	34	671.207	1DA10,1DA11,1DB11,1DB12,1DB13,
HACG01040930	A0A0B7B6P4	gi|524881765|ref|XP_005097532.1|	3	17.3913	3	4	74.98	1DB1,1DB2,
HACG01037683	A0A0B7AUP0	gi|524881775|ref|XP_005097537.1|	3	7.44275	3	3	74.2933	1DB4,1DB5,
HACG01005597	A0A0B6Y818	gi|524881799|ref|XP_005097549.1|	4	24.8062	4	6	62.28	1DB11,1DB13,
HACG01049795	A0A0B7BWV2	gi|524881805|ref|XP_005097552.1|	2	12.1693	2	5	69.19	1DB9,1DB10,
HACG01002127	A0A0B6XY67	gi|524881809|ref|XP_005097554.1|	8	46.875	8	14	198.32	1DB9,1DB10,
HACG01030319	A0A0B7A872	gi|524881811|ref|XP_005097555.1|	23	73.3533	23	178	4156.66	1DA1,1DA2,1DA3,1DA4,1DA5,1DA6,1DB1,1DB2,1DB3,1DB4,1DB5,1DB6,1DB7,1DA9,1DA11,1DB12,
HACG01038485	A0A0B7AZQ2	gi|524881817|ref|XP_005097558.1|	1	20.0988	9	11	207.762	1DB3,
HACG01038479	A0A0B7AWH4	gi|524881819|ref|XP_005097559.1|	1	19.9013	9	11	207.951	1DB3,
HACG01014844	A0A0B6YZD6	gi|524881845|ref|XP_005097572.1|	2	18.018	2	2	77.62	1DB10,
HACG01029786	A0A0B7A9H6	gi|524881865|ref|XP_005097581.1|	6	16.2218	6	7	158.417	1DA4,1DB4,
HACG01039398	A0A0B7AZP8	gi|524881948|ref|XP_005097620.1|	4	5.76471	4	8	135.24	1DB3,1DB5,1DB8,1DB9,
HACG01031183	A0A0B7ABC6	gi|524881948|ref|XP_005097620.1|	6	7.50636	6	18	549.957	1DA5,1DA6,1DA7,1DA8,1DB6,1DB7,1DB8,1DB9,1DB3,1DB4,
HACG01005445	A0A0B6YA28	gi|524881980|ref|XP_005097636.1|	12	40.4984	12	14	284.99	1DB1,1DB2,1DB7,
HACG01026907	A0A0B6ZZK4	gi|524881984|ref|XP_005097638.1|	6	44.2857	6	9	211.28	1DB11,1DB13,1DB12,
HACG01048432	A0A0B7BQZ8	gi|524881984|ref|XP_005097638.1|	10	75	10	83	2208.88	1DA10,1DA11,1DA12,1DB10,1DB11,1DB12,1DB13,
HACG01019800	A0A0B6ZG05	gi|524882007|ref|XP_005097649.1|	4	14.6341	4	4	82.35	1DB8,
HACG01044028	A0A0B7BF13	gi|524882014|ref|XP_005097652.1|	2	6.58824	2	2	41.19	1DA6,1DB6,
HACG01034072	A0A0B7AK55	gi|524882112|ref|XP_005097701.1|	1	69.3023	13	39	716.43	1DA1,1DA2,1DB2,1DA3,1DA4,
HACG01005056	A0A0B6Y7X9	gi|524882112|ref|XP_005097701.1|	5	34.9315	5	11	101.891	1DB7,1DB8,1DB9,
HACG01023070	A0A0B6ZQF9	gi|524882120|ref|XP_005097705.1|	8	26.7477	8	22	349.119	1DA1,1DA2,1DB7,1DB1,1DB6,1DB2,1DB5,
HACG01040177	A0A0B7B2E9	gi|524882193|ref|XP_005097741.1|	3	28.3582	3	8	180.215	1DA10,1DB11,1DB13,
HACG01032963	A0A0B7AGB1	gi|524882215|ref|XP_005097752.1|	6	56.25	6	13	210.986	1DA12,1DB11,1DB12,
HACG01005685	A0A0B6YAR0	gi|524882249|ref|XP_005097769.1|	2	10.3093	2	2	50.51	1DB9,
HACG01025856	A0A0B6ZXY6	gi|524882279|ref|XP_005097784.1|	1	4.93421	2	2	38.6	1DB7,
HACG01025715	A0A0B6ZXV2	gi|524882305|ref|XP_005097797.1|	9	59.4872	9	86	1954.99	1DA4,1DA5,1DA6,1DA7,1DA8,1DA9,1DA10,1DA11,1DB1,1DB4,1DB7,1DB8,1DB9,1DB10,1DB12,1DB13,
HACG01001699	A0A0B6XXD3	gi|524882332|ref|XP_005097810.1|	6	26.6355	6	11	134.844	1DA7,1DA8,1DB1,1DB8,1DB7,
HACG01037642	A0A0B7AV73	gi|524882402|ref|XP_005097845.1|	4	8.15138	4	4	92.25	1DB4,
HACG01038086	A0A0B7AY46	gi|524882414|ref|XP_005097851.1|	9	45	10	15	105.103	1DA7,1DA9,1DB9,
HACG01036522	A0A0B7AS20	gi|524882420|ref|XP_005097854.1|	7	62.963	9	29	343.038	1DA4,1DB4,1DB1,1DB3,1DB5,1DA5,
HACG01002179	A0A0B6XYR0	gi|524882420|ref|XP_005097854.1|	10	28.64	14	21	382.252	1DA4,1DB4,
HACG01036521	A0A0B7ATQ9	gi|524882422|ref|XP_005097855.1|	3	72.043	6	12	145.743	1DB1,1DB4,1DB3,
HACG01036520	A0A0B7AU14	gi|524882422|ref|XP_005097855.1|	13	52.7439	13	66	1479.91	1DA2,1DA3,1DA4,1DA5,1DA6,1DB1,1DB4,1DA7,1DA8,1DA9,1DB3,1DB5,
HACG01038707	A0A0B7AXQ6	gi|524882436|ref|XP_005097862.1|	13	30.4688	13	26	393.942	1DA4,1DB5,1DA5,1DB4,1DB1,
HACG01023737	A0A0B6ZQD9	gi|524882460|ref|XP_005097873.1|	5	47.4026	5	26	436.891	1DA11,1DB13,1DB11,1DB12,1DB1,
HACG01042971	A0A0B7BC18	gi|524882460|ref|XP_005097873.1|	6	54.3624	6	67	1357.22	1DA7,1DB1,1DB7,1DB8,1DB10,1DB11,1DB12,1DB13,1DA8,1DA11,1DB2,1DB9,1DA9,1DA10,1DA12,
HACG01038340	A0A0B7AZ95	gi|524882484|ref|XP_005097885.1|	5	22.1024	6	11	238.171	1DA7,1DB7,
HACG01031944	A0A0B7ACQ9	gi|524882484|ref|XP_005097885.1|	11	38.3784	12	28	657.247	1DA6,1DA7,1DB7,
HACG01005270	A0A0B6Y9K6	gi|524882640|ref|XP_005097961.1|	2	3.98126	2	2	42.61	1DB5,
HACG01027746	A0A0B7A3G6	gi|524882665|ref|XP_005097972.1|	2	13.1818	2	2	39.68	1DB8,
HACG01005798	A0A0B6Y955	gi|524882717|ref|XP_005097997.1|	10	38.0682	10	31	635.541	1DA1,1DA2,1DA4,1DA7,1DA8,1DB1,1DB7,1DB8,1DB5,1DB6,
HACG01045497	A0A0B7BHK2	gi|524882721|ref|XP_005097999.1|	2	11.276	2	3	170.437	1DA7,1DB7,
HACG01042632	A0A0B7B9D2	gi|524882733|ref|XP_005098005.1|	2	22.5	2	4	90.09	1DA10,1DB10,1DB13,
HACG01026178	A0A0B6ZWS4	gi|524882748|ref|XP_005098012.1|	16	62.1914	37	152	3098.04	1DA2,1DA3,1DA4,1DA8,1DB4,1DB5,1DA11,
HACG01030332	A0A0B7A937	gi|524882748|ref|XP_005098012.1|	20	69.8925	39	196	3973.08	1DA1,1DA3,1DA4,1DA5,1DB4,1DA6,1DB1,1DB2,1DB3,
HACG01038071	A0A0B7AY37	gi|524882750|ref|XP_005098013.1|	2	4.9569	2	2	45.59	1DB5,
HACG01012283	A0A0B6YSE3	gi|524882774|ref|XP_005098023.1|	9	33.0827	9	15	386.86	1DA6,1DB6,1DB7,
HACG01040317	A0A0B7B2T8	gi|524882784|ref|XP_005098028.1|	2	11.0687	2	5	151.14	1DA3,1DA4,1DB2,1DB3,
HACG01040318	A0A0B7B297	gi|524882784|ref|XP_005098028.1|	3	12.3839	3	3	109.403	1DB4,
HACG01023249	A0A0B6ZN89	gi|524882812|ref|XP_005098042.1|	2	7.73639	2	2	65.88	1DB5,
HACG01043370	A0A0B7BDH8	gi|524882922|ref|XP_005098097.1|	3	11.838	3	3	115.34	1DA6,
HACG01046422	A0A0B7BK55	gi|524882956|ref|XP_005098113.1|	2	7.26744	2	2	73.26	1DB4,
HACG01046424	A0A0B7BIV7	gi|524882956|ref|XP_005098113.1|	7	19.6911	7	11	234.732	1DB1,1DB5,
HACG01042664	A0A0B7B882	gi|524882968|ref|XP_005098119.1|	2	14.6667	2	2	54.66	1DB4,
HACG01042659	A0A0B7B879	gi|524882968|ref|XP_005098119.1|	12	30.5835	12	18	417.259	1DA3,1DA4,1DB4,
HACG01044138	A0A0B7BDG7	gi|524883074|ref|XP_005098171.1|	2	4.05616	2	2	39.68	1DB3,
HACG01012751	A0A0B6YUZ6	gi|524883088|ref|XP_005098178.1|	3	36.5759	9	15	203.603	1DA6,1DB7,1DB6,
HACG01042381	A0A0B7BAA5	gi|524883090|ref|XP_005098179.1|	2	27.8884	8	12	154.83	1DA7,1DB7,
HACG01025744	A0A0B6ZVG3	gi|524883119|ref|XP_005098193.1|	5	10.2564	5	5	52.58	1DB6,
HACG01004390	A0A0B6Y6Y4	gi|524883129|ref|XP_005098198.1|	6	37.5	6	37	547.538	1DA7,1DA8,1DA9,1DA10,1DB10,1DB13,
HACG01025828	A0A0B6ZVR8	gi|524883140|ref|XP_005098203.1|	9	23.9686	9	14	287.707	1DA3,1DA4,1DB1,1DB3,
HACG01025829	A0A0B6ZVP3	gi|524883140|ref|XP_005098203.1|	14	31.388	14	17	408.456	1DB4,
HACG01029475	A0A0B7A8M8	gi|524883288|ref|XP_005098277.1|	22	49.2487	22	60	1106.61	1DA3,1DA4,1DB4,1DB5,1DA7,1DB1,1DB3,1DA12,1DA5,
HACG01049465	A0A0B7BVZ9	gi|524883388|ref|XP_005098325.1|	3	19.7115	3	12	214.173	1DA2,1DA3,1DA4,1DB4,1DB5,1DB2,
HACG01045772	A0A0B7BIC9	gi|524883534|ref|XP_005098394.1|	3	36.6667	3	5	56.36	1DA10,1DB13,
HACG01047578	A0A0B7BQ40	gi|524883534|ref|XP_005098394.1|	8	59.4406	8	37	536.764	1DA8,1DA9,1DA11,1DA12,1DB8,1DB11,1DB12,1DB13,
HACG01046100	A0A0B7BLJ8	gi|524883534|ref|XP_005098394.1|	10	57.0423	10	31	475.582	1DA9,1DA11,1DB11,1DB12,1DB13,
HACG01037246	A0A0B7AVR7	gi|524883540|ref|XP_005098397.1|	6	35.1485	6	17	325.711	1DA8,1DA9,1DB8,1DB9,1DB10,
HACG01046817	A0A0B7BLA5	gi|524883548|ref|XP_005098401.1|	7	32.7206	7	18	404.92	1DA7,1DB7,1DB8,1DB13,
HACG01034546	A0A0B7AN45	gi|524883558|ref|XP_005098406.1|	5	12.4153	5	9	228.703	1DA4,1DA5,1DA6,1DB6,
HACG01019868	A0A0B6ZDV3	gi|524883562|ref|XP_005098408.1|	4	15.1515	4	5	143.7	1DB10,1DB13,
HACG01028172	A0A0B7A351	gi|524883622|ref|XP_005098438.1|	3	6.31365	3	3	79.58	1DB5,
HACG01030702	A0A0B7AA82	gi|524883626|ref|XP_005098440.1|	8	65.2482	8	52	1123.01	1DA7,1DA8,1DA9,1DA10,1DA11,1DB1,1DB11,1DB12,1DB13,1DB10,
HACG01021850	A0A0B6ZLU3	gi|524883640|ref|XP_005098447.1|	4	17.7258	4	11	166.635	1DA5,1DA7,1DB7,1DA6,
HACG01029780	A0A0B7A9I9	gi|524883672|ref|XP_005098463.1|	2	5.26316	2	3	78.0667	1DA8,1DB9,
HACG01032566	A0A0B7AHD2	gi|524883711|ref|XP_005098482.1|	3	16.5138	3	5	156.18	1DA8,1DB8,
HACG01035150	A0A0B7AQ40	gi|524883721|ref|XP_005098487.1|	7	26.6871	7	11	127.869	1DA6,1DB7,1DB6,
HACG01020263	A0A0B6ZF17	gi|524883762|ref|XP_005098507.1|	6	25.8621	6	8	131.255	1DA4,1DB4,1DB5,
HACG01020264	A0A0B6ZEU0	gi|524883762|ref|XP_005098507.1|	14	55.3265	14	39	795.853	1DA3,1DA4,1DB3,1DB4,1DB5,1DB1,
HACG01034677	A0A0B7ALR6	gi|524883770|ref|XP_005098511.1|	2	3.76623	2	2	95.13	1DB3,
HACG01025386	A0A0B6ZWL8	gi|524883774|ref|XP_005098513.1|	1	5.8104	2	2	25.96	1DB4,
HACG01030581	A0A0B7ABU6	gi|524883861|ref|XP_005098556.1|	2	33.8843	5	5	46.26	1DB13,
HACG01002313	A0A0B6XZ83	gi|524883861|ref|XP_005098556.1|	3	33.8843	5	8	88.08	1DA10,1DB10,1DB13,
HACG01002955	A0A0B6Y2R9	gi|524883909|ref|XP_005098580.1|	2	21.3235	2	5	43.59	1DA10,1DB8,1DB13,
HACG01032133	A0A0B7AE29	gi|524883986|ref|XP_005098618.1|	3	16.25	3	3	61.3233	1DB5,
HACG01018638	A0A0B6ZA92	gi|524883990|ref|XP_005098620.1|	15	66.8675	15	88	2385.29	1DA1,1DA2,1DA3,1DA4,1DA5,1DA6,1DB1,1DB4,1DB6,1DB7,1DB3,1DA7,1DA11,1DB2,1DB5,1DB8,
HACG01039765	A0A0B7B3D6	gi|524884059|ref|XP_005098653.1|	2	6.34058	2	5	167.99	1DB1,1DB2,1DB3,1DB4,
HACG01047605	A0A0B7BQR5	gi|524884059|ref|XP_005098653.1|	5	19.1781	5	14	465.337	1DA3,1DA4,1DB1,1DB4,1DB5,1DB2,
HACG01048981	A0A0B7BRJ7	gi|524884087|ref|XP_005098667.1|	4	8.26613	4	6	82.64	1DA5,1DB5,1DB6,
HACG01027037	A0A0B7A006	gi|524884097|ref|XP_005098672.1|	3	8.87097	3	4	155.24	1DB3,
HACG01038560	A0A0B7AWR8	gi|524884099|ref|XP_005098673.1|	2	13.0612	2	2	64.82	1DB3,
HACG01019518	A0A0B6ZCY8	gi|524884099|ref|XP_005098673.1|	6	11.6848	6	10	151.53	1DA3,1DB4,1DB3,
HACG01040245	A0A0B7B4S1	gi|524884293|ref|XP_005098768.1|	11	20.3242	11	21	322.367	1DA2,1DA3,1DA7,1DA8,1DA10,1DB2,1DB3,1DB8,1DB4,1DB10,
HACG01019404	A0A0B6ZCF1	gi|524884406|ref|XP_005098823.1|	10	30.1887	10	15	116.427	1DA7,1DB7,1DB1,
HACG01049652	A0A0B7BUD2	gi|524884410|ref|XP_005098825.1|	3	14.5455	3	5	97.18	1DB9,1DB10,
HACG01020001	A0A0B6ZG90	gi|524884410|ref|XP_005098825.1|	6	40.2439	6	10	171.71	1DB9,1DB10,
HACG01020693	A0A0B6ZG89	gi|524884444|ref|XP_005098842.1|	5	22.9268	5	13	404.618	1DA7,1DA8,1DB7,1DB8,
HACG01027372	A0A0B7A0W1	gi|524884451|ref|XP_005098845.1|	14	44.6475	14	27	420.163	1DA7,1DB7,1DB8,
HACG01024236	A0A0B6ZTD9	gi|524884503|ref|XP_005098871.1|	5	32.4841	5	16	192.495	1DA9,1DB10,1DB13,1DA10,
HACG01022238	A0A0B6ZKQ5	gi|524884503|ref|XP_005098871.1|	7	45.7143	7	22	199.675	1DA10,1DB9,1DB10,1DB11,1DB13,
HACG01005206	A0A0B6Y8C3	gi|524884550|ref|XP_005098894.1|	2	5.63798	2	2	51.21	1DB6,
HACG01005634	A0A0B6Y8N4	gi|524884624|ref|XP_005098931.1|	3	40.8163	4	11	248.654	1DA10,1DB10,1DB13,
HACG01003879	A0A0B6Y3N4	gi|524884624|ref|XP_005098931.1|	4	36.0294	5	15	366.767	1DA10,1DA11,1DB9,1DB11,1DB12,1DB13,
HACG01013182	A0A0B6YVC0	gi|524884630|ref|XP_005098934.1|	11	38.7692	11	45	1118.37	1DA1,1DA2,1DA3,1DA4,1DA5,1DA6,1DA7,1DB1,1DB5,1DB6,1DB7,1DB8,
HACG01042413	A0A0B7B8D3	gi|524884697|ref|XP_005098967.1|	5	14.7253	5	5	99.37	1DB4,
HACG01032631	A0A0B7AHH6	gi|524884737|ref|XP_005098987.1|	2	10.2564	2	9	249.013	1DA3,1DA4,1DA7,1DA8,1DB1,1DB3,1DB4,1DA11,
HACG01032634	A0A0B7AET5	gi|524884737|ref|XP_005098987.1|	12	38.9791	13	33	688.695	1DA5,1DA6,1DB5,1DB6,1DB7,
HACG01032633	A0A0B7AFG9	gi|524884737|ref|XP_005098987.1|	21	56.8129	22	70	1210.97	1DA2,1DA3,1DA4,1DA5,1DA6,1DA7,1DB3,1DB4,1DB5,1DB6,1DB1,1DB7,
HACG01006344	A0A0B6YAI0	gi|524884820|ref|XP_005099026.1|	3	24.4048	3	10	200.4	1DA10,1DB11,1DB12,1DB13,
HACG01026362	A0A0B6ZXZ0	gi|524884828|ref|XP_005099030.1|	3	9.29648	3	5	119.44	1DB4,1DB5,
HACG01022531	A0A0B6ZNH1	gi|524884830|ref|XP_005099031.1|	2	5.92992	2	3	32.7967	1DA5,1DB5,
HACG01017026	A0A0B6Z7I4	gi|524884878|ref|XP_005099053.1|	9	39.0244	9	21	385.293	1DA8,1DB8,1DB9,
HACG01049606	A0A0B7BVV6	gi|524884884|ref|XP_005099056.1|	8	55.1351	8	19	185.29	1DA8,1DA9,1DB10,1DB13,
HACG01045038	A0A0B7BG01	gi|524884921|ref|XP_005099073.1|	2	5.04032	2	2	56.75	1DB5,
HACG01044248	A0A0B7BDQ0	gi|524884921|ref|XP_005099073.1|	18	55.902	18	807	18648.6	1DA1,1DA2,1DA3,1DA4,1DA5,1DA6,1DA7,1DA8,1DA9,1DA10,1DA11,1DA12,1DB1,1DB2,1DB3,1DB4,1DB5,1DB6,1DB8,1DB9,1DB10,1DB11,1DB12,1DB7,1DB13,
HACG01017813	A0A0B6Z824	gi|524884955|ref|XP_005099089.1|	6	29.4671	6	14	391.466	1DA5,1DA6,1DB1,1DB5,1DB6,
HACG01031431	A0A0B7AE17	gi|524884995|ref|XP_005099109.1|	4	9.3633	4	4	76.46	1DB1,
HACG01003596	A0A0B6Y3R9	gi|524885029|ref|XP_005099126.1|	6	32.1168	6	8	45.355	1DB10,1DB13,
HACG01048525	A0A0B7BTA4	gi|524885143|ref|XP_005099182.1|	2	9.00474	3	3	93.37	1DA4,1DB2,
HACG01032435	A0A0B7AH94	gi|524885145|ref|XP_005099183.1|	5	13.8655	5	6	170.08	1DB4,
HACG01002134	A0A0B6XYM5	gi|524885193|ref|XP_005099207.1|	11	21.5385	11	23	488.72	1DA3,1DB3,1DB1,1DB4,1DB2,
HACG01031021	A0A0B7ACZ7	gi|524885197|ref|XP_005099209.1|	12	47.9452	12	14	233.134	1DA7,1DB7,
HACG01036615	A0A0B7AUD8	gi|524885217|ref|XP_005099218.1|	4	20.3774	5	7	117.613	1DB6,1DB7,
HACG01036620	A0A0B7AUE2	gi|524885219|ref|XP_005099219.1|	1	15.7895	3	3	86.55	1DB7,
HACG01044749	A0A0B7BHI0	gi|524885248|ref|XP_005099233.1|	4	23.7374	4	6	86.0433	1DB9,1DB10,
HACG01006393	A0A0B6YAW3	gi|524885248|ref|XP_005099233.1|	13	82.0513	13	27	333.255	1DA8,1DA9,1DB9,1DB10,
HACG01032512	A0A0B7AFG0	gi|524885272|ref|XP_005099245.1|	5	54.9296	5	31	1067.12	1DA9,1DA10,1DB9,1DB10,1DB11,1DB12,1DB13,
HACG01030474	A0A0B7A8M4	gi|524885272|ref|XP_005099245.1|	6	63.2353	6	39	1310.57	1DA10,1DA11,1DA12,1DB10,1DB11,1DB12,1DB13,
HACG01041789	A0A0B7B5N3	gi|524885349|ref|XP_005099283.1|	2	51.1905	4	10	77.64	1DA9,1DB8,1DB9,1DB10,
HACG01005811	A0A0B6YA22	gi|524885349|ref|XP_005099283.1|	3	33.6788	5	19	247.745	1DA7,1DA8,1DA9,1DB8,1DB9,1DB10,1DB1,1DB6,
HACG01035764	A0A0B7ANL1	gi|524885451|ref|XP_005099333.1|	2	7.02811	2	2	35.99	1DB4,
HACG01045194	A0A0B7BFI2	gi|524885518|ref|XP_005099365.1|	2	11.2403	2	2	59.52	1DB1,
HACG01024398	A0A0B6ZRQ2	gi|524885520|ref|XP_005099366.1|	18	82.1656	18	188	2296.97	1DA6,1DA7,1DA8,1DA9,1DA10,1DA12,1DB8,1DB10,1DB11,1DB13,1DB9,1DB12,
HACG01019634	A0A0B6ZD53	gi|524885581|ref|XP_005099396.1|	20	71.028	20	106	1541.04	1DA4,1DA5,1DA6,1DA7,1DA8,1DA9,1DA10,1DA11,1DB1,1DB7,1DB9,1DB10,1DB11,1DB12,1DB13,1DB8,
HACG01034464	A0A0B7AJZ1	gi|524885593|ref|XP_005099402.1|	4	35.0427	6	35	1019.48	1DA8,1DB1,1DB7,1DB8,1DB9,1DB10,
HACG01034463	A0A0B7AKC6	gi|524885593|ref|XP_005099402.1|	8	48.2906	9	34	1083.02	1DA7,1DA8,1DB6,1DB8,1DB9,
HACG01002182	A0A0B6XYA1	gi|524885619|ref|XP_005099415.1|	9	50.566	10	25	526.24	1DA7,1DA8,1DB8,1DB1,1DB9,
HACG01042129	A0A0B7B6Q3	gi|524885623|ref|XP_005099417.1|	2	34.0136	4	5	47.78	1DB11,1DB13,
HACG01029902	A0A0B7A7I8	gi|524885625|ref|XP_005099418.1|	2	63.2353	3	5	87.2	1DA11,1DB11,1DB12,
HACG01037416	A0A0B7ATT1	gi|524885654|ref|XP_005099432.1|	2	8.7766	2	2	34.63	1DB6,
HACG01040870	A0A0B7B6I5	gi|524885681|ref|XP_005099445.1|	2	5.68182	2	2	26.5	1DB6,
HACG01040760	A0A0B7B682	gi|524885703|ref|XP_005099456.1|	10	23.4177	10	17	358.388	1DA4,1DB4,
HACG01023787	A0A0B6ZQH8	gi|524885795|ref|XP_005099501.1|	3	68.2493	34	165	4074.93	1DA2,1DA3,1DA4,1DA5,1DB5,
HACG01019434	A0A0B6ZCI2	gi|524885795|ref|XP_005099501.1|	9	69.8864	16	94	1729.78	1DA4,1DA5,1DA8,1DB5,1DB9,1DA6,1DA7,1DB1,1DB4,1DB7,1DB8,1DB11,1DB13,1DA9,1DB10,
HACG01023784	A0A0B6ZPT3	gi|524885795|ref|XP_005099501.1|	12	67.0807	37	239	5797.17	1DA2,1DA3,1DA4,1DA5,1DB1,1DB3,1DB4,1DB5,1DB6,1DB7,1DB9,1DB10,
HACG01019777	A0A0B6ZDX9	gi|524885821|ref|XP_005099514.1|	7	44.484	7	11	196.074	1DA7,1DB7,
HACG01032814	A0A0B7AF85	gi|524885844|ref|XP_005099525.1|	4	10.3286	4	5	69.86	1DA6,1DB6,
HACG01023843	A0A0B6ZQ55	gi|524885854|ref|XP_005099530.1|	16	72.5225	16	236	3886.59	1DA1,1DA2,1DA3,1DA7,1DA8,1DA9,1DB1,1DB2,1DB3,1DB7,1DB8,1DB9,1DB10,1DB11,1DB12,1DA4,1DA5,1DA6,1DA10,1DA11,1DA12,1DB4,1DB6,1DB13,
HACG01025524	A0A0B6ZUU6	gi|524885898|ref|XP_005099550.1|	22	48.893	22	30	493.033	1DA4,1DB5,
HACG01037970	A0A0B7AY55	gi|524885955|ref|XP_005099578.1|	2	6.45161	2	2	66.22	1DB6,
HACG01040470	A0A0B7B5F4	gi|524886028|ref|XP_005099614.1|	6	49.2424	6	14	219.103	1DA9,1DB13,1DA10,1DB10,
HACG01039418	A0A0B7AZS2	gi|524886190|ref|XP_005099692.1|	2	2.54582	2	3	72.3967	1DB1,1DB2,
HACG01034077	A0A0B7AK60	gi|524886261|ref|XP_005099727.1|	1	47.313	41	130	2703.39	1DB1,1DB2,
HACG01040686	A0A0B7B5J8	gi|524886261|ref|XP_005099727.1|	13	20.132	13	23	562.301	1DA1,1DB1,1DB2,1DA2,
HACG01034068	A0A0B7AJF8	gi|524886261|ref|XP_005099727.1|	24	49.4929	43	322	7707.43	1DA1,1DA2,1DA3,1DA4,1DB1,1DB2,1DB3,1DB4,1DA5,1DB5,1DA6,1DA8,1DA9,1DA7,1DB7,
HACG01030660	A0A0B7AC58	gi|524886263|ref|XP_005099728.1|	12	34.4891	12	51	2015.3	1DA1,1DA2,1DA3,1DA4,1DA9,1DA6,1DB5,1DB8,1DA5,1DA7,1DA8,1DA10,1DA11,
HACG01043386	A0A0B7BD61	gi|524886263|ref|XP_005099728.1|	20	30.5147	20	57	1002.32	1DA1,1DA2,1DA3,1DB1,1DB2,1DB3,
HACG01020253	A0A0B6ZF05	gi|524886285|ref|XP_005099739.1|	3	33.7349	3	6	92.0433	1DA7,1DB7,
HACG01005669	A0A0B6Y8R1	gi|524886289|ref|XP_005099741.1|	2	10.9375	2	2	29.63	1DB8,
HACG01042644	A0A0B7B867	gi|524886299|ref|XP_005099746.1|	14	63.5983	14	29	520.409	1DA8,1DB8,1DB9,
HACG01031043	A0A0B7AAY4	gi|524886313|ref|XP_005099753.1|	2	9.77011	2	6	141.103	1DA1,1DA2,1DA3,1DB2,
HACG01043874	A0A0B7BBK3	gi|524886402|ref|XP_005099797.1|	2	4.02385	2	3	70.07	1DA4,1DB4,
HACG01017417	A0A0B6Z7B1	gi|524886408|ref|XP_005099800.1|	2	12.0192	2	4	42.19	1DA8,1DB8,1DB9,
HACG01012597	A0A0B6YTN4	gi|524886408|ref|XP_005099800.1|	7	25.4808	7	12	134.61	1DA8,1DB8,1DB9,
HACG01011292	A0A0B6YPS1	gi|524886483|ref|XP_005099835.1|	4	31.25	4	6	101.98	1DB7,
HACG01050376	A0A0B7BXY3	gi|524886483|ref|XP_005099835.1|	4	30.3279	4	4	35.5	1DA6,1DB7,
HACG01046014	A0A0B7BHR3	gi|524886540|ref|XP_005099863.1|	8	32.9861	8	11	306.12	1DA7,1DB7,
HACG01005621	A0A0B6Y9I8	gi|524886568|ref|XP_005099877.1|	3	40.678	3	8	167.295	1DA10,1DB11,1DB13,1DA11,1DB12,
HACG01049684	A0A0B7BTM1	gi|524886570|ref|XP_005099878.1|	5	48.5915	5	20	682.97	1DA11,1DB11,1DB12,1DB13,
HACG01034151	A0A0B7AM21	gi|524886658|ref|XP_005099922.1|	7	20.1031	7	8	195.285	1DA6,1DB6,
HACG01011327	A0A0B6YPV7	gi|524886662|ref|XP_005099924.1|	4	14.2433	4	6	95.25	1DA6,1DB7,
HACG01041003	A0A0B7B6C7	gi|524886695|ref|XP_005099940.1|	15	59.2199	15	39	845.625	1DA4,1DA6,1DA7,1DB7,1DB8,
HACG01039798	A0A0B7B0V2	gi|524886707|ref|XP_005099946.1|	6	17.0854	6	12	281.34	1DA5,1DA6,1DB1,1DB5,1DB6,
HACG01027314	A0A0B6ZZU9	gi|524886715|ref|XP_005099950.1|	7	13.0201	8	11	185.705	1DB3,1DB4,
HACG01002191	A0A0B6XZV0	gi|524886760|ref|XP_005099972.1|	2	18.5484	2	3	42.2067	1DA7,1DB7,
HACG01043212	A0A0B7BB06	gi|524886817|ref|XP_005100000.1|	17	43.4889	17	80	1716.51	1DA2,1DA3,1DA4,1DA5,1DA6,1DA8,1DA11,1DB1,1DB2,1DB3,1DB4,1DB5,1DB6,1DB9,1DA9,1DB7,
HACG01046318	A0A0B7BJQ6	gi|524886950|ref|XP_005100065.1|	6	20.5521	6	18	515.24	1DA1,1DA2,1DA4,1DA5,1DA6,1DA7,1DA8,1DB1,1DB6,
HACG01046321	A0A0B7BLF2	gi|524886950|ref|XP_005100065.1|	7	30.6748	7	8	171.31	1DB7,
HACG01027971	A0A0B7A468	gi|524886950|ref|XP_005100065.1|	8	20.9877	8	12	135.487	1DA6,1DB6,1DB7,
HACG01025526	A0A0B6ZVN1	gi|524886963|ref|XP_005100071.1|	8	11.7909	8	11	177.084	1DB1,1DB3,
HACG01037812	A0A0B7AVK4	gi|524887138|ref|XP_005100158.1|	6	33.3333	6	11	177.097	1DA11,1DB11,1DB12,1DB1,
HACG01035287	A0A0B7AND8	gi|524887166|ref|XP_005100172.1|	2	17.9775	3	4	53.55	1DB9,
HACG01011468	A0A0B6YQ16	gi|524887166|ref|XP_005100172.1|	3	27.1676	4	7	80.8814	1DB9,1DB10,
HACG01037407	A0A0B7AUG7	gi|524887169|ref|XP_005100173.1|	6	24.359	6	7	116.31	1DA6,1DB7,1DB6,
HACG01002357	A0A0B6XYR4	gi|524887212|ref|XP_005100194.1|	3	15.6716	3	3	32.0967	1DB10,
HACG01049694	A0A0B7BTN2	gi|524887214|ref|XP_005100195.1|	5	67.1141	6	13	224.463	1DA10,1DB10,1DB13,
HACG01013126	A0A0B6YW81	gi|524887214|ref|XP_005100195.1|	6	58.1081	7	16	310.983	1DA10,1DB10,1DB13,
HACG01019779	A0A0B6ZDH5	gi|524887216|ref|XP_005100196.1|	3	21.9731	3	3	149.287	1DB4,
HACG01026850	A0A0B7A180	gi|524887218|ref|XP_005100197.1|	3	28.0098	8	10	250.76	1DA3,1DB3,
HACG01026853	A0A0B6ZYP3	gi|524887218|ref|XP_005100197.1|	3	18.1388	9	11	303.569	1DB3,
HACG01028762	A0A0B7A4Q0	gi|524887250|ref|XP_005100213.1|	5	19.661	5	7	163.424	1DB8,
HACG01016072	A0A0B6Z3M6	gi|524887256|ref|XP_005100216.1|	4	32.0442	4	4	119.31	1DB9,
HACG01027287	A0A0B7A0N0	gi|524887258|ref|XP_005100217.1|	8	21.5686	8	12	172.96	1DA6,1DB6,
HACG01026369	A0A0B6ZX77	gi|524887260|ref|XP_005100218.1|	4	14.652	4	7	108.943	1DA6,1DB1,1DB6,1DB7,
HACG01040629	A0A0B7B2E0	gi|524887278|ref|XP_005100227.1|	2	6.3253	2	2	56.33	1DB5,
HACG01045421	A0A0B7BIZ6	gi|524887319|ref|XP_005100247.1|	6	26.3889	6	11	274.087	1DA6,1DB6,
HACG01022358	A0A0B6ZL17	gi|524887384|ref|XP_005100278.1|	11	13.4094	11	25	445.97	1DA2,1DA3,1DB1,1DB2,1DB3,1DB4,
HACG01016058	A0A0B6Z317	gi|524887394|ref|XP_005100283.1|	6	35.2273	6	16	150.005	1DA9,1DB10,1DB13,
HACG01035921	A0A0B7AP15	gi|524887465|ref|XP_005100318.1|	2	30.137	2	2	42.49	1DB5,
HACG01045393	A0A0B7BH12	gi|524887498|ref|XP_005100334.1|	3	6.86869	3	4	144.95	1DB5,
HACG01034872	A0A0B7AM77	gi|524887580|ref|XP_005100374.1|	1	10.2493	4	5	69.42	1DB5,
HACG01034871	A0A0B7AP07	gi|524887580|ref|XP_005100374.1|	5	13.2	6	12	242.637	1DA4,1DB4,1DB5,
HACG01019871	A0A0B6ZFV9	gi|524887592|ref|XP_005100380.1|	25	71.9794	25	93	1940.53	1DA3,1DA4,1DA5,1DA6,1DA7,1DA8,1DB3,1DB4,1DB5,1DB6,1DB7,1DB1,
HACG01027805	A0A0B7A3W4	gi|524887715|ref|XP_005100441.1|	7	17.1306	7	10	128.49	1DB1,1DB3,1DB5,1DB4,
HACG01039110	A0A0B7B1L1	gi|524887733|ref|XP_005100450.1|	2	20.8696	2	2	27.9	1DB7,
HACG01023461	A0A0B6ZR72	gi|524887834|ref|XP_005100500.1|	5	38.8889	5	15	197.317	1DA9,1DA10,1DA11,1DB13,
HACG01032945	A0A0B7AIQ0	gi|524887883|ref|XP_005100524.1|	7	38.0952	7	16	200.1	1DA6,1DA7,1DA8,1DB8,1DB9,
HACG01045757	A0A0B7BIB2	gi|524887886|ref|XP_005100525.1|	5	23.3503	5	14	304.9	1DA8,1DB8,1DB9,
HACG01018386	A0A0B6ZBE4	gi|524887964|ref|XP_005100561.1|	4	8.59873	4	8	137.075	1DB1,1DB2,
HACG01038048	A0A0B7AVP6	gi|524887980|ref|XP_005100569.1|	5	16.1692	5	6	145.2	1DA6,1DB6,1DB5,
HACG01034892	A0A0B7AM95	gi|524888001|ref|XP_005100579.1|	4	28.8235	4	10	140.77	1DA7,1DA8,1DA9,1DB8,1DB9,1DB10,1DB1,
HACG01036912	A0A0B7ASC0	gi|524888015|ref|XP_005100586.1|	5	11.5079	5	5	95.81	1DB5,
HACG01043923	A0A0B7BCQ6	gi|524888025|ref|XP_005100590.1|	3	27.5168	3	5	79.12	1DA10,1DB13,
HACG01046972	A0A0B7BLR9	gi|524888025|ref|XP_005100590.1|	5	52.027	5	8	209.575	1DA10,1DB13,
HACG01037545	A0A0B7AWW6	gi|524888067|ref|XP_005100610.1|	15	19.6704	15	44	764.47	1DA1,1DA2,1DA3,1DB1,1DB2,1DA4,1DA9,1DB3,
HACG01037544	A0A0B7ATP5	gi|524888089|ref|XP_005100621.1|	3	14.5038	3	4	111.68	1DA2,1DB2,
HACG01037548	A0A0B7AUA5	gi|524888089|ref|XP_005100621.1|	5	21.3523	5	7	167.254	1DA1,1DA2,1DB1,1DB2,
HACG01037543	A0A0B7AU97	gi|524888089|ref|XP_005100621.1|	7	25.4902	7	13	213.344	1DA1,1DA2,1DB2,1DB1,
HACG01024147	A0A0B6ZRM6	gi|524888237|ref|XP_005100694.1|	3	22.619	3	7	213.517	1DA11,1DA12,1DB11,1DB12,
HACG01037613	A0A0B7AUJ0	gi|524888358|ref|XP_005100750.1|	1	4.30528	2	6	83.1433	1DA4,1DB4,
HACG01040051	A0A0B7B3P8	gi|524888358|ref|XP_005100750.1|	26	56.2249	27	103	2155.29	1DA3,1DA4,1DB1,1DB4,1DB5,1DA5,1DB3,1DB6,
HACG01019961	A0A0B6ZG48	gi|524888414|ref|XP_005100778.1|	5	28.7449	5	11	189.65	1DA8,1DB8,1DB9,
HACG01027869	A0A0B7A1C1	gi|524888476|ref|XP_005100809.1|	2	24.3478	2	3	130.85	1DB7,
HACG01027871	A0A0B7A3V0	gi|524888480|ref|XP_005100811.1|	4	19.2661	6	10	242.56	1DA6,1DB6,
HACG01027868	A0A0B7A1M8	gi|524888480|ref|XP_005100811.1|	5	23.6196	7	8	118.48	1DA6,1DB6,
HACG01046344	A0A0B7BIM8	gi|524888508|ref|XP_005100824.1|	3	62.069	3	19	271.026	1DA1,1DA2,1DA3,1DA4,1DB2,1DB3,1DB4,
HACG01046336	A0A0B7BLG3	gi|524888508|ref|XP_005100824.1|	92	63.2189	116	847	16624.6	1DA1,1DA2,1DA4,1DA7,1DB2,1DB3,1DB4,1DB7,1DB1,1DB6,1DB9,1DB10,1DA3,1DA9,1DA5,1DA6,1DA8,1DA10,1DB8,1DB5,1DA11,1DB11,1DB12,
HACG01026233	A0A0B6ZWX3	gi|524888516|ref|XP_005100828.1|	2	4.45151	2	2	59.19	1DB4,
HACG01037465	A0A0B7AUN9	gi|524888539|ref|XP_005100839.1|	8	20.6107	8	19	463.788	1DA3,1DA5,1DB5,1DA4,1DB1,1DB2,1DB3,1DB4,
HACG01048179	A0A0B7BP32	gi|524888600|ref|XP_005100869.1|	4	19.0476	4	5	66.57	1DA7,1DB7,
HACG01002350	A0A0B6Y0Y8	gi|524888649|ref|XP_005100893.1|	4	51.5464	4	6	69.9933	1DA12,1DB12,
HACG01005551	A0A0B6Y9B5	gi|524888693|ref|XP_005100913.1|	2	4.55696	2	3	24.4067	1DB1,
HACG01046387	A0A0B7BIS2	gi|524888709|ref|XP_005100920.1|	2	9.14634	4	4	46.05	1DB1,
HACG01046932	A0A0B7BKD1	gi|524888713|ref|XP_005100922.1|	2	5.29532	2	2	89.47	1DB1,
HACG01046053	A0A0B7BJ21	gi|524888744|ref|XP_005100937.1|	3	13.0435	3	3	87.76	1DB1,
HACG01044626	A0A0B7BGS3	gi|524888756|ref|XP_005100943.1|	6	19.2878	6	8	151.565	1DB8,
HACG01012299	A0A0B6YUJ3	gi|524888807|ref|XP_005100968.1|	5	9.84952	5	13	333.388	1DB1,1DB3,1DB4,1DB2,
HACG01026473	A0A0B6ZXM4	gi|524888919|ref|XP_005101023.1|	2	8.62069	2	2	40.09	1DB7,
HACG01036847	A0A0B7ASV3	gi|524889085|ref|XP_005101104.1|	4	28.0193	4	7	140.713	1DA3,1DB3,1DB4,
HACG01030425	A0A0B7ABD8	gi|524889104|ref|XP_005101113.1|	10	29.9766	10	19	347.686	1DA5,1DB5,1DB6,
HACG01001503	A0A0B6XWW7	gi|524889160|ref|XP_005101141.1|	2	17.9641	2	4	108.3	1DA3,1DB3,
HACG01003332	A0A0B6Y1L9	gi|524889160|ref|XP_005101141.1|	2	31.7308	2	3	71.7333	1DB2,1DB3,
HACG01030153	A0A0B7A8D1	gi|524889199|ref|XP_005101160.1|	5	14.7806	5	9	169.613	1DB1,1DB5,1DB4,1DB2,
HACG01026348	A0A0B6ZX61	gi|524889251|ref|XP_005101186.1|	4	23.8462	4	11	142.921	1DA7,1DA8,1DB8,1DB9,
HACG01040202	A0A0B7B2H5	gi|524889332|ref|XP_005101225.1|	5	4.92572	5	5	76.82	1DB2,
HACG01028544	A0A0B7A3A1	gi|524889396|ref|XP_005101256.1|	3	9.82659	3	3	38.6733	1DB5,
HACG01030986	A0A0B7ACW1	gi|524889459|ref|XP_005101285.1|	3	8.59539	3	3	85.6433	1DB5,
HACG01018152	A0A0B6Z9I6	gi|524889482|ref|XP_005101296.1|	13	36.2745	13	48	912.396	1DA1,1DA2,1DA3,1DA4,1DB1,1DB3,1DB4,1DB2,
HACG01022210	A0A0B6ZMY7	gi|524889486|ref|XP_005101298.1|	2	15.873	2	2	48.22	1DB9,
HACG01047429	A0A0B7BLU0	gi|524889526|ref|XP_005101318.1|	18	44.0748	18	48	1113.06	1DA4,1DA5,1DA6,1DA7,1DB6,1DB5,1DA8,1DB4,1DB7,1DB3,
HACG01005757	A0A0B6Y8F9	gi|524889574|ref|XP_005101342.1|	2	7.87671	2	2	52.8	1DB7,
HACG01040594	A0A0B7B2C0	gi|524889607|ref|XP_005101358.1|	3	12.7946	3	5	66.49	1DA6,1DB6,
HACG01049469	A0A0B7BSX7	gi|524889661|ref|XP_005101385.1|	3	9.55056	3	8	116.695	1DB1,1DB2,1DB4,1DB5,
HACG01024431	A0A0B6ZTX0	gi|524889708|ref|XP_005101408.1|	4	13.2911	4	8	173	1DB1,1DB2,1DB5,
HACG01012855	A0A0B6YW55	gi|524889720|ref|XP_005101414.1|	6	41.2698	6	10	151.13	1DA7,1DA8,1DB8,1DB1,1DB7,
HACG01033128	A0A0B7AGT8	gi|524889734|ref|XP_005101421.1|	2	18.125	2	2	50.33	1DB3,
HACG01033126	A0A0B7AIW5	gi|524889734|ref|XP_005101421.1|	4	12.1212	4	4	57.06	1DB9,
HACG01033125	A0A0B7AJB3	gi|524889734|ref|XP_005101421.1|	6	10.2689	6	9	255.526	1DA3,1DB3,1DB2,
HACG01027769	A0A0B7A138	gi|524889764|ref|XP_005101435.1|	3	33.0827	3	10	123.74	1DA3,1DA4,1DB4,1DB3,
HACG01045380	A0A0B7BJ91	gi|524889772|ref|XP_005101439.1|	7	28.0112	7	12	297.057	1DA6,1DB1,1DB4,1DB5,1DB7,1DB6,
HACG01027890	A0A0B7A445	gi|524889859|ref|XP_005101481.1|	4	16.0494	4	5	76.09	1DB1,1DB2,
HACG01033694	A0A0B7AHT5	gi|524889887|ref|XP_005101495.1|	8	33.7621	8	12	252.193	1DA7,1DB7,
HACG01029152	A0A0B7A5V9	gi|524889992|ref|XP_005101546.1|	5	53.125	5	9	80.3322	1DB7,1DB8,
HACG01049511	A0A0B7BVH8	gi|524889992|ref|XP_005101546.1|	5	40	8	14	281.54	1DA8,1DB8,1DB9,
HACG01029159	A0A0B7A502	gi|524889992|ref|XP_005101546.1|	6	57.2368	8	21	428.093	1DA6,1DA8,1DB7,1DB8,1DA7,
HACG01042544	A0A0B7B7V3	gi|524890066|ref|XP_005101582.1|	7	18.2028	7	10	121.82	1DA2,1DB2,1DA4,1DB4,
HACG01040485	A0A0B7B5H3	gi|524890066|ref|XP_005101582.1|	9	11.8694	10	13	166.073	1DA2,1DB2,1DB3,
HACG01042546	A0A0B7BAU4	gi|524890066|ref|XP_005101582.1|	11	27.619	12	23	505.765	1DA1,1DB2,1DA2,1DB3,1DB4,1DA8,
HACG01048198	A0A0B7BQ25	gi|524890096|ref|XP_005101597.1|	2	23.2	2	4	140.82	1DA12,1DB11,1DB12,
HACG01045110	A0A0B7BIL6	gi|524890120|ref|XP_005101609.1|	11	39.0164	11	17	200.727	1DA6,1DA7,1DA12,1DB7,1DB1,
HACG01026656	A0A0B7A0A0	gi|524890176|ref|XP_005101637.1|	13	34.8399	13	22	384.863	1DA5,1DB4,1DB5,
HACG01005415	A0A0B6Y9Z5	gi|524890204|ref|XP_005101650.1|	5	42.4437	12	22	434.149	1DA7,1DB7,
HACG01038665	A0A0B7B0A6	gi|524890204|ref|XP_005101650.1|	8	44.4444	12	23	398.082	1DA7,1DB7,
HACG01005416	A0A0B6Y8W9	gi|524890208|ref|XP_005101652.1|	2	42.7586	11	16	270.608	1DB7,
HACG01030947	A0A0B7AAX7	gi|524890221|ref|XP_005101658.1|	7	13.877	7	8	121.135	1DB3,
HACG01045212	A0A0B7BGT3	gi|524890233|ref|XP_005101664.1|	2	3.38645	2	2	53.85	1DB3,
HACG01023989	A0A0B6ZQE0	gi|524890263|ref|XP_005101679.1|	2	3.98724	2	2	36.5	1DB3,
HACG01040917	A0A0B7B4H4	gi|524890263|ref|XP_005101679.1|	7	14.1994	7	14	255.073	1DB1,1DB2,1DB3,1DB4,
HACG01032413	A0A0B7AEP9	gi|524890281|ref|XP_005101688.1|	3	18.4906	3	4	107.17	1DA8,1DB8,
HACG01044310	A0A0B7BG74	gi|524890370|ref|XP_005101732.1|	5	9.57447	5	8	121.555	1DB1,1DB4,1DB3,
HACG01043147	A0A0B7BAV6	gi|524890376|ref|XP_005101735.1|	4	27.4194	4	11	466.67	1DA4,1DA5,1DA6,1DA8,1DB6,1DB7,
HACG01022339	A0A0B6ZKN7	gi|524890384|ref|XP_005101739.1|	2	18.2741	2	2	53.29	1DB10,
HACG01017906	A0A0B6Z9Z4	gi|524890516|ref|XP_005101804.1|	2	12.4402	2	4	62.8	1DB7,
HACG01032864	A0A0B7AFC7	gi|524890561|ref|XP_005101826.1|	3	7.25275	3	4	67.64	1DA6,1DB6,
HACG01011620	A0A0B6YQU2	gi|524890575|ref|XP_005101832.1|	4	12.6437	4	5	53.03	1DB1,1DB2,
HACG01023998	A0A0B6ZQL8	gi|524890590|ref|XP_005101839.1|	5	22.2222	5	5	107.21	1DA6,1DB6,
HACG01044966	A0A0B7BHM8	gi|524890599|ref|XP_005101843.1|	9	32.8313	9	11	238.922	1DA6,1DB6,1DB7,
HACG01034211	A0A0B7AJA0	gi|524890683|ref|XP_005101885.1|	19	19.9833	19	25	454.22	1DA3,1DB3,
HACG01041509	A0A0B7B4U6	gi|524890724|ref|XP_005101905.1|	1	84	18	58	1116.96	1DB5,
HACG01033928	A0A0B7AIW3	gi|524890794|ref|XP_005101939.1|	6	33.0357	6	8	144.445	1DA8,1DB8,1DB9,
HACG01023415	A0A0B6ZRB0	gi|524890817|ref|XP_005101950.1|	2	12.766	2	3	58.66	1DB10,
HACG01035723	A0A0B7AP29	gi|524890839|ref|XP_005101961.1|	8	38.7931	8	15	150.047	1DB8,1DB9,
HACG01035809	A0A0B7ANP5	gi|524890869|ref|XP_005101976.1|	1	5.72792	2	2	53.72	1DB5,
HACG01035810	A0A0B7ARY3	gi|524890869|ref|XP_005101976.1|	7	22.3618	7	11	206.325	1DA4,1DA5,1DB5,
HACG01024969	A0A0B6ZT56	gi|524890881|ref|XP_005101982.1|	2	12.4	2	3	83.4933	1DA8,1DB8,
HACG01031108	A0A0B7AB72	gi|524890899|ref|XP_005101991.1|	1	16.4835	2	2	30.6	1DB12,
HACG01031106	A0A0B7AD80	gi|524890899|ref|XP_005101991.1|	2	19.2982	2	2	53	1DA12,
HACG01035910	A0A0B7AS76	gi|524890899|ref|XP_005101991.1|	3	11.0825	3	3	97.7267	1DA12,
HACG01031107	A0A0B7ABG4	gi|524890899|ref|XP_005101991.1|	8	15.1618	8	30	507.833	1DA11,1DA12,1DB11,1DB12,
HACG01041089	A0A0B7B3S1	gi|524891164|ref|XP_005102118.1|	2	17.0213	2	3	115.98	1DB10,1DB13,
HACG01019579	A0A0B6ZD19	gi|524891178|ref|XP_005102125.1|	5	25.7937	6	10	167.94	1DA7,1DB8,
HACG01033336	A0A0B7AJI0	gi|524891306|ref|XP_005102188.1|	8	26.9841	8	15	368.877	1DA8,1DB8,1DB9,
HACG01029477	A0A0B7A6Q3	gi|524891320|ref|XP_005102195.1|	2	53.5714	2	3	72.4667	1DA7,1DB7,
HACG01026270	A0A0B6ZZG5	gi|524891363|ref|XP_005102216.1|	6	15.8397	6	8	117.76	1DA4,1DB4,
HACG01034189	A0A0B7AJ82	gi|524891407|ref|XP_005102237.1|	3	9.88701	3	4	63.08	1DB6,1DB7,
HACG01040389	A0A0B7B1N2	gi|524891424|ref|XP_005102245.1|	15	34.2391	15	29	660.086	1DA3,1DA4,1DA8,1DB1,1DB2,1DB4,1DB5,
HACG01005477	A0A0B6Y7L8	gi|524891426|ref|XP_005102246.1|	2	9.88024	2	2	26.23	1DB7,
HACG01031369	A0A0B7AB43	gi|524891426|ref|XP_005102246.1|	13	51.8625	13	34	657.602	1DA4,1DA6,1DA7,1DB1,1DB5,1DB6,1DA5,1DB4,
HACG01016205	A0A0B6Z5T9	gi|524891440|ref|XP_005102253.1|	2	13.6929	2	2	101.08	1DB9,
HACG01027644	A0A0B7A0U2	gi|524891478|ref|XP_005102272.1|	2	10.0402	2	5	88.37	1DB1,1DB8,1DB9,
HACG01028893	A0A0B7A4L9	gi|524891530|ref|XP_005102298.1|	4	8.25147	4	4	50.66	1DB5,
HACG01020713	A0A0B6ZGA6	gi|524891574|ref|XP_005102320.1|	6	32.0856	6	9	131.716	1DB9,
HACG01017471	A0A0B6Z8Q5	gi|524891582|ref|XP_005102324.1|	2	23.0769	2	6	66.4967	1DA12,1DB11,1DB12,
HACG01018589	A0A0B6ZA53	gi|524891584|ref|XP_005102325.1|	12	38.2429	12	17	342.862	1DA5,1DA6,1DB6,
HACG01035715	A0A0B7ARP3	gi|524891634|ref|XP_005102350.1|	8	38.4868	8	24	346.48	1DA6,1DA7,1DA8,1DB7,
HACG01038126	A0A0B7AY65	gi|524891679|ref|XP_005102372.1|	13	47.1125	13	47	1022.55	1DA3,1DA4,1DA5,1DA6,1DA7,1DB1,1DB6,1DB7,1DB8,
HACG01033317	A0A0B7AHS8	gi|524891741|ref|XP_005102403.1|	3	13.5417	3	7	120.716	1DA7,1DB7,
HACG01045708	A0A0B7BHZ8	gi|524891741|ref|XP_005102403.1|	3	11.284	3	3	35.73	1DB7,
HACG01033646	A0A0B7AIB0	gi|524891741|ref|XP_005102403.1|	5	17.0732	5	7	116.787	1DA7,1DB7,
HACG01019638	A0A0B6ZD98	gi|524891896|ref|XP_005102480.1|	1	44.9612	6	10	163.81	1DB11,
HACG01019637	A0A0B6ZDK6	gi|524891896|ref|XP_005102480.1|	5	58.1395	8	31	499.017	1DA10,1DA11,1DA12,1DB10,1DB11,1DB12,1DB13,
HACG01029280	A0A0B7A839	gi|524891914|ref|XP_005102489.1|	7	39.011	7	12	59.3167	1DB9,1DB10,
HACG01024549	A0A0B6ZRZ1	gi|524891938|ref|XP_005102501.1|	4	28.2051	4	5	72.43	1DA8,1DB8,
HACG01037005	A0A0B7AVH3	gi|524892029|ref|XP_005102546.1|	3	6.18847	3	3	89.9067	1DB4,
HACG01020148	A0A0B6ZER9	gi|524892053|ref|XP_005102558.1|	3	28.75	3	3	77.64	1DB9,1DB10,
HACG01011704	A0A0B6YQK6	gi|524892070|ref|XP_005102566.1|	2	27.2727	2	2	96.63	1DB5,
HACG01024426	A0A0B6ZTW4	gi|524892143|ref|XP_005102602.1|	3	7.01031	3	5	101	1DB4,1DB5,
HACG01049671	A0A0B7BW09	gi|524892173|ref|XP_005102616.1|	14	49.3464	14	40	635.33	1DA6,1DA7,1DA8,1DB7,1DB8,
HACG01030000	A0A0B7AA72	gi|524892179|ref|XP_005102619.1|	12	27.0175	12	20	290.88	1DA4,1DB4,1DB1,
HACG01036594	A0A0B7AR31	gi|524892201|ref|XP_005102630.1|	3	49.0566	4	4	57.38	1DB3,
HACG01036592	A0A0B7ARJ2	gi|524892201|ref|XP_005102630.1|	14	20.2343	15	16	310.99	1DB3,
HACG01016971	A0A0B6Z7B9	gi|524892281|ref|XP_005102670.1|	2	4.44444	4	10	359.85	1DA5,1DA6,1DB1,1DB3,1DB4,1DB5,
HACG01035743	A0A0B7ANJ2	gi|524892285|ref|XP_005102672.1|	12	33.8877	13	27	665.514	1DA4,1DA5,1DB6,1DB5,
HACG01023160	A0A0B6ZQN1	gi|524892329|ref|XP_005102693.1|	20	33.725	20	24	564.32	1DA3,1DB3,
HACG01032064	A0A0B7AD66	gi|524892341|ref|XP_005102699.1|	14	72.3735	17	206	3139.64	1DA2,1DA3,1DA4,1DA5,1DA6,1DA7,1DA8,1DB1,1DB4,1DB5,1DB6,1DB7,1DB8,1DB9,1DB3,
HACG01036457	A0A0B7ARV6	gi|524892590|ref|XP_005102822.1|	3	13.615	5	10	200.75	1DA5,1DA7,1DB1,1DB5,
HACG01029299	A0A0B7A5C2	gi|524892590|ref|XP_005102822.1|	4	19.0883	6	10	160.26	1DA4,1DA11,1DB2,1DB4,1DB5,1DB6,
HACG01003478	A0A0B6Y2K2	gi|524892640|ref|XP_005102846.1|	8	59.0278	10	37	933.835	1DA11,1DB11,1DB12,1DB13,
HACG01049894	A0A0B7BU58	gi|524892640|ref|XP_005102846.1|	8	80	10	43	928.626	1DA11,1DB11,1DB12,1DB13,
HACG01034278	A0A0B7AJW7	gi|524892644|ref|XP_005102848.1|	9	62.4	9	52	1178.76	1DA1,1DA2,1DA3,1DA4,1DA5,1DA6,1DA7,1DA8,1DB1,1DB2,1DB4,1DB5,1DB6,1DB7,
HACG01019966	A0A0B6ZG54	gi|524892768|ref|XP_005102909.1|	4	23.8889	4	5	99.77	1DA9,1DB10,
HACG01031475	A0A0B7AEG1	gi|524892819|ref|XP_005102934.1|	12	26.5018	12	32	678.749	1DA3,1DA4,1DB1,1DB3,1DB4,1DB2,
HACG01021652	A0A0B6ZJG4	gi|524892866|ref|XP_005102957.1|	2	11.2179	2	2	39.98	1DB7,
HACG01017309	A0A0B6Z6A5	gi|524892872|ref|XP_005102960.1|	4	18.0685	4	9	154.236	1DA7,1DB7,
HACG01026435	A0A0B6ZZZ6	gi|524892924|ref|XP_005102985.1|	18	57.5406	18	186	4977.21	1DA1,1DA2,1DA3,1DA4,1DA5,1DA6,1DB1,1DB4,1DB5,1DB6,1DB7,1DA9,1DA10,1DA11,1DA12,1DB2,1DB3,1DA7,1DA8,1DB12,1DB8,
HACG01022483	A0A0B6ZLF6	gi|524892967|ref|XP_005103005.1|	10	65.0246	10	172	2716.94	1DA2,1DA3,1DA4,1DA5,1DA6,1DA7,1DA8,1DA9,1DA10,1DA11,1DA12,1DB1,1DB2,1DB3,1DB4,1DB6,1DB7,1DB8,1DB9,1DB10,1DB11,1DB12,1DB13,1DB5,
HACG01049785	A0A0B7BWU5	gi|524892979|ref|XP_005103011.1|	2	33.6066	2	2	33.55	1DB8,
HACG01021133	A0A0B6ZHD5	gi|524893065|ref|XP_005103053.1|	2	16.129	2	2	79.52	1DB4,1DB5,
HACG01005599	A0A0B6Y8K9	gi|524893085|ref|XP_005103063.1|	3	14.786	3	4	96.7	1DA7,1DB8,
HACG01031847	A0A0B7ADI2	gi|524893098|ref|XP_005103069.1|	3	21.9512	3	20	284.38	1DA8,1DA9,1DA10,1DB10,1DB13,1DA12,1DB11,1DB12,
HACG01041843	A0A0B7B6P2	gi|524893098|ref|XP_005103069.1|	10	82.9114	10	65	1259.8	1DA7,1DA8,1DA10,1DB1,1DB9,1DB10,1DB11,1DB12,1DB13,1DA9,1DA12,1DB8,
HACG01015466	A0A0B6Z316	gi|524893160|ref|XP_005103100.1|	2	16.9014	3	7	57.2357	1DB9,
HACG01002722	A0A0B6XZV1	gi|524893168|ref|XP_005103104.1|	2	32.8767	2	3	153.603	1DA12,1DB12,
HACG01036513	A0A0B7AR70	gi|524893177|ref|XP_005103108.1|	2	3.72208	2	5	123.37	1DA1,1DA2,1DA3,1DB2,
HACG01038943	A0A0B7B0H6	gi|524893281|ref|XP_005103158.1|	6	13.5849	6	9	115.757	1DA4,1DB5,
HACG01038983	A0A0B7AYI7	gi|524893352|ref|XP_005103192.1|	6	25.3731	6	14	378.276	1DA8,1DB9,1DB8,
HACG01028509	A0A0B7A359	gi|524893405|ref|XP_005103218.1|	5	19.1638	5	5	105.99	1DB8,
HACG01020335	A0A0B6ZHG3	gi|524893468|ref|XP_005103247.1|	7	68.2635	7	12	197.58	1DA9,1DB10,1DB9,
HACG01041353	A0A0B7B5A3	gi|524893513|ref|XP_005103269.1|	3	5.17529	3	3	73.2067	1DB3,
HACG01041351	A0A0B7B7C1	gi|524893513|ref|XP_005103269.1|	6	22.6636	6	8	100.935	1DA3,1DB3,
HACG01046192	A0A0B7BJJ3	gi|524893558|ref|XP_005103288.1|	3	9.60265	3	3	73.09	1DB7,
HACG01035185	A0A0B7AQ67	gi|524893572|ref|XP_005103295.1|	4	10.3614	4	9	147.022	1DA4,1DA5,1DB4,1DB5,1DB6,
HACG01008570	A0A0B6YIX1	gi|524893612|ref|XP_005103315.1|	7	41.7062	7	22	363.135	1DA7,1DA8,1DB8,1DB9,1DB1,1DB7,
HACG01041889	A0A0B7B5X0	gi|524893673|ref|XP_005103345.1|	9	18.2274	9	9	219.931	1DA4,1DB4,
HACG01006397	A0A0B6YA88	gi|524893715|ref|XP_005103366.1|	7	34.0314	7	23	191.97	1DA7,1DB9,1DA8,1DB10,
HACG01028084	A0A0B7A229	gi|524893741|ref|XP_005103379.1|	3	29.932	4	9	111.576	1DA10,1DB13,1DB11,
HACG01029120	A0A0B7A7P3	gi|524893741|ref|XP_005103379.1|	6	46.7456	7	24	291.855	1DA11,1DB11,1DB12,1DB13,
HACG01041908	A0A0B7B6X3	gi|524893765|ref|XP_005103391.1|	4	11.1317	4	5	146.36	1DA4,1DA11,
HACG01041909	A0A0B7B5Z0	gi|524893765|ref|XP_005103391.1|	20	41.7293	20	24	402.54	1DB4,
HACG01045278	A0A0B7BGP4	gi|524893771|ref|XP_005103394.1|	2	6.88406	2	2	41.86	1DA4,1DB4,
HACG01045276	A0A0B7BGZ2	gi|524893771|ref|XP_005103394.1|	5	25.8555	5	9	270.078	1DA3,1DA4,1DB4,1DB5,
HACG01026942	A0A0B6ZZP8	gi|524893793|ref|XP_005103405.1|	11	30.4587	11	27	648.553	1DA3,1DA4,1DA5,1DA7,1DB4,1DB5,1DB1,1DB3,
HACG01022640	A0A0B6ZP81	gi|524893797|ref|XP_005103407.1|	2	2.87611	2	2	37.25	1DB5,
HACG01037279	A0A0B7ASY0	gi|524893900|ref|XP_005103458.1|	7	29.3785	13	26	355.055	1DA5,1DB4,1DB5,
HACG01037278	A0A0B7ATF4	gi|524893900|ref|XP_005103458.1|	12	33.0206	15	41	702.95	1DA3,1DA4,1DB3,1DB5,1DB1,1DB4,
HACG01017147	A0A0B6Z6M0	gi|524893965|ref|XP_005103490.1|	2	12.406	2	4	203.75	1DA6,1DB6,1DB7,
HACG01041867	A0A0B7B762	gi|524894013|ref|XP_005103514.1|	2	20.5882	6	9	136.861	1DA5,1DB5,
HACG01041866	A0A0B7B8S4	gi|524894013|ref|XP_005103514.1|	14	43.3409	16	50	904.05	1DA3,1DA4,1DA12,1DB1,1DB4,1DB5,1DB6,1DA5,1DB3,1DA6,
HACG01033674	A0A0B7AHR9	gi|524894026|ref|XP_005103520.1|	2	6.37813	2	3	113.863	1DB6,
HACG01030757	A0A0B7AAC1	gi|524894028|ref|XP_005103521.1|	3	9.78887	3	4	99.5	1DB1,1DB5,
HACG01030773	A0A0B7AA30	gi|524894126|ref|XP_005103566.1|	2	9.92063	2	2	113.85	1DB9,
HACG01040312	A0A0B7B2T2	gi|524894261|ref|XP_005103632.1|	1	2.53593	3	6	40.5367	1DB1,1DB2,
HACG01040079	A0A0B7B0U6	gi|524894261|ref|XP_005103632.1|	7	9.82567	9	30	355.293	1DA1,1DA2,1DB2,1DB1,
HACG01033746	A0A0B7AKS4	gi|524894442|ref|XP_005103718.1|	4	33.913	4	6	148.303	1DA6,1DB6,
HACG01028425	A0A0B7A5N0	gi|524894456|ref|XP_005103725.1|	2	11.5	2	2	44.21	1DB8,
HACG01022650	A0A0B6ZP90	gi|524894498|ref|XP_005103746.1|	3	13.2159	3	3	41.6267	1DB9,
HACG01019597	A0A0B6ZDH2	gi|524894502|ref|XP_005103748.1|	30	56.5744	30	227	5014.4	1DA1,1DA2,1DA3,1DA4,1DA5,1DA8,1DB1,1DB4,1DB5,1DA9,1DB2,1DB3,1DA6,1DA7,1DB7,1DB6,
HACG01034593	A0A0B7AKU8	gi|524894544|ref|XP_005103769.1|	8	38.1166	8	16	130.2	1DA8,1DB8,
HACG01028160	A0A0B7A4Y3	gi|524894602|ref|XP_005103797.1|	12	22.5758	12	14	306.279	1DA4,1DB4,
HACG01033587	A0A0B7AIR7	gi|524894608|ref|XP_005103800.1|	20	36.3349	20	27	390.591	1DA4,1DB4,
HACG01035365	A0A0B7AQM9	gi|524894650|ref|XP_005103820.1|	5	17.7852	5	6	176.003	1DA7,1DB7,
HACG01028511	A0A0B7A5S0	gi|524894778|ref|XP_005103881.1|	2	3.76569	2	2	39.42	1DB6,
HACG01026277	A0A0B6ZXS1	gi|524894780|ref|XP_005103882.1|	12	28.442	12	27	493.23	1DA7,1DB7,1DB8,1DB11,1DB4,
HACG01041666	A0A0B7B8B4	gi|524894785|ref|XP_005103884.1|	3	3.89755	3	3	63.7733	1DB3,
HACG01032953	A0A0B7AGA3	gi|524894818|ref|XP_005103900.1|	1	22.4852	2	8	71.385	1DB10,1DB12,1DB13,
HACG01035798	A0A0B7AP93	gi|524894818|ref|XP_005103900.1|	7	33.1361	7	33	284.804	1DA9,1DB1,1DB9,1DB10,1DB11,
HACG01033816	A0A0B7AIL9	gi|524894858|ref|XP_005103920.1|	1	6.90377	3	3	60.64	1DB4,
HACG01033818	A0A0B7AIM3	gi|524894862|ref|XP_005103922.1|	3	12.9283	5	7	106.433	1DA4,1DB4,1DB3,
HACG01022127	A0A0B6ZKT0	gi|524894895|ref|XP_005103937.1|	2	24.3421	3	8	154.44	1DA10,1DB11,1DB12,1DB13,1DA11,
HACG01035819	A0A0B7ANQ4	gi|524894895|ref|XP_005103937.1|	2	32.4324	3	12	314.233	1DA7,1DA9,1DA10,1DA11,1DA12,1DB11,1DB12,1DB13,
HACG01039416	A0A0B7AYX4	gi|524894915|ref|XP_005103947.1|	4	18.1132	4	5	103.99	1DB7,1DB8,
HACG01005561	A0A0B6Y9C9	gi|524894931|ref|XP_005103955.1|	5	26.0638	5	7	65.6357	1DA8,1DB1,1DB9,
HACG01033536	A0A0B7AK59	gi|524894939|ref|XP_005103959.1|	2	13.0719	2	3	63.3933	1DB13,
HACG01013044	A0A0B6YUH0	gi|524894976|ref|XP_005103977.1|	5	51.5789	5	9	97.1656	1DA11,1DA12,1DB11,1DB12,1DB5,
HACG01049715	A0A0B7BWN9	gi|524895031|ref|XP_005104004.1|	11	26.6932	11	33	659.01	1DA2,1DA3,1DA4,1DA5,1DB1,1DB3,1DB4,1DB5,
HACG01012984	A0A0B6YWK5	gi|524895123|ref|XP_005104049.1|	2	27	6	9	164.254	1DA8,1DB9,
HACG01047290	A0A0B7BPR3	gi|524895123|ref|XP_005104049.1|	4	38.3838	9	12	185.89	1DB9,
HACG01002012	A0A0B6XXU8	gi|524895342|ref|XP_005104156.1|	9	30.3763	9	13	238.591	1DA6,1DB6,1DB1,1DB7,
HACG01037260	A0A0B7AVS7	gi|524895398|ref|XP_005104182.1|	3	9.29648	3	3	60.25	1DB6,
HACG01047073	A0A0B7BKW0	gi|524895406|ref|XP_005104186.1|	10	7.67888	10	17	267.695	1DA3,1DB2,1DB3,1DB4,
HACG01024673	A0A0B6ZSM7	gi|524895469|ref|XP_005104217.1|	6	25.4417	6	12	212.05	1DA7,1DB7,1DB8,
HACG01047720	A0A0B7BR00	gi|524895637|ref|XP_005104300.1|	3	11.7845	3	8	134.54	1DA8,1DB7,1DB8,
HACG01031276	A0A0B7ADM8	gi|524895639|ref|XP_005104301.1|	6	23.4483	6	14	251.87	1DA7,1DB7,1DB8,
HACG01049108	A0A0B7BSN9	gi|524895689|ref|XP_005104326.1|	2	14.7887	2	4	37.42	1DB1,1DB2,1DB3,
HACG01028273	A0A0B7A2V3	gi|524895699|ref|XP_005104331.1|	10	22.2958	10	17	165.517	1DA5,1DB5,1DB6,
HACG01042325	A0A0B7BAQ7	gi|524895745|ref|XP_005104354.1|	7	57.3441	60	516	14983.1	1DA1,1DA2,1DA3,1DA4,1DB4,1DB5,1DB6,1DB9,1DB10,1DA8,1DA7,
HACG01031077	A0A0B7ABE1	gi|524895745|ref|XP_005104354.1|	7	75.0693	81	648	16063.1	1DA1,1DA2,1DA3,1DA9,1DB1,1DB2,1DB4,1DB10,1DB12,1DB13,1DA6,1DA8,1DB7,1DB9,1DB5,1DA7,1DA10,1DA11,
HACG01031079	A0A0B7AAF6	gi|524895745|ref|XP_005104354.1|	7	76.6342	81	605	14610.5	1DA1,1DA4,1DB1,1DB2,1DB3,1DB4,1DB11,1DA5,1DB6,1DA7,
HACG01042327	A0A0B7B8F3	gi|524895745|ref|XP_005104354.1|	9	73.2478	108	591	13658.7	1DB1,1DB2,1DB3,
HACG01031072	A0A0B7ABD5	gi|524895745|ref|XP_005104354.1|	26	63.253	35	514	13237.4	1DA1,1DA2,1DA3,1DA4,1DA5,1DA6,1DB1,1DB2,1DB3,1DB4,1DA7,1DA9,1DA10,1DA11,1DA12,1DA8,1DB7,1DB8,1DB9,1DB10,1DB11,1DB12,1DB5,1DB6,
HACG01025290	A0A0B6ZWK3	gi|524895763|ref|XP_005104363.1|	3	16.1137	3	3	58.23	1DB8,
HACG01002049	A0A0B6XYD5	gi|524895775|ref|XP_005104369.1|	2	9.20635	2	3	72.2	1DA6,1DB6,
HACG01026835	A0A0B7A165	gi|524895893|ref|XP_005104427.1|	11	21.5434	11	14	284.196	1DA4,1DB4,
HACG01011237	A0A0B6YPN0	gi|524895899|ref|XP_005104430.1|	2	17.3077	2	7	114.946	1DB1,1DB5,1DB6,1DB7,1DB8,
HACG01039962	A0A0B7B1D0	gi|524895953|ref|XP_005104456.1|	10	13.0268	10	13	212.782	1DA2,1DB1,1DB2,
HACG01042685	A0A0B7B8A8	gi|524895953|ref|XP_005104456.1|	15	14.5225	15	22	293.105	1DA2,1DB1,1DB2,
HACG01005633	A0A0B6Y8Q9	gi|524896057|ref|XP_005104507.1|	6	37.8723	6	7	117.137	1DA8,1DB8,
HACG01041265	A0A0B7B7P0	gi|524896095|ref|XP_005104525.1|	2	13.3028	2	3	56.99	1DB9,1DB10,
HACG01030313	A0A0B7A8S4	gi|524896189|ref|XP_005104572.1|	3	12.9584	4	4	82.34	1DB5,
HACG01030311	A0A0B7AAX2	gi|524896189|ref|XP_005104572.1|	6	28.8835	7	8	141.72	1DA5,1DB5,
HACG01042421	A0A0B7B8E6	gi|524896213|ref|XP_005104584.1|	5	4.46602	5	6	207.743	1DB1,1DB2,
HACG01029026	A0A0B7A7B2	gi|524896250|ref|XP_005104602.1|	3	14.1343	3	4	139.06	1DA7,1DB7,
HACG01039089	A0A0B7AY89	gi|524896250|ref|XP_005104602.1|	16	54.417	16	44	567.362	1DA6,1DA7,1DB7,1DB8,1DA8,1DB1,
HACG01021276	A0A0B6ZJU8	gi|524896371|ref|XP_005104660.1|	2	8.90688	2	3	62.17	1DA8,1DB8,
HACG01046673	A0A0B7BKS0	gi|524896407|ref|XP_005104678.1|	6	36.129	6	11	219.664	1DA10,1DB11,1DB12,
HACG01029795	A0A0B7A9K1	gi|524896457|ref|XP_005104703.1|	7	35	7	32	566.844	1DA6,1DA7,1DA8,1DA9,1DA11,1DB9,1DB10,1DB11,
HACG01002452	A0A0B6XZ23	gi|524896476|ref|XP_005104712.1|	2	16.0305	2	4	61.16	1DB10,1DB13,
HACG01025121	A0A0B6ZVZ8	gi|524896519|ref|XP_005104733.1|	14	62.7451	18	100	1103.16	1DA5,1DA7,1DA8,1DB1,1DB2,1DB6,1DB7,1DB9,1DA6,1DB8,
HACG01022642	A0A0B6ZM97	gi|524896519|ref|XP_005104733.1|	20	74.5098	23	95	1222.41	1DA7,1DA8,1DB9,1DA12,1DB8,
HACG01033017	A0A0B7AGY2	gi|524896554|ref|XP_005104750.1|	2	16.1654	2	5	117.68	1DA1,1DA2,1DA3,1DB2,
HACG01049383	A0A0B7BSN5	gi|524896597|ref|XP_005104771.1|	3	19.7531	3	4	80.27	1DA8,1DB9,
HACG01037939	A0A0B7AY18	gi|524896638|ref|XP_005104791.1|	20	41.3947	20	61	1293.66	1DA3,1DA4,1DB4,1DB1,1DB2,1DB3,1DB5,
HACG01021670	A0A0B6ZLD3	gi|524896689|ref|XP_005104816.1|	4	20.5263	4	4	37.81	1DB9,
HACG01002165	A0A0B6Y0J4	gi|524896746|ref|XP_005104844.1|	8	55.7971	8	21	105.618	1DA9,1DA10,1DA11,1DB10,1DB11,1DB12,1DB13,1DB1,
HACG01047822	A0A0B7BP83	gi|524896814|ref|XP_005104878.1|	1	39.6981	78	88	1633.42	1DB2,
HACG01005986	A0A0B6YAK7	gi|524896814|ref|XP_005104878.1|	2	15.3392	3	4	76.68	1DB4,
HACG01047844	A0A0B7BN40	gi|524896814|ref|XP_005104878.1|	4	14.5933	5	9	171.227	1DB1,1DB2,
HACG01021124	A0A0B6ZHD0	gi|524896814|ref|XP_005104878.1|	5	29.8701	5	8	196.08	1DA4,1DB4,1DB3,
HACG01047831	A0A0B7BQP4	gi|524896814|ref|XP_005104878.1|	11	20.9106	21	40	767.595	1DA1,1DA2,1DB1,1DB2,
HACG01047823	A0A0B7BN15	gi|524896814|ref|XP_005104878.1|	26	27.0111	26	73	1752.43	1DA1,1DA3,1DA2,1DB3,1DA4,1DA6,1DB6,1DB7,
HACG01035846	A0A0B7ARU7	gi|524896814|ref|XP_005104878.1|	31	62.0968	32	118	2213.78	1DA1,1DA2,1DA3,1DA4,1DB1,1DB2,1DB3,1DB4,1DB6,
HACG01047828	A0A0B7BP02	gi|524896814|ref|XP_005104878.1|	43	38.3831	44	92	1511.17	1DB1,1DB2,
HACG01047813	A0A0B7BNY8	gi|524896814|ref|XP_005104878.1|	69	49.6121	101	292	6075.97	1DA1,1DA2,1DA3,1DB1,1DB2,1DA9,1DB3,1DA4,1DA7,1DB7,1DB8,
HACG01017493	A0A0B6Z757	gi|524896874|ref|XP_005104908.1|	10	50.8	10	29	215.054	1DA9,1DB9,1DB10,
HACG01006348	A0A0B6YAT1	gi|524896949|ref|XP_005104944.1|	5	32.7684	5	5	58.38	1DB10,
HACG01020834	A0A0B6ZGF9	gi|524896989|ref|XP_005104963.1|	3	18.2692	3	4	64.12	1DB13,
HACG01045882	A0A0B7BIN0	gi|524897050|ref|XP_005104992.1|	2	7.80911	2	3	147.327	1DA4,1DB4,1DB3,
HACG01023247	A0A0B6ZP02	gi|524897076|ref|XP_005105005.1|	2	26.3736	2	3	112.77	1DA12,1DB12,
HACG01044729	A0A0B7BE84	gi|524897390|ref|XP_005105156.1|	7	81.4286	7	23	215.21	1DA12,1DB11,1DB12,
HACG01025918	A0A0B6ZW02	gi|524897447|ref|XP_005105184.1|	2	8.62069	2	2	48.47	1DB7,
HACG01018715	A0A0B6ZCX9	gi|524897481|ref|XP_005105201.1|	2	11.4035	2	2	54.76	1DB7,
HACG01021235	A0A0B6ZK25	gi|524897639|ref|XP_005105279.1|	9	38.3929	9	15	184.5	1DA8,1DB8,
HACG01030771	A0A0B7ACA3	gi|524897671|ref|XP_005105294.1|	15	32.9137	15	56	1425.9	1DA1,1DB5,1DA2,1DA3,1DA5,1DB1,1DB2,1DB3,1DB4,1DA4,
HACG01011633	A0A0B6YQE5	gi|524897756|ref|XP_005105335.1|	2	13.4078	2	2	45.11	1DB10,
HACG01036937	A0A0B7AT59	gi|524897909|ref|XP_005105409.1|	4	18.75	4	5	249.44	1DB1,1DB2,
HACG01031689	A0A0B7AC16	gi|524897931|ref|XP_005105420.1|	3	5.84518	3	3	50.1733	1DB4,
HACG01025352	A0A0B6ZV27	gi|524897983|ref|XP_005105446.1|	5	25.8427	6	14	254.417	1DA4,1DB4,1DB5,1DB1,
HACG01035352	A0A0B7ANL7	gi|524897983|ref|XP_005105446.1|	11	29.5113	12	24	427.823	1DA4,1DA5,1DB5,1DB3,1DB4,
HACG01022806	A0A0B6ZP87	gi|524897999|ref|XP_005105454.1|	13	45.3297	14	43	1483.7	1DA5,1DA6,1DA7,1DA8,1DB5,1DB6,1DB7,1DB3,1DB4,
HACG01040386	A0A0B7B4N1	gi|524897999|ref|XP_005105454.1|	15	53.5519	16	63	1579.93	1DA3,1DA4,1DA5,1DA6,1DA7,1DA8,1DB1,1DB5,1DB6,1DB4,1DB2,1DB3,
HACG01026591	A0A0B7A055	gi|524898060|ref|XP_005105484.1|	10	27.0777	10	16	376.413	1DA5,1DB5,1DB6,
HACG01019088	A0A0B6ZBX0	gi|524898101|ref|XP_005105504.1|	3	10.1449	3	3	79.9633	1DB7,
HACG01042308	A0A0B7B822	gi|524898135|ref|XP_005105521.1|	3	2.23565	3	4	93.61	1DB1,1DB2,
HACG01043321	A0A0B7BAW9	gi|524898175|ref|XP_005105540.1|	3	6.72414	3	6	178.777	1DB1,1DB2,1DB3,1DB4,
HACG01033098	A0A0B7AGS2	gi|524898203|ref|XP_005105554.1|	10	15.4167	10	10	139.66	1DB2,
HACG01044757	A0A0B7BFG3	gi|524898231|ref|XP_005105567.1|	11	31.1653	11	16	291.44	1DA6,1DB6,
HACG01015582	A0A0B6Z244	gi|524898259|ref|XP_005105581.1|	13	50.8929	13	60	667.21	1DA4,1DA7,1DA8,1DA11,1DB8,1DA6,1DB1,1DB9,1DB7,
HACG01037510	A0A0B7AWT2	gi|524898265|ref|XP_005105584.1|	3	18.5606	3	4	111.98	1DA8,1DB8,
HACG01024212	A0A0B6ZRS8	gi|524898272|ref|XP_005105587.1|	3	24.2424	3	11	177.351	1DB11,1DB13,1DB12,
HACG01037655	A0A0B7AXA4	gi|524898324|ref|XP_005105612.1|	11	31.0277	11	12	213.92	1DA5,1DB5,
HACG01020308	A0A0B6ZF52	gi|524898422|ref|XP_005105660.1|	2	2.49187	2	2	55.13	1DB3,
HACG01036719	A0A0B7ARC3	gi|524898449|ref|XP_005105673.1|	9	48.5356	9	27	312.876	1DA7,1DA8,1DB9,1DB8,
HACG01026977	A0A0B7A1L0	gi|524898531|ref|XP_005105713.1|	6	28.9377	7	15	337.61	1DA8,1DB8,1DB9,
HACG01017455	A0A0B6Z9A8	gi|524898535|ref|XP_005105715.1|	7	35.2941	8	11	133.585	1DA8,1DB8,
HACG01021796	A0A0B6ZLB9	gi|524898539|ref|XP_005105717.1|	3	14.2857	3	5	90.86	1DA7,1DB8,1DB7,
HACG01041165	A0A0B7B7G4	gi|524898553|ref|XP_005105724.1|	7	10.2362	7	12	323.343	1DA1,1DA2,1DA3,1DA4,1DB2,1DB3,
HACG01022987	A0A0B6ZN98	gi|524898581|ref|XP_005105738.1|	2	10.2564	2	2	60.8	1DB3,
HACG01029000	A0A0B7A7B1	gi|524898670|ref|XP_005105781.1|	4	10.8247	4	5	77.48	1DA5,1DB5,
HACG01019803	A0A0B6ZDP2	gi|524898674|ref|XP_005105783.1|	3	15.2284	3	4	72.09	1DA9,1DB10,
HACG01022544	A0A0B6ZL98	gi|524898725|ref|XP_005105808.1|	4	22.7723	4	4	56.43	1DB9,
HACG01003486	A0A0B6Y3C5	gi|524898743|ref|XP_005105817.1|	2	17.6471	2	2	53.55	1DB10,
HACG01031411	A0A0B7ADZ4	gi|524898757|ref|XP_005105824.1|	5	13.9293	5	5	102.27	1DB5,
HACG01049532	A0A0B7BU04	gi|524898763|ref|XP_005105827.1|	3	13.7255	3	3	56.4433	1DB8,
HACG01023150	A0A0B6ZQM5	gi|524898799|ref|XP_005105845.1|	2	1.82482	2	2	50.61	1DB2,
HACG01045773	A0A0B7BI62	gi|524898799|ref|XP_005105845.1|	17	13.3293	17	35	995.717	1DA1,1DA2,1DB1,1DB2,1DB3,1DB7,
HACG01010163	A0A0B6YLE0	gi|524898815|ref|XP_005105852.1|	2	34.2466	2	2	49.44	1DB11,1DB12,
HACG01026786	A0A0B7A0K2	gi|524898815|ref|XP_005105852.1|	3	20.7547	3	8	102.06	1DA11,1DB11,1DB12,
HACG01039691	A0A0B7B2Q2	gi|524898859|ref|XP_005105873.1|	6	15.0459	6	12	131.51	1DA7,1DA8,1DB8,1DB13,
HACG01002148	A0A0B6XYU0	gi|524898902|ref|XP_005105894.1|	4	42.7419	4	9	80.7356	1DA10,1DB10,1DB13,
HACG01036751	A0A0B7AUC3	gi|524898960|ref|XP_005105922.1|	6	17.5799	6	8	207.22	1DA6,1DB6,
HACG01036360	A0A0B7ATI7	gi|524899002|ref|XP_005105942.1|	5	32.0158	11	20	496.34	1DA5,1DB1,1DB4,1DB5,
HACG01027450	A0A0B7A2X2	gi|524899002|ref|XP_005105942.1|	6	37.6404	12	20	400.97	1DB4,1DB5,
HACG01027449	A0A0B7A076	gi|524899004|ref|XP_005105943.1|	1	15.3005	3	13	446.362	1DA1,1DA2,1DA3,1DA4,1DA5,1DB1,1DB2,1DB3,
HACG01018677	A0A0B6ZAW0	gi|524899012|ref|XP_005105947.1|	3	12.6126	3	4	92.44	1DB7,1DB8,
HACG01023633	A0A0B6ZPN1	gi|524899018|ref|XP_005105950.1|	2	10.5042	2	2	64.84	1DB7,
HACG01015572	A0A0B6Z234	gi|524899021|ref|XP_005105951.1|	3	16.8269	3	8	184.645	1DA1,1DA2,1DB2,1DB1,
HACG01040918	A0A0B7B407	gi|524899021|ref|XP_005105951.1|	6	21.659	6	13	139.696	1DA1,1DB2,1DB3,1DB4,
HACG01040915	A0A0B7B6M4	gi|524899023|ref|XP_005105952.1|	3	22.3256	3	40	1669.11	1DA1,1DA2,1DA3,1DA4,1DB1,1DB2,1DB3,1DB4,1DB5,1DB7,
HACG01013070	A0A0B6YWX4	gi|524899023|ref|XP_005105952.1|	5	25.6098	5	9	181.584	1DA1,1DB2,1DB1,1DB3,
HACG01019466	A0A0B6ZEP8	gi|524899091|ref|XP_005105986.1|	6	53.3898	6	13	150.735	1DA11,1DB11,1DB12,
HACG01002003	A0A0B6XYD6	gi|524899180|ref|XP_005106028.1|	8	28.5036	8	15	370.787	1DA5,1DB5,
HACG01005782	A0A0B6Y8H9	gi|524899361|ref|XP_005106113.1|	7	21.2632	7	10	184.47	1DA5,1DB5,1DB6,
HACG01040305	A0A0B7B4X4	gi|524899369|ref|XP_005106117.1|	4	13.7441	4	5	208.39	1DA5,1DB5,
HACG01029880	A0A0B7A9S7	gi|524899489|ref|XP_005106175.1|	6	20.2346	6	8	144.85	1DB7,
HACG01038966	A0A0B7B0J9	gi|524899511|ref|XP_005106186.1|	3	69.9387	10	10	98.05	1DB5,
HACG01020090	A0A0B6ZGY4	gi|524899582|ref|XP_005106220.1|	10	45.3608	10	110	2701.28	1DA1,1DA3,1DA4,1DA5,1DA6,1DA7,1DA8,1DA9,1DB1,1DB6,1DB7,1DB8,1DB9,1DB5,
HACG01013156	A0A0B6YWA7	gi|524899675|ref|XP_005106266.1|	3	11.6608	3	3	37.6967	1DB8,
HACG01036427	A0A0B7ART3	gi|524899675|ref|XP_005106266.1|	3	16.7883	3	3	57.3	1DB7,
HACG01036430	A0A0B7ATQ6	gi|524899675|ref|XP_005106266.1|	6	23.913	6	13	295.818	1DA7,1DB7,
HACG01039271	A0A0B7B1F4	gi|524899677|ref|XP_005106267.1|	2	31.3253	2	9	139.904	1DA10,1DA11,1DA12,1DB11,1DB12,1DB13,
HACG01031174	A0A0B7AAN1	gi|524899715|ref|XP_005106286.1|	2	5.46318	2	2	30.22	1DB6,
HACG01039439	A0A0B7AZ02	gi|524899735|ref|XP_005106295.1|	4	14.8649	4	6	132.763	1DA7,1DB7,1DB8,
HACG01032598	A0A0B7AFE4	gi|524899892|ref|XP_005106372.1|	2	12.8866	2	6	149.603	1DA10,1DA11,1DB11,
HACG01032600	A0A0B7AHV9	gi|524899892|ref|XP_005106372.1|	3	21.0256	3	3	46.2067	1DB13,
HACG01042636	A0A0B7BB55	gi|524900084|ref|XP_005106466.1|	9	30.1587	9	10	142.3	1DA5,1DB5,1DB4,
HACG01009811	A0A0B6YLL0	gi|524900236|ref|XP_005106539.1|	3	16.6667	3	4	118.92	1DA7,1DB7,
HACG01010980	A0A0B6YQW1	gi|524900256|ref|XP_005106549.1|	2	15.6627	2	3	40.45	1DB8,1DB9,
HACG01019902	A0A0B6ZE91	gi|524900270|ref|XP_005106556.1|	3	32.2581	3	8	144.245	1DA11,1DB13,1DB11,1DB12,
HACG01025080	A0A0B6ZW25	gi|524900316|ref|XP_005106579.1|	2	2.83784	2	2	81.07	1DB4,
HACG01005112	A0A0B6Y6N4	gi|524900332|ref|XP_005106587.1|	2	18	2	3	48.3667	1DB13,
HACG01038058	A0A0B7AVR0	gi|524900353|ref|XP_005106597.1|	3	11.4286	3	4	176.08	1DB5,1DB6,
HACG01044252	A0A0B7BE01	gi|524900380|ref|XP_005106610.1|	5	30.6977	5	24	474.735	1DA8,1DA9,1DB9,1DB10,1DB8,1DB1,
HACG01030816	A0A0B7ACE4	gi|524900386|ref|XP_005106613.1|	2	5.19187	2	2	46.44	1DB5,
HACG01038748	A0A0B7AXT4	gi|524900390|ref|XP_005106615.1|	6	18.5263	7	18	375.32	1DA7,1DB6,1DB5,
HACG01038749	A0A0B7AX99	gi|524900390|ref|XP_005106615.1|	15	37.3134	15	51	1203.74	1DA3,1DA4,1DA6,1DA9,1DA10,1DB1,1DB4,1DB6,1DB7,1DA5,
HACG01031828	A0A0B7AD39	gi|524900516|ref|XP_005106678.1|	5	31.8627	5	9	172.296	1DA8,1DB9,1DB10,1DA9,
HACG01028199	A0A0B7A2B8	gi|524900516|ref|XP_005106678.1|	7	28.2178	7	14	139.087	1DB9,1DB10,
HACG01020505	A0A0B6ZHZ8	gi|524900516|ref|XP_005106678.1|	7	39.1089	8	14	211.786	1DB9,1DB10,
HACG01028200	A0A0B7A527	gi|524900516|ref|XP_005106678.1|	8	28.7129	8	21	222.36	1DA8,1DB10,1DB9,
HACG01037112	A0A0B7ATS2	gi|524900516|ref|XP_005106678.1|	8	42.5	8	25	684.12	1DA8,1DA9,1DB9,1DB10,
HACG01043939	A0A0B7BF43	gi|524900516|ref|XP_005106678.1|	10	58.0488	10	186	2700.96	1DA4,1DA5,1DA6,1DA7,1DA8,1DA9,1DA11,1DA12,1DB1,1DB5,1DB6,1DB7,1DB8,1DB9,1DB10,1DB11,1DB12,1DA10,1DB13,
HACG01017367	A0A0B6Z767	gi|524900538|ref|XP_005106689.1|	3	7.36434	3	4	121.26	1DB4,
HACG01023595	A0A0B6ZRX6	gi|524900555|ref|XP_005106697.1|	2	7.35632	2	2	43.66	1DB5,
HACG01020633	A0A0B6ZG45	gi|524900577|ref|XP_005106708.1|	2	14.1026	2	2	45.02	1DB9,
HACG01049618	A0A0B7BU43	gi|524900673|ref|XP_005106755.1|	15	66.129	15	96	1920.62	1DA3,1DA4,1DA5,1DA7,1DA8,1DA11,1DB8,1DB9,1DA6,1DB1,1DB10,1DA9,
HACG01044800	A0A0B7BHM3	gi|524900699|ref|XP_005106768.1|	10	36.2881	10	19	413.397	1DA4,1DA5,1DA6,1DB5,1DB6,1DB7,
HACG01022994	A0A0B6ZMI4	gi|524900723|ref|XP_005106780.1|	2	6.31808	2	3	81.7567	1DA5,1DB5,
HACG01042407	A0A0B7BAD9	gi|524900809|ref|XP_005106822.1|	5	16.0819	5	7	122.201	1DA4,1DB4,
HACG01024310	A0A0B6ZTT6	gi|524900832|ref|XP_005106833.1|	6	24.2775	10	10	164.9	1DB5,
HACG01031929	A0A0B7ACP6	gi|524900832|ref|XP_005106833.1|	7	31.1741	11	18	403.379	1DA4,1DB4,1DB5,1DA5,1DA6,
HACG01028819	A0A0B7A411	gi|524900911|ref|XP_005106871.1|	2	20.1613	2	3	51.2267	1DA10,1DB13,
HACG01043308	A0A0B7BAV5	gi|524900993|ref|XP_005106911.1|	5	20.0637	5	7	202.414	1DA7,1DB7,
HACG01033531	A0A0B7AK52	gi|524901033|ref|XP_005106931.1|	1	48.2759	2	7	172.834	1DB9,
HACG01034571	A0A0B7AN94	gi|524901281|ref|XP_005107051.1|	1	19.8758	2	2	84.81	1DB10,
HACG01034572	A0A0B7ALK9	gi|524901283|ref|XP_005107052.1|	2	45.9119	5	7	129.444	1DB10,1DB13,
HACG01034573	A0A0B7AKT1	gi|524901283|ref|XP_005107052.1|	6	72.956	8	10	226.29	1DA10,1DB13,
HACG01049507	A0A0B7BTY0	gi|524901357|ref|XP_005107086.1|	4	18.6441	4	11	229.313	1DA9,1DB9,1DB10,
HACG01005630	A0A0B6YAM5	gi|524901394|ref|XP_005107104.1|	2	31.2796	5	7	264.74	1DB7,
HACG01005209	A0A0B6Y7G2	gi|524901394|ref|XP_005107104.1|	3	23.0126	4	10	366.07	1DA7,1DB7,1DB8,
HACG01028959	A0A0B7A757	gi|524901460|ref|XP_005107137.1|	4	23.0126	4	8	138.77	1DA7,1DA8,1DB8,1DB9,
HACG01025264	A0A0B6ZU34	gi|524901464|ref|XP_005107139.1|	1	22.5564	5	6	47.7133	1DB8,
HACG01025262	A0A0B6ZUT6	gi|524901464|ref|XP_005107139.1|	6	37.594	9	13	172.88	1DA7,1DB1,1DB7,1DB8,
HACG01026408	A0A0B6ZXE7	gi|524901519|ref|XP_005107166.1|	2	13.1707	2	2	39.5	1DB9,
HACG01043427	A0A0B7BBM5	gi|524901536|ref|XP_005107174.1|	7	22.1135	9	37	796.839	1DA2,1DA4,1DB1,1DB2,1DB5,1DA11,1DA12,1DB11,1DB12,1DB13,1DB4,1DB6,
HACG01043428	A0A0B7BB74	gi|524901536|ref|XP_005107174.1|	10	27.5194	12	45	877.656	1DA1,1DA2,1DA3,1DB2,1DB5,1DA4,1DA5,1DB6,1DB1,1DA10,1DA11,1DB11,1DB12,1DB13,1DB4,
HACG01025467	A0A0B6ZVF9	gi|524901565|ref|XP_005107188.1|	2	12.6506	2	5	118.62	1DA4,1DB1,1DB2,1DB4,
HACG01021522	A0A0B6ZJ42	gi|524901619|ref|XP_005107215.1|	3	3.99202	3	3	80.2767	1DB2,1DB3,
HACG01033617	A0A0B7AIU1	gi|524901804|ref|XP_005107306.1|	8	73.6111	8	36	814.492	1DA10,1DB1,1DB10,1DB11,1DB13,1DA11,
HACG01033873	A0A0B7AIR1	gi|524901804|ref|XP_005107306.1|	8	70.8333	8	59	1212.52	1DA9,1DA10,1DB9,1DB10,1DB11,1DB12,1DB13,1DB8,
HACG01018827	A0A0B6ZB80	gi|524901877|ref|XP_005107342.1|	2	16.2921	2	2	50.6	1DB13,
HACG01026469	A0A0B6ZXH5	gi|524901897|ref|XP_005107352.1|	11	54.7297	11	28	646.417	1DA6,1DA7,1DB7,1DB8,
HACG01002138	A0A0B6XYT4	gi|524901901|ref|XP_005107354.1|	3	17.6471	3	6	139.13	1DB10,1DB13,
HACG01049626	A0A0B7BVX2	gi|524901909|ref|XP_005107358.1|	11	53.8462	11	30	678.613	1DA7,1DA8,1DB8,1DB9,1DB7,
HACG01030309	A0A0B7A863	gi|524902240|ref|XP_005107439.1|	4	11.4634	4	11	270.444	1DA4,1DB1,1DB4,1DB5,
HACG01008906	A0A0B6YIX8	gi|524902421|ref|XP_005107462.1|	5	39.2638	5	56	1035.44	1DA5,1DA7,1DA8,1DA9,1DA10,1DB1,1DB4,1DB7,1DB9,1DB10,1DB13,1DA11,1DB11,1DB12,
HACG01037555	A0A0B7AWX8	gi|524902423|ref|XP_005107463.1|	4	12.6844	4	8	92.38	1DB4,1DB5,1DB6,
HACG01002365	A0A0B6Y104	gi|524902425|ref|XP_005107464.1|	2	14.7541	3	3	81.6267	1DB7,
HACG01040259	A0A0B7B258	gi|524902427|ref|XP_005107465.1|	6	29.582	7	10	284.03	1DB7,
HACG01047641	A0A0B7BQ86	gi|524902448|ref|XP_005107474.1|	17	47.3856	17	124	2384.82	1DA1,1DA2,1DA12,1DB1,1DB4,1DB5,1DB6,1DB7,1DB8,1DB12,1DA6,1DB2,1DB3,1DB10,1DB11,1DB9,
HACG01034336	A0A0B7AMI2	gi|524902569|ref|XP_005107527.1|	4	14.3813	4	7	74.8971	1DB8,1DB9,
HACG01041869	A0A0B7B5V0	gi|524902626|ref|XP_005107542.1|	5	54.9763	10	25	507.62	1DA7,1DA8,1DB8,1DB9,
HACG01041871	A0A0B7B8S9	gi|524902628|ref|XP_005107543.1|	4	47.8673	9	27	555.19	1DA7,1DA8,1DB8,1DB9,
HACG01020312	A0A0B6ZFH0	gi|524902628|ref|XP_005107543.1|	6	50.4854	6	13	318.917	1DA7,1DA8,1DA9,1DB8,
HACG01030107	A0A0B7A8L0	gi|524902664|ref|XP_005107561.1|	4	11.6041	4	4	64.02	1DB6,
HACG01041646	A0A0B7B897	gi|524902702|ref|XP_005107579.1|	2	9.03427	2	3	99.39	1DB5,
HACG01016116	A0A0B6Z536	gi|524902714|ref|XP_005107585.1|	3	13.5593	3	3	30.6133	1DB8,
HACG01002406	A0A0B6Y0E3	gi|524902755|ref|XP_005107604.1|	6	24.6622	6	9	178.65	1DB1,1DB7,1DB6,
HACG01034858	A0A0B7ALI0	gi|524902826|ref|XP_005107636.1|	5	21.7573	5	15	308.293	1DA8,1DA9,1DB9,1DB10,
HACG01030731	A0A0B7AC67	gi|524902881|ref|XP_005107662.1|	5	33.3333	5	5	85.09	1DB10,
HACG01023652	A0A0B6ZQ67	gi|524902881|ref|XP_005107662.1|	9	45.2055	9	10	113.87	1DB9,
HACG01019617	A0A0B6ZDI9	gi|524902931|ref|XP_005107685.1|	2	10.8014	2	3	125.4	1DB7,
HACG01035354	A0A0B7AME9	gi|524902931|ref|XP_005107685.1|	4	64.3836	4	11	261.276	1DA7,1DB7,1DB6,
HACG01005589	A0A0B6Y8K3	gi|524903041|ref|XP_005107738.1|	3	22.9358	4	13	289.907	1DA4,1DB1,1DB4,1DB5,
HACG01032007	A0A0B7AE20	gi|524903041|ref|XP_005107738.1|	5	38.9978	15	33	637.154	1DA4,1DB4,
HACG01005590	A0A0B6YAK3	gi|524903041|ref|XP_005107738.1|	6	40.327	12	41	779.38	1DA1,1DA3,1DA4,1DB1,1DB2,1DB3,1DB4,1DB5,
HACG01029237	A0A0B7A615	gi|524903184|ref|XP_005107804.1|	2	4.11523	2	2	43.08	1DB5,
HACG01047271	A0A0B7BP49	gi|524903184|ref|XP_005107804.1|	4	7.58427	4	6	74.7933	1DB5,
HACG01046826	A0A0B7BMW1	gi|524903201|ref|XP_005107810.1|	6	33.8403	6	17	551.584	1DA1,1DA2,1DB1,1DB2,
HACG01046828	A0A0B7BL64	gi|524903201|ref|XP_005107810.1|	7	29.409	47	80	2053.26	1DA2,1DA3,1DB3,1DA11,1DB4,
HACG01046825	A0A0B7BNE7	gi|524903201|ref|XP_005107810.1|	45	37.4637	70	164	4118.66	1DA1,1DA2,1DB1,1DB2,1DB3,
HACG01034037	A0A0B7AK12	gi|524903247|ref|XP_005107829.1|	3	12.0192	3	4	86.67	1DB5,
HACG01025292	A0A0B6ZUX0	gi|524903262|ref|XP_005107836.1|	2	7.54717	2	3	63.0733	1DA8,1DB8,
HACG01023019	A0A0B6ZMK9	gi|524903262|ref|XP_005107836.1|	8	31.4815	8	13	120.022	1DA8,1DB8,1DB9,
HACG01030526	A0A0B7A8S7	gi|524903293|ref|XP_005107850.1|	7	22.5071	7	14	227.439	1DA6,1DB7,1DB6,
HACG01047611	A0A0B7BQ67	gi|524903344|ref|XP_005107874.1|	5	21.4912	5	11	168.679	1DA4,1DB4,1DB5,
HACG01034412	A0A0B7AL25	gi|524903367|ref|XP_005107884.1|	9	30.5994	9	20	364.43	1DA4,1DA5,1DA6,1DA7,1DB7,1DB1,1DB5,1DB6,
HACG01006303	A0A0B6YAN8	gi|524903383|ref|XP_005107892.1|	1	61.9048	4	7	174.161	1DB5,
HACG01006302	A0A0B6Y9Z4	gi|524903383|ref|XP_005107892.1|	1	31.6062	5	18	415.548	1DB5,1DB8,
HACG01039642	A0A0B7B0H4	gi|524903383|ref|XP_005107892.1|	27	77.6952	28	362	10496.2	1DA1,1DA2,1DA3,1DA5,1DA7,1DB1,1DB4,1DB5,1DB6,1DA4,1DA6,1DA8,1DA9,1DA10,1DA11,1DB3,1DB7,1DB2,
HACG01035696	A0A0B7ARE2	gi|524903434|ref|XP_005107917.1|	4	70.4545	4	5	82.18	1DA12,1DB12,
HACG01031423	A0A0B7ABY1	gi|524903438|ref|XP_005107919.1|	9	47.0149	9	14	373.471	1DA7,1DA8,1DB8,1DB9,
HACG01033535	A0A0B7AKH2	gi|524903461|ref|XP_005107930.1|	8	47.6636	8	19	326.369	1DA7,1DB8,1DA8,1DB1,1DB7,
HACG01020874	A0A0B6ZGK6	gi|524903522|ref|XP_005107960.1|	14	45.5975	14	75	1603.18	1DA4,1DA5,1DA6,1DA7,1DB1,1DB4,1DB5,1DB6,1DB7,1DB8,1DA8,1DA10,1DA11,
HACG01017102	A0A0B6Z6I5	gi|524903608|ref|XP_005108000.1|	3	15.5556	3	8	131.675	1DB1,1DB2,1DB8,
HACG01044997	A0A0B7BG57	gi|524903676|ref|XP_005108033.1|	5	19.3798	5	7	137.78	1DA2,1DA6,1DB1,1DB6,
HACG01018745	A0A0B6ZD00	gi|524903740|ref|XP_005108064.1|	2	5.23338	2	3	75.88	1DB3,
HACG01043214	A0A0B7B9R8	gi|524903799|ref|XP_005108092.1|	4	8.92256	4	5	110.89	1DB1,1DB4,
HACG01021901	A0A0B6ZLL1	gi|524905586|ref|XP_005108170.1|	2	15.4762	2	4	96.05	1DA10,1DB10,1DB13,
HACG01035242	A0A0B7ANA0	gi|524905668|ref|XP_005108199.1|	2	8.40336	2	4	194.05	1DA1,1DA2,
HACG01024304	A0A0B6ZR93	gi|524905758|ref|XP_005108242.1|	1	38.0952	2	2	65.98	1DB10,
HACG01038891	A0A0B7B0C3	gi|524905758|ref|XP_005108242.1|	4	22.3529	4	7	105.743	1DA9,1DB10,
HACG01006838	A0A0B6YC41	gi|524905947|ref|XP_005108331.1|	3	25.8883	3	6	129.187	1DA8,1DB8,1DB9,
HACG01006507	A0A0B6YAL3	gi|524905977|ref|XP_005108344.1|	2	10.5263	2	2	47.98	1DB9,
HACG01032848	A0A0B7AFZ5	gi|524905999|ref|XP_005108354.1|	3	17.7419	3	7	164.816	1DA4,1DA5,1DB5,1DB10,
HACG01032849	A0A0B7AFB4	gi|524905999|ref|XP_005108354.1|	4	15.0602	4	7	128.731	1DA5,1DB5,
HACG01005556	A0A0B6Y9C1	gi|524906081|ref|XP_005108389.1|	8	24.8826	8	13	249.828	1DA5,1DB5,
HACG01017017	A0A0B6Z683	gi|524906238|ref|XP_005108452.1|	2	6.28803	2	2	63.11	1DB5,
HACG01008711	A0A0B6YIE0	gi|524906293|ref|XP_005108469.1|	2	33.7079	2	5	86.02	1DA4,1DB4,
HACG01021370	A0A0B6ZKF2	gi|524906293|ref|XP_005108469.1|	4	24.7423	4	4	68.13	1DB4,
HACG01008712	A0A0B6YHB7	gi|524906293|ref|XP_005108469.1|	7	49.0476	7	9	179.3	1DA4,1DB4,
HACG01005292	A0A0B6Y734	gi|524906359|ref|XP_005108493.1|	15	37.4165	15	26	539.956	1DA7,1DB3,1DB4,1DB5,1DB1,1DB2,1DB6,
HACG01021623	A0A0B6ZJ20	gi|524906398|ref|XP_005108509.1|	2	5.67823	2	2	53.79	1DB7,
HACG01037541	A0A0B7AWJ0	gi|524906491|ref|XP_005108543.1|	32	50.9501	33	101	1837.93	1DA1,1DA3,1DB3,1DA2,1DB1,1DA4,1DB2,1DA11,1DA7,1DB4,
HACG01029167	A0A0B7A5X1	gi|524906739|ref|XP_005108592.1|	5	25.8303	6	9	183.478	1DA7,1DB8,1DB7,
HACG01037238	A0A0B7ATC2	gi|524906745|ref|XP_005108595.1|	1	12.4161	3	3	33.0767	1DB8,
HACG01044062	A0A0B7BDJ8	gi|524906745|ref|XP_005108595.1|	1	27.5862	3	5	111.85	1DB8,
HACG01039947	A0A0B7B1R1	gi|524906745|ref|XP_005108595.1|	2	26.9565	5	5	55.77	1DB8,
HACG01039935	A0A0B7B3T9	gi|524906745|ref|XP_005108595.1|	3	31.3725	5	10	162.87	1DA7,1DB8,1DA11,
HACG01044204	A0A0B7BCM4	gi|524906745|ref|XP_005108595.1|	4	19.3133	4	4	50.37	1DB8,
HACG01032468	A0A0B7AEW0	gi|524906745|ref|XP_005108595.1|	5	38.2353	8	12	199.733	1DA7,1DA8,1DB8,
HACG01039943	A0A0B7B1A6	gi|524906745|ref|XP_005108595.1|	7	50.7353	10	28	510.2	1DA7,1DA8,1DB8,1DB9,
HACG01044083	A0A0B7BDC0	gi|524906745|ref|XP_005108595.1|	11	63.2727	11	41	894.043	1DA6,1DA7,1DA8,1DB7,1DB8,1DB9,1DB1,
HACG01039942	A0A0B7B1Q5	gi|524906862|ref|XP_005108596.1|	1	31.25	2	7	153.211	1DB8,
HACG01039941	A0A0B7B3D0	gi|524906862|ref|XP_005108596.1|	2	25.7426	2	3	68.5067	1DA6,1DA7,1DB7,
HACG01039945	A0A0B7B3U9	gi|524906862|ref|XP_005108596.1|	6	74.2574	6	9	133.161	1DA8,1DB8,
HACG01029272	A0A0B7A640	gi|524906932|ref|XP_005108623.1|	7	15.3326	12	13	262.565	1DB3,
HACG01029574	A0A0B7A692	gi|524906932|ref|XP_005108623.1|	7	21.5426	13	14	330.829	1DB3,
HACG01029572	A0A0B7A739	gi|524906932|ref|XP_005108623.1|	21	36.3946	27	37	608.631	1DA3,1DB3,1DB1,
HACG01016032	A0A0B6Z3F6	gi|524906990|ref|XP_005108638.1|	2	8.33333	2	3	47.39	1DA8,
HACG01010826	A0A0B6YPJ0	gi|524906990|ref|XP_005108638.1|	6	22.87	6	11	93.7318	1DA7,1DA8,1DB9,1DB8,
HACG01044206	A0A0B7BFJ1	gi|524907032|ref|XP_005108645.1|	1	21.1679	2	6	148.157	1DA7,1DA8,1DB8,1DB9,
HACG01044215	A0A0B7BFZ9	gi|524907032|ref|XP_005108645.1|	1	27.9412	4	6	87.59	1DB8,
HACG01039939	A0A0B7B0B6	gi|524907032|ref|XP_005108645.1|	3	53.2787	4	6	184.263	1DA8,1DB8,
HACG01033014	A0A0B7AFS7	gi|524907042|ref|XP_005108650.1|	6	26.2411	6	9	101.264	1DA7,1DB8,1DB1,
HACG01033015	A0A0B7AIX4	gi|524907042|ref|XP_005108650.1|	9	31.2057	9	9	115.19	1DB7,
HACG01043569	A0A0B7BAT3	gi|524907047|ref|XP_005108652.1|	7	16.7927	7	12	398.033	1DB3,1DB4,
HACG01012306	A0A0B6YTQ1	gi|524907151|ref|XP_005108701.1|	16	38.1651	16	33	669.182	1DA4,1DB5,1DB4,1DB1,
HACG01018709	A0A0B6ZAF3	gi|524907177|ref|XP_005108713.1|	2	12.2699	2	4	62.52	1DA2,1DB2,
HACG01049110	A0A0B7BV24	gi|524907181|ref|XP_005108715.1|	4	10.1664	4	7	255.271	1DA2,1DB2,1DB1,
HACG01022880	A0A0B6ZPU4	gi|524907228|ref|XP_005108737.1|	4	16.3522	4	4	101.66	1DB7,
HACG01044154	A0A0B7BCH9	gi|524907238|ref|XP_005108742.1|	4	11.8932	4	6	117.65	1DB5,1DB6,
HACG01015190	A0A0B6Z2Y3	gi|524907370|ref|XP_005108803.1|	6	26.0997	6	8	169.055	1DB6,
HACG01044631	A0A0B7BGS7	gi|524907372|ref|XP_005108804.1|	2	9.2219	2	3	69.2533	1DA6,1DB7,
HACG01018498	A0A0B6Z9T0	gi|524907406|ref|XP_005108821.1|	4	21.2329	4	6	184.61	1DA7,1DB8,
HACG01045963	A0A0B7BIS3	gi|524907491|ref|XP_005108862.1|	2	33.8983	2	2	39.52	1DA5,1DB5,
HACG01045962	A0A0B7BIW0	gi|524907491|ref|XP_005108862.1|	9	33.4347	9	26	559.268	1DA3,1DA4,1DA5,1DA6,1DA7,1DB1,1DB3,1DB4,1DB5,
HACG01036301	A0A0B7AT57	gi|524907533|ref|XP_005108883.1|	14	45.993	14	49	861.352	1DA7,1DA8,1DA9,1DB7,1DB8,1DB9,
HACG01020970	A0A0B6ZJ92	gi|524907576|ref|XP_005108904.1|	12	63.8889	12	147	3210.75	1DA1,1DA2,1DA3,1DA4,1DA5,1DA6,1DA7,1DA8,1DA9,1DB1,1DB2,1DB7,1DB8,1DB12,1DB3,1DA10,1DB4,1DB5,1DB11,
HACG01036710	A0A0B7AUM0	gi|524907580|ref|XP_005108906.1|	2	6.91244	2	3	96.9533	1DA8,1DA10,
HACG01042841	A0A0B7BBN2	gi|524907580|ref|XP_005108906.1|	2	6.56064	3	3	79.5233	1DB1,
HACG01042850	A0A0B7BC59	gi|524907580|ref|XP_005108906.1|	3	3.24575	4	5	103.6	1DB1,
HACG01042847	A0A0B7B9X9	gi|524907580|ref|XP_005108906.1|	4	57.8947	5	13	232.921	1DA1,1DB1,1DB2,
HACG01036711	A0A0B7AU92	gi|524907580|ref|XP_005108906.1|	49	28.1846	49	157	4163.64	1DA1,1DA2,1DB3,1DB4,1DA3,1DB5,1DA4,1DA6,1DA7,1DA5,1DA9,
HACG01036714	A0A0B7ARB9	gi|524907580|ref|XP_005108906.1|	76	42.8571	77	167	3385.94	1DB1,1DB2,
HACG01036871	A0A0B7AUP2	gi|524907590|ref|XP_005108911.1|	3	17.757	3	8	301.72	1DA7,1DA8,1DB8,
HACG01036874	A0A0B7ARS7	gi|524907590|ref|XP_005108911.1|	7	41.7722	7	20	286.48	1DA7,1DA8,1DB7,1DB8,1DB9,
HACG01036873	A0A0B7AS77	gi|524907590|ref|XP_005108911.1|	11	59.0909	11	21	438.604	1DA8,1DB8,
HACG01036242	A0A0B7AR86	gi|524907610|ref|XP_005108921.1|	9	33.8462	9	31	806.784	1DA3,1DA4,1DA5,1DB5,1DB6,1DA10,1DB4,1DB7,
HACG01026485	A0A0B7A044	gi|524907664|ref|XP_005108948.1|	4	7.06522	4	4	73.65	1DB4,
HACG01036577	A0A0B7AS90	gi|524907699|ref|XP_005108965.1|	2	14.3519	2	3	49.7767	1DA8,1DB8,
HACG01031205	A0A0B7ADF6	gi|524907727|ref|XP_005108978.1|	3	12.5874	3	3	62.6967	1DA7,1DB7,
HACG01011735	A0A0B6YSY4	gi|524907772|ref|XP_005108998.1|	7	25.3086	7	9	180.197	1DA5,1DB5,
HACG01037513	A0A0B7AU55	gi|524907822|ref|XP_005109023.1|	4	14.4444	4	6	107.09	1DA7,1DB8,
HACG01052905	A0A0B7C570	gi|524907836|ref|XP_005109029.1|	2	36.6197	2	4	132.43	1DA11,1DB11,1DB12,1DB13,
HACG01002224	A0A0B6XYW3	gi|524907998|ref|XP_005109108.1|	4	16.8091	4	5	128.62	1DB6,1DB7,
HACG01032568	A0A0B7AFB7	gi|524908000|ref|XP_005109109.1|	6	38.961	6	20	396.46	1DA7,1DA8,1DA9,1DA10,1DB4,1DB9,1DB10,1DB11,1DB13,
HACG01022525	A0A0B6ZNU7	gi|524908048|ref|XP_005109132.1|	3	4.53988	3	4	69.15	1DA3,1DB3,
HACG01040588	A0A0B7B381	gi|524908062|ref|XP_005109139.1|	2	25.4545	2	3	79.3967	1DB8,1DB9,
HACG01018823	A0A0B6ZB25	gi|524908062|ref|XP_005109139.1|	11	58.9958	11	21	558.923	1DA7,1DA8,1DB8,1DB7,
HACG01016741	A0A0B6Z6R4	gi|524908261|ref|XP_005109234.1|	3	13.0194	3	5	143.54	1DB2,1DB3,
HACG01016742	A0A0B6Z5G1	gi|524908261|ref|XP_005109234.1|	3	11.3636	3	6	119.64	1DB3,
HACG01023382	A0A0B6ZPC2	gi|524908282|ref|XP_005109244.1|	3	34.9693	3	14	376.447	1DA10,1DB13,1DA11,1DB10,1DB11,1DB12,
HACG01016988	A0A0B6Z5N6	gi|524908297|ref|XP_005109251.1|	3	10.7784	3	3	60.62	1DB5,
HACG01024929	A0A0B6ZT03	gi|524908412|ref|XP_005109303.1|	16	36.2887	16	20	307.07	1DA5,1DB5,
HACG01005671	A0A0B6Y886	gi|524908509|ref|XP_005109349.1|	10	55.3333	10	53	745.199	1DA7,1DA8,1DA9,1DA10,1DA11,1DA12,1DB1,1DB9,1DB10,1DB11,1DB12,1DB13,1DB8,
HACG01043209	A0A0B7B9R4	gi|524908561|ref|XP_005109374.1|	7	9.81964	7	13	188.691	1DA1,1DA2,1DB1,1DB2,
HACG01005849	A0A0B6Y952	gi|524908577|ref|XP_005109382.1|	3	8.70712	3	3	67.7633	1DB5,
HACG01025297	A0A0B6ZUX6	gi|524908579|ref|XP_005109383.1|	2	3.77668	2	2	69.91	1DB1,
HACG01028422	A0A0B7A3R8	gi|524908585|ref|XP_005109386.1|	2	13.3929	2	2	44.1	1DB8,
HACG01038658	A0A0B7AXM0	gi|524908782|ref|XP_005109481.1|	2	6.05469	2	2	25.78	1DA4,1DB1,
HACG01039340	A0A0B7B257	gi|524908892|ref|XP_005109535.1|	2	6.44258	2	2	43.3	1DB6,
HACG01020381	A0A0B6ZH82	gi|524908916|ref|XP_005109547.1|	4	11.4198	4	6	87.0767	1DA6,1DB6,
HACG01034740	A0A0B7ANW8	gi|524908996|ref|XP_005109585.1|	22	55.9917	22	86	1618.99	1DA1,1DA2,1DA4,1DA5,1DB1,1DB2,1DB4,1DB5,1DB6,1DA3,1DB3,1DA8,
HACG01034738	A0A0B7AL82	gi|524909004|ref|XP_005109589.1|	9	47.9821	12	70	905.933	1DA4,1DA5,1DA7,1DB1,1DB2,1DB6,1DB7,1DB9,1DA6,1DA9,1DB8,1DB4,
HACG01045438	A0A0B7BG51	gi|524909004|ref|XP_005109589.1|	11	60.7004	14	77	906.859	1DA7,1DA8,1DB1,1DB7,1DB9,1DB8,
HACG01047167	A0A0B7BMB1	gi|524909038|ref|XP_005109605.1|	11	34.2618	11	32	716.579	1DA4,1DA6,1DA10,1DA11,1DB1,1DB6,1DB7,
HACG01007510	A0A0B6YFS7	gi|524909114|ref|XP_005109609.1|	15	89.0909	19	426	7451.71	1DA1,1DA2,1DA3,1DA4,1DA7,1DA8,1DA9,1DA10,1DA11,1DB1,1DB3,1DB4,1DB8,1DB9,1DB10,1DB11,1DB12,1DB13,1DA5,1DA6,1DB5,1DB7,1DB6,
HACG01025971	A0A0B6ZYC5	gi|524909114|ref|XP_005109609.1|	19	92.1687	23	592	11226.8	1DA1,1DA2,1DA3,1DA4,1DA7,1DA8,1DA9,1DA10,1DA11,1DA12,1DB1,1DB2,1DB3,1DB4,1DB8,1DB9,1DB10,1DB11,1DB12,1DB13,1DA5,1DA6,1DB5,1DB7,1DB6,
HACG01020870	A0A0B6ZIY9	gi|524909120|ref|XP_005109612.1|	5	20	5	6	129.257	1DB7,
HACG01049760	A0A0B7BWS4	gi|524909155|ref|XP_005109628.1|	4	23.348	4	7	108.241	1DA9,1DB9,1DB10,
HACG01044866	A0A0B7BHS3	gi|524909189|ref|XP_005109645.1|	16	26.1128	16	23	369.47	1DB3,1DB4,
HACG01022436	A0A0B6ZN49	gi|524909236|ref|XP_005109667.1|	4	28.7671	5	11	235.655	1DA7,1DB8,1DB7,
HACG01012045	A0A0B6YTV8	gi|524909258|ref|XP_005109678.1|	9	42.6791	9	25	503.07	1DA6,1DB5,1DB7,1DB6,1DA11,1DB3,
HACG01027629	A0A0B7A0T0	gi|524909270|ref|XP_005109684.1|	3	12.6761	3	4	128.75	1DA7,1DB7,
HACG01046909	A0A0B7BKA5	gi|524909272|ref|XP_005109685.1|	4	51.7544	4	4	72.82	1DB10,
HACG01040373	A0A0B7B2G8	gi|524909283|ref|XP_005109690.1|	4	19.7952	4	8	214.93	1DA10,1DB10,1DB11,1DB13,1DB2,
HACG01019763	A0A0B6ZDG0	gi|524909434|ref|XP_005109764.1|	7	32.1608	7	12	116.197	1DA8,1DB9,1DB8,
HACG01032389	A0A0B7AE21	gi|524909457|ref|XP_005109775.1|	3	7.91209	3	5	156.23	1DB1,1DB5,
HACG01037639	A0A0B7ATZ5	gi|524909838|ref|XP_005109815.1|	11	33.853	11	20	479.06	1DA5,1DA6,1DB6,
HACG01013682	A0A0B6YWN1	gi|524909848|ref|XP_005109820.1|	10	49.1639	10	36	454.953	1DA1,1DA2,1DA3,1DA4,1DA5,1DA7,1DA8,1DB1,1DB2,1DB5,1DB7,1DB8,1DB9,1DA6,
HACG01049664	A0A0B7BTK4	gi|524909938|ref|XP_005109861.1|	2	6.56566	2	2	36.54	1DB6,
HACG01027615	A0A0B7A3F0	gi|524909958|ref|XP_005109871.1|	4	15.8055	4	4	87.92	1DB7,
HACG01008102	A0A0B6YFK8	gi|524909980|ref|XP_005109881.1|	2	17.8295	2	3	105.61	1DA12,1DB12,
HACG01029732	A0A0B7A7G1	gi|524910025|ref|XP_005109900.1|	2	17.5676	2	4	101.86	1DA10,1DB11,1DB13,
HACG01004682	A0A0B6Y5I1	gi|524910025|ref|XP_005109900.1|	10	89.1156	10	38	982.445	1DA10,1DA11,1DB11,1DB12,1DB13,
HACG01029881	A0A0B7A7V6	gi|524910197|ref|XP_005109980.1|	2	7.88177	2	3	174.093	1DA5,1DB5,
HACG01041725	A0A0B7B943	gi|524910284|ref|XP_005110023.1|	8	15.5059	8	11	242.9	1DB3,1DB4,
HACG01031919	A0A0B7ACN5	gi|524910373|ref|XP_005110066.1|	6	22.2628	7	8	198.16	1DA4,
HACG01031920	A0A0B7AFT2	gi|524910373|ref|XP_005110066.1|	8	22.7496	10	32	573.071	1DA4,1DA6,1DB4,1DA7,1DA8,1DB7,1DB6,1DB11,1DB13,
HACG01031913	A0A0B7ADC4	gi|524910373|ref|XP_005110066.1|	9	29.1169	10	24	344.258	1DA5,1DA9,1DA10,1DA11,1DA8,1DB10,1DB11,1DB13,1DB6,1DB8,
HACG01031914	A0A0B7ACM8	gi|524910373|ref|XP_005110066.1|	11	27.9553	13	20	392.48	1DB4,1DB5,
HACG01042042	A0A0B7B7P1	gi|524910383|ref|XP_005110071.1|	9	47.7178	9	22	593.587	1DA8,1DB8,1DB9,
HACG01047211	A0A0B7BNZ5	gi|524910389|ref|XP_005110074.1|	4	17.561	4	6	191.857	1DB1,1DB2,
HACG01044169	A0A0B7BCJ2	gi|524910500|ref|XP_005110126.1|	3	3.3256	3	3	38.7	1DB2,
HACG01005741	A0A0B6Y9V5	gi|524910546|ref|XP_005110149.1|	2	16.2437	2	7	212.821	1DA8,1DA9,1DB9,1DB10,
HACG01046021	A0A0B7BKL4	gi|524910660|ref|XP_005110205.1|	8	21.9858	8	19	409.816	1DA4,1DA5,1DA6,1DB6,
HACG01028265	A0A0B7A578	gi|524910662|ref|XP_005110206.1|	3	21.6216	3	3	45.12	1DB9,
HACG01032563	A0A0B7AEM7	gi|524910662|ref|XP_005110206.1|	5	37.1041	5	6	75.6267	1DA8,1DB8,
HACG01040685	A0A0B7B628	gi|524910744|ref|XP_005110246.1|	4	19.5035	4	4	120.13	1DB1,1DB3,
HACG01040684	A0A0B7B2I4	gi|524910744|ref|XP_005110246.1|	6	16.4905	6	12	285.567	1DA9,1DB1,1DB2,1DB3,
HACG01034598	A0A0B7AKV4	gi|524910816|ref|XP_005110282.1|	5	36.8723	18	32	609.57	1DA3,1DB2,1DB3,
HACG01034596	A0A0B7ANB6	gi|524910816|ref|XP_005110282.1|	8	26.8908	20	35	694.33	1DA1,1DA2,1DB2,1DB1,1DB4,1DA4,
HACG01029956	A0A0B7A9Z0	gi|524910825|ref|XP_005110286.1|	6	40	6	16	346.858	1DA7,1DA8,1DA10,1DB1,1DB8,
HACG01029960	A0A0B7AA23	gi|524910825|ref|XP_005110286.1|	9	47.4419	9	12	150.013	1DB9,
HACG01046622	A0A0B7BKS9	gi|524910831|ref|XP_005110289.1|	3	33.3333	3	6	77.3567	1DB1,1DB11,
HACG01029557	A0A0B7A6Z7	gi|524910869|ref|XP_005110308.1|	10	36.25	10	14	286.651	1DA5,1DB5,
HACG01041037	A0A0B7B4W7	gi|524910895|ref|XP_005110321.1|	6	22.5543	6	14	429.171	1DA5,1DA6,1DB6,1DB7,
HACG01035226	A0A0B7AQ08	gi|524910950|ref|XP_005110347.1|	3	8.80952	3	4	62.87	1DB5,
HACG01033724	A0A0B7AHW9	gi|524911076|ref|XP_005110408.1|	2	2.34455	2	2	58.85	1DB2,
HACG01041386	A0A0B7B7F6	gi|524911094|ref|XP_005110416.1|	59	40.0338	59	126	2582.16	1DA1,1DA2,1DA3,1DB1,1DB2,1DB3,
HACG01027517	A0A0B7A0K7	gi|524911110|ref|XP_005110424.1|	3	18.3333	3	5	114.54	1DA8,1DB8,
HACG01025339	A0A0B6ZWQ8	gi|524911122|ref|XP_005110430.1|	2	13.7441	2	5	111.92	1DA8,1DB8,1DB9,
HACG01046198	A0A0B7BJE7	gi|524911396|ref|XP_005110562.1|	11	44.0559	11	27	610.716	1DA7,1DA8,1DB8,1DB9,1DB10,
HACG01035713	A0A0B7AP21	gi|524911418|ref|XP_005110573.1|	14	20.8388	15	24	360.955	1DA4,1DB4,1DB3,
HACG01042176	A0A0B7B9T0	gi|524911477|ref|XP_005110601.1|	3	53	3	8	310.7	1DA4,1DB4,
HACG01002499	A0A0B6XZM9	gi|524911513|ref|XP_005110619.1|	6	33.3333	6	13	217.858	1DA8,1DA9,1DB9,1DB10,
HACG01016434	A0A0B6Z3U0	gi|524911542|ref|XP_005110633.1|	2	5.25253	2	5	200.07	1DA9,1DB10,
HACG01037189	A0A0B7ASQ3	gi|524911570|ref|XP_005110646.1|	1	14.3791	3	4	117.95	1DB1,
HACG01037199	A0A0B7ASQ8	gi|524911570|ref|XP_005110646.1|	2	5.59284	2	2	72.91	1DB1,
HACG01037196	A0A0B7AVN3	gi|524911570|ref|XP_005110646.1|	6	10.198	8	11	258.055	1DB1,1DB2,
HACG01037197	A0A0B7ATX1	gi|524911570|ref|XP_005110646.1|	150	48.4309	152	489	9983.41	1DA1,1DA2,1DA3,1DB1,1DB2,1DB3,1DA4,1DA9,1DB4,1DB7,1DA11,1DA6,1DA8,1DB9,1DA7,1DB5,1DB6,1DB8,
HACG01026077	A0A0B6ZXC2	gi|524911576|ref|XP_005110649.1|	6	31.5603	6	16	230.32	1DA7,1DA8,1DB8,1DB9,
HACG01022151	A0A0B6ZMD6	gi|524911650|ref|XP_005110685.1|	3	10.8108	3	5	173.47	1DA5,1DB6,
HACG01036379	A0A0B7AQE1	gi|524911666|ref|XP_005110693.1|	8	16.2602	8	11	248.141	1DA3,1DA4,1DB4,1DB1,
HACG01049717	A0A0B7BUI7	gi|524911866|ref|XP_005110793.1|	2	14.5161	2	9	185.797	1DA10,1DA11,1DB10,1DB11,1DB12,1DB13,
HACG01047786	A0A0B7BQK1	gi|524911939|ref|XP_005110827.1|	6	26.1029	6	12	287.703	1DA7,1DA8,1DB7,1DB8,
HACG01031340	A0A0B7AE10	gi|524911945|ref|XP_005110830.1|	1	62.5	5	15	360.123	1DA11,1DB11,1DB12,
HACG01031347	A0A0B7AC12	gi|524911947|ref|XP_005110831.1|	4	56.9024	18	373	6727.1	1DA1,1DA2,1DA3,1DA4,1DA5,1DA6,1DA7,1DA9,1DA11,1DB1,1DB2,1DB4,1DB5,1DB6,1DB7,1DB10,1DB11,1DB13,1DA12,1DB12,
HACG01031342	A0A0B7AC06	gi|524911947|ref|XP_005110831.1|	9	68.5484	16	311	6805.77	1DA1,1DA4,1DA5,1DA6,1DA7,1DA8,1DA9,1DA10,1DA11,1DB1,1DB2,1DB7,1DB8,1DB9,1DB10,1DB11,1DB12,1DA2,1DB13,
HACG01031727	A0A0B7AD63	gi|524911947|ref|XP_005110831.1|	9	64.1304	17	57	801.304	1DB8,
HACG01031348	A0A0B7ABQ4	gi|524911950|ref|XP_005110832.1|	4	53.2787	18	214	4236.3	1DA3,1DA6,1DA8,1DB3,1DB6,1DB8,1DB9,1DA12,1DB5,1DB4,1DA10,
HACG01031722	A0A0B7AD59	gi|524911952|ref|XP_005110833.1|	5	54.4118	9	51	818.135	1DA1,1DA9,1DB3,1DB4,1DB9,1DB10,1DA12,
HACG01031725	A0A0B7AFA0	gi|524911952|ref|XP_005110833.1|	6	60.3239	15	170	3006.33	1DA2,1DA7,1DA8,1DA9,1DB1,1DA3,1DA4,1DA6,1DA10,1DB5,1DB6,1DB7,1DB13,1DB11,
HACG01031728	A0A0B7ACV3	gi|524911952|ref|XP_005110833.1|	7	68.2008	16	88	1738.49	1DA7,1DB7,1DA8,1DB8,1DB11,
HACG01031723	A0A0B7ACU9	gi|524911954|ref|XP_005110834.1|	11	41.3462	21	146	2639.41	1DA2,1DA4,1DA5,1DA6,1DA11,1DB1,1DB5,1DB6,1DB7,1DB10,1DB4,1DB3,1DB2,1DB12,
HACG01031349	A0A0B7AB22	gi|524911954|ref|XP_005110834.1|	16	42.8344	19	61	1188.4	1DA3,1DA4,1DB1,1DB3,1DB4,
HACG01021779	A0A0B6ZJ43	gi|524912055|ref|XP_005110881.1|	3	6.61157	3	4	111.54	1DB1,1DB4,
HACG01006190	A0A0B6YC64	gi|524912187|ref|XP_005110945.1|	2	12.5	2	3	90.6833	1DA3,1DB3,
HACG01018473	A0A0B6Z9Z3	gi|524912187|ref|XP_005110945.1|	3	10.4938	3	3	73.1633	1DB3,
HACG01006458	A0A0B6YCV3	gi|524912191|ref|XP_005110947.1|	2	42.1875	2	2	62.55	1DB1,
HACG01006459	A0A0B6YAV5	gi|524912191|ref|XP_005110947.1|	9	67.2414	9	20	250.87	1DB9,1DB10,1DB11,1DB12,1DB13,
HACG01046894	A0A0B7BK89	gi|524912355|ref|XP_005111027.1|	3	15.4589	3	5	83.84	1DA7,1DA8,1DB7,1DB9,
HACG01027574	A0A0B7A0P7	gi|524912369|ref|XP_005111034.1|	2	8.06916	2	3	167.987	1DA7,1DB7,
HACG01011781	A0A0B6YS89	gi|524912387|ref|XP_005111042.1|	2	7.66962	2	2	35.86	1DB3,
HACG01045693	A0A0B7BHY4	gi|524912440|ref|XP_005111068.1|	18	64	18	307	6516.96	1DA1,1DA2,1DA3,1DA4,1DA7,1DA8,1DA9,1DA10,1DA12,1DB1,1DB2,1DB3,1DB7,1DB8,1DB9,1DB10,1DB11,1DB12,1DA5,1DA6,1DB4,1DB6,1DB5,
HACG01027076	A0A0B7A1I3	gi|524912496|ref|XP_005111095.1|	1	8.7963	3	3	56.88	1DB5,
HACG01027077	A0A0B7A069	gi|524912496|ref|XP_005111095.1|	1	8.42825	3	3	65.9733	1DB5,
HACG01040009	A0A0B7B0K1	gi|524912621|ref|XP_005111155.1|	1	28.4916	3	3	50.7833	1DB7,
HACG01028779	A0A0B7A3X2	gi|524912628|ref|XP_005111158.1|	2	6.21622	2	4	81.94	1DA4,1DB4,
HACG01028797	A0A0B7A4T2	gi|524912696|ref|XP_005111190.1|	2	16.1972	2	4	42.23	1DB7,1DB8,
HACG01034451	A0A0B7AMU4	gi|524912715|ref|XP_005111198.1|	1	40.7452	27	41	981.942	1DB3,
HACG01034448	A0A0B7AKA6	gi|524912715|ref|XP_005111198.1|	17	45.2292	30	66	1606.98	1DA3,1DB3,1DB4,1DB1,
HACG01028225	A0A0B7A547	gi|524912806|ref|XP_005111241.1|	6	16.8646	6	6	128.717	1DB3,1DB5,
HACG01033795	A0A0B7AL46	gi|524912848|ref|XP_005111261.1|	7	28.972	7	12	150.49	1DB1,1DB5,1DB6,1DB4,1DB2,
HACG01005544	A0A0B6YAF2	gi|524912919|ref|XP_005111295.1|	6	17.2811	6	7	179.201	1DA5,1DB5,1DB6,
HACG01033450	A0A0B7AK63	gi|524912927|ref|XP_005111299.1|	3	42.6357	3	9	197.516	1DA12,1DB11,1DB12,
HACG01037912	A0A0B7AVU5	gi|524912927|ref|XP_005111299.1|	6	71.3178	6	27	531.129	1DA11,1DA12,1DB11,1DB12,
HACG01033453	A0A0B7AHN0	gi|524912929|ref|XP_005111300.1|	6	53.6765	6	42	712.887	1DA7,1DA8,1DA9,1DA10,1DA11,1DA12,1DB10,1DB11,1DB12,
HACG01037915	A0A0B7AXZ4	gi|524912929|ref|XP_005111300.1|	9	77.3723	9	105	2317.91	1DA6,1DA8,1DA9,1DA10,1DA11,1DA12,1DB9,1DB10,1DB11,1DB12,1DB13,1DB8,1DB1,
HACG01016358	A0A0B6Z3T6	gi|524912990|ref|XP_005111329.1|	9	45.2962	9	12	241.23	1DA7,1DB7,
HACG01036632	A0A0B7AR58	gi|524913016|ref|XP_005111342.1|	5	25.2137	5	7	135.043	1DA8,1DB8,
HACG01048067	A0A0B7BQ04	gi|524913026|ref|XP_005111347.1|	4	14.2276	5	8	193.565	1DB1,1DB2,
HACG01045941	A0A0B7BKD8	gi|524913044|ref|XP_005111356.1|	12	46.6276	12	39	803.834	1DA4,1DB7,1DA5,1DA6,1DA7,1DA11,1DB6,1DB8,1DB1,1DB5,
HACG01029410	A0A0B7A8F9	gi|524913109|ref|XP_005111388.1|	12	68.4729	12	62	1079.51	1DA4,1DA7,1DA8,1DA9,1DA10,1DB9,1DB10,1DB13,1DB8,1DB11,1DB4,
HACG01036827	A0A0B7AST0	gi|524913132|ref|XP_005111399.1|	4	28.6517	4	7	83.2871	1DA7,1DA8,1DB7,1DB8,1DB9,
HACG01003844	A0A0B6Y3K7	gi|524913184|ref|XP_005111424.1|	3	20.0957	3	6	157.993	1DA9,1DB9,1DB10,
HACG01048619	A0A0B7BQE9	gi|524913273|ref|XP_005111468.1|	3	26.2195	3	9	286.351	1DA10,1DB10,1DB11,1DB12,1DB13,
HACG01037994	A0A0B7AUZ0	gi|524913352|ref|XP_005111507.1|	2	16.9355	2	4	57.38	1DA10,1DB13,
HACG01011546	A0A0B6YRL9	gi|524913368|ref|XP_005111515.1|	7	41.9476	7	16	374.217	1DA4,1DA5,1DA6,1DB5,1DB6,1DB7,
HACG01045659	A0A0B7BGR9	gi|524913419|ref|XP_005111540.1|	7	6.93607	8	33	1011.92	1DA1,1DA2,1DB1,1DB2,
HACG01033394	A0A0B7AGY1	gi|524913419|ref|XP_005111540.1|	8	6.57096	9	43	1232.23	1DA1,1DA2,1DA3,1DA4,1DB1,1DB2,1DB3,
HACG01027972	A0A0B7A2K1	gi|524913423|ref|XP_005111542.1|	5	51.8519	5	24	959.565	1DA3,1DA4,1DA5,1DA9,1DA11,1DB1,1DB4,1DB5,1DB8,
HACG01005114	A0A0B6Y781	gi|524913658|ref|XP_005111654.1|	6	59.5506	6	42	819.328	1DA9,1DA10,1DA11,1DA12,1DB1,1DB10,1DB11,1DB12,1DB13,
HACG01022887	A0A0B6ZMX6	gi|524913662|ref|XP_005111656.1|	2	11.0599	2	3	57.4033	1DB9,
HACG01005095	A0A0B6Y968	gi|524913662|ref|XP_005111656.1|	3	13.9738	3	4	85.97	1DB9,
HACG01006431	A0A0B6YBU6	gi|524913668|ref|XP_005111659.1|	3	20.197	3	6	152.8	1DA4,1DB4,1DB9,
HACG01031907	A0A0B7ADQ2	gi|524913685|ref|XP_005111667.1|	2	8.50112	2	3	97.0333	1DB5,
HACG01046193	A0A0B7BJE2	gi|524913755|ref|XP_005111702.1|	4	31.0345	4	4	124.99	1DB11,
HACG01023934	A0A0B6ZQ75	gi|524913818|ref|XP_005111733.1|	8	29.5732	9	19	395.878	1DA6,1DA7,1DB6,1DB4,1DB5,
HACG01023937	A0A0B6ZQX7	gi|524913818|ref|XP_005111733.1|	9	30.7937	11	14	261.119	1DB7,
HACG01005289	A0A0B6Y7M3	gi|524913818|ref|XP_005111733.1|	11	50.5495	13	38	668.259	1DA5,1DA6,1DA7,1DB7,1DB8,1DB1,
HACG01025936	A0A0B6ZWR8	gi|524913834|ref|XP_005111741.1|	2	9.4697	2	2	73.6	1DA6,1DB7,
HACG01035626	A0A0B7AR88	gi|524913836|ref|XP_005111742.1|	2	1.70648	2	2	41.14	1DA3,
HACG01032642	A0A0B7AFW3	gi|524913879|ref|XP_005111762.1|	3	6.87332	3	5	172.71	1DB4,
HACG01044918	A0A0B7BFL3	gi|524913881|ref|XP_005111763.1|	1	2.65781	2	5	66.91	1DA4,1DB3,1DB4,
HACG01046081	A0A0B7BKU3	gi|524913881|ref|XP_005111763.1|	5	9.63455	5	9	93.9922	1DB1,1DB3,1DB4,
HACG01044912	A0A0B7BFW9	gi|524913881|ref|XP_005111763.1|	20	46.5116	22	81	2222.5	1DA1,1DA2,1DA4,1DB3,1DA3,1DB1,1DB2,1DA5,1DA9,
HACG01044921	A0A0B7BEN7	gi|524913881|ref|XP_005111763.1|	22	46.6777	26	42	965.591	1DB4,
HACG01028743	A0A0B7A3T5	gi|524913883|ref|XP_005111764.1|	3	24.6964	3	6	58.01	1DA8,1DB8,
HACG01039357	A0A0B7B020	gi|524913929|ref|XP_005111786.1|	4	6.24133	4	6	86.17	1DB1,1DB3,
HACG01020438	A0A0B6ZFH7	gi|524914082|ref|XP_005111860.1|	5	35.5212	6	7	106.89	1DA7,1DB8,
HACG01044771	A0A0B7BFH7	gi|524914146|ref|XP_005111892.1|	3	4.6332	3	4	66.92	1DB1,1DB3,
HACG01012309	A0A0B6YSD2	gi|524914201|ref|XP_005111919.1|	2	15.0685	2	2	45.86	1DB13,
HACG01026134	A0A0B6ZWQ2	gi|524914230|ref|XP_005111933.1|	8	19.1358	8	9	127.246	1DB6,
HACG01010547	A0A0B6YMK8	gi|524914287|ref|XP_005111960.1|	3	27.8571	3	4	112.17	1DA6,1DB6,
HACG01042186	A0A0B7B9T6	gi|524914293|ref|XP_005111963.1|	5	27.4611	5	14	160.767	1DA9,1DA10,1DB10,1DB13,
HACG01020414	A0A0B6ZF83	gi|524914353|ref|XP_005111992.1|	3	12.9683	3	4	85.39	1DB6,1DB7,
HACG01038758	A0A0B7AXU0	gi|524914370|ref|XP_005112000.1|	2	12.5581	2	3	44.4067	1DA6,1DB6,
HACG01039198	A0A0B7AZ66	gi|524914469|ref|XP_005112049.1|	11	46.1847	11	38	490.431	1DA1,1DA2,1DA5,1DA7,1DA9,1DB1,1DB2,1DB5,1DB7,1DB6,1DA6,1DA4,1DA12,
HACG01032283	A0A0B7AGV3	gi|524914499|ref|XP_005112064.1|	4	8	4	4	58.08	1DB4,1DB5,
HACG01043605	A0A0B7BEA7	gi|524914515|ref|XP_005112072.1|	5	26.0331	5	6	56.0033	1DB8,1DB9,
HACG01025332	A0A0B6ZV11	gi|524914607|ref|XP_005112116.1|	5	23.4875	5	13	134.194	1DA7,1DB7,1DB8,
HACG01037895	A0A0B7AXX0	gi|524914697|ref|XP_005112160.1|	2	11.1111	2	2	37.8	1DB6,
HACG01039170	A0A0B7B1Q6	gi|524914776|ref|XP_005112198.1|	2	7.01754	2	2	24.97	1DB7,
HACG01026171	A0A0B6ZYZ6	gi|524914806|ref|XP_005112213.1|	3	6.57895	3	5	74.61	1DB1,1DB3,1DB2,
HACG01033827	A0A0B7AJC2	gi|524914829|ref|XP_005112224.1|	11	40.9639	11	43	1184.06	1DA1,1DA2,1DA3,1DA4,1DA12,1DB2,1DB3,1DB4,1DB1,
HACG01035499	A0A0B7AP52	gi|524914862|ref|XP_005112240.1|	6	29.7203	6	16	392.285	1DA6,1DA7,1DB1,1DB6,1DB7,
HACG01041411	A0A0B7B7I0	gi|524914870|ref|XP_005112244.1|	5	31.068	5	5	95.27	1DA8,1DB9,
HACG01036896	A0A0B7AT03	gi|524914926|ref|XP_005112272.1|	2	7.73067	2	4	150.76	1DA3,1DB3,1DB4,
HACG01022068	A0A0B6ZKD4	gi|524914928|ref|XP_005112273.1|	3	9.62567	3	4	78.76	1DA4,1DB4,
HACG01013248	A0A0B6YV64	gi|524914928|ref|XP_005112273.1|	4	15.8904	4	9	326.296	1DA3,1DB3,1DB4,
HACG01036535	A0A0B7AU39	gi|524915110|ref|XP_005112361.1|	16	38.843	16	45	697.78	1DA2,1DA3,1DA5,1DA7,1DB2,1DB3,1DB4,1DB5,1DA4,1DB1,
HACG01020574	A0A0B6ZFT4	gi|524915372|ref|XP_005112487.1|	3	17.4419	3	3	60.1733	1DB13,
HACG01042087	A0A0B7B7K6	gi|524915376|ref|XP_005112489.1|	2	16.0535	3	4	95.57	1DB7,
HACG01016352	A0A0B6Z4B0	gi|524915376|ref|XP_005112489.1|	3	15.4362	4	4	95.76	1DB7,
HACG01025155	A0A0B6ZW92	gi|524915397|ref|XP_005112499.1|	6	19.7889	6	14	355.706	1DA5,1DA6,1DB6,1DB7,
HACG01040174	A0A0B7B4K8	gi|524915405|ref|XP_005112503.1|	4	36.7521	4	20	442.94	1DA12,1DB11,1DB12,
HACG01005616	A0A0B6Y9I4	gi|524915427|ref|XP_005112513.1|	5	11.3772	5	6	190.137	1DB4,
HACG01002130	A0A0B6Y0G6	gi|524915538|ref|XP_005112566.1|	2	22.8758	2	4	87.3	1DA11,1DB11,1DB13,
HACG01036779	A0A0B7AUV1	gi|524915657|ref|XP_005112621.1|	7	29.2453	7	9	181.861	1DA6,1DB7,
HACG01005293	A0A0B6Y7Q6	gi|524915677|ref|XP_005112631.1|	5	40.1408	5	22	447.342	1DA8,1DA9,1DA10,1DA11,1DB11,1DB12,1DB13,1DB10,
HACG01043042	A0A0B7BAJ1	gi|524915771|ref|XP_005112676.1|	8	44.1341	9	81	1337.4	1DA1,1DA2,1DA4,1DA5,1DA7,1DA8,1DA9,1DB1,1DB4,1DB7,1DB8,1DB9,1DB10,1DB6,
HACG01043043	A0A0B7BA58	gi|524915771|ref|XP_005112676.1|	9	43.3962	11	105	1653.94	1DA4,1DA7,1DA8,1DB1,1DB2,1DB3,1DB7,1DB8,1DB9,1DB10,1DA5,1DA6,1DA10,1DA11,
HACG01005374	A0A0B6Y7V2	gi|524915787|ref|XP_005112684.1|	5	33.3333	5	12	182.603	1DA12,1DB12,1DB11,
HACG01041190	A0A0B7B7H9	gi|524915789|ref|XP_005112685.1|	11	28	11	19	408.331	1DA5,1DB5,1DB6,
HACG01012813	A0A0B6YTV2	gi|524915986|ref|XP_005112777.1|	7	60	7	38	555.579	1DA10,1DA11,1DA12,1DB11,1DB12,
HACG01016538	A0A0B6Z4D6	gi|524915990|ref|XP_005112779.1|	5	21.1111	5	7	135.404	1DB8,
HACG01026903	A0A0B6ZYT4	gi|524916025|ref|XP_005112795.1|	27	76.6204	28	309	8061.88	1DA1,1DA2,1DA3,1DA4,1DA5,1DA6,1DA7,1DA8,1DA9,1DB1,1DB2,1DB3,1DB4,1DB5,1DB6,1DB7,1DB8,1DB9,1DB10,1DB13,1DA12,
HACG01012046	A0A0B6YT18	gi|524916029|ref|XP_005112797.1|	9	35.3503	9	46	991.903	1DA1,1DA2,1DA4,1DA5,1DA9,1DB1,1DB2,1DB5,1DB6,1DA3,1DA6,1DA7,1DA8,1DB3,1DB4,1DB7,1DA11,
HACG01005848	A0A0B6Y9A8	gi|524916301|ref|XP_005112930.1|	5	18.1481	5	9	131.416	1DA7,1DB1,1DB7,1DB8,
HACG01022988	A0A0B6ZMU2	gi|524916317|ref|XP_005112938.1|	2	23.9437	2	4	194.12	1DA11,1DB12,
HACG01042454	A0A0B7B7J9	gi|524916317|ref|XP_005112938.1|	2	15.7303	2	6	85.69	1DA10,1DA11,1DB11,1DB12,
HACG01036933	A0A0B7ASD7	gi|524916381|ref|XP_005112969.1|	2	16.8317	2	3	38.7733	1DB8,
HACG01036934	A0A0B7ARZ2	gi|524916381|ref|XP_005112969.1|	2	16	2	2	51.51	1DB9,
HACG01027248	A0A0B6ZZT6	gi|524916381|ref|XP_005112969.1|	7	29.3436	7	8	97.745	1DB7,
HACG01049598	A0A0B7BU32	gi|524916452|ref|XP_005113003.1|	19	54.902	19	139	1903.21	1DA1,1DA2,1DA3,1DA4,1DA5,1DB2,1DB4,1DB5,1DB6,1DB1,1DB3,1DA6,1DA9,1DA11,
HACG01027345	A0A0B7A2M0	gi|524916499|ref|XP_005113026.1|	6	31.338	6	15	377.43	1DA7,1DB7,1DB8,
HACG01037213	A0A0B7ASS1	gi|524916507|ref|XP_005113030.1|	9	45.0617	12	14	230.09	1DA6,1DB6,1DB7,
HACG01037215	A0A0B7ATA4	gi|524916507|ref|XP_005113030.1|	16	61.1111	19	65	1077.03	1DA4,1DA6,1DB6,1DB7,1DA5,1DB5,
HACG01044420	A0A0B7BGH5	gi|524916570|ref|XP_005113059.1|	3	62.4204	8	23	262.217	1DB1,1DB10,1DB13,
HACG01046672	A0A0B7BKX0	gi|524916570|ref|XP_005113059.1|	5	67.0391	9	39	606.355	1DA8,1DA9,1DA10,1DB8,1DB9,1DB10,1DB13,
HACG01015953	A0A0B6Z2P1	gi|524916593|ref|XP_005113070.1|	2	42.4437	10	20	434.15	1DB6,
HACG01038531	A0A0B7AZA8	gi|524916593|ref|XP_005113070.1|	7	40.6542	8	25	456.62	1DA8,1DB8,1DB9,
HACG01035141	A0A0B7APU7	gi|524916601|ref|XP_005113074.1|	2	34.4	3	12	258.527	1DA1,1DA2,1DB1,1DB2,
HACG01035138	A0A0B7AMH9	gi|524916601|ref|XP_005113074.1|	3	22.1774	4	9	100.058	1DA2,1DB1,1DB2,
HACG01035144	A0A0B7ALV8	gi|524916601|ref|XP_005113074.1|	3	23.6196	6	11	254.18	1DA1,1DA2,1DB1,1DB2,
HACG01032767	A0A0B7AF40	gi|524916601|ref|XP_005113074.1|	18	24.9595	20	85	2449.5	1DA1,1DA3,1DA4,1DA5,1DA8,1DA9,1DB3,1DA6,1DB4,1DA11,1DA12,1DB12,1DA10,
HACG01032768	A0A0B7AFT1	gi|524916601|ref|XP_005113074.1|	40	42.2137	45	118	2572.05	1DA2,1DB1,1DB2,
HACG01041240	A0A0B7B7M2	gi|524916607|ref|XP_005113077.1|	8	41.3333	8	26	344.934	1DA7,1DB8,1DA8,1DB9,
HACG01048514	A0A0B7BQ01	gi|524916639|ref|XP_005113093.1|	3	20.4301	3	7	158.754	1DB2,1DB3,1DB4,1DB5,
HACG01036841	A0A0B7AUL3	gi|524916644|ref|XP_005113095.1|	3	13.1086	3	10	164.01	1DA6,1DB7,1DB8,1DB9,
HACG01028749	A0A0B7A3U0	gi|524916925|ref|XP_005113230.1|	2	5.074	2	3	45.9133	1DB3,
HACG01033985	A0A0B7ALN2	gi|524916993|ref|XP_005113263.1|	3	8.33333	3	3	96.16	1DB5,
HACG01033260	A0A0B7AJM4	gi|524917226|ref|XP_005113374.1|	2	6.86813	2	2	25.61	1DA1,1DB2,
HACG01011125	A0A0B6YRB2	gi|524917241|ref|XP_005113381.1|	12	42.5532	12	139	2324.06	1DA2,1DA3,1DA4,1DA5,1DA6,1DA7,1DA8,1DA12,1DB1,1DB5,1DB6,1DB7,1DB8,1DB9,1DB11,1DA9,1DA10,1DB3,
HACG01027736	A0A0B7A3F7	gi|524917273|ref|XP_005113396.1|	5	22.0833	5	16	287.738	1DA7,1DA8,1DB1,1DB7,1DB8,
HACG01006651	A0A0B6YCG8	gi|524917285|ref|XP_005113402.1|	13	51.6667	13	42	482.45	1DA1,1DA6,1DA7,1DB1,1DB7,1DB8,1DA4,1DA8,1DB9,1DB2,1DB6,
HACG01036076	A0A0B7ASL3	gi|525007750|ref|XP_005051527.1|	5	26.2806	8	19	359.424	1DB4,1DB5,
HACG01006012	A0A0B6Y975	gi|526117361|ref|NP_001267749.1|	5	59.0551	5	176	3178.35	1DA2,1DA4,1DA5,1DA6,1DA7,1DA8,1DA9,1DA10,1DA11,1DA12,1DB1,1DB5,1DB7,1DB9,1DB10,1DB11,1DB12,1DB13,1DB4,1DB6,1DB8,
HACG01026662	A0A0B6ZYX4	gi|526117385|ref|NP_001267755.1|	18	79.2285	19	353	10785.4	1DA1,1DA2,1DA3,1DA4,1DA5,1DA6,1DA7,1DA8,1DA9,1DA10,1DB1,1DB3,1DB4,1DB5,1DB6,1DB7,1DB12,1DA11,1DA12,1DB2,1DB10,1DB11,1DB8,1DB9,
HACG01031217	A0A0B7ABQ5	gi|526117385|ref|NP_001267755.1|	19	73.2955	20	133	3575.77	1DA1,1DA2,1DA3,1DA4,1DA5,1DA6,1DA7,1DA8,1DB1,1DB4,1DB5,1DB6,1DB7,1DB8,1DA9,1DA10,1DB9,
HACG01027569	A0A0B7A0P5	gi|526117405|ref|NP_001267760.1|	5	64.881	10	38	188.338	1DB10,1DB13,
HACG01020603	A0A0B6ZG22	gi|526117405|ref|NP_001267760.1|	15	82.3529	15	216	3210.81	1DA6,1DA7,1DA8,1DA9,1DA10,1DA12,1DB10,1DB13,1DB2,1DB4,1DB9,1DB11,1DB12,1DA11,
HACG01043127	A0A0B7BAT8	gi|526117417|ref|NP_001267763.1|	2	4.17335	2	3	53.4033	1DB3,1DB4,
HACG01037747	A0A0B7AUT8	gi|526117431|ref|NP_001267767.1|	3	31.25	5	86	1229.81	1DA11,1DB10,1DB11,1DB12,1DB13,
HACG01014483	A0A0B6YYP6	gi|526117443|ref|NP_001267770.1|	2	9.00474	2	6	125.05	1DA4,1DA6,1DB4,1DB5,1DB6,
HACG01022356	A0A0B6ZMW6	gi|529444582|ref|XP_005242003.1|	4	24.6988	4	6	93.5533	1DA10,1DB11,1DB13,
HACG01013323	A0A0B6YVE0	gi|537705579|dbj|BAN81895.1|	1	30.2158	4	8	188.865	1DB5,
HACG01042708	A0A0B7B969	gi|54020890|ref|NP_001005689.1|	5	19.2308	5	7	89.1057	1DB6,1DB11,
HACG01042710	A0A0B7BBV4	gi|54020890|ref|NP_001005689.1|	16	58.589	16	101	2534.23	1DA1,1DA4,1DA6,1DA7,1DA9,1DB1,1DB2,1DB4,1DB5,1DB7,1DA2,1DA5,1DA10,1DB3,1DA3,1DA12,1DA8,
HACG01042838	A0A0B7B9H8	gi|54020890|ref|NP_001005689.1|	17	66.4596	17	94	1679.07	1DA1,1DA2,1DA3,1DA4,1DA5,1DA6,1DA7,1DA8,1DA10,1DB1,1DB2,1DB3,1DB6,1DB7,1DA11,1DB4,1DB8,1DB5,
HACG01012056	A0A0B6YT29	gi|541039654|gb|ERG79357.1|	6	21.3333	6	6	218.633	1DB6,
HACG01037696	A0A0B7AWY4	gi|541950160|ref|XP_005432023.1|	2	40.1869	7	28	557.357	1DA5,1DB5,
HACG01006330	A0A0B6YCI2	gi|544604255|sp|Q3YLA4.2|NCS1_LYMST	4	26.8156	4	6	183.18	1DA9,1DB10,1DB9,
HACG01002089	A0A0B6XYJ9	gi|546679302|gb|ERL89789.1|	2	24.4444	2	2	64.21	1DB13,
HACG01034279	A0A0B7AJF2	gi|546686668|gb|ERL95792.1|	5	38.843	5	8	211.645	1DA6,1DB6,1DB7,
HACG01018046	A0A0B6ZAD7	gi|554529929|ref|XP_005859764.1|	4	47.4453	4	7	97.8071	1DA11,1DB11,1DB12,
HACG01033256	A0A0B7AJ70	gi|555688717|gb|ESN91949.1|	16	79.2857	20	305	6418.05	1DA1,1DA2,1DA3,1DA4,1DA5,1DA6,1DA7,1DA8,1DB1,1DB2,1DB3,1DB4,1DB5,1DB6,1DB7,1DB8,1DB9,1DB10,1DB11,1DB12,1DB13,1DA9,
HACG01031858	A0A0B7AD60	gi|555704960|gb|ESO08193.1|	4	45.6	4	24	468.583	1DA9,1DA10,1DA11,1DA12,1DB11,1DB12,1DB13,
HACG01005650	A0A0B6YAN7	gi|555706265|gb|ESO09498.1|	2	13.089	2	6	113.44	1DB1,1DB10,1DB8,
HACG01005651	A0A0B6Y9L5	gi|555706265|gb|ESO09498.1|	5	29.4737	5	9	198.816	1DA8,1DA9,1DB9,
HACG01002367	A0A0B6XYS2	gi|555930987|emb|CDJ08105.1|	6	78.1818	6	27	349.585	1DA9,1DA11,1DA12,1DB11,1DB12,1DB13,
HACG01022292	A0A0B6ZL79	gi|556093552|gb|ESO82205.1|	6	35.9155	6	15	249.783	1DA11,1DB11,1DB12,1DB13,
HACG01022978	A0A0B6ZMT3	gi|556093608|gb|ESO82261.1|	2	9.59596	2	2	50.39	1DB7,
HACG01036260	A0A0B7AT97	gi|556093757|gb|ESO82410.1|	9	30.9045	9	10	138.65	1DA3,1DB3,
HACG01047647	A0A0B7BNP4	gi|556093891|gb|ESO82544.1|	9	46.8	9	10	167.93	1DA8,1DB8,
HACG01038049	A0A0B7AV53	gi|556093971|gb|ESO82624.1|	2	16.3842	2	5	94.99	1DB7,1DB13,1DB8,
HACG01038249	A0A0B7AVQ7	gi|556094374|gb|ESO83027.1|	3	12.5	3	3	73.93	1DB5,
HACG01025349	A0A0B6ZUA4	gi|556094506|gb|ESO83159.1|	4	21.1268	4	5	74.2	1DA8,1DB9,
HACG01022221	A0A0B6ZMJ9	gi|556094522|gb|ESO83175.1|	4	8.95009	4	5	100	1DB4,1DB5,
HACG01044542	A0A0B7BEW8	gi|556094806|gb|ESO83459.1|	8	26.6979	8	13	227.03	1DA5,1DA6,1DB5,1DB6,
HACG01043210	A0A0B7BD51	gi|556094817|gb|ESO83470.1|	7	8.75233	7	10	137.43	1DB1,1DB2,
HACG01031816	A0A0B7AF49	gi|556095158|gb|ESO83811.1|	12	42.7992	16	38	1142.52	1DA4,1DA5,1DB4,1DB5,1DA10,
HACG01031815	A0A0B7AFI5	gi|556095158|gb|ESO83811.1|	13	41.785	16	47	1133.29	1DA3,1DA4,1DA5,1DA7,1DA8,1DB1,1DB4,1DB5,
HACG01024134	A0A0B6ZQV8	gi|556095216|gb|ESO83869.1|	5	28.626	5	14	329.667	1DA8,1DB8,1DB9,
HACG01007622	A0A0B6YE78	gi|556095217|gb|ESO83870.1|	2	13.0137	2	4	106.85	1DA11,1DB11,1DB13,
HACG01024668	A0A0B6ZSM2	gi|556095567|gb|ESO84220.1|	10	28.4024	11	28	653.364	1DA3,1DA4,1DA5,1DB5,1DB4,
HACG01033471	A0A0B7AJY5	gi|556095567|gb|ESO84220.1|	12	43.3628	13	31	735.168	1DA4,1DB4,1DB5,
HACG01041988	A0A0B7B767	gi|556095696|gb|ESO84349.1|	5	19.1977	5	6	77.1467	1DB1,1DB2,
HACG01031057	A0A0B7AAB9	gi|556095970|gb|ESO84622.1|	2	11.2613	2	4	140.05	1DB8,1DB9,
HACG01047259	A0A0B7BPP0	gi|556096092|gb|ESO84744.1|	30	46.0459	30	136	2794.28	1DA1,1DA2,1DA3,1DA4,1DB3,1DB4,1DA5,1DB1,1DA9,1DA7,1DB2,1DA6,
HACG01038371	A0A0B7AYU4	gi|556096138|gb|ESO84790.1|	46	74.3097	46	352	7897.3	1DA1,1DA2,1DA3,1DA4,1DA5,1DA6,1DA7,1DB1,1DB2,1DB3,1DB4,1DB5,1DB7,1DB8,1DA8,1DA9,
HACG01023320	A0A0B6ZR19	gi|556096567|gb|ESO85219.1|	11	19.5994	11	17	214.502	1DB1,1DB4,1DB3,1DB2,
HACG01002094	A0A0B6XYK2	gi|556097053|gb|ESO85705.1|	6	25.3205	6	8	288.525	1DB1,1DB6,1DB7,
HACG01028760	A0A0B7A6K9	gi|556097226|gb|ESO85878.1|	2	5.01253	2	2	39.11	1DB7,
HACG01028763	A0A0B7A498	gi|556097226|gb|ESO85878.1|	4	11.6751	4	4	64.32	1DB6,
HACG01046051	A0A0B7BKQ0	gi|556097339|gb|ESO85991.1|	9	11.3084	9	14	258.603	1DA2,1DB1,1DB2,
HACG01034230	A0A0B7AME1	gi|556097340|gb|ESO85992.1|	23	46.7811	23	88	2392.17	1DA2,1DA3,1DA5,1DA6,1DA7,1DB1,1DB4,1DB5,1DB6,1DB7,1DA4,1DA10,1DA11,1DB3,
HACG01011329	A0A0B6YPK2	gi|556097346|gb|ESO85998.1|	2	20.4724	2	2	63	1DB11,
HACG01024359	A0A0B6ZRE4	gi|556097355|gb|ESO86007.1|	7	58.9286	7	13	261.922	1DA10,1DB11,1DB13,
HACG01040062	A0A0B7B268	gi|556097528|gb|ESO86180.1|	18	61.4943	18	49	1345.47	1DA5,1DA6,1DA7,1DA9,1DB6,1DB7,1DB8,1DA8,
HACG01011200	A0A0B6YRF2	gi|556097653|gb|ESO86305.1|	4	11.3636	4	5	77.88	1DA3,1DB2,
HACG01011201	A0A0B6YQL9	gi|556097653|gb|ESO86305.1|	7	19.6185	7	7	87.22	1DB3,
HACG01041070	A0A0B7B6M7	gi|556097681|gb|ESO86333.1|	1	3.45912	2	3	51.5333	1DA3,1DA4,
HACG01026494	A0A0B6ZXK1	gi|556097683|gb|ESO86335.1|	20	56.135	20	77	1512	1DA1,1DA6,1DB1,1DB6,1DB7,1DB8,1DA3,1DA7,1DB2,1DA4,1DA5,1DA11,
HACG01018977	A0A0B6ZBL3	gi|556097689|gb|ESO86341.1|	3	16.763	3	3	45.65	1DA11,1DB11,
HACG01023039	A0A0B6ZMM9	gi|556097689|gb|ESO86341.1|	5	48.3444	5	12	262.463	1DA11,1DB12,1DB11,1DB13,
HACG01012043	A0A0B6YRQ5	gi|556097720|gb|ESO86372.1|	7	39.6552	7	27	370.497	1DA8,1DA9,1DA10,1DA11,1DA12,1DB10,1DB11,1DB12,1DB13,
HACG01047021	A0A0B7BNF5	gi|556097805|gb|ESO86457.1|	3	2.78662	3	3	64.84	1DB2,
HACG01050011	A0A0B7BWX2	gi|556098140|gb|ESO86792.1|	2	38.1579	2	8	192.78	1DA8,1DB8,1DB9,
HACG01032988	A0A0B7AGE0	gi|556098160|gb|ESO86812.1|	6	28.6195	7	13	342.934	1DA5,1DA6,1DA9,1DB7,1DB1,1DB12,
HACG01042737	A0A0B7B9L7	gi|556098160|gb|ESO86812.1|	6	29.7376	7	42	741.928	1DA4,1DA6,1DA7,1DB6,1DB9,1DA8,1DB2,1DB3,1DB4,1DB10,1DB5,1DB13,
HACG01042738	A0A0B7B992	gi|556098160|gb|ESO86812.1|	7	38.79	10	26	441.242	1DB7,1DB8,
HACG01023077	A0A0B6ZNM4	gi|556098443|gb|ESO87095.1|	5	20.2417	5	10	167.25	1DB6,1DB7,
HACG01031413	A0A0B7ABW9	gi|556098509|gb|ESO87161.1|	3	7.2	3	4	155.52	1DA5,1DB5,
HACG01016770	A0A0B6Z7E5	gi|556098530|gb|ESO87182.1|	4	22.7273	4	4	80.96	1DB6,
HACG01016581	A0A0B6Z6E7	gi|556098588|gb|ESO87240.1|	13	52.8249	13	24	472.373	1DA6,1DB6,1DB7,
HACG01004639	A0A0B6Y5T7	gi|556098590|gb|ESO87242.1|	2	24.1667	2	3	150.427	1DA8,1DB8,
HACG01029760	A0A0B7A9F1	gi|556098668|gb|ESO87320.1|	3	12.766	3	5	171.39	1DA5,1DB5,
HACG01032971	A0A0B7AIC9	gi|556098954|gb|ESO87606.1|	3	2.37028	3	4	101.21	1DB1,1DB3,
HACG01042192	A0A0B7B823	gi|556099804|gb|ESO88456.1|	5	12.806	5	8	171.66	1DA3,1DB4,1DA4,
HACG01042855	A0A0B7BC63	gi|556100167|gb|ESO88819.1|	6	68.3871	6	26	530.845	1DA10,1DB10,1DB13,1DB9,1DB11,1DB12,
HACG01006296	A0A0B6YBG0	gi|556100505|gb|ESO89157.1|	7	44.1048	7	16	406.173	1DA2,1DA3,1DA4,1DB3,1DB4,
HACG01033902	A0A0B7AJJ8	gi|556100505|gb|ESO89157.1|	16	42.029	17	42	757.809	1DA3,1DA4,1DB3,1DB4,1DA5,
HACG01044438	A0A0B7BE83	gi|556100834|gb|ESO89486.1|	9	41.5771	9	20	468.09	1DA6,1DA7,1DB7,
HACG01047676	A0A0B7BQA8	gi|556101047|gb|ESO89699.1|	5	8.3125	8	8	185.905	1DA3,1DB3,
HACG01047687	A0A0B7BNS9	gi|556101047|gb|ESO89699.1|	9	9.66272	16	26	338.224	1DA3,1DA4,1DB1,1DB2,1DB3,1DB5,
HACG01047685	A0A0B7BQX0	gi|556101047|gb|ESO89699.1|	15	17.3568	22	28	567.5	1DB1,1DB2,
HACG01019648	A0A0B6ZDA5	gi|556101117|gb|ESO89769.1|	14	62.234	14	43	542.25	1DA8,1DA9,1DB9,1DB10,1DB8,
HACG01032315	A0A0B7AGY3	gi|556101476|gb|ESO90128.1|	2	5.27607	3	5	150.09	1DA1,1DA5,1DB5,1DB1,
HACG01032313	A0A0B7AEG2	gi|556101476|gb|ESO90128.1|	4	10.3495	5	6	159.493	1DA4,1DA7,
HACG01032308	A0A0B7AGX8	gi|556101476|gb|ESO90128.1|	5	13.2353	8	15	257.55	1DA3,1DB1,1DB3,1DB2,
HACG01032318	A0A0B7ADU6	gi|556101476|gb|ESO90128.1|	9	31.9519	17	21	399.998	1DB4,
HACG01032321	A0A0B7AGL1	gi|556101476|gb|ESO90128.1|	16	28.8215	18	46	751.604	1DA3,1DA4,1DB3,1DA9,1DB9,1DB10,
HACG01032317	A0A0B7AEW7	gi|556101476|gb|ESO90128.1|	19	38.862	26	30	540.317	1DB4,
HACG01012962	A0A0B6YUP5	gi|556101526|gb|ESO90178.1|	6	26.7477	6	13	398.778	1DA7,1DB7,
HACG01016176	A0A0B6Z588	gi|556101533|gb|ESO90185.1|	2	16.7832	2	3	59.1	1DA11,1DB11,
HACG01038939	A0A0B7AXT2	gi|556101818|gb|ESO90470.1|	3	8.81057	3	4	56.94	1DB3,1DB4,
HACG01047377	A0A0B7BMU4	gi|556101906|gb|ESO90558.1|	2	5.92992	2	6	116.237	1DB1,1DB3,1DB2,
HACG01047374	A0A0B7BLN1	gi|556101906|gb|ESO90558.1|	6	15.7895	6	9	152.721	1DB3,
HACG01018828	A0A0B6ZB29	gi|556102306|gb|ESO90958.1|	2	13.615	2	2	40.62	1DB7,
HACG01028607	A0A0B7A4E4	gi|556102412|gb|ESO91064.1|	4	13.245	4	15	583.377	1DA5,1DA6,1DA8,1DB5,1DB6,1DB1,
HACG01042372	A0A0B7B8K1	gi|556102645|gb|ESO91297.1|	3	6.92308	3	7	146.169	1DA2,1DA4,1DB1,1DB2,1DB4,
HACG01044717	A0A0B7BFC4	gi|556102658|gb|ESO91310.1|	1	10.1942	2	22	456.825	1DA2,1DA3,1DA4,1DA6,1DA7,1DA8,1DB1,1DB2,1DB3,1DB4,1DB5,1DB6,1DB7,1DB8,
HACG01017922	A0A0B6Z8T7	gi|556103094|gb|ESO91746.1|	5	36.2069	5	7	164.349	1DA9,1DB10,
HACG01020663	A0A0B6ZG69	gi|556103805|gb|ESO92457.1|	9	36.4964	9	14	231.259	1DA7,1DB8,1DB7,
HACG01005397	A0A0B6Y7C6	gi|556103805|gb|ESO92457.1|	10	48.1752	10	29	690.577	1DA7,1DB1,1DB7,1DB8,1DA8,
HACG01046248	A0A0B7BJJ1	gi|556103976|gb|ESO92628.1|	3	18.9944	3	3	28.6033	1DB9,
HACG01042321	A0A0B7B8E8	gi|556104081|gb|ESO92733.1|	5	9.86745	5	7	82.5214	1DB9,1DB13,
HACG01033209	A0A0B7AGD8	gi|556104219|gb|ESO92871.1|	8	11.2864	8	8	176.44	1DB1,1DB3,
HACG01041180	A0A0B7B7H2	gi|556104876|gb|ESO93528.1|	21	66.4792	52	235	5404.99	1DA1,1DA2,1DA3,1DA6,1DB1,1DB2,1DB3,1DB4,1DA7,1DA9,1DA8,1DA10,1DB8,1DB9,1DB10,1DB13,
HACG01041185	A0A0B7B7H5	gi|556104876|gb|ESO93528.1|	23	76.378	60	255	5494.63	1DA2,1DA3,1DA4,1DB1,1DB2,1DB3,1DB4,
HACG01037802	A0A0B7AVJ5	gi|556105072|gb|ESO93724.1|	6	38.3495	6	23	504.695	1DA3,1DA4,1DA5,1DB3,1DB4,1DB5,
HACG01037803	A0A0B7AUX9	gi|556105072|gb|ESO93724.1|	7	14.0884	7	19	431.189	1DA4,1DA5,1DB4,1DB5,1DA6,1DB3,1DB7,1DB8,
HACG01036862	A0A0B7ASX1	gi|556105117|gb|ESO93769.1|	12	66.1922	16	97	1688.72	1DA1,1DA2,1DA3,1DB1,1DB2,1DB3,
HACG01041808	A0A0B7B6L0	gi|556105206|gb|ESO93858.1|	3	20	3	6	120.03	1DA8,1DB9,
HACG01024624	A0A0B6ZS89	gi|556105302|gb|ESO93954.1|	8	55.2764	8	173	3393.75	1DA1,1DA3,1DA9,1DB1,1DB2,1DB3,1DB4,1DB5,1DB7,1DB8,1DB9,1DB10,1DB13,1DA2,1DA4,1DA5,1DA7,1DA8,1DA10,1DB6,1DB11,1DB12,1DA6,
HACG01015956	A0A0B6Z4J2	gi|556105302|gb|ESO93954.1|	18	79.0274	21	296	5016.22	1DA1,1DA2,1DA3,1DA4,1DA5,1DA6,1DA7,1DA8,1DA9,1DA10,1DB1,1DB2,1DB3,1DB4,1DB5,1DB6,1DB7,1DB8,1DB9,1DB13,1DB10,1DB11,1DB12,
HACG01042750	A0A0B7BBY3	gi|556105440|gb|ESO94092.1|	5	10.509	5	9	168.914	1DA11,1DB11,1DB3,1DB4,
HACG01020835	A0A0B6ZIV3	gi|556105643|gb|ESO94295.1|	4	32.0652	4	6	121.32	1DA3,1DB1,1DB2,
HACG01043286	A0A0B7BCW5	gi|556105791|gb|ESO94443.1|	4	5.66948	4	6	103.257	1DB1,1DB2,1DB3,
HACG01033770	A0A0B7AL22	gi|556105877|gb|ESO94529.1|	2	25	2	6	172.113	1DA1,1DA2,1DB1,1DB2,
HACG01021111	A0A0B6ZJE8	gi|556106038|gb|ESO94690.1|	5	16.9336	5	6	145.92	1DB6,
HACG01023498	A0A0B6ZP77	gi|556106043|gb|ESO94695.1|	13	38.0682	13	17	314.091	1DA5,1DB6,1DB5,
HACG01025507	A0A0B6ZVK6	gi|556106190|gb|ESO94842.1|	4	19.0813	6	16	286.155	1DB5,1DB6,1DB7,
HACG01039240	A0A0B7B1W7	gi|556106190|gb|ESO94842.1|	4	32.2581	9	21	488.687	1DA7,1DB7,1DB8,
HACG01027194	A0A0B6ZZJ4	gi|556106306|gb|ESO94958.1|	13	33.2756	13	22	509.731	1DA3,1DA4,1DB4,1DB1,1DB3,
HACG01032096	A0A0B7AG03	gi|556106320|gb|ESO94972.1|	3	18.638	3	5	84.53	1DA7,1DA8,1DB8,
HACG01004479	A0A0B6Y5B2	gi|556106462|gb|ESO95114.1|	2	22.1311	2	3	97.28	1DB1,1DB2,
HACG01014604	A0A0B6YYS8	gi|556106462|gb|ESO95114.1|	2	8.75912	2	3	61.17	1DB1,1DB2,
HACG01020864	A0A0B6ZGJ1	gi|556106462|gb|ESO95114.1|	3	5.29158	3	3	145.567	1DB1,
HACG01046140	A0A0B7BLM3	gi|556106555|gb|ESO95207.1|	12	38.7128	35	57	1040.65	1DB2,1DB3,
HACG01046141	A0A0B7BKZ1	gi|556106555|gb|ESO95207.1|	23	35.1648	36	66	1146.22	1DA1,1DA3,1DB2,1DB3,1DB4,1DA4,1DB5,
HACG01046132	A0A0B7BJE5	gi|556106555|gb|ESO95207.1|	28	48.8953	43	113	2376.67	1DA1,1DA2,1DA3,1DA4,1DB2,1DB3,1DB1,
HACG01037796	A0A0B7AX67	gi|556106555|gb|ESO95207.1|	35	42.7061	52	106	1842.59	1DA1,1DA2,1DA3,1DB2,1DB3,1DB1,
HACG01032641	A0A0B7AHI1	gi|556106851|gb|ESO95503.1|	5	6.81234	5	6	180.223	1DA3,1DB3,
HACG01026739	A0A0B7A0X1	gi|556107128|gb|ESO95780.1|	2	19.7802	2	2	43.89	1DB10,1DB13,
HACG01033672	A0A0B7AIY2	gi|556107134|gb|ESO95786.1|	3	10.1852	3	4	75.6	1DA6,1DB7,1DB6,
HACG01027953	A0A0B7A1X7	gi|556107233|gb|ESO95885.1|	9	27.2727	9	33	905.365	1DA1,1DA2,1DA3,1DA4,1DA5,1DB1,1DB2,1DB3,1DB4,1DB5,
HACG01023040	A0A0B6ZQA0	gi|556107378|gb|ESO96030.1|	3	16.6667	3	4	92.62	1DB1,
HACG01031367	A0A0B7AC33	gi|556107537|gb|ESO96189.1|	10	22.1622	10	24	619.968	1DA4,1DA12,1DB1,1DB2,1DB3,1DB4,
HACG01027586	A0A0B7A322	gi|556108215|gb|ESO96867.1|	3	8.31296	3	3	74.3467	1DB7,1DB9,
HACG01043558	A0A0B7BBK8	gi|556108350|gb|ESO97002.1|	2	3.40031	2	3	69.7233	1DB3,1DB4,
HACG01031982	A0A0B7ADY7	gi|556108834|gb|ESO97486.1|	5	16.4179	5	14	238.539	1DA6,1DB6,1DB5,1DB7,1DB4,
HACG01018760	A0A0B6ZD12	gi|556108856|gb|ESO97508.1|	3	8.05369	3	3	56.4133	1DB1,1DB3,
HACG01018761	A0A0B6ZCM8	gi|556108856|gb|ESO97508.1|	3	7.53968	3	4	53.77	1DB1,1DB3,
HACG01039964	A0A0B7B0F2	gi|556108903|gb|ESO97555.1|	5	26.3158	5	9	191.06	1DA1,1DA2,1DB1,1DB2,
HACG01048213	A0A0B7BQ34	gi|556108929|gb|ESO97581.1|	3	33.9806	3	3	37.62	1DB10,
HACG01034822	A0A0B7AM26	gi|556109149|gb|ESO97801.1|	6	48.4536	7	11	224.595	1DB5,1DB6,
HACG01046753	A0A0B7BKY9	gi|556109519|gb|ESO98171.1|	9	6.86469	9	12	236.767	1DA2,1DB1,1DB2,
HACG01038024	A0A0B7AV20	gi|556109606|gb|ESO98258.1|	3	11.3889	3	8	151.765	1DA3,1DB3,
HACG01011596	A0A0B6YRT4	gi|556109892|gb|ESO98544.1|	2	11.7647	2	2	43.9	1DB3,
HACG01036269	A0A0B7AQ05	gi|556110210|gb|ESO98862.1|	4	21.659	4	4	61.06	1DB9,
HACG01041913	A0A0B7B6X8	gi|556110324|gb|ESO98976.1|	4	9.39086	4	4	42.78	1DB6,
HACG01029271	A0A0B7A807	gi|556110532|gb|ESO99183.1|	3	12.2378	3	6	136.813	1DB1,1DB2,
HACG01005210	A0A0B6Y9E6	gi|556110708|gb|ESO99359.1|	9	35.4305	9	19	297.013	1DA6,1DA11,1DA7,1DB7,1DB8,
HACG01035190	A0A0B7AQ72	gi|556110831|gb|ESO99482.1|	6	44.1558	6	49	619.138	1DA4,1DA6,1DA7,1DA8,1DA10,1DA11,1DB10,1DB11,1DB13,1DB12,1DB5,
HACG01046338	A0A0B7BJS8	gi|556110866|gb|ESO99517.1|	3	52.9248	40	177	4065.95	1DA1,1DA2,1DB1,1DB2,1DA3,1DA4,1DB5,
HACG01046340	A0A0B7BM14	gi|556110866|gb|ESO99517.1|	37	59.0762	90	456	10538.3	1DA1,1DA2,1DB1,1DB2,1DA3,1DA4,1DB3,1DB4,1DA5,1DA6,1DA8,
HACG01019348	A0A0B6ZCH1	gi|556110891|gb|ESO99542.1|	15	67.9426	15	105	1856.69	1DA1,1DA2,1DA7,1DA8,1DA9,1DB1,1DB8,1DB9,1DB10,1DA4,1DB7,1DB11,1DA5,1DA6,1DA11,
HACG01023745	A0A0B6ZS86	gi|556111239|gb|ESO99890.1|	4	12.987	4	7	206.359	1DA5,1DB6,1DB5,1DB4,
HACG01034222	A0A0B7AJA9	gi|556111273|gb|ESO99924.1|	7	35.7724	7	28	586.693	1DA6,1DA7,1DA9,1DB7,1DB9,1DB10,
HACG01033712	A0A0B7AJ18	gi|556111437|gb|ESP00089.1|	6	40.6593	10	24	461.037	1DA1,1DA2,1DA4,1DB1,1DB2,1DB4,1DA3,
HACG01025541	A0A0B6ZX48	gi|556111890|gb|ESP00542.1|	2	13.4503	2	2	57.75	1DA10,1DB13,
HACG01005614	A0A0B6Y8M1	gi|556112256|gb|ESP00908.1|	2	7.58621	2	2	52.73	1DB7,
HACG01024939	A0A0B6ZT17	gi|556112262|gb|ESP00914.1|	2	41.8182	2	2	39.44	1DB12,
HACG01023271	A0A0B6ZQM3	gi|556113049|gb|ESP01701.1|	14	36.2998	14	27	651.58	1DA3,1DA4,1DA5,1DB5,1DB4,
HACG01027983	A0A0B7A206	gi|556113060|gb|ESP01712.1|	2	2.06084	2	2	31.89	1DB3,1DB11,
HACG01039786	A0A0B7B0U4	gi|556113064|gb|ESP01716.1|	3	12.0482	3	4	127.28	1DB1,1DB2,
HACG01027196	A0A0B7A1T4	gi|556113071|gb|ESP01723.1|	10	29.9213	10	16	354.055	1DA5,1DA6,1DB6,1DB7,
HACG01034270	A0A0B7AMH6	gi|556113321|gb|ESP01973.1|	9	32.1622	9	18	175.028	1DB1,1DB2,1DB6,1DB4,1DB7,
HACG01014512	A0A0B6YZ12	gi|556113526|gb|ESP02178.1|	29	61.5137	29	75	1396.85	1DA3,1DA4,1DB4,1DB3,1DB1,
HACG01027008	A0A0B6ZZ42	gi|556113650|gb|ESP02302.1|	3	36.6906	3	3	109.373	1DB8,
HACG01027524	A0A0B7A0H1	gi|556113679|gb|ESP02331.1|	4	27.0968	4	6	113	1DB10,1DB13,
HACG01033368	A0A0B7AHD5	gi|556113946|gb|ESP02598.1|	25	46.3047	25	117	2547.91	1DA1,1DA2,1DA3,1DB1,1DB3,1DB4,1DA4,1DA5,1DA6,1DA7,1DA8,1DB2,1DA9,1DA10,
HACG01030833	A0A0B7AA81	gi|556113964|gb|ESP02616.1|	14	31.2102	14	33	602.419	1DA3,1DA4,1DA5,1DA6,1DA7,1DA8,1DB1,1DB5,1DB6,1DB7,1DB4,
HACG01005691	A0A0B6Y9Q8	gi|556114019|gb|ESP02671.1|	4	17.0124	4	4	43.18	1DB8,
HACG01021921	A0A0B6ZLN1	gi|556114028|gb|ESP02680.1|	4	33	4	4	95.48	1DB9,
HACG01042230	A0A0B7BAJ0	gi|556114329|gb|ESP02981.1|	4	28.2486	4	8	109.08	1DA9,1DB9,1DB10,
HACG01042918	A0A0B7B9R7	gi|556114369|gb|ESP03021.1|	6	6.16967	6	8	190.33	1DA3,1DB3,1DB2,
HACG01018007	A0A0B6Z929	gi|556114398|gb|ESP03050.1|	2	13.6752	2	4	198.4	1DA8,1DB9,
HACG01027136	A0A0B7A1N5	gi|556114460|gb|ESP03112.1|	7	30.6773	7	13	215.468	1DA8,1DB8,1DB9,
HACG01024031	A0A0B6ZSU8	gi|556114539|gb|ESP03191.1|	9	11.566	9	13	252.198	1DA2,1DB2,1DB1,
HACG01024029	A0A0B6ZT35	gi|556114539|gb|ESP03191.1|	14	32.0717	14	29	462.578	1DA1,1DA2,1DA3,1DA4,1DB1,1DB2,1DB3,
HACG01043410	A0A0B7BDL7	gi|556114587|gb|ESP03239.1|	3	7.52688	3	3	30.3867	1DB4,
HACG01028707	A0A0B7A460	gi|556114716|gb|ESP03368.1|	2	3.56564	2	2	40.3	1DB4,
HACG01032454	A0A0B7AE92	gi|556115870|gb|ESP04522.1|	2	6.51558	2	4	114.63	1DA6,1DB6,
HACG01039396	A0A0B7B1R5	gi|556116184|gb|ESP04836.1|	11	54.4643	11	27	728.653	1DA1,1DA2,1DA3,1DB1,1DB2,1DB3,1DB4,
HACG01030793	A0A0B7AA42	gi|556116273|gb|ESP04925.1|	2	9.1954	2	2	44.07	1DB9,
HACG01026291	A0A0B6ZXT1	gi|556116273|gb|ESP04925.1|	3	24.0909	3	3	72.0067	1DA8,1DB8,
HACG01042137	A0A0B7B7Z1	gi|556116283|gb|ESP04935.1|	7	16.6927	8	18	339.353	1DB1,1DB3,1DB4,1DB2,
HACG01002171	A0A0B6XZT4	gi|556116375|gb|ESP05027.1|	5	22.4658	7	11	201.795	1DA6,1DB5,1DB6,
HACG01026667	A0A0B6ZYX8	gi|556116376|gb|ESP05028.1|	13	43.8356	15	30	628.367	1DA4,1DA5,1DA6,1DB6,1DB7,1DA9,1DB1,1DB5,
HACG01038289	A0A0B7AVV0	gi|556116427|gb|ESP05079.1|	10	42.638	13	36	695.817	1DA5,1DA6,1DB6,1DA9,1DA12,1DB10,1DB1,1DB7,1DB8,1DB9,1DB13,
HACG01011491	A0A0B6YRF5	gi|556116427|gb|ESP05079.1|	12	50	15	58	1156.73	1DA4,1DA5,1DA6,1DB6,1DA7,1DA8,1DA9,1DA10,1DB7,1DB8,1DB9,1DB10,1DA12,1DA11,1DB13,
HACG01011547	A0A0B6YQJ8	gi|556116442|gb|ESP05094.1|	4	47.9675	4	11	402.318	1DA6,1DB6,1DB1,1DB5,1DB7,
HACG01036889	A0A0B7ARU3	gi|556116519|gb|ESP05171.1|	10	52.6042	10	34	596.604	1DA9,1DB10,1DB13,
HACG01040301	A0A0B7B2S2	gi|556729406|ref|XP_005960416.1|	1	60.7383	11	25	747.22	1DA5,
HACG01035526	A0A0B7AQX0	gi|560896664|ref|XP_006174798.1|	10	27.957	10	20	450.36	1DA4,1DA5,1DA6,1DB1,1DB4,1DB5,1DB6,
HACG01026540	A0A0B7A0C0	gi|564743500|gb|AHC02701.1|	12	81.1798	33	148	2593.95	1DA1,1DA10,1DA11,1DB2,1DB6,1DB9,1DB10,1DB11,1DB13,
HACG01012787	A0A0B6YU61	gi|56792845|gb|AAW30622.1|	1	41.9847	4	5	137.2	1DB5,
HACG01006430	A0A0B6YCS5	gi|568301578|gb|ETN87131.1|	7	25.1323	7	7	137.874	1DB4,
HACG01005576	A0A0B6Y9F6	gi|568939963|ref|XP_006505278.1|	4	42.3237	4	10	259.05	1DA8,1DB9,
HACG01031797	A0A0B7ADC6	gi|576693750|gb|EUB57355.1|	5	40.1408	5	11	154.095	1DA11,1DB11,1DB12,
HACG01022028	A0A0B6ZK59	gi|576693750|gb|EUB57355.1|	6	39.4366	6	19	241.745	1DA11,1DB11,1DB12,
HACG01015201	A0A0B6Z2B0	gi|577029901|gb|AHH81785.1|	2	73.8095	3	9	278.928	1DB5,
HACG01044413	A0A0B7BE53	gi|577029907|gb|AHH81788.1|	9	58.156	9	19	275.354	1DA10,1DB13,
HACG01025057	A0A0B6ZUB3	gi|577029965|gb|AHH81817.1|	3	40.4762	3	5	61.28	1DA5,1DA6,1DB6,
HACG01032979	A0A0B7AFP2	gi|583994656|ref|XP_006792469.1|	3	28.2353	3	32	435.609	1DA4,1DA5,1DA7,1DA8,1DA9,1DA10,1DA12,1DB1,1DB7,1DB8,1DB9,1DB10,1DB11,1DB12,1DB13,
HACG01022501	A0A0B6ZND3	gi|585188|sp|P38411.1|GNAQ_LYMST	2	24.8175	2	2	48.87	1DB1,
HACG01041447	A0A0B7B4M7	gi|585193165|ref|XP_006747803.1|	16	46.3221	18	99	1856.46	1DA1,1DA2,1DA4,1DB1,1DB2,1DB3,1DB4,1DB5,1DA3,1DA5,1DA6,1DA8,1DA9,1DB6,
HACG01041271	A0A0B7B756	gi|585719304|ref|XP_006826038.1|	1	39.2217	64	121	2419.91	1DB1,1DB2,
HACG01041270	A0A0B7B7P5	gi|585719304|ref|XP_006826038.1|	23	42.3428	69	165	3914.91	1DA1,1DA2,1DB1,1DB2,1DA3,1DA6,1DB3,1DA4,1DA5,
HACG01002192	A0A0B6XYA9	gi|589107123|ref|XP_006965584.1|	4	42.1488	4	9	287.689	1DA7,1DB7,1DB8,
HACG01012298	A0A0B6YSF4	gi|597788484|ref|XP_007257657.1|	9	34.7181	10	17	111.532	1DA6,1DB6,1DB7,
HACG01013990	A0A0B6YZD9	gi|597867153|gb|EYC16545.1|	1	17.2662	2	5	79.48	1DB5,
HACG01016354	A0A0B6Z3L1	gi|602626279|ref|XP_007420100.1|	11	74.8466	11	92	1724.4	1DA4,1DA5,1DA7,1DA8,1DA9,1DA10,1DA11,1DA12,1DB1,1DB9,1DB10,1DB11,1DB12,1DB13,
HACG01021581	A0A0B6ZKU6	gi|602642710|ref|XP_007428140.1|	3	48.913	3	6	152.903	1DA12,1DB11,1DB12,
HACG01038481	A0A0B7AZ60	gi|608090766|gb|EZG30020.1|	9	74.026	9	42	1408	1DA1,1DA2,1DA3,1DA4,1DA5,1DA6,1DA7,1DA10,1DB2,1DB4,1DB5,1DB6,1DB7,1DB1,1DB3,
HACG01023086	A0A0B6ZQ71	gi|608096069|gb|EZG34785.1|	3	16.5563	3	13	301.567	1DA10,1DB1,1DB10,1DB13,1DB9,1DB8,
HACG01026729	A0A0B6ZY83	gi|617524151|ref|XP_007544814.1|	7	34.5622	7	15	333.423	1DA8,1DA9,1DB10,1DB13,
HACG01044156	A0A0B7BFF0	gi|619323847|gb|AHY00642.1|	4	9.97963	4	4	65.41	1DB5,
HACG01027770	A0A0B7A3T4	gi|620958561|ref|XP_007664363.1|	14	75.9259	14	61	1074.23	1DA1,1DA4,1DA5,1DA6,1DB4,1DA2,1DA3,1DB1,1DB2,1DB5,1DB7,1DB3,
HACG01015203	A0A0B6Z0M5	gi|625230674|ref|XP_007606483.1|	1	55.6818	4	15	248.317	1DA4,
HACG01029893	A0A0B7A7H9	gi|632935059|ref|XP_007887607.1|	2	30.303	2	2	32.15	1DB1,
HACG01029890	A0A0B7A9U1	gi|632935059|ref|XP_007887607.1|	3	14.0078	3	6	123.953	1DA2,1DB1,1DB2,
HACG01027658	A0A0B7A130	gi|632946707|ref|XP_007888691.1|	5	18.9815	5	8	192.245	1DA5,1DA6,1DB6,
HACG01045280	A0A0B7BJ11	gi|632953883|ref|XP_007892665.1|	5	10.9955	5	7	282.39	1DB3,1DB4,
HACG01034107	A0A0B7AK78	gi|632968605|ref|XP_007900618.1|	2	18.4	2	2	57.86	1DB13,
HACG01024674	A0A0B6ZSC8	gi|635065029|ref|XP_008001282.1|	3	61.5385	4	27	325.439	1DA6,1DA8,1DA9,1DA10,1DB10,1DB13,1DB1,1DB11,
HACG01050333	A0A0B7BW07	gi|637321743|ref|XP_008112910.1|	2	28.2051	2	3	83.92	1DA1,1DA2,1DB1,
HACG01025820	A0A0B6ZY45	gi|639127132|gb|AIA24462.1|	5	39.3939	5	6	163.723	1DA11,1DB12,1DB11,
HACG01049514	A0A0B7BT39	gi|646714599|gb|KDR18512.1|	7	64.0449	7	19	351.098	1DB11,1DB12,
HACG01005604	A0A0B6Y8L4	gi|646720608|gb|KDR22269.1|	4	45	4	9	211.931	1DA11,1DB11,1DB12,1DB13,
HACG01041118	A0A0B7B4Q0	gi|6492342|gb|AAF14287.1|AF182339_1	3	6.81818	3	3	63.04	1DB4,
HACG01027179	A0A0B6ZZI1	gi|655453820|ref|WP_028837045.1|	5	17.5159	5	5	84.78	1DB7,
HACG01046628	A0A0B7BJG3	gi|655453820|ref|WP_028837045.1|	8	37.7926	8	16	265.923	1DA1,1DA2,1DB1,1DB2,1DB7,1DA7,
HACG01026476	A0A0B6ZZT5	gi|66361226|pdb|1YX5|B	5	42.7673	5	22	233.237	1DA11,1DB10,1DB11,1DB13,
HACG01031074	A0A0B7AAF2	gi|6682319|emb|CAB64662.1|	45	66.8874	68	713	17929.9	1DA1,1DA2,1DB2,1DA3,1DA4,1DA5,1DA6,1DB1,1DB3,1DB9,1DB4,1DA9,1DB8,1DB11,1DB12,1DA7,1DB5,1DB10,
HACG01049895	A0A0B7BX34	gi|67005832|gb|AAN31641.3|AF486290_1	3	10.3352	3	3	85.57	1DB6,
HACG01033073	A0A0B7AG33	gi|67989656|gb|AAY84715.1|	2	6.98925	2	7	292.799	1DA2,1DA5,1DB1,1DB2,1DB5,1DB6,
HACG01038089	A0A0B7AVB2	gi|68272049|gb|AAY89300.1|	4	66.1458	10	53	855.699	1DA7,1DA8,1DA9,1DA10,1DB8,1DB9,1DB10,1DB11,1DB13,1DA11,
HACG01038642	A0A0B7AY06	gi|68533593|gb|AAH98579.1|	3	6.34921	3	3	87.98	1DB2,
HACG01002418	A0A0B6XZH1	gi|71040619|dbj|BAE16013.1|	4	26.6355	4	16	572.945	1DA8,1DA9,1DB1,1DB2,1DB3,1DB8,1DB9,1DB10,
HACG01044079	A0A0B7BCB5	gi|71726729|gb|AAZ39528.1|	5	75.9516	57	349	6335.33	1DA4,1DB4,1DB5,1DB9,1DA12,1DB10,1DB11,1DB12,1DB13,
HACG01049650	A0A0B7BWI8	gi|71726733|gb|AAZ39530.1|	2	45.2174	2	13	340.253	1DA10,1DA11,1DB11,1DB12,1DB13,
HACG01041331	A0A0B7B584	gi|72084055|ref|XP_790644.1|	3	11.3514	3	3	91.7367	1DA6,1DB7,
HACG01003507	A0A0B6Y272	gi|72113881|ref|XP_787111.1|	6	81.7204	6	16	438.277	1DA12,1DB11,1DB12,
HACG01042503	A0A0B7B8N4	gi|73695954|gb|AAZ80783.1|	29	66.4286	29	752	17214.9	1DA1,1DA2,1DA3,1DA4,1DA5,1DA6,1DA7,1DA8,1DA9,1DA10,1DB1,1DB4,1DB5,1DB6,1DB7,1DB8,1DA11,1DA12,1DB3,1DB9,1DB10,1DB2,1DB12,1DB11,1DB13,
HACG01034081	A0A0B7ALX2	gi|74137592|dbj|BAE35828.1|	7	29.7297	7	19	481.483	1DA3,1DB3,1DB1,1DB2,
HACG01042692	A0A0B7B9H6	gi|74912853|sp|Q6QUW1.1|RGP51_LYMST	24	70.4444	31	199	3590.05	1DA4,1DA5,1DA6,1DB1,1DB2,1DB3,1DB4,1DB5,1DB6,
HACG01034752	A0A0B7AL94	gi|773571|emb|CAA60122.1|	1	7.24638	2	2	108.75	1DA4,
HACG01047329	A0A0B7BLH7	gi|773571|emb|CAA60122.1|	5	47.3684	5	8	203.22	1DA4,1DB4,1DA8,
HACG01041380	A0A0B7B7Z5	gi|773571|emb|CAA60122.1|	8	15.6746	8	9	153.433	1DA5,1DB5,
HACG01034754	A0A0B7ANP2	gi|773571|emb|CAA60122.1|	12	42.6752	19	21	312.772	1DB4,
HACG01041381	A0A0B7B7F2	gi|773571|emb|CAA60122.1|	19	45.2532	26	36	744.439	1DA4,1DB4,
HACG01034730	A0A0B7ANV9	gi|77628181|gb|ABB00056.1|	2	71.0145	3	36	687.528	1DA7,1DB1,1DB7,1DB8,1DB9,
HACG01044081	A0A0B7BF93	gi|829207|emb|CAA39415.1|	1	75.6637	39	53	736.724	1DB6,
HACG01005310	A0A0B6Y9P9	gi|85362949|gb|ABC69854.1|	2	27.7778	2	9	206.486	1DA11,1DB10,1DB11,1DB12,1DB13,
HACG01016007	A0A0B6Z3C5	gi|85362949|gb|ABC69854.1|	5	44.7154	5	36	930.607	1DA1,1DA2,1DB1,1DB10,1DB11,1DB13,1DA7,1DA8,1DA9,1DA10,1DA11,1DA12,1DB2,1DB7,1DB8,1DB9,1DB12,
HACG01005064	A0A0B6Y739	gi|85753308|gb|AAG49533.3|	1	20	4	19	263.976	1DA5,1DB4,1DB5,
HACG01005395	A0A0B6Y9X2	gi|91077014|ref|XP_966444.1|	6	17.2185	6	10	177.62	1DA4,1DA5,1DB4,1DB5,
HACG01002433	A0A0B6XZI4	gi|91079426|ref|XP_967808.1|	2	12.5	2	5	70.05	1DB11,1DB12,
HACG01021703	A0A0B6ZJ78	gi|93209532|gb|ABF00124.1|	3	26.7974	3	79	1692.34	1DA2,1DA3,1DA4,1DA6,1DA7,1DA8,1DA9,1DA10,1DA11,1DA12,1DB1,1DB2,1DB3,1DB4,1DB7,1DB8,1DB9,1DB10,1DB11,1DB12,1DB13,
HACG01021068	A0A0B6ZHG1	gi|93209532|gb|ABF00124.1|	5	47.8261	5	125	3291.02	1DA1,1DA3,1DA6,1DA8,1DA9,1DA10,1DA11,1DA12,1DB1,1DB8,1DB9,1DB10,1DB11,1DB12,1DA2,1DA4,1DA5,1DA7,1DB2,1DB4,1DB5,1DB7,1DB13,1DB3,
HACG01023782	A0A0B6ZQH3	gi|994895|gb|AAB34494.1|	10	40.1639	12	26	556.821	1DA1,1DA6,1DA8,1DB2,1DB8,
HACG01042313	A0A0B7B827	Unknown	1	7.87037	2	2	33.12	1DB8,
HACG01044714	A0A0B7BE68	Unknown	1	11.6505	2	3	88.1633	1DA6,
HACG01002111	A0A0B6XY56	Unknown	2	40.5797	2	6	109.187	1DB2,1DB4,1DB11,1DB13,
HACG01005312	A0A0B6Y748	Unknown	2	13.8462	2	2	36.42	1DB11,
HACG01026042	A0A0B6ZX56	Unknown	2	5.42169	2	4	96.97	1DB3,
HACG01027525	A0A0B7A2T2	Unknown	2	49.505	2	3	48.1633	1DA4,1DA5,1DB5,
HACG01030091	A0A0B7AAE4	Unknown	2	31.4607	2	15	358.407	1DA3,1DA5,1DB1,1DB2,1DB3,1DB5,1DB7,1DB8,1DB11,1DB12,
HACG01032016	A0A0B7ACZ5	Unknown	2	15.3846	2	7	99.5771	1DB11,1DB12,
HACG01033415	A0A0B7AK29	Unknown	2	29.8851	2	4	38.81	1DA12,1DB11,1DB12,
HACG01035358	A0A0B7AN13	Unknown	2	11.9691	2	2	75.45	1DB9,
HACG01036973	A0A0B7AVD5	Unknown	2	25.4098	2	4	115.87	1DA11,1DB11,1DB12,
HACG01044893	A0A0B7BFI7	Unknown	2	2.04678	2	3	32.1533	1DB1,1DB2,
HACG01047662	A0A0B7BNQ7	Unknown	2	7.69231	2	2	43.72	1DB2,
HACG01052636	A0A0B7C2V6	Unknown	2	33.3333	2	2	36.54	1DB4,
HACG01044718	A0A0B7BF15	Unknown	2	37.037	3	12	207.043	1DA4,1DA5,1DA6,1DA7,1DA8,1DB6,1DB7,1DB8,
HACG01044724	A0A0B7BE79	Unknown	2	50	3	18	271.488	1DA6,1DA7,1DB6,1DB7,1DB8,
HACG01044715	A0A0B7BHF6	Unknown	2	32.3383	5	17	363.91	1DA7,1DB7,1DB8,
HACG01021092	A0A0B6ZHY7	Unknown	3	17.2589	3	3	44.05	1DB7,1DB8,
HACG01023330	A0A0B6ZR28	Unknown	3	25.2427	3	4	76.77	1DA12,1DB12,
HACG01028841	A0A0B7A6R5	Unknown	3	31.9149	3	7	116.386	1DA10,1DB10,1DB13,
HACG01030092	A0A0B7A8J9	Unknown	3	29.6296	3	13	381.198	1DA1,1DA2,1DA4,1DB4,
HACG01030913	A0A0B7AAF1	Unknown	3	33.3333	3	6	124.72	1DA1,1DA2,1DA3,1DB1,1DB2,
HACG01044700	A0A0B7BHE4	Unknown	3	19.4805	3	6	116.91	1DB7,1DB9,1DB8,
HACG01044706	A0A0B7BGZ4	Unknown	3	22.0513	3	8	220.22	1DA7,1DA8,1DB8,
HACG01044707	A0A0B7BFB4	Unknown	3	28.7582	3	10	274.15	1DA6,1DA7,1DA8,
HACG01019435	A0A0B6ZEY8	Unknown	3	43.5754	14	37	615.825	1DB4,1DB5,
HACG01019436	A0A0B6ZEL1	Unknown	3	55.102	15	44	759.805	1DB5,1DB6,
HACG01005318	A0A0B6Y7S7	Unknown	4	16.2921	4	4	136.98	1DB3,
HACG01023202	A0A0B6ZNW9	Unknown	4	21.0256	4	32	372.527	1DA1,1DA2,1DA3,1DA4,1DA8,1DB1,1DB2,1DB3,1DB4,
HACG01026996	A0A0B7A183	Unknown	4	21.2389	4	8	91.565	1DB7,1DB9,1DB8,
HACG01028842	A0A0B7A4Y5	Unknown	4	29.3706	4	19	447.401	1DA10,1DA11,1DA12,1DB11,1DB12,1DB13,
HACG01033499	A0A0B7AKC1	Unknown	4	8.22898	4	10	163.69	1DA1,1DA3,1DB1,1DB2,1DB3,
[truncated: 12 more rows]
