# Supplementary material for: Transcriptomic and Proteomic Analysis of Arion vulgaris—Proteins for Probably Successful Survival Strategies?
Source: PLoS One. 2016 Mar 17;11(3):e0150614. doi: 10.1371/journal.pone.0150614 (PMC4795696; doi:10.1371/journal.pone.0150614)
Supplement: S5 Table — (XLSX) [file pone.0150614.s005.xlsx]

## Sheet: Abbreviation
Abbreviations used for protein identification
acc_EMBL	EMBL accession number
prot_acc UniProt	UniProt accesion number
prot_hit	hit in the NCBI nr database, cut off value of 1E-6
prot_hit_desc	hit description
status	complete - as the entire CDS from the initial ATG to the STOP codon was represented
evidence	T-transcriptomic level, P-protein level

## Sheet: lectins
acc_ EMBL	prot_acc UniProt	prot_hit	prot_hit_desc	status	evidence
HACG01038485	A0A0B7AZQ2	gi|524881817|ref|XP_005097558.1|	PREDICTED: calnexin-like isoform X1 [Aplysia californica]	complete	T,P	calnexin
HACG01038479	A0A0B7AWH4	gi|524881819|ref|XP_005097559.1|	PREDICTED: calnexin-like isoform X2 [Aplysia californica]	complete	T,P	calnexin
HACG01022455	A0A0B6ZNL6	gi|524881819|ref|XP_005097559.1|	PREDICTED: calnexin-like isoform X2 [Aplysia californica]	incomplete	T	calnexin
HACG01022456	A0A0B6ZN75	gi|524881819|ref|XP_005097559.1|	PREDICTED: calnexin-like isoform X2 [Aplysia californica]	incomplete	T	calnexin
HACG01041705	A0A0B7B6R1	gi|2073142|dbj|BAA19861.1|	Incilarin A [Meghimatium fruhstorferi]	complete	T	C-type lectin
HACG01041708	A0A0B7B6E0	gi|2073142|dbj|BAA19861.1|	Incilarin A [Meghimatium fruhstorferi]	complete	T	C-type lectin
HACG01025479	A0A0B6ZUN1	gi|2073146|dbj|BAA19863.1|	Incilarin C [Meghimatium fruhstorferi]	complete	T	C-type lectin
HACG01023156	A0A0B6ZQC8	gi|405959962|gb|EKC25931.1|	hypothetical protein CGI_10009560 [Crassostrea gigas]	complete	T	C-type lectin
HACG01012066	A0A0B6YT51	gi|524894115|ref|XP_005103561.1|	PREDICTED: uncharacterized protein LOC101845181 [Aplysia californica]	complete	T	C-type lectin
HACG01039206	A0A0B7B1A1	gi|524906450|ref|XP_005108528.1|	PREDICTED: secretory phospholipase A2 receptor-like [Aplysia californica]	complete	T	C-type lectin
HACG01042359	A0A0B7B7A0	gi|524907181|ref|XP_005108715.1|	PREDICTED: uncharacterized protein LOC101848467 [Aplysia californica]	complete	T	C-type lectin
HACG01033454	A0A0B7AH34	gi|556103033|gb|ESO91685.1|	hypothetical protein LOTGIDRAFT_163414 [Lottia gigantea]	complete	T	C-type lectin
HACG01031796	A0A0B7AF33	gi|556111065|gb|ESO99716.1|	hypothetical protein LOTGIDRAFT_238723 [Lottia gigantea]	complete	T	C-type lectin
HACG01027342	A0A0B7A018	gi|126697408|gb|ABO26661.1|	incilarin A [Haliotis discus discus]	complete	T,P	C-type lectin
HACG01018944	A0A0B6ZB52	gi|2073142|dbj|BAA19861.1|	Incilarin A [Meghimatium fruhstorferi]	complete	T,P	C-type lectin
HACG01023930	A0A0B6ZSS2	gi|2073142|dbj|BAA19861.1|	Incilarin A [Meghimatium fruhstorferi]	complete	T,P	C-type lectin
HACG01024954	A0A0B6ZT36	gi|2073142|dbj|BAA19861.1|	Incilarin A [Meghimatium fruhstorferi]	complete	T,P	C-type lectin
HACG01032978	A0A0B7AGC8	gi|2073142|dbj|BAA19861.1|	Incilarin A [Meghimatium fruhstorferi]	complete	T,P	C-type lectin
HACG01005349	A0A0B6Y7S8	gi|2073142|dbj|BAA19861.1|	Incilarin A [Meghimatium fruhstorferi]	complete	T,P	C-type lectin
HACG01024914	A0A0B6ZSZ0	gi|405968748|gb|EKC33788.1|	Aggrecan core protein [Crassostrea gigas]	complete	T,P	C-type lectin
HACG01023998	A0A0B6ZQL8	gi|524890590|ref|XP_005101839.1|	PREDICTED: cell wall protein DAN4-like [Aplysia californica]	complete	T,P	C-type lectin
HACG01041706	A0A0B7B8E9	gi|2073142|dbj|BAA19861.1|	Incilarin A [Meghimatium fruhstorferi]	complete	T,P	C-type lectin
HACG01043660	A0A0B7BEF3	gi|126697272|gb|ABO26593.1|	putative perlucin 4 [Haliotis discus discus]	incomplete	T	C-type lectin
HACG01043654	A0A0B7BB05	gi|126697272|gb|ABO26593.1|	putative perlucin 4 [Haliotis discus discus]	incomplete	T	C-type lectin
HACG01018124	A0A0B6Z8S9	gi|157694790|gb|ABV66064.1|	type II antifreeze protein [Lates calcarifer]	incomplete	T	C-type lectin
HACG01002615	A0A0B6Y1V4	gi|2073142|dbj|BAA19861.1|	Incilarin A [Meghimatium fruhstorferi]	incomplete	T	C-type lectin
HACG01032829	A0A0B7AF96	gi|405959962|gb|EKC25931.1|	hypothetical protein CGI_10009560 [Crassostrea gigas]	incomplete	T	C-type lectin
HACG01043657	A0A0B7BCB7	gi|405972881|gb|EKC37628.1|	Low affinity immunoglobulin epsilon Fc receptor [Crassostrea gigas]	incomplete	T	C-type lectin
HACG01000048	A0A0B6XST0	gi|524889813|ref|XP_005101458.1|	PREDICTED: macrophage mannose receptor 1-like [Aplysia californica]	incomplete	T	C-type lectin
HACG01023404	A0A0B6ZNL8	gi|524889950|ref|XP_005101525.1|	PREDICTED: FRAS1-related extracellular matrix protein 1-like [Aplysia californica]	incomplete	T	C-type lectin
HACG01024576	A0A0B6ZUF6	gi|524889950|ref|XP_005101525.1|	PREDICTED: FRAS1-related extracellular matrix protein 1-like [Aplysia californica]	incomplete	T	C-type lectin
HACG01027049	A0A0B6ZZ24	gi|524890590|ref|XP_005101839.1|	PREDICTED: cell wall protein DAN4-like [Aplysia californica]	incomplete	T	C-type lectin
HACG01016037	A0A0B6Z3G1	gi|524894115|ref|XP_005103561.1|	PREDICTED: uncharacterized protein LOC101845181 [Aplysia californica]	incomplete	T	C-type lectin
HACG01027044	A0A0B6ZZ18	gi|524895689|ref|XP_005104326.1|	PREDICTED: uncharacterized protein LOC101845349 [Aplysia californica]	incomplete	T	C-type lectin
HACG01042362	A0A0B7B8J1	gi|524907181|ref|XP_005108715.1|	PREDICTED: uncharacterized protein LOC101848467 [Aplysia californica]	incomplete	T	C-type lectin
HACG01050801	A0A0B7BZ56	gi|546241983|gb|AGW83938.1|	vitelline coat lysin M3, partial [Mytilus trossulus]	incomplete	T	C-type lectin
HACG01051939	A0A0B7C2Z1			incomplete	T	C-type lectin
HACG01005620	A0A0B6YAM0	gi|226731904|gb|ACO82046.1|	C-type lectin 13 [Perca flavescens]	incomplete	T	C-type lectin
HACG01053140	A0A0B7C5W7	gi|617468332|ref|XP_007574500.1|	PREDICTED: galactose-specific lectin nattectin-like, partial [Poecilia formosa]	incomplete	T	C-type lectin
HACG01043659	A0A0B7BB09	gi|126697272|gb|ABO26593.1|	putative perlucin 4 [Haliotis discus discus]	incomplete	T,P	C-type lectin
HACG01027153	A0A0B6ZZL1	gi|2073146|dbj|BAA19863.1|	Incilarin C [Meghimatium fruhstorferi]	incomplete	T,P	C-type lectin
HACG01043652	A0A0B7BCB3	gi|405972881|gb|EKC37628.1|	Low affinity immunoglobulin epsilon Fc receptor [Crassostrea gigas]	incomplete	T,P	C-type lectin
HACG01015572	A0A0B6Z234	gi|524899021|ref|XP_005105951.1|	PREDICTED: uncharacterized protein LOC101860995 isoform X1 [Aplysia californica]	incomplete	T,P	C-type lectin
HACG01049110	A0A0B7BV24	gi|524907181|ref|XP_005108715.1|	PREDICTED: uncharacterized protein LOC101848467 [Aplysia californica]	incomplete	T,P	C-type lectin
HACG01042360	A0A0B7BAU0	gi|524864072|ref|XP_005088874.1|	PREDICTED: uncharacterized protein LOC101856539 [Aplysia californica]	incomplete	T	C-type lectin
HACG01042363	A0A0B7B877	gi|524907181|ref|XP_005108715.1|	PREDICTED: uncharacterized protein LOC101848467 [Aplysia californica]	incomplete	T	C-type lectin
HACG01028698	A0A0B7A451	gi|556100655|gb|ESO89307.1|	hypothetical protein LOTGIDRAFT_229175 [Lottia gigantea]	complete	T	C-type lectin
HACG01045095	A0A0B7BIK3	gi|556097543|gb|ESO86195.1|	hypothetical protein LOTGIDRAFT_235549 [Lottia gigantea]	complete	T	C-type lectin
HACG01045098	A0A0B7BG93	gi|556097543|gb|ESO86195.1|	hypothetical protein LOTGIDRAFT_235549 [Lottia gigantea]	complete	T	C-type lectin
HACG01045096	A0A0B7BI33	gi|524870399|ref|XP_005091984.1|	PREDICTED: macrophage mannose receptor 1-like [Aplysia californica]	incomplete	T	C-type lectin
HACG01034537	A0A0B7ALG2	gi|556103033|gb|ESO91685.1|	hypothetical protein LOTGIDRAFT_163414 [Lottia gigantea]	complete	T	C-type lectin
HACG01025220	A0A0B6ZWE7	gi|152032020|gb|ABS28869.1|	tandem repeat galectin [Biomphalaria glabrata]	complete	T	galectin
HACG01047352	A0A0B7BMS3	gi|524891001|ref|XP_005102040.1|	PREDICTED: galectin-4-like isoform X3 [Aplysia californica]	complete	T	galectin
HACG01047353	A0A0B7BMN5	gi|524891001|ref|XP_005102040.1|	PREDICTED: galectin-4-like isoform X3 [Aplysia californica]	complete	T	galectin
HACG01002021	A0A0B6XZD7	gi|524891001|ref|XP_005102040.1|	PREDICTED: galectin-4-like isoform X3 [Aplysia californica]	complete	T	galectin
HACG01037656	A0A0B7AWV4	gi|152032020|gb|ABS28869.1|	tandem repeat galectin [Biomphalaria glabrata]	complete	T,P	galectin
HACG01052261	A0A0B7C1Q6	gi|402580802|gb|EJW74751.1|	galectin, partial [Wuchereria bancrofti]	incomplete	T	galectin
HACG01000759	A0A0B6XUN7	gi|560121553|emb|CDJ93815.1|	Galectin domain containing protein, partial [Haemonchus contortus]	incomplete	T	galectin
HACG01010081	A0A0B6YMG7	gi|152032020|gb|ABS28869.1|	tandem repeat galectin [Biomphalaria glabrata]	incomplete	T	galectin
HACG01005012	A0A0B6Y6D7	gi|568300466|gb|ETN86155.1|	galactoside-binding lectin [Necator americanus]	incomplete	T	galectin
HACG01013023	A0A0B6YUG8	gi|405976166|gb|EKC40683.1|	Cubilin [Crassostrea gigas]	incomplete	T	galectin
HACG01039153	A0A0B7AZ29	gi|85362949|gb|ABC69854.1|	agglutinin [Helix pomatia]	complete	T	H-type lectin
HACG01041396	A0A0B7B7G5	gi|104162064|emb|CAK19329.1|	CHAII like protein precursor [Cepaea hortensis]	complete	T,P	H-type lectin
HACG01016007	A0A0B6Z3C5	gi|85362949|gb|ABC69854.1|	agglutinin [Helix pomatia]	complete	T,P	H-type lectin
HACG01005310	A0A0B6Y9P9	gi|85362949|gb|ABC69854.1|	agglutinin [Helix pomatia]	complete	T,P	H-type lectin
HACG01029986	A0A0B7AA27			complete	T,P	H-type lectin
HACG01043414	A0A0B7BA86			complete	T,P	H-type lectin
HACG01039151	A0A0B7B152	gi|109157294|pdb|2CE6|A	Chain A, Structure Of Helix Pomatia Agglutinin With No Ligands	incomplete	T	H-type lectin
HACG01039152	A0A0B7AZJ1	gi|85362949|gb|ABC69854.1|	agglutinin [Helix pomatia]	incomplete	T	H-type lectin
HACG01039154	A0A0B7AYC4	gi|85362949|gb|ABC69854.1|	agglutinin [Helix pomatia]	incomplete	T	H-type lectin
HACG01026939	A0A0B6ZYQ3			incomplete	T	H-type lectin
HACG01031741	A0A0B7AEX4	gi|109157294|pdb|2CE6|A	Chain A, Structure Of Helix Pomatia Agglutinin With No Ligands	incomplete	T,P	H-type lectin
HACG01031738	A0A0B7ACW2	gi|109157294|pdb|2CE6|A	Chain A, Structure Of Helix Pomatia Agglutinin With No Ligands	incomplete	T,P	H-type lectin
HACG01037899	A0A0B7AUP1	gi|405965843|gb|EKC31192.1|	Protein ERGIC-53 [Crassostrea gigas]	complete	T	L-type lectin
HACG01035528	A0A0B7ANH6	gi|524866089|ref|XP_005089869.1|	PREDICTED: vesicular integral-membrane protein VIP36-like [Aplysia californica]	complete	T,P	L-type lectin
HACG01037898	A0A0B7AV64	gi|405965843|gb|EKC31192.1|	Protein ERGIC-53 [Crassostrea gigas]	complete	T	L-type lectin
HACG01031276	A0A0B7ADM8	gi|524895639|ref|XP_005104301.1|	PREDICTED: malectin-B-like [Aplysia californica]	incomplete	T,P	malectin
HACG01001221	A0A0B6XX19	gi|524895639|ref|XP_005104301.1|	PREDICTED: malectin-B-like [Aplysia californica]	incomplete	T,P	malectin
HACG01047808	A0A0B7BNY3	gi|556113252|gb|ESP01904.1|	hypothetical protein LOTGIDRAFT_138892, partial [Lottia gigantea]	incomplete	T	R-type lectin
HACG01021988	A0A0B6ZK14	gi|524895404|ref|XP_005104185.1|	PREDICTED: polypeptide N-acetylgalactosaminyltransferase 5-like [Aplysia californica]	incomplete	T	R-type lectin
HACG01029752	A0A0B7A7H3	gi|524896314|ref|XP_005104633.1|	PREDICTED: polypeptide N-acetylgalactosaminyltransferase 2-like [Aplysia californica]	complete	T	R-type lectin
HACG01007254	A0A0B6YD72	gi|556102066|gb|ESO90718.1|	hypothetical protein LOTGIDRAFT_123129, partial [Lottia gigantea]	incomplete	T	R-type lectin
HACG01016075	A0A0B6Z5I6	gi|524888837|ref|XP_005100983.1|	PREDICTED: N-acetylgalactosaminyltransferase 7-like isoform X1 [Aplysia californica]	incomplete	T	R-type lectin
HACG01016840	A0A0B6Z7K1	gi|524865257|ref|XP_005089459.1|	PREDICTED: polypeptide N-acetylgalactosaminyltransferase 11-like isoform X2 [Aplysia californica]	incomplete	T	R-type lectin
HACG01048474	A0A0B7BPW3	gi|321455342|gb|EFX66478.1|	hypothetical protein DAPPUDRAFT_302681 [Daphnia pulex]	complete	T	R-type lectin
HACG01001341	A0A0B6XXC9	gi|405966386|gb|EKC31679.1|	Polypeptide N-acetylgalactosaminyltransferase 5 [Crassostrea gigas]	incomplete	T	R-type lectin
HACG01014621	A0A0B6Z0Q0	gi|524884259|ref|XP_005098751.1|	PREDICTED: putative polypeptide N-acetylgalactosaminyltransferase 10-like, partial [Aplysia californica]	incomplete	T	R-type lectin
HACG01047787	A0A0B7BP25	gi|556113252|gb|ESP01904.1|	hypothetical protein LOTGIDRAFT_138892, partial [Lottia gigantea]	incomplete	T	R-type lectin
HACG01047796	A0A0B7BQL2	gi|556113252|gb|ESP01904.1|	hypothetical protein LOTGIDRAFT_138892, partial [Lottia gigantea]	incomplete	T	R-type lectin
HACG01047797	A0A0B7BP35	gi|556113252|gb|ESP01904.1|	hypothetical protein LOTGIDRAFT_138892, partial [Lottia gigantea]	incomplete	T	R-type lectin
HACG01047799	A0A0B7BMZ6	gi|556113252|gb|ESP01904.1|	hypothetical protein LOTGIDRAFT_138892, partial [Lottia gigantea]	incomplete	T	R-type lectin
HACG01047800	A0A0B7BR64	gi|556113252|gb|ESP01904.1|	hypothetical protein LOTGIDRAFT_138892, partial [Lottia gigantea]	incomplete	T	R-type lectin
HACG01047803	A0A0B7BNX7	gi|556113252|gb|ESP01904.1|	hypothetical protein LOTGIDRAFT_138892, partial [Lottia gigantea]	incomplete	T	R-type lectin
HACG01047788	A0A0B7BNW1	gi|556113252|gb|ESP01904.1|	hypothetical protein LOTGIDRAFT_138892, partial [Lottia gigantea]	incomplete	T	R-type lectin
HACG01047804	A0A0B7BN02	gi|556113252|gb|ESP01904.1|	hypothetical protein LOTGIDRAFT_138892, partial [Lottia gigantea]	incomplete	T	R-type lectin
HACG01047805	A0A0B7BR68	gi|556113252|gb|ESP01904.1|	hypothetical protein LOTGIDRAFT_138892, partial [Lottia gigantea]	incomplete	T	R-type lectin
HACG01047806	A0A0B7BQM0	gi|556113252|gb|ESP01904.1|	hypothetical protein LOTGIDRAFT_138892, partial [Lottia gigantea]	incomplete	T	R-type lectin
HACG01047793	A0A0B7BNW6	gi|556113252|gb|ESP01904.1|	hypothetical protein LOTGIDRAFT_138892, partial [Lottia gigantea]	incomplete	T	R-type lectin
HACG01047795	A0A0B7BR61	gi|556113252|gb|ESP01904.1|	hypothetical protein LOTGIDRAFT_138892, partial [Lottia gigantea]	complete	T	R-type lectin
HACG01047801	A0A0B7BQL6	gi|556113252|gb|ESP01904.1|	hypothetical protein LOTGIDRAFT_138892, partial [Lottia gigantea]	complete	T	R-type lectin
HACG01047802	A0A0B7BP40	gi|556113252|gb|ESP01904.1|	hypothetical protein LOTGIDRAFT_138892, partial [Lottia gigantea]	complete	T	R-type lectin
HACG01021077	A0A0B6ZHX6	gi|556093434|gb|ESO82087.1|	hypothetical protein LOTGIDRAFT_198292 [Lottia gigantea]	incomplete	T	R-type lectin
HACG01006013	A0A0B6Y9U3	gi|556093434|gb|ESO82087.1|	hypothetical protein LOTGIDRAFT_198292 [Lottia gigantea]	incomplete	T	R-type lectin
HACG01021335	A0A0B6ZKB8	gi|524864445|ref|XP_005089059.1|	PREDICTED: polypeptide N-acetylgalactosaminyltransferase 1-like isoform X2 [Aplysia californica]	incomplete	T	R-type lectin
HACG01021336	A0A0B6ZK08	gi|524864445|ref|XP_005089059.1|	PREDICTED: polypeptide N-acetylgalactosaminyltransferase 1-like isoform X2 [Aplysia californica]	incomplete	T	R-type lectin
HACG01021337	A0A0B6ZIJ7	gi|524864445|ref|XP_005089059.1|	PREDICTED: polypeptide N-acetylgalactosaminyltransferase 1-like isoform X2 [Aplysia californica]	incomplete	T	R-type lectin
HACG01021339	A0A0B6ZHU7	gi|524864445|ref|XP_005089059.1|	PREDICTED: polypeptide N-acetylgalactosaminyltransferase 1-like isoform X2 [Aplysia californica]	incomplete	T	R-type lectin
HACG01020707	A0A0B6ZGP3	gi|556102066|gb|ESO90718.1|	hypothetical protein LOTGIDRAFT_123129, partial [Lottia gigantea]	incomplete	T	R-type lectin
HACG01024588	A0A0B6ZSF6	gi|524890796|ref|XP_005101940.1|	PREDICTED: polypeptide N-acetylgalactosaminyltransferase 5-like [Aplysia californica]	incomplete	T	R-type lectin
HACG01031422	A0A0B7AC93	gi|556112926|gb|ESP01578.1|	hypothetical protein LOTGIDRAFT_91617, partial [Lottia gigantea]	complete	T	R-type lectin
HACG01035094	A0A0B7ALS6	gi|524884463|ref|XP_005098851.1|	PREDICTED: techylectin-5A-like [Aplysia californica]	complete	T	techylectin
HACG01048564	A0A0B7BQ88	gi|524914011|ref|XP_005111826.1|	PREDICTED: techylectin-5B-like [Aplysia californica]	incomplete	T	techylectin
HACG01048539	A0A0B7BQ30	gi|524914011|ref|XP_005111826.1|	PREDICTED: techylectin-5B-like [Aplysia californica]	incomplete	T	techylectin
HACG01048544	A0A0B7BQ39	gi|3347852|gb|AAC27743.1|	sialic acid-binding lectin 2 [Limax flavus]	incomplete	T	lectin
HACG01048562	A0A0B7BRF0	gi|3347852|gb|AAC27743.1|	sialic acid-binding lectin 2 [Limax flavus]	incomplete	T	lectin
HACG01028497	A0A0B7A402	gi|524900094|ref|XP_005106471.1|	PREDICTED: endoplasmic reticulum lectin 1-like [Aplysia californica]	incomplete	T	lectin
HACG01036252	A0A0B7AR95	gi|524875712|ref|XP_005094580.1|	PREDICTED: EMILIN-2-like [Aplysia californica]	complete	T	C1qDC
HACG01035897	A0A0B7AQ78	gi|583980443|ref|XP_006785537.1|	PREDICTED: complement C1q-like protein 2-like [Neolamprologus brichardi]	complete	T	C1qDC
HACG01028640	A0A0B7A6A0			complete	T	C1qDC
HACG01025936	A0A0B6ZWR8	gi|524913834|ref|XP_005111741.1|	PREDICTED: uncharacterized protein LOC101856230 [Aplysia californica]	complete	T,P	C1qDC
HACG01026990	A0A0B7A1M5	gi|38043955|emb|CAD83837.1|	sialic acid binding lectin [Cepaea hortensis]	complete	T,P	C1qDC
HACG01029563	A0A0B7A6S4	gi|38043955|emb|CAD83837.1|	sialic acid binding lectin [Cepaea hortensis]	complete	T,P	C1qDC
HACG01021703	A0A0B6ZJ78	gi|93209532|gb|ABF00124.1|	sialic acid binding lectin [Helix pomatia]	complete	T,P	C1qDC
HACG01017763	A0A0B6Z7Y0	gi|325504319|emb|CBX41659.1|	putative C1q domain containing protein MgC1q10 [Mytilus galloprovincialis]	incomplete	T	C1qDC
HACG01017764	A0A0B6Z7N3	gi|325504319|emb|CBX41659.1|	putative C1q domain containing protein MgC1q10 [Mytilus galloprovincialis]	incomplete	T	C1qDC
HACG01002529	A0A0B6XZR2	gi|325504319|emb|CBX41659.1|	putative C1q domain containing protein MgC1q10 [Mytilus galloprovincialis]	incomplete	T	C1qDC
HACG01016086	A0A0B6Z515	gi|325504327|emb|CBX41663.1|	putative C1q domain containing protein MgC1q14 [Mytilus galloprovincialis]	incomplete	T	C1qDC
HACG01030595	A0A0B7ABZ9	gi|325504381|emb|CBX41690.1|	putative C1q domain containing protein MgC1q41 [Mytilus galloprovincialis]	incomplete	T	C1qDC
HACG01046215	A0A0B7BLS1	gi|325504381|emb|CBX41690.1|	putative C1q domain containing protein MgC1q41 [Mytilus galloprovincialis]	incomplete	T	C1qDC
HACG01035896	A0A0B7ARZ8	gi|325504405|emb|CBX41702.1|	putative C1q domain containing protein MgC1q53 [Mytilus galloprovincialis]	incomplete	T	C1qDC
HACG01004395	A0A0B6Y6Y9	gi|325504405|emb|CBX41702.1|	putative C1q domain containing protein MgC1q53 [Mytilus galloprovincialis]	incomplete	T	C1qDC
HACG01046212	A0A0B7BJL4	gi|325504493|emb|CBX41746.1|	putative C1q domain containing protein MgC1q97 [Mytilus galloprovincialis]	incomplete	T	C1qDC
HACG01035894	A0A0B7ANY3	gi|405955760|gb|EKC22740.1|	Complement C1q subcomponent subunit B [Crassostrea gigas]	incomplete	T	C1qDC
HACG01043591	A0A0B7BDS4	gi|405963338|gb|EKC28921.1|	Collagen alpha-2(VIII) chain [Crassostrea gigas]	incomplete	T	C1qDC
HACG01038634	A0A0B7AX10	gi|405972817|gb|EKC37565.1|	Caprin-2 [Crassostrea gigas]	incomplete	T	C1qDC
HACG01046213	A0A0B7BJF9	gi|472825914|gb|AGI44588.1|	C1q domain containing protein [Azumapecten farreri]	incomplete	T	C1qDC
HACG01046216	A0A0B7BL57	gi|472825914|gb|AGI44588.1|	C1q domain containing protein [Azumapecten farreri]	incomplete	T	C1qDC
HACG01036254	A0A0B7APY9	gi|524875712|ref|XP_005094580.1|	PREDICTED: EMILIN-2-like [Aplysia californica]	incomplete	T	C1qDC
HACG01043593	A0A0B7BBR7			incomplete	T	C1qDC
HACG01047292	A0A0B7BMM0	gi|126697410|gb|ABO26662.1|	sialic acid binding lectin [Haliotis discus discus]	incomplete	T	C1qDC
HACG01038628	A0A0B7AXK0	gi|38043955|emb|CAD83837.1|	sialic acid binding lectin [Cepaea hortensis]	incomplete	T	C1qDC
HACG01046214	A0A0B7BIB5	gi|38043955|emb|CAD83837.1|	sialic acid binding lectin [Cepaea hortensis]	incomplete	T	C1qDC
HACG01034588	A0A0B7AKU3	gi|93209532|gb|ABF00124.1|	sialic acid binding lectin [Helix pomatia]	incomplete	T	C1qDC
HACG01053024	A0A0B7C5Z0	gi|93209532|gb|ABF00124.1|	sialic acid binding lectin [Helix pomatia]	incomplete	T	C1qDC
HACG01030596	A0A0B7ABV6	gi|325504381|emb|CBX41690.1|	putative C1q domain containing protein MgC1q41 [Mytilus galloprovincialis]	incomplete	T, P	C1qDC
HACG01023214	A0A0B6ZN56	gi|126697410|gb|ABO26662.1|	sialic acid binding lectin [Haliotis discus discus]	incomplete	T,P	C1qDC
HACG01034998	A0A0B7ALE7	gi|126697410|gb|ABO26662.1|	sialic acid binding lectin [Haliotis discus discus]	incomplete	T,P	C1qDC
HACG01030594	A0A0B7A907	gi|38043955|emb|CAD83837.1|	sialic acid binding lectin [Cepaea hortensis]	incomplete	T,P	C1qDC
HACG01021068	A0A0B6ZHG1	gi|93209532|gb|ABF00124.1|	sialic acid binding lectin [Helix pomatia]	incomplete	T,P	C1qDC
HACG01033827	A0A0B7AJC2	gi|524914829|ref|XP_005112224.1|	PREDICTED: uncharacterized protein LOC101850618 [Aplysia californica]	complete	T,P	C1qDC
HACG01039562	A0A0B7B0Q7	gi|40218026|gb|AAR82936.1|	macrophage expressed protein [Haliotis rufescens]	complete	T	pore-forming membrane attack
HACG01039554	A0A0B7AZC8	gi|524916402|ref|XP_005112978.1|	PREDICTED: uncharacterized protein LOC101845147 [Aplysia californica]	complete	T	pore-forming membrane attack
HACG01049677	A0A0B7BUF6	gi|119112553|ref|XP_001237961.1|	AGAP007821-PA [Anopheles gambiae str. PEST] >gi|116123408|gb|EAU76394.1| AGAP007821-PA [Anopheles gambiae str. PEST]	complete	T	toxin-like
HACG01045213	A0A0B7BGI4	gi|193685923|ref|XP_001950560.1|	PREDICTED: uncharacterized protein LOC100163563 isoform X1 [Acyrthosiphon pisum] >gi|641662535|ref|XP_008182290.1| PREDICTED: uncharacterized protein LOC100163563 isoform X1 [Acyrthosiphon pisum]	complete	T	toxin-like
